# Supplementary material
Source: MDPI journal article supplement (https://www.mdpi.com/2073-4395/14/2/250)
Supplement: s1 [file s1 › Supplementary Tables.xlsx]

## Sheet: Table S1
Table S1. Conserved features used to perform genome-wide identification of gene families in this study.
Gene family	Abbreviation	Conserved Pfam domains
Cellulose synthase and cellulose synthase-like family	CesA/Csl	PF00535 or PF03552
Glycosyl hydrolase family 9	GH9	PF00759
Glycosyl transferase family 8	GT8	PF01501
Laccase family	-	PF00394, PF07731, and PF07732
Pectate lyase-like family	PLL	PF00544
Pectin methylesterase family	PME	PF01095
Xyloglucan endotransglucosylase/hydrolase family	XTH	PF00722 and PF06955
Heat shock protein 20	Hsp20	PF00011
Heat shock protein 40	Hsp40	PF00226
Heat shock protein 60	Hsp60	PF00118
Heat shock protein 70	Hsp70	PF00012
Heat shock protein 90	Hsp90	PF00183
Heat shock protein 100	Hsp100	PF02861

## Sheet: Table S2
Table S2. Statistics on RNA-seq data.
Sample	Raw reads	Raw bases (Gb)	Clean reads	Clean bases (Gb)	Total_map	Unique_map	Multi_map	Splice_map	Unsplice_map	Proper_map
C244_CK_3_1	43786514	6.57	42298046	6.34	37905250 (89.61%)	35154874 (83.11%)	2750376 (6.5%)	12947753 (30.61%)	22207121 (52.5%)	32926118 (77.84%)
C244_CK_3_2	42238546	6.34	41129864	6.17	36780284 (89.42%)	34113653 (82.94%)	2666631 (6.48%)	12437498 (30.24%)	21676155 (52.7%)	31803150 (77.32%)
C244_CK_3_3	42384238	6.36	40580374	6.09	36345192 (89.56%)	33315313 (82.1%)	3029879 (7.47%)	12215153 (30.1%)	21100160 (52.0%)	31596618 (77.86%)
C244_RS_3_1	43188678	6.48	41691850	6.25	38469957 (92.27%)	35596318 (85.38%)	2873639 (6.89%)	12795541 (30.69%)	22800777 (54.69%)	33062142 (79.3%)
C244_RS_3_2	42275436	6.34	40215134	6.03	37069994 (92.18%)	34234505 (85.13%)	2835489 (7.05%)	12010797 (29.87%)	22223708 (55.26%)	31686578 (78.79%)
C244_RS_3_3	43582250	6.54	41316186	6.2	38002987 (91.98%)	35180506 (85.15%)	2822481 (6.83%)	12530822 (30.33%)	22649684 (54.82%)	32545534 (78.77%)
C244_CK_9_1	42536458	6.38	40279270	6.04	36385735 (90.33%)	33695117 (83.65%)	2690618 (6.68%)	11809219 (29.32%)	21885898 (54.34%)	31389130 (77.93%)
C244_CK_9_2	42888516	6.43	41601202	6.24	37375100 (89.84%)	34542286 (83.03%)	2832814 (6.81%)	12646526 (30.4%)	21895760 (52.63%)	32170774 (77.33%)
C244_CK_9_3	42009962	6.3	41109858	6.17	36952257 (89.89%)	34188898 (83.16%)	2763359 (6.72%)	12461755 (30.31%)	21727143 (52.85%)	32053546 (77.97%)
C244_RS_9_1	46427670	6.96	45220810	6.78	41596778 (91.99%)	38604716 (85.37%)	2992062 (6.62%)	14440378 (31.93%)	24164338 (53.44%)	36098262 (79.83%)
C244_RS_9_2	41965322	6.29	40732570	6.11	37504434 (92.07%)	34796357 (85.43%)	2708077 (6.65%)	12940965 (31.77%)	21855392 (53.66%)	32567544 (79.95%)
C244_RS_9_3	43946824	6.59	42814502	6.42	39202762 (91.56%)	36326264 (84.85%)	2876498 (6.72%)	13635514 (31.85%)	22690750 (53.0%)	33947076 (79.29%)
C244_CK_24_1	41824646	6.27	40628768	6.09	36465165 (89.75%)	33824618 (83.25%)	2640547 (6.5%)	11968403 (29.46%)	21856215 (53.79%)	31677748 (77.97%)
C244_CK_24_2	43324994	6.5	42407928	6.36	38170748 (90.01%)	35445183 (83.58%)	2725565 (6.43%)	12540037 (29.57%)	22905146 (54.01%)	33206234 (78.3%)
C244_CK_24_3	41406308	6.21	40546642	6.08	36571227 (90.2%)	33935689 (83.7%)	2635538 (6.5%)	12004529 (29.61%)	21931160 (54.09%)	31718810 (78.23%)
C244_RS_24_1	46867526	7.03	45476388	6.82	41778667 (91.87%)	38704731 (85.11%)	3073936 (6.76%)	13533686 (29.76%)	25171045 (55.35%)	36097890 (79.38%)
C244_RS_24_2	42251896	6.34	41126282	6.17	37831618 (91.99%)	35093058 (85.33%)	2738560 (6.66%)	12323670 (29.97%)	22769388 (55.36%)	32759704 (79.66%)
C244_RS_24_3	45663442	6.85	44342628	6.65	40244366 (90.76%)	37302822 (84.12%)	2941544 (6.63%)	12817786 (28.91%)	24485036 (55.22%)	34300564 (77.35%)
C244_CK_48_1	45311416	6.8	43053290	6.46	38685408 (89.85%)	35835981 (83.24%)	2849427 (6.62%)	12596591 (29.26%)	23239390 (53.98%)	33067224 (76.81%)
C244_CK_48_2	46059800	6.91	44879734	6.73	39999914 (89.13%)	37202097 (82.89%)	2797817 (6.23%)	13224682 (29.47%)	23977415 (53.43%)	34583016 (77.06%)
C244_CK_48_3	41454146	6.22	40327686	6.05	35882956 (88.98%)	33330961 (82.65%)	2551995 (6.33%)	11758214 (29.16%)	21572747 (53.49%)	31102942 (77.13%)
C244_RS_48_1	46217306	6.93	44968256	6.75	40554080 (90.18%)	37410448 (83.19%)	3143632 (6.99%)	12985707 (28.88%)	24424741 (54.32%)	35607346 (79.18%)
C244_RS_48_2	43802208	6.57	42926784	6.44	38520043 (89.73%)	35837872 (83.49%)	2682171 (6.25%)	12393391 (28.87%)	23444481 (54.62%)	33499758 (78.04%)
C244_RS_48_3	47041566	7.06	46191546	6.93	41655426 (90.18%)	38781832 (83.96%)	2873594 (6.22%)	13471335 (29.16%)	25310497 (54.79%)	36342134 (78.68%)
C035_CK_3_1	44575276	6.69	42868452	6.43	38975922 (90.92%)	36102884 (84.22%)	2873038 (6.7%)	13239776 (30.88%)	22863108 (53.33%)	33234064 (77.53%)
C035_CK_3_2	44011436	6.6	42147712	6.32	37955687 (90.05%)	35132964 (83.36%)	2822723 (6.7%)	12855882 (30.5%)	22277082 (52.85%)	32019276 (75.97%)
C035_CK_3_3	44133428	6.62	42297388	6.34	38134037 (90.16%)	35335582 (83.54%)	2798455 (6.62%)	12859380 (30.4%)	22476202 (53.14%)	32383630 (76.56%)
C035_RS_3_1	44586818	6.69	42182830	6.33	37511144 (88.93%)	34658668 (82.16%)	2852476 (6.76%)	12257175 (29.06%)	22401493 (53.11%)	31771024 (75.32%)
C035_RS_3_2	45247446	6.79	44131812	6.62	39273899 (88.99%)	36538267 (82.79%)	2735632 (6.2%)	13300306 (30.14%)	23237961 (52.66%)	34256770 (77.62%)
C035_RS_3_3	44663900	6.7	43616344	6.54	38732883 (88.8%)	35971201 (82.47%)	2761682 (6.33%)	13057428 (29.94%)	22913773 (52.53%)	33708916 (77.29%)
C035_CK_9_1	44449102	6.67	43442742	6.52	40036370 (92.16%)	37276514 (85.81%)	2759856 (6.35%)	13988807 (32.2%)	23287707 (53.61%)	35052292 (80.69%)
C035_CK_9_2	44614130	6.69	43384442	6.51	39804890 (91.75%)	36666355 (84.51%)	3138535 (7.23%)	13687297 (31.55%)	22979058 (52.97%)	34935264 (80.52%)
C035_CK_9_3	44517230	6.68	43170948	6.48	39714710 (91.99%)	37005040 (85.72%)	2709670 (6.28%)	13888039 (32.17%)	23117001 (53.55%)	34699818 (80.38%)
C035_RS_9_1	43180608	6.48	41960710	6.29	37612113 (89.64%)	34944625 (83.28%)	2667488 (6.36%)	13133379 (31.3%)	21811246 (51.98%)	32159746 (76.64%)
C035_RS_9_2	44354230	6.65	43182524	6.48	38531787 (89.23%)	35789998 (82.88%)	2741789 (6.35%)	13264359 (30.72%)	22525639 (52.16%)	33017686 (76.46%)
C035_RS_9_3	44288540	6.64	42982988	6.45	38497284 (89.56%)	35753727 (83.18%)	2743557 (6.38%)	13349387 (31.06%)	22404340 (52.12%)	33018860 (76.82%)
C035_CK_24_1	42445950	6.37	40466628	6.07	36707255 (90.71%)	33990878 (84.0%)	2716377 (6.71%)	12209817 (30.17%)	21781061 (53.82%)	31305958 (77.36%)
C035_CK_24_2	44329452	6.65	43129200	6.47	39424869 (91.41%)	36615107 (84.9%)	2809762 (6.51%)	13163560 (30.52%)	23451547 (54.38%)	34003422 (78.84%)
C035_CK_24_3	44535250	6.68	42672052	6.4	38938042 (91.25%)	36060132 (84.51%)	2877910 (6.74%)	12860292 (30.14%)	23199840 (54.37%)	33012564 (77.36%)
C035_RS_24_1	44311836	6.65	41851928	6.28	37714680 (90.11%)	34968032 (83.55%)	2746648 (6.56%)	12311095 (29.42%)	22656937 (54.14%)	32344144 (77.28%)
C035_RS_24_2	42574262	6.39	41212874	6.18	36610521 (88.83%)	33949101 (82.37%)	2661420 (6.46%)	12162641 (29.51%)	21786460 (52.86%)	31107634 (75.48%)
C035_RS_24_3	44342712	6.65	43252812	6.49	39087033 (90.37%)	36287288 (83.9%)	2799745 (6.47%)	12979205 (30.01%)	23308083 (53.89%)	33856060 (78.27%)
C035_CK_48_1	44498092	6.67	43323882	6.5	39408673 (90.96%)	36309888 (83.81%)	3098785 (7.15%)	13007644 (30.02%)	23302244 (53.79%)	34635680 (79.95%)
C035_CK_48_2	44604888	6.69	43314978	6.5	39379985 (90.92%)	36566569 (84.42%)	2813416 (6.5%)	13078878 (30.19%)	23487691 (54.23%)	34303138 (79.19%)
C035_CK_48_3	43396442	6.51	42381998	6.36	38609627 (91.1%)	35946740 (84.82%)	2662887 (6.28%)	12940986 (30.53%)	23005754 (54.28%)	33766996 (79.67%)
C035_RS_48_1	43945570	6.59	42754904	6.41	38629264 (90.35%)	35833248 (83.81%)	2796016 (6.54%)	12865807 (30.09%)	22967441 (53.72%)	33355086 (78.01%)
C035_RS_48_2	45952312	6.89	44452774	6.67	40901506 (92.01%)	37879770 (85.21%)	3021736 (6.8%)	13949163 (31.38%)	23930607 (53.83%)	36299928 (81.66%)
C035_RS_48_3	43948596	6.59	43022100	6.45	39145479 (90.99%)	36407804 (84.63%)	2737675 (6.36%)	12676425 (29.46%)	23731379 (55.16%)	33931454 (78.87%)
C010_CK_3_1	44672096	6.7	43079902	6.46	38269134 (88.83%)	35538289 (82.49%)	2730845 (6.34%)	13165829 (30.56%)	22372460 (51.93%)	33019470 (76.65%)
C010_CK_3_2	44071090	6.61	42983322	6.45	37999315 (88.4%)	35305553 (82.14%)	2693762 (6.27%)	13045092 (30.35%)	22260461 (51.79%)	32960310 (76.68%)
C010_CK_3_3	42767208	6.42	41795652	6.27	37112546 (88.8%)	34495307 (82.53%)	2617239 (6.26%)	12783883 (30.59%)	21711424 (51.95%)	32419706 (77.57%)
C010_RS_3_1	43974714	6.6	42931362	6.44	38109426 (88.77%)	35375442 (82.4%)	2733984 (6.37%)	12863957 (29.96%)	22511485 (52.44%)	33176040 (77.28%)
C010_RS_3_2	44610868	6.69	43517460	6.53	38947251 (89.5%)	35852091 (82.39%)	3095160 (7.11%)	13161922 (30.25%)	22690169 (52.14%)	34298732 (78.82%)
C010_RS_3_3	43387720	6.51	42030944	6.3	37289608 (88.72%)	34592569 (82.3%)	2697039 (6.42%)	12598623 (29.97%)	21993946 (52.33%)	32350224 (76.97%)
C010_CK_9_1	44065354	6.61	42567088	6.39	37795423 (88.79%)	34744127 (81.62%)	3051296 (7.17%)	12691861 (29.82%)	22052266 (51.81%)	33093178 (77.74%)
C010_CK_9_2	43317314	6.5	42327292	6.35	37474416 (88.53%)	34752778 (82.1%)	2721638 (6.43%)	12743675 (30.11%)	22009103 (52.0%)	32470072 (76.71%)
C010_CK_9_3	44117426	6.62	42920174	6.44	38012872 (88.57%)	35221202 (82.06%)	2791670 (6.5%)	12934478 (30.14%)	22286724 (51.93%)	32689118 (76.16%)
C010_RS_9_1	44190032	6.63	42664970	6.4	38029275 (89.13%)	35197960 (82.5%)	2831315 (6.64%)	12719595 (29.81%)	22478365 (52.69%)	32486226 (76.14%)
C010_RS_9_2	43857634	6.58	42162458	6.32	37531708 (89.02%)	34752054 (82.42%)	2779654 (6.59%)	12746127 (30.23%)	22005927 (52.19%)	31808044 (75.44%)
C010_RS_9_3	45409690	6.81	43930294	6.59	39328791 (89.53%)	36461581 (83.0%)	2867210 (6.53%)	13308590 (30.29%)	23152991 (52.7%)	33709218 (76.73%)
C010_CK_24_1	45175122	6.78	43464744	6.52	38452640 (88.47%)	35662117 (82.05%)	2790523 (6.42%)	12490647 (28.74%)	23171470 (53.31%)	33425194 (76.9%)
C010_CK_24_2	49549772	7.43	47420944	7.11	41309374 (87.11%)	38195911 (80.55%)	3113463 (6.57%)	13501949 (28.47%)	24693962 (52.07%)	35694936 (75.27%)
C010_CK_24_3	44410828	6.66	43168948	6.48	38237408 (88.58%)	35520475 (82.28%)	2716933 (6.29%)	12664160 (29.34%)	22856315 (52.95%)	33555490 (77.73%)
C010_RS_24_1	44598776	6.69	42917908	6.44	37982857 (88.5%)	35175761 (81.96%)	2807096 (6.54%)	12533422 (29.2%)	22642339 (52.76%)	33036776 (76.98%)
C010_RS_24_2	44182312	6.63	42869648	6.43	38194218 (89.09%)	35426574 (82.64%)	2767644 (6.46%)	12594957 (29.38%)	22831617 (53.26%)	33445470 (78.02%)
C010_RS_24_3	43387368	6.51	41930652	6.29	37074086 (88.42%)	34366373 (81.96%)	2707713 (6.46%)	12218808 (29.14%)	22147565 (52.82%)	32118186 (76.6%)
C010_CK_48_1	43348788	6.5	41779224	6.27	36633493 (87.68%)	33935961 (81.23%)	2697532 (6.46%)	11931251 (28.56%)	22004710 (52.67%)	31712880 (75.91%)
C010_CK_48_2	43965778	6.59	42851198	6.43	37531550 (87.59%)	34814752 (81.25%)	2716798 (6.34%)	12223419 (28.53%)	22591333 (52.72%)	32405642 (75.62%)
C010_CK_48_3	43681268	6.55	42557110	6.38	37603617 (88.36%)	34875893 (81.95%)	2727724 (6.41%)	12289114 (28.88%)	22586779 (53.07%)	32507508 (76.39%)
C010_RS_48_1	44314776	6.65	43266172	6.49	38510750 (89.01%)	35677989 (82.46%)	2832761 (6.55%)	12618196 (29.16%)	23059793 (53.3%)	33220674 (76.78%)
C010_RS_48_2	44926592	6.74	43725012	6.56	39036163 (89.28%)	36253658 (82.91%)	2782505 (6.36%)	12808078 (29.29%)	23445580 (53.62%)	33648606 (76.96%)
C010_RS_48_3	46692666	7	45197028	6.78	40557501 (89.73%)	37641777 (83.28%)	2915724 (6.45%)	13315751 (29.46%)	24326026 (53.82%)	35330570 (78.17%)
Total_map: the number and percentage of reads that were mapped to the genome.
Unique_map: the number and percentage of reads that were mapped to the unique location of the genome.
Multi_map: the number and percentage of reads that were mapped to multiple locations of the genome.
Splice_map: the number and percentage of reads that were split and then mapped to the genome.
Unsplice_map: the number and percentage of the mapped reads that were not split.
Proper_map: the number and percentage of the mapped reads showing paired read1 and read2.

## Sheet: Table S3
Table S3. List of DEGs identified in this study.
C244_RS_3 hpi vs C244_CK_3 hpi			C244_RS_9 hpi vs C244_CK_9 hpi			C244_RS_24 hpi vs C244_CK_24 hpi			C244_RS_48 hpi vs C244_CK_48 hpi			C010_RS_3 hpi vs C010_CK_3 hpi			C010_RS_9 hpi vs C010_CK_9 hpi			C010_RS_24 hpi vs C010_CK_24 hpi			C010_RS_48 hpi vs C010_CK_48 hpi			C035_RS_3 hpi vs C035_CK_3 hpi			C035_RS_9 hpi vs C035_CK_9 hpi			C035_RS_24 hpi vs C035_CK_24 hpi			C035_RS_48 hpi vs C035_CK_48 hpi			C244_RS_3 hpi vs C035_RS_3 hpi			C244_RS_9 hpi vs C035_RS_9 hpi			C244_RS_24 hpi vs C035_RS_24 hpi			C244_RS_48 hpi vs C035_RS_48 hpi			C010_RS_3 hpi vs C035_RS_3 hpi
Up-regulated	Down-regulated		Up-regulated	Down-regulated		Up-regulated	Down-regulated		Up-regulated	Down-regulated		Up-regulated	Down-regulated		Up-regulated	Down-regulated		Up-regulated	Down-regulated		Up-regulated	Down-regulated		Up-regulated	Down-regulated		Up-regulated	Down-regulated		Up-regulated	Down-regulated		Up-regulated	Down-regulated		Up-regulated	Down-regulated		Up-regulated	Down-regulated		Up-regulated	Down-regulated		Up-regulated	Down-regulated		Up-regulated	Down-regulated
Nitab4.5_0002418g0010	Nitab4.5_0004422g0050		Nitab4.5_0004821g0040	Nitab4.5_0000175g0130		Nitab4.5_0002418g0030	Nitab4.5_0003541g0040		Nitab4.5_0002418g0030	Nitab4.5_0001168g0160		Nitab4.5_0000021g0740	Nitab4.5_0000678g0100		Nitab4.5_0000005g0070	Nitab4.5_0004537g0030		Nitab4.5_0002418g0030	Nitab4.5_0000130g0140		Nitab4.5_0002418g0030	Nitab4.5_0005410g0010		Nitab4.5_0002418g0010	Nitab4.5_0000678g0100		Nitab4.5_0003434g0020	Nitab4.5_0000784g0060		Nitab4.5_0002381g0080	Nitab4.5_0006994g0080		Nitab4.5_0000091g0420	Nitab4.5_0000005g0070		Nitab4.5_0011038g0010	Nitab4.5_0000915g0150		Nitab4.5_0000784g0060	Nitab4.5_0000254g0050		Nitab4.5_0011038g0010	Nitab4.5_0021429g0010		Nitab4.5_0011038g0010	Nitab4.5_0001305g0040		Nitab4.5_0000175g0130	Nitab4.5_0002418g0030
Nitab4.5_0002418g0030	Nitab4.5_0007255g0010		Nitab4.5_0008174g0030	Nitab4.5_0000254g0050		Nitab4.5_0011038g0010	Nitab4.5_0006994g0080		Nitab4.5_0011038g0010	Nitab4.5_0000175g0130		Nitab4.5_0000482g0250	Nitab4.5_0004422g0050		Nitab4.5_0002045g0080	Nitab4.5_0001885g0050		Nitab4.5_0011038g0010	Nitab4.5_0002015g0090		Nitab4.5_0011038g0010	Nitab4.5_0000175g0130		Nitab4.5_0000021g0740	Nitab4.5_0002316g0030		Nitab4.5_0000005g0070	Nitab4.5_0001885g0050		Nitab4.5_0002201g0040	Nitab4.5_0000241g0040		Nitab4.5_0000704g0090	Nitab4.5_0004330g0030		Nitab4.5_0005893g0010	Nitab4.5_0004189g0010		Nitab4.5_0000143g0390	Nitab4.5_0000776g0020		Nitab4.5_0000130g0130	Nitab4.5_0006040g0020		Nitab4.5_0000581g0040	Nitab4.5_0005060g0010		Nitab4.5_0001091g0070	Nitab4.5_0006778g0010
Nitab4.5_0000482g0250	Nitab4.5_0004801g0010		Nitab4.5_0002231g0070	Nitab4.5_0001059g0140		Nitab4.5_0002971g0010	Nitab4.5_0000620g0190		Nitab4.5_0000130g0130	Nitab4.5_0000254g0040		Nitab4.5_0008863g0010	Nitab4.5_0007255g0010		Nitab4.5_0004821g0040	Nitab4.5_0007900g0010		Nitab4.5_0000915g0150	Nitab4.5_0000495g0090		Nitab4.5_0000130g0130	Nitab4.5_0003250g0040		Nitab4.5_0000482g0250	Nitab4.5_0000895g0190		Nitab4.5_0004821g0040	Nitab4.5_0000522g0150		Nitab4.5_0008332g0030	Nitab4.5_0004330g0030		Nitab4.5_0002381g0080	Nitab4.5_0000620g0190		Nitab4.5_0000036g0180	Nitab4.5_0000296g0060		Nitab4.5_0004644g0020	Nitab4.5_0000915g0150		Nitab4.5_0000143g0390	Nitab4.5_0000770g0120		Nitab4.5_0000143g0390	Nitab4.5_0021429g0010		Nitab4.5_0004802g0010	Nitab4.5_0005786g0030
Nitab4.5_0008863g0010	Nitab4.5_0001168g0160		Nitab4.5_0001187g0090	Nitab4.5_0007945g0010		Nitab4.5_0001227g0020	Nitab4.5_0010637g0020		Nitab4.5_0004330g0020	Nitab4.5_0000620g0190		Nitab4.5_0000978g0190	Nitab4.5_0000096g0200		Nitab4.5_0008174g0030	Nitab4.5_0000522g0150		Nitab4.5_0004189g0010	Nitab4.5_0001561g0110		Nitab4.5_0000130g0140	Nitab4.5_0005752g0010		Nitab4.5_0008863g0010	Nitab4.5_0004422g0050		Nitab4.5_0006116g0010	Nitab4.5_0000620g0190		Nitab4.5_0006014g0070	Nitab4.5_0000620g0190		Nitab4.5_0002201g0040	Nitab4.5_0002438g0100		Nitab4.5_0000143g0390	Nitab4.5_0004814g0010		Nitab4.5_0001991g0040	Nitab4.5_0003478g0010		Nitab4.5_0000143g0380	Nitab4.5_0011277g0010		Nitab4.5_0003823g0040	Nitab4.5_0000111g0050		Nitab4.5_0000143g0390	Nitab4.5_0000402g0160
Nitab4.5_0000978g0190	Nitab4.5_0001264g0170		Nitab4.5_0000670g0050	Nitab4.5_0000148g0060		Nitab4.5_0005893g0010	Nitab4.5_0001091g0070		Nitab4.5_0001227g0020	Nitab4.5_0001091g0070		Nitab4.5_0006519g0030	Nitab4.5_0002692g0080		Nitab4.5_0009635g0010	Nitab4.5_0003848g0030		Nitab4.5_0002196g0070	Nitab4.5_0001295g0040		Nitab4.5_0002045g0080	Nitab4.5_0000620g0190		Nitab4.5_0000978g0190	Nitab4.5_0007255g0010		Nitab4.5_0008174g0030	Nitab4.5_0003848g0030		Nitab4.5_0012646g0010	Nitab4.5_0000620g0210		Nitab4.5_0001091g0070	Nitab4.5_0009276g0020		Nitab4.5_0012104g0010	Nitab4.5_0000352g0020		Nitab4.5_0000143g0380	Nitab4.5_0005743g0030		Nitab4.5_0013698g0010	Nitab4.5_0002096g0080		Nitab4.5_0002926g0010	Nitab4.5_0006040g0020		Nitab4.5_0004485g0020	Nitab4.5_0000309g0010
Nitab4.5_0006519g0030	Nitab4.5_0001264g0190		Nitab4.5_0003215g0010	Nitab4.5_0000581g0040		Nitab4.5_0000827g0040	Nitab4.5_0004802g0010		Nitab4.5_0004618g0010	Nitab4.5_0004802g0010		Nitab4.5_0000130g0130	Nitab4.5_0000026g0110		Nitab4.5_0000915g0150	Nitab4.5_0002438g0100		Nitab4.5_0000148g0060	Nitab4.5_0011407g0020		Nitab4.5_0004330g0020	Nitab4.5_0000620g0210		Nitab4.5_0006519g0030	Nitab4.5_0000096g0200		Nitab4.5_0000776g0020	Nitab4.5_0002438g0100		Nitab4.5_0000129g0160	Nitab4.5_0003848g0030		Nitab4.5_0000620g0100	Nitab4.5_0001924g0060		Nitab4.5_0000241g0220	Nitab4.5_0000744g0160		Nitab4.5_0005299g0010	Nitab4.5_0000581g0040		Nitab4.5_0000884g0020	Nitab4.5_0004880g0030		Nitab4.5_0000143g0380	Nitab4.5_0000770g0120		Nitab4.5_0009066g0010	Nitab4.5_0001592g0090
Nitab4.5_0008571g0010	Nitab4.5_0001401g0120		Nitab4.5_0019070g0010	Nitab4.5_0000522g0150		Nitab4.5_0000776g0020	Nitab4.5_0003254g0110		Nitab4.5_0000827g0040	Nitab4.5_0001924g0060		Nitab4.5_0000130g0140	Nitab4.5_0001168g0160		Nitab4.5_0002231g0020	Nitab4.5_0000920g0120		Nitab4.5_0000581g0040	Nitab4.5_0008214g0020		Nitab4.5_0004330g0030	Nitab4.5_0003848g0030		Nitab4.5_0008571g0010	Nitab4.5_0002692g0080		Nitab4.5_0004431g0030	Nitab4.5_0000649g0100		Nitab4.5_0005254g0020	Nitab4.5_0000620g0200		Nitab4.5_0000770g0120	Nitab4.5_0016989g0010		Nitab4.5_0002604g0010	Nitab4.5_0005786g0030		Nitab4.5_0000354g0180	Nitab4.5_0005661g0020		Nitab4.5_0000143g0410	Nitab4.5_0006054g0010		Nitab4.5_0011112g0010	Nitab4.5_0000271g0320		Nitab4.5_0000130g0220	Nitab4.5_0002485g0020
Nitab4.5_0000130g0130	Nitab4.5_0002045g0080		Nitab4.5_0009510g0020	Nitab4.5_0000620g0190		Nitab4.5_0000915g0150	Nitab4.5_0007559g0010		Nitab4.5_0000915g0150	Nitab4.5_0001991g0060		Nitab4.5_0000622g0170	Nitab4.5_0001264g0170		Nitab4.5_0003478g0010	Nitab4.5_0009134g0010		Nitab4.5_0004969g0070	Nitab4.5_0000511g0060		Nitab4.5_0000827g0040	Nitab4.5_0002438g0100		Nitab4.5_0000091g0420	Nitab4.5_0003541g0040		Nitab4.5_0000288g0120	Nitab4.5_0010051g0010		Nitab4.5_0000770g0120	Nitab4.5_0002438g0100		Nitab4.5_0006543g0010	Nitab4.5_0002525g0030		Nitab4.5_0007672g0010	Nitab4.5_0000309g0010		Nitab4.5_0000565g0130	Nitab4.5_0007980g0010		Nitab4.5_0000143g0130	Nitab4.5_0001446g0050		Nitab4.5_0002408g0030	Nitab4.5_0002096g0080		Nitab4.5_0003002g0010	Nitab4.5_0005904g0070
Nitab4.5_0000130g0140	Nitab4.5_0003554g0020		Nitab4.5_0000319g0330	Nitab4.5_0003848g0030		Nitab4.5_0003478g0010	Nitab4.5_0004782g0020		Nitab4.5_0002381g0080	Nitab4.5_0000147g0330		Nitab4.5_0004330g0020	Nitab4.5_0001264g0190		Nitab4.5_0004189g0010	Nitab4.5_0000565g0200		Nitab4.5_0002408g0030	Nitab4.5_0000132g0500		Nitab4.5_0002381g0080	Nitab4.5_0001091g0070		Nitab4.5_0003714g0100	Nitab4.5_0006994g0080		Nitab4.5_0005820g0040	Nitab4.5_0000030g0510		Nitab4.5_0006543g0010	Nitab4.5_0000993g0100		Nitab4.5_0003838g0110	Nitab4.5_0008753g0020		Nitab4.5_0000472g0320	Nitab4.5_0010774g0010		Nitab4.5_0000760g0020	Nitab4.5_0007452g0030		Nitab4.5_0000254g0020	Nitab4.5_0001106g0070		Nitab4.5_0000345g0080	Nitab4.5_0002239g0010		Nitab4.5_0003002g0030	Nitab4.5_0013698g0010
Nitab4.5_0000622g0170	Nitab4.5_0004537g0030		Nitab4.5_0001642g0070	Nitab4.5_0002438g0100		Nitab4.5_0004189g0010	Nitab4.5_0001991g0060		Nitab4.5_0004189g0010	Nitab4.5_0002439g0130		Nitab4.5_0004330g0030	Nitab4.5_0001401g0120		Nitab4.5_0000468g0130	Nitab4.5_0005820g0010		Nitab4.5_0000215g0040	Nitab4.5_0001096g0030		Nitab4.5_0004189g0010	Nitab4.5_0004802g0010		Nitab4.5_0000254g0050	Nitab4.5_0000026g0110		Nitab4.5_0000960g0040	Nitab4.5_0000548g0180		Nitab4.5_0000668g0090	Nitab4.5_0004782g0020		Nitab4.5_0000108g0050	Nitab4.5_0000495g0070		Nitab4.5_0006023g0010	Nitab4.5_0000118g0120		Nitab4.5_0000108g0050	Nitab4.5_0002097g0120		Nitab4.5_0004528g0020	Nitab4.5_0001913g0060		Nitab4.5_0010662g0010	Nitab4.5_0008822g0020		Nitab4.5_0001876g0040	Nitab4.5_0000495g0090
Nitab4.5_0004330g0020	Nitab4.5_0005941g0010		Nitab4.5_0005904g0070	Nitab4.5_0001091g0070		Nitab4.5_0000148g0060	Nitab4.5_0006022g0020		Nitab4.5_0000148g0060	Nitab4.5_0006516g0030		Nitab4.5_0009635g0010	Nitab4.5_0002045g0080		Nitab4.5_0005229g0020	Nitab4.5_0004485g0020		Nitab4.5_0000129g0160	Nitab4.5_0002145g0030		Nitab4.5_0005743g0030	Nitab4.5_0006409g0050		Nitab4.5_0000827g0040	Nitab4.5_0000784g0060		Nitab4.5_0002950g0050	Nitab4.5_0009812g0030		Nitab4.5_0000839g0060	Nitab4.5_0000926g0100		Nitab4.5_0003251g0040	Nitab4.5_0009821g0010		Nitab4.5_0000702g0010	Nitab4.5_0006040g0020		Nitab4.5_0003251g0040	Nitab4.5_0003823g0040		Nitab4.5_0000278g0030	Nitab4.5_0001955g0010		Nitab4.5_0013698g0010	Nitab4.5_0003763g0030		Nitab4.5_0002721g0040	Nitab4.5_0000101g0110
Nitab4.5_0004330g0030	Nitab4.5_0010434g0040		Nitab4.5_0010662g0030	Nitab4.5_0004802g0010		Nitab4.5_0000581g0040	Nitab4.5_0005120g0030		Nitab4.5_0000581g0040	Nitab4.5_0000111g0050		Nitab4.5_0003714g0100	Nitab4.5_0003240g0040		Nitab4.5_0006756g0010	Nitab4.5_0000548g0180		Nitab4.5_0001357g0030	Nitab4.5_0000063g0220		Nitab4.5_0000148g0060	Nitab4.5_0001924g0060		Nitab4.5_0001059g0140	Nitab4.5_0001168g0160		Nitab4.5_0001305g0040	Nitab4.5_0009691g0010		Nitab4.5_0001187g0080	Nitab4.5_0000300g0180		Nitab4.5_0002762g0010	Nitab4.5_0000227g0100		Nitab4.5_0000143g0380	Nitab4.5_0001192g0080		Nitab4.5_0000469g0090	Nitab4.5_0004895g0080		Nitab4.5_0000640g0170	Nitab4.5_0001271g0010		Nitab4.5_0000151g0410	Nitab4.5_0005788g0010		Nitab4.5_0003242g0040	Nitab4.5_0009795g0020
Nitab4.5_0009635g0010	Nitab4.5_0000704g0090		Nitab4.5_0000770g0120	Nitab4.5_0000420g0010		Nitab4.5_0010051g0010	Nitab4.5_0006516g0030		Nitab4.5_0000235g0130	Nitab4.5_0007192g0010		Nitab4.5_0000827g0040	Nitab4.5_0003554g0020		Nitab4.5_0001989g0040	Nitab4.5_0000246g0130		Nitab4.5_0011455g0030	Nitab4.5_0006239g0020		Nitab4.5_0000581g0040	Nitab4.5_0002098g0030		Nitab4.5_0002015g0090	Nitab4.5_0001264g0170		Nitab4.5_0001070g0130	Nitab4.5_0004644g0020		Nitab4.5_0000108g0050	Nitab4.5_0005085g0050		Nitab4.5_0010209g0020	Nitab4.5_0012789g0020		Nitab4.5_0000516g0150	Nitab4.5_0006090g0020		Nitab4.5_0011639g0010	Nitab4.5_0000430g0050		Nitab4.5_0029531g0010	Nitab4.5_0001176g0080		Nitab4.5_0000839g0060	Nitab4.5_0000583g0180		Nitab4.5_0000143g0380	Nitab4.5_0000069g0230
Nitab4.5_0003714g0100	Nitab4.5_0003714g0140		Nitab4.5_0006543g0010	Nitab4.5_0010179g0020		Nitab4.5_0001899g0110	Nitab4.5_0001541g0090		Nitab4.5_0004529g0010	Nitab4.5_0001715g0090		Nitab4.5_0002015g0090	Nitab4.5_0005941g0010		Nitab4.5_0004431g0030	Nitab4.5_0002451g0040		Nitab4.5_0025689g0010	Nitab4.5_0000314g0040		Nitab4.5_0000383g0190	Nitab4.5_0000744g0150		Nitab4.5_0004862g0060	Nitab4.5_0001264g0190		Nitab4.5_0003827g0010	Nitab4.5_0001925g0060		Nitab4.5_0000305g0330	Nitab4.5_0006022g0020		Nitab4.5_0000962g0030	Nitab4.5_0012336g0020		Nitab4.5_0005733g0010	Nitab4.5_0000106g0170		Nitab4.5_0000143g0360	Nitab4.5_0003309g0070		Nitab4.5_0000278g0010	Nitab4.5_0001111g0050		Nitab4.5_0007652g0010	Nitab4.5_0001311g0110		Nitab4.5_0003512g0040	Nitab4.5_0001142g0030
Nitab4.5_0005893g0010	Nitab4.5_0004684g0020		Nitab4.5_0005808g0080	Nitab4.5_0000188g0350		Nitab4.5_0001991g0040	Nitab4.5_0001417g0010		Nitab4.5_0000288g0120	Nitab4.5_0006899g0040		Nitab4.5_0004862g0060	Nitab4.5_0006625g0020		Nitab4.5_0001565g0080	Nitab4.5_0007672g0010		Nitab4.5_0000119g0120	Nitab4.5_0000314g0050		Nitab4.5_0000419g0050	Nitab4.5_0005513g0010		Nitab4.5_0007945g0010	Nitab4.5_0001401g0120		Nitab4.5_0005390g0020	Nitab4.5_0006022g0020		Nitab4.5_0000305g0340	Nitab4.5_0006489g0040		Nitab4.5_0000742g0110	Nitab4.5_0001146g0060		Nitab4.5_0005159g0040	Nitab4.5_0000101g0110		Nitab4.5_0000143g0410	Nitab4.5_0000402g0160		Nitab4.5_0000286g0050	Nitab4.5_0003156g0110		Nitab4.5_0006392g0050	Nitab4.5_0001311g0120		Nitab4.5_0011112g0010	Nitab4.5_0006152g0030
Nitab4.5_0000827g0040	Nitab4.5_0001875g0080		Nitab4.5_0001187g0080	Nitab4.5_0013698g0010		Nitab4.5_0002590g0030	Nitab4.5_0000307g0020		Nitab4.5_0005820g0040	Nitab4.5_0010535g0010		Nitab4.5_0000713g0150	Nitab4.5_0006778g0010		Nitab4.5_0000288g0120	Nitab4.5_0004644g0020		Nitab4.5_0000119g0140	Nitab4.5_0000314g0090		Nitab4.5_0003823g0040	Nitab4.5_0008294g0020		Nitab4.5_0000036g0180	Nitab4.5_0002045g0080		Nitab4.5_0001187g0090	Nitab4.5_0000600g0130		Nitab4.5_0000337g0100	Nitab4.5_0002623g0010		Nitab4.5_0018240g0010	Nitab4.5_0000027g0190		Nitab4.5_0006843g0010	Nitab4.5_0009795g0020		Nitab4.5_0000143g0130	Nitab4.5_0001303g0060		Nitab4.5_0000102g0450	Nitab4.5_0000426g0030		Nitab4.5_0003401g0080	Nitab4.5_0011813g0010		Nitab4.5_0013262g0010	Nitab4.5_0001822g0060
Nitab4.5_0002015g0090	Nitab4.5_0000439g0010		Nitab4.5_0002764g0060	Nitab4.5_0000307g0020		Nitab4.5_0002408g0030	Nitab4.5_0000111g0050		Nitab4.5_0000383g0190	Nitab4.5_0010642g0010		Nitab4.5_0000947g0030	Nitab4.5_0007352g0010		Nitab4.5_0005820g0040	Nitab4.5_0005060g0010		Nitab4.5_0000770g0120	Nitab4.5_0000314g0100		Nitab4.5_0004969g0070	Nitab4.5_0009285g0020		Nitab4.5_0000776g0020	Nitab4.5_0003554g0020		Nitab4.5_0000670g0050	Nitab4.5_0002590g0030		Nitab4.5_0003251g0040	Nitab4.5_0000222g0200		Nitab4.5_0000441g0070	Nitab4.5_0003261g0010		Nitab4.5_0006516g0030	Nitab4.5_0000271g0320		Nitab4.5_0002679g0010	Nitab4.5_0000837g0120		Nitab4.5_0000143g0140	Nitab4.5_0002886g0120		Nitab4.5_0002120g0050	Nitab4.5_0015407g0010		Nitab4.5_0001668g0060	Nitab4.5_0000106g0430
Nitab4.5_0002161g0050	Nitab4.5_0007509g0020		Nitab4.5_0019417g0010	Nitab4.5_0002728g0070		Nitab4.5_0003215g0010	Nitab4.5_0005790g0010		Nitab4.5_0001318g0070	Nitab4.5_0001295g0210		Nitab4.5_0002231g0020	Nitab4.5_0003714g0130		Nitab4.5_0021351g0010	Nitab4.5_0001925g0060		Nitab4.5_0006543g0010	Nitab4.5_0001124g0020		Nitab4.5_0002926g0010	Nitab4.5_0001096g0030		Nitab4.5_0000947g0030	Nitab4.5_0004537g0030		Nitab4.5_0001899g0110	Nitab4.5_0006294g0080		Nitab4.5_0003401g0080	Nitab4.5_0005109g0010		Nitab4.5_0000073g0350	Nitab4.5_0001574g0130		Nitab4.5_0002865g0090	Nitab4.5_0006152g0030		Nitab4.5_0002916g0030	Nitab4.5_0006040g0020		Nitab4.5_0000161g0280	Nitab4.5_0000901g0110		Nitab4.5_0011108g0010	Nitab4.5_0000723g0150		Nitab4.5_0000699g0180	Nitab4.5_0000565g0130
Nitab4.5_0007945g0010	Nitab4.5_0026409g0010		Nitab4.5_0000031g0530	Nitab4.5_0005042g0010		Nitab4.5_0000215g0040	Nitab4.5_0008594g0010		Nitab4.5_0003823g0040	Nitab4.5_0004036g0010		Nitab4.5_0007906g0020	Nitab4.5_0003714g0140		Nitab4.5_0006526g0020	Nitab4.5_0006558g0020		Nitab4.5_0001187g0080	Nitab4.5_0004716g0010		Nitab4.5_0000218g0060	Nitab4.5_0002145g0030		Nitab4.5_0003015g0110	Nitab4.5_0005941g0010		Nitab4.5_0002097g0110	Nitab4.5_0000215g0040		Nitab4.5_0003401g0090	Nitab4.5_0004118g0110		Nitab4.5_0000604g0110	Nitab4.5_0002053g0030		Nitab4.5_0001028g0050	Nitab4.5_0015929g0010		Nitab4.5_0001812g0100	Nitab4.5_0007486g0040		Nitab4.5_0006622g0080	Nitab4.5_0008902g0010		Nitab4.5_0001255g0020	Nitab4.5_0003185g0090		Nitab4.5_0000270g0270	Nitab4.5_0001294g0010
Nitab4.5_0000540g0170	Nitab4.5_0003015g0100		Nitab4.5_0005948g0010	Nitab4.5_0006770g0060		Nitab4.5_0002525g0030	Nitab4.5_0001449g0010		Nitab4.5_0004895g0080	Nitab4.5_0005862g0060		Nitab4.5_0004189g0010	Nitab4.5_0004684g0020		Nitab4.5_0007980g0010	Nitab4.5_0000105g0210		Nitab4.5_0002764g0060	Nitab4.5_0004716g0020		Nitab4.5_0005299g0010	Nitab4.5_0003858g0030		Nitab4.5_0007428g0010	Nitab4.5_0006778g0010		Nitab4.5_0003823g0040	Nitab4.5_0002525g0030		Nitab4.5_0004556g0030	Nitab4.5_0000215g0040		Nitab4.5_0002443g0040	Nitab4.5_0008816g0020		Nitab4.5_0000770g0160	Nitab4.5_0000154g0310		Nitab4.5_0004155g0030	Nitab4.5_0000770g0120		Nitab4.5_0004937g0030	Nitab4.5_0022449g0010		Nitab4.5_0010949g0020	Nitab4.5_0000065g0030		Nitab4.5_0010662g0030	Nitab4.5_0000108g0050
Nitab4.5_0000713g0150	Nitab4.5_0000210g0110		Nitab4.5_0002071g0010	Nitab4.5_0014239g0010		Nitab4.5_0000045g0380	Nitab4.5_0000106g0170		Nitab4.5_0002926g0010	Nitab4.5_0003187g0060		Nitab4.5_0003015g0110	Nitab4.5_0001875g0080		Nitab4.5_0006343g0020	Nitab4.5_0003011g0010		Nitab4.5_0026960g0010	Nitab4.5_0001134g0090		Nitab4.5_0000215g0040	Nitab4.5_0001320g0080		Nitab4.5_0007906g0020	Nitab4.5_0010434g0040		Nitab4.5_0004895g0080	Nitab4.5_0003168g0010		Nitab4.5_0000451g0050	Nitab4.5_0002525g0030		Nitab4.5_0004920g0030	Nitab4.5_0000398g0020		Nitab4.5_0000080g0270	Nitab4.5_0004154g0040		Nitab4.5_0001320g0150	Nitab4.5_0007293g0010		Nitab4.5_0000143g0580	Nitab4.5_0000090g0090		Nitab4.5_0000451g0050	Nitab4.5_0004682g0010		Nitab4.5_0000111g0050	Nitab4.5_0000305g0330
Nitab4.5_0000938g0090	Nitab4.5_0000522g0150		Nitab4.5_0001301g0090	Nitab4.5_0007486g0040		Nitab4.5_0000345g0080	Nitab4.5_0000005g0470		Nitab4.5_0000402g0160	Nitab4.5_0011793g0010		Nitab4.5_0016451g0010	Nitab4.5_0000439g0010		Nitab4.5_0000041g0370	Nitab4.5_0003722g0010		Nitab4.5_0000499g0060	Nitab4.5_0003658g0020		Nitab4.5_0002525g0030	Nitab4.5_0001867g0070		Nitab4.5_0000102g0050	Nitab4.5_0003714g0140		Nitab4.5_0004499g0050	Nitab4.5_0013698g0010		Nitab4.5_0002020g0050	Nitab4.5_0003168g0010		Nitab4.5_0000278g0010	Nitab4.5_0004323g0010		Nitab4.5_0001449g0010	Nitab4.5_0007032g0020		Nitab4.5_0000822g0040	Nitab4.5_0000465g0060		Nitab4.5_0001438g0180	Nitab4.5_0000028g0320		Nitab4.5_0000867g0010	Nitab4.5_0001106g0070		Nitab4.5_0002177g0140	Nitab4.5_0000305g0340
Nitab4.5_0018123g0010	Nitab4.5_0000620g0190		Nitab4.5_0004445g0050	Nitab4.5_0000618g0070		Nitab4.5_0005904g0070	Nitab4.5_0014277g0010		Nitab4.5_0002008g0050	Nitab4.5_0002720g0110		Nitab4.5_0007428g0010	Nitab4.5_0007509g0020		Nitab4.5_0000670g0050	Nitab4.5_0003727g0010		Nitab4.5_0000319g0090	Nitab4.5_0001381g0120		Nitab4.5_0006516g0030	Nitab4.5_0000027g0190		Nitab4.5_0005463g0030	Nitab4.5_0004684g0020		Nitab4.5_0001780g0120	Nitab4.5_0000307g0020		Nitab4.5_0002807g0030	Nitab4.5_0001417g0010		Nitab4.5_0000286g0050	Nitab4.5_0001506g0060		Nitab4.5_0005059g0060	Nitab4.5_0007379g0030		Nitab4.5_0002355g0030	Nitab4.5_0008490g0020		Nitab4.5_0005908g0010	Nitab4.5_0006356g0040		Nitab4.5_0001565g0020	Nitab4.5_0001267g0020		Nitab4.5_0000080g0270	Nitab4.5_0013021g0030
Nitab4.5_0000036g0180	Nitab4.5_0000620g0210		Nitab4.5_0000300g0100	Nitab4.5_0001076g0030		Nitab4.5_0013698g0010	Nitab4.5_0010535g0010		Nitab4.5_0005465g0030	Nitab4.5_0008141g0010		Nitab4.5_0005463g0030	Nitab4.5_0026409g0010		Nitab4.5_0001318g0070	Nitab4.5_0013698g0010		Nitab4.5_0000319g0100	Nitab4.5_0000032g0220		Nitab4.5_0001541g0090	Nitab4.5_0020249g0010		Nitab4.5_0002100g0040	Nitab4.5_0000302g0120		Nitab4.5_0000430g0050	Nitab4.5_0002728g0070		Nitab4.5_0009102g0010	Nitab4.5_0001028g0050		Nitab4.5_0000738g0040	Nitab4.5_0000314g0090		Nitab4.5_0005729g0030	Nitab4.5_0012282g0030		Nitab4.5_0014110g0010	Nitab4.5_0000185g0250		Nitab4.5_0000814g0020	Nitab4.5_0006979g0020		Nitab4.5_0001295g0040	Nitab4.5_0000276g0060		Nitab4.5_0001449g0010	Nitab4.5_0000337g0100
Nitab4.5_0000776g0020	Nitab4.5_0003848g0030		Nitab4.5_0002656g0050	Nitab4.5_0001192g0080		Nitab4.5_0006672g0010	Nitab4.5_0010010g0020		Nitab4.5_0000215g0040	Nitab4.5_0000743g0200		Nitab4.5_0000102g0050	Nitab4.5_0002319g0040		Nitab4.5_0001899g0110	Nitab4.5_0000307g0020		Nitab4.5_0005040g0040	Nitab4.5_0006856g0030		Nitab4.5_0001195g0010	Nitab4.5_0002152g0080		Nitab4.5_0004338g0040	Nitab4.5_0000342g0140		Nitab4.5_0003309g0070	Nitab4.5_0005042g0010		Nitab4.5_0000207g0450	Nitab4.5_0000111g0050		Nitab4.5_0003244g0020	Nitab4.5_0004716g0020		Nitab4.5_0005059g0040	Nitab4.5_0001603g0020		Nitab4.5_0000167g0130	Nitab4.5_0004833g0020		Nitab4.5_0006525g0010	Nitab4.5_0008677g0030		Nitab4.5_0000143g0360	Nitab4.5_0003490g0010		Nitab4.5_0008527g0010	Nitab4.5_0003251g0040
Nitab4.5_0000947g0030	Nitab4.5_0009276g0030		Nitab4.5_0002007g0030	Nitab4.5_0001297g0050		Nitab4.5_0000119g0120	Nitab4.5_0000119g0210		Nitab4.5_0002525g0030	Nitab4.5_0008294g0020		Nitab4.5_0004338g0040	Nitab4.5_0000210g0110		Nitab4.5_0004895g0080	Nitab4.5_0002728g0070		Nitab4.5_0014067g0010	Nitab4.5_0009775g0010		Nitab4.5_0000045g0380	Nitab4.5_0000326g0330		Nitab4.5_0011186g0010	Nitab4.5_0001875g0080		Nitab4.5_0010871g0010	Nitab4.5_0006770g0060		Nitab4.5_0001039g0010	Nitab4.5_0000152g0150		Nitab4.5_0011739g0010	Nitab4.5_0000236g0010		Nitab4.5_0006203g0020	Nitab4.5_0005042g0040		Nitab4.5_0001955g0110	Nitab4.5_0007032g0020		Nitab4.5_0000572g0060	Nitab4.5_0006358g0080		Nitab4.5_0005748g0010	Nitab4.5_0001083g0130		Nitab4.5_0011108g0010	Nitab4.5_0004445g0050
Nitab4.5_0003015g0110	Nitab4.5_0000620g0200		Nitab4.5_0001403g0020	Nitab4.5_0004836g0030		Nitab4.5_0000119g0140	Nitab4.5_0000692g0170		Nitab4.5_0003168g0010	Nitab4.5_0009652g0010		Nitab4.5_0000440g0150	Nitab4.5_0000522g0150		Nitab4.5_0000430g0050	Nitab4.5_0005042g0010		Nitab4.5_0008075g0020	Nitab4.5_0006014g0050		Nitab4.5_0000345g0080	Nitab4.5_0000213g0170		Nitab4.5_0000148g0060	Nitab4.5_0000439g0010		Nitab4.5_0000104g0310	Nitab4.5_0001028g0050		Nitab4.5_0002162g0200	Nitab4.5_0005790g0010		Nitab4.5_0000288g0110	Nitab4.5_0000615g0030		Nitab4.5_0007573g0030	Nitab4.5_0001525g0020		Nitab4.5_0002466g0010	Nitab4.5_0001133g0040		Nitab4.5_0003738g0010			Nitab4.5_0002807g0030	Nitab4.5_0001913g0060		Nitab4.5_0005499g0040	Nitab4.5_0007442g0010
Nitab4.5_0007428g0010	Nitab4.5_0003110g0080		Nitab4.5_0000119g0100	Nitab4.5_0000106g0170		Nitab4.5_0000770g0120	Nitab4.5_0001988g0040		Nitab4.5_0012646g0010	Nitab4.5_0005042g0040		Nitab4.5_0000148g0060	Nitab4.5_0000620g0190		Nitab4.5_0003309g0070	Nitab4.5_0006770g0060		Nitab4.5_0000451g0050	Nitab4.5_0001730g0100		Nitab4.5_0002485g0020	Nitab4.5_0000398g0020		Nitab4.5_0008259g0010	Nitab4.5_0007509g0020		Nitab4.5_0000817g0020	Nitab4.5_0000385g0070		Nitab4.5_0005206g0010	Nitab4.5_0005059g0060		Nitab4.5_0003247g0010	Nitab4.5_0013405g0010		Nitab4.5_0009267g0020	Nitab4.5_0001957g0020		Nitab4.5_0000073g0350	Nitab4.5_0005106g0020		Nitab4.5_0000143g0260			Nitab4.5_0011407g0020	Nitab4.5_0005716g0030		Nitab4.5_0001295g0040	Nitab4.5_0000511g0060
Nitab4.5_0007906g0020	Nitab4.5_0009276g0020		Nitab4.5_0002679g0010	Nitab4.5_0000101g0110		Nitab4.5_0003207g0010	Nitab4.5_0008527g0020		Nitab4.5_0000045g0380	Nitab4.5_0000208g0220		Nitab4.5_0008259g0010	Nitab4.5_0000620g0210		Nitab4.5_0004969g0070	Nitab4.5_0001028g0050		Nitab4.5_0002786g0110	Nitab4.5_0000194g0120		Nitab4.5_0005904g0070	Nitab4.5_0001506g0060		Nitab4.5_0003265g0030	Nitab4.5_0026409g0010		Nitab4.5_0002281g0010	Nitab4.5_0000618g0070		Nitab4.5_0001955g0110	Nitab4.5_0005729g0030		Nitab4.5_0003906g0010	Nitab4.5_0001817g0010		Nitab4.5_0000540g0040	Nitab4.5_0013611g0010		Nitab4.5_0000640g0170	Nitab4.5_0009034g0010		Nitab4.5_0001013g0090			Nitab4.5_0000143g0130	Nitab4.5_0001955g0010		Nitab4.5_0000031g0400	Nitab4.5_0000420g0030
Nitab4.5_0016451g0010	Nitab4.5_0001610g0010		Nitab4.5_0000002g0360	Nitab4.5_0000101g0120		Nitab4.5_0006543g0010	Nitab4.5_0001861g0140		Nitab4.5_0000345g0080	Nitab4.5_0000021g0060		Nitab4.5_0005229g0020	Nitab4.5_0003848g0030		Nitab4.5_0006014g0010	Nitab4.5_0014239g0010		Nitab4.5_0000188g0090	Nitab4.5_0000241g0060		Nitab4.5_0010662g0030	Nitab4.5_0000314g0040		Nitab4.5_0005229g0020	Nitab4.5_0000210g0110		Nitab4.5_0005719g0010	Nitab4.5_0006152g0030		Nitab4.5_0018240g0010	Nitab4.5_0002766g0040		Nitab4.5_0004673g0030	Nitab4.5_0010117g0020		Nitab4.5_0009232g0020	Nitab4.5_0000008g0270		Nitab4.5_0000744g0050	Nitab4.5_0001200g0140		Nitab4.5_0002214g0040			Nitab4.5_0003745g0060	Nitab4.5_0001271g0010		Nitab4.5_0000795g0060	Nitab4.5_0004679g0090
Nitab4.5_0000102g0050	Nitab4.5_0004515g0010		Nitab4.5_0000922g0050	Nitab4.5_0009795g0020		Nitab4.5_0000499g0060	Nitab4.5_0005499g0040		Nitab4.5_0000414g0110	Nitab4.5_0000228g0080		Nitab4.5_0003502g0020	Nitab4.5_0004415g0010		Nitab4.5_0003242g0040	Nitab4.5_0000467g0090		Nitab4.5_0000625g0080	Nitab4.5_0002410g0020		Nitab4.5_0005100g0060	Nitab4.5_0000314g0050		Nitab4.5_0003502g0020	Nitab4.5_0000522g0150		Nitab4.5_0002042g0060	Nitab4.5_0000312g0280		Nitab4.5_0000441g0070	Nitab4.5_0000583g0150		Nitab4.5_0009383g0010	Nitab4.5_0005830g0010		Nitab4.5_0000496g0150	Nitab4.5_0000278g0030		Nitab4.5_0000933g0030	Nitab4.5_0014302g0010		Nitab4.5_0000057g0080			Nitab4.5_0007021g0010	Nitab4.5_0005796g0050		Nitab4.5_0000884g0020	Nitab4.5_0001603g0020
Nitab4.5_0005463g0030	Nitab4.5_0000008g0300		Nitab4.5_0008173g0030	Nitab4.5_0000737g0120		Nitab4.5_0000108g0050	Nitab4.5_0001580g0110		Nitab4.5_0002717g0050	Nitab4.5_0009461g0010		Nitab4.5_0001831g0100	Nitab4.5_0009276g0030		Nitab4.5_0011112g0010	Nitab4.5_0000385g0070		Nitab4.5_0000278g0030	Nitab4.5_0001474g0050		Nitab4.5_0001863g0060	Nitab4.5_0001124g0020		Nitab4.5_0001831g0100	Nitab4.5_0000620g0190		Nitab4.5_0006185g0070	Nitab4.5_0007860g0010		Nitab4.5_0003718g0010	Nitab4.5_0002289g0050		Nitab4.5_0008071g0010	Nitab4.5_0002569g0050		Nitab4.5_0013117g0010	Nitab4.5_0000278g0040		Nitab4.5_0002443g0040	Nitab4.5_0000106g0260		Nitab4.5_0004981g0050			Nitab4.5_0005579g0030	Nitab4.5_0003520g0040		Nitab4.5_0001006g0030	Nitab4.5_0011622g0010
Nitab4.5_0004338g0040	Nitab4.5_0001207g0050		Nitab4.5_0008766g0010	Nitab4.5_0006152g0030		Nitab4.5_0006392g0050	Nitab4.5_0003265g0040		Nitab4.5_0005904g0070	Nitab4.5_0000790g0050		Nitab4.5_0009327g0010	Nitab4.5_0000620g0200		Nitab4.5_0013262g0010	Nitab4.5_0007486g0040		Nitab4.5_0000604g0110	Nitab4.5_0006224g0010		Nitab4.5_0000119g0120	Nitab4.5_0011714g0010		Nitab4.5_0009327g0010	Nitab4.5_0000620g0210		Nitab4.5_0000699g0180	Nitab4.5_0009420g0030		Nitab4.5_0000073g0350	Nitab4.5_0006203g0020		Nitab4.5_0020308g0010	Nitab4.5_0012533g0010		Nitab4.5_0002700g0100	Nitab4.5_0000640g0170		Nitab4.5_0004920g0030	Nitab4.5_0000132g0500		Nitab4.5_0001088g0190			Nitab4.5_0011198g0010	Nitab4.5_0006856g0030		Nitab4.5_0000143g0360	Nitab4.5_0000167g0130
Nitab4.5_0000148g0060	Nitab4.5_0000658g0070		Nitab4.5_0002090g0040	Nitab4.5_0007860g0010		Nitab4.5_0000315g0090	Nitab4.5_0000563g0300		Nitab4.5_0008226g0010	Nitab4.5_0025276g0010		Nitab4.5_0011544g0010	Nitab4.5_0002438g0100		Nitab4.5_0002740g0010	Nitab4.5_0000618g0070		Nitab4.5_0004920g0030	Nitab4.5_0001810g0050		Nitab4.5_0000119g0140	Nitab4.5_0005617g0010		Nitab4.5_0000181g0190	Nitab4.5_0003848g0030		Nitab4.5_0002520g0120	Nitab4.5_0000342g0210		Nitab4.5_0000278g0030	Nitab4.5_0007573g0030		Nitab4.5_0001109g0080	Nitab4.5_0000083g0200		Nitab4.5_0003300g0080	Nitab4.5_0000744g0050		Nitab4.5_0000278g0010	Nitab4.5_0005283g0040		Nitab4.5_0002214g0100			Nitab4.5_0003041g0050	Nitab4.5_0013425g0030		Nitab4.5_0009374g0010	Nitab4.5_0000742g0110
Nitab4.5_0008259g0010	Nitab4.5_0004753g0050		Nitab4.5_0002587g0100	Nitab4.5_0000183g0030		Nitab4.5_0002071g0010	Nitab4.5_0006426g0010		Nitab4.5_0010662g0010	Nitab4.5_0008543g0010		Nitab4.5_0002693g0010	Nitab4.5_0003110g0080		Nitab4.5_0005733g0040	Nitab4.5_0001297g0050		Nitab4.5_0000286g0050	Nitab4.5_0000008g0670		Nitab4.5_0000770g0120	Nitab4.5_0004333g0010		Nitab4.5_0002693g0010	Nitab4.5_0009276g0030		Nitab4.5_0003215g0010	Nitab4.5_0006458g0010		Nitab4.5_0000604g0110	Nitab4.5_0009267g0020		Nitab4.5_0012894g0010	Nitab4.5_0002410g0020		Nitab4.5_0005808g0080	Nitab4.5_0002443g0040		Nitab4.5_0000286g0060	Nitab4.5_0004880g0010		Nitab4.5_0000143g0040			Nitab4.5_0000278g0030	Nitab4.5_0008536g0030		Nitab4.5_0000143g0410	Nitab4.5_0000408g0150
Nitab4.5_0003265g0030	Nitab4.5_0002415g0040		Nitab4.5_0007380g0040	Nitab4.5_0004181g0040		Nitab4.5_0000319g0270	Nitab4.5_0003624g0010		Nitab4.5_0010662g0030	Nitab4.5_0000642g0310		Nitab4.5_0014614g0010	Nitab4.5_0009276g0020		Nitab4.5_0003215g0010	Nitab4.5_0006537g0020		Nitab4.5_0000286g0060	Nitab4.5_0000900g0120		Nitab4.5_0001439g0100	Nitab4.5_0013405g0010		Nitab4.5_0014614g0010	Nitab4.5_0000620g0200		Nitab4.5_0019070g0010	Nitab4.5_0001227g0050		Nitab4.5_0000744g0050	Nitab4.5_0008490g0020		Nitab4.5_0000723g0150	Nitab4.5_0003151g0060		Nitab4.5_0005910g0010	Nitab4.5_0029531g0010		Nitab4.5_0000738g0040	Nitab4.5_0001875g0010		Nitab4.5_0006389g0020			Nitab4.5_0003981g0080	Nitab4.5_0000181g0170		Nitab4.5_0002162g0230	Nitab4.5_0001955g0110
Nitab4.5_0001571g0010	Nitab4.5_0004025g0030		Nitab4.5_0001066g0070	Nitab4.5_0004070g0030		Nitab4.5_0004475g0010	Nitab4.5_0000943g0130		Nitab4.5_0013698g0010	Nitab4.5_0000116g0390		Nitab4.5_0009025g0020	Nitab4.5_0001610g0010		Nitab4.5_0019070g0010	Nitab4.5_0003300g0080		Nitab4.5_0000738g0040	Nitab4.5_0006134g0080		Nitab4.5_0001110g0030	Nitab4.5_0000160g0110		Nitab4.5_0000296g0050	Nitab4.5_0002438g0100		Nitab4.5_0009510g0020	Nitab4.5_0000165g0100		Nitab4.5_0000933g0030	Nitab4.5_0000380g0230		Nitab4.5_0003883g0030	Nitab4.5_0000114g0140		Nitab4.5_0010556g0020	Nitab4.5_0004541g0060		Nitab4.5_0003244g0020	Nitab4.5_0000208g0300		Nitab4.5_0000143g0050			Nitab4.5_0000286g0050	Nitab4.5_0000635g0190		Nitab4.5_0009769g0010	Nitab4.5_0013611g0010
Nitab4.5_0001831g0100	Nitab4.5_0001425g0090		Nitab4.5_0014110g0010	Nitab4.5_0006089g0060		Nitab4.5_0000300g0240	Nitab4.5_0001268g0020		Nitab4.5_0001357g0030	Nitab4.5_0003806g0010		Nitab4.5_0009025g0040	Nitab4.5_0002717g0080		Nitab4.5_0009510g0020	Nitab4.5_0000312g0280		Nitab4.5_0000080g0300	Nitab4.5_0006243g0040		Nitab4.5_0002889g0050	Nitab4.5_0003309g0060		Nitab4.5_0009025g0020	Nitab4.5_0003110g0080		Nitab4.5_0000223g0090	Nitab4.5_0000565g0130		Nitab4.5_0002443g0040	Nitab4.5_0005910g0010		Nitab4.5_0002113g0140	Nitab4.5_0002212g0030		Nitab4.5_0001957g0010	Nitab4.5_0000278g0010		Nitab4.5_0000288g0110	Nitab4.5_0000564g0030		Nitab4.5_0000143g0120			Nitab4.5_0000738g0040	Nitab4.5_0000965g0090		Nitab4.5_0000143g0130	Nitab4.5_0004053g0050
Nitab4.5_0011544g0010	Nitab4.5_0004375g0030		Nitab4.5_0008560g0040	Nitab4.5_0000565g0130		Nitab4.5_0000319g0090	Nitab4.5_0003768g0010		Nitab4.5_0011455g0030	Nitab4.5_0006578g0010		Nitab4.5_0004218g0020	Nitab4.5_0003080g0050		Nitab4.5_0000319g0330	Nitab4.5_0009420g0030		Nitab4.5_0001324g0080	Nitab4.5_0002346g0010		Nitab4.5_0001467g0140	Nitab4.5_0013425g0030		Nitab4.5_0009025g0040	Nitab4.5_0009276g0020		Nitab4.5_0000244g0010	Nitab4.5_0008213g0070		Nitab4.5_0004920g0030	Nitab4.5_0013050g0010		Nitab4.5_0003995g0040	Nitab4.5_0008889g0020		Nitab4.5_0002160g0090	Nitab4.5_0003981g0080		Nitab4.5_0003247g0010	Nitab4.5_0000136g0240		Nitab4.5_0000153g0190			Nitab4.5_0000102g0450	Nitab4.5_0003626g0120		Nitab4.5_0004469g0030	Nitab4.5_0000008g0270
Nitab4.5_0002693g0010	Nitab4.5_0000325g0040		Nitab4.5_0002337g0010	Nitab4.5_0000108g0050		Nitab4.5_0000319g0100	Nitab4.5_0003768g0020		Nitab4.5_0000151g0410	Nitab4.5_0004161g0090		Nitab4.5_0000235g0130	Nitab4.5_0000642g0190		Nitab4.5_0000223g0090	Nitab4.5_0000342g0210		Nitab4.5_0001446g0050	Nitab4.5_0009281g0010		Nitab4.5_0005519g0040	Nitab4.5_0000470g0090		Nitab4.5_0000101g0440	Nitab4.5_0001610g0010		Nitab4.5_0009672g0010	Nitab4.5_0000760g0020		Nitab4.5_0000278g0010	Nitab4.5_0009425g0030		Nitab4.5_0006312g0020	Nitab4.5_0001860g0050		Nitab4.5_0009109g0060	Nitab4.5_0000286g0050		Nitab4.5_0001485g0200	Nitab4.5_0011528g0010		Nitab4.5_0002214g0120			Nitab4.5_0000880g0110	Nitab4.5_0007012g0050		Nitab4.5_0004623g0010	Nitab4.5_0000073g0350
Nitab4.5_0014614g0010	Nitab4.5_0010082g0050		Nitab4.5_0000697g0070	Nitab4.5_0006392g0050		Nitab4.5_0000319g0160	Nitab4.5_0000376g0130		Nitab4.5_0000837g0120	Nitab4.5_0000349g0330		Nitab4.5_0004529g0010	Nitab4.5_0000710g0100		Nitab4.5_0000564g0200	Nitab4.5_0000342g0220		Nitab4.5_0001739g0060	Nitab4.5_0002905g0040		Nitab4.5_0004475g0010	Nitab4.5_0008512g0010		Nitab4.5_0007360g0040	Nitab4.5_0002330g0100		Nitab4.5_0001642g0070	Nitab4.5_0000108g0050		Nitab4.5_0000574g0090	Nitab4.5_0000495g0070		Nitab4.5_0002402g0010	Nitab4.5_0000614g0100		Nitab4.5_0000109g0360	Nitab4.5_0000286g0060		Nitab4.5_0001688g0070	Nitab4.5_0003719g0050		Nitab4.5_0000143g0350			Nitab4.5_0001425g0070	Nitab4.5_0000925g0140		Nitab4.5_0011320g0020	Nitab4.5_0000278g0020
Nitab4.5_0002491g0040	Nitab4.5_0001904g0060		Nitab4.5_0000337g0070	Nitab4.5_0000305g0330		Nitab4.5_0014067g0010	Nitab4.5_0008141g0010		Nitab4.5_0000119g0120	Nitab4.5_0001911g0100		Nitab4.5_0007360g0040	Nitab4.5_0009486g0020		Nitab4.5_0000244g0010	Nitab4.5_0000183g0030		Nitab4.5_0001242g0140	Nitab4.5_0004465g0100		Nitab4.5_0000300g0240	Nitab4.5_0002209g0150		Nitab4.5_0005266g0010	Nitab4.5_0001989g0010		Nitab4.5_0000470g0050	Nitab4.5_0002367g0010		Nitab4.5_0000286g0050	Nitab4.5_0004944g0030		Nitab4.5_0001035g0010	Nitab4.5_0003796g0060		Nitab4.5_0000525g0140	Nitab4.5_0011739g0010		Nitab4.5_0003906g0010	Nitab4.5_0000625g0080		Nitab4.5_0000339g0150			Nitab4.5_0000143g0140	Nitab4.5_0000925g0060		Nitab4.5_0000382g0130	Nitab4.5_0000278g0030
Nitab4.5_0009025g0020	Nitab4.5_0000642g0190		Nitab4.5_0008037g0060	Nitab4.5_0013021g0030		Nitab4.5_0000305g0340	Nitab4.5_0001096g0030		Nitab4.5_0000119g0140	Nitab4.5_0002730g0040		Nitab4.5_0000288g0120	Nitab4.5_0006409g0050		Nitab4.5_0009672g0010	Nitab4.5_0004181g0040		Nitab4.5_0000558g0010			Nitab4.5_0000319g0090	Nitab4.5_0005250g0050		Nitab4.5_0000288g0120	Nitab4.5_0002540g0090		Nitab4.5_0002717g0050	Nitab4.5_0003431g0030		Nitab4.5_0000286g0060	Nitab4.5_0010151g0040		Nitab4.5_0002377g0030	Nitab4.5_0002456g0090		Nitab4.5_0005838g0020	Nitab4.5_0000288g0110		Nitab4.5_0019776g0010	Nitab4.5_0002772g0010		Nitab4.5_0004423g0010			Nitab4.5_0000161g0280	Nitab4.5_0005555g0010		Nitab4.5_0000598g0050	Nitab4.5_0000278g0040
Nitab4.5_0009025g0040	Nitab4.5_0009486g0020		Nitab4.5_0003465g0080	Nitab4.5_0003251g0040		Nitab4.5_0003251g0040	Nitab4.5_0002145g0030		Nitab4.5_0000770g0120	Nitab4.5_0001269g0060		Nitab4.5_0005820g0040	Nitab4.5_0001504g0090		Nitab4.5_0002654g0090	Nitab4.5_0004513g0040		Nitab4.5_0003465g0080			Nitab4.5_0000319g0100	Nitab4.5_0013083g0010		Nitab4.5_0000021g0560	Nitab4.5_0002717g0080		Nitab4.5_0004794g0010	Nitab4.5_0000525g0160		Nitab4.5_0000738g0040	Nitab4.5_0000119g0210		Nitab4.5_0009567g0010	Nitab4.5_0000688g0170		Nitab4.5_0000051g0320	Nitab4.5_0003247g0010		Nitab4.5_0011129g0030	Nitab4.5_0000397g0160		Nitab4.5_0001639g0070			Nitab4.5_0006622g0080	Nitab4.5_0000426g0030		Nitab4.5_0002732g0040	Nitab4.5_0000604g0110
Nitab4.5_0000235g0130	Nitab4.5_0001091g0070		Nitab4.5_0007109g0010	Nitab4.5_0003401g0080		Nitab4.5_0008075g0020	Nitab4.5_0001443g0010		Nitab4.5_0003207g0010	Nitab4.5_0001269g0070		Nitab4.5_0012647g0010	Nitab4.5_0009812g0030		Nitab4.5_0005120g0030	Nitab4.5_0001227g0050		Nitab4.5_0010392g0010			Nitab4.5_0000319g0160	Nitab4.5_0001280g0030		Nitab4.5_0011186g0020	Nitab4.5_0004753g0050		Nitab4.5_0010662g0010	Nitab4.5_0000305g0330		Nitab4.5_0003244g0020	Nitab4.5_0000686g0040		Nitab4.5_0003603g0040	Nitab4.5_0003308g0070		Nitab4.5_0001438g0070	Nitab4.5_0005164g0030		Nitab4.5_0000154g0250	Nitab4.5_0005642g0010		Nitab4.5_0001194g0100			Nitab4.5_0000143g0450	Nitab4.5_0001674g0010		Nitab4.5_0003106g0040	Nitab4.5_0000640g0170
Nitab4.5_0004529g0010	Nitab4.5_0006409g0050		Nitab4.5_0000332g0050	Nitab4.5_0011041g0020		Nitab4.5_0004516g0020	Nitab4.5_0005042g0040		Nitab4.5_0006543g0010	Nitab4.5_0000034g0250		Nitab4.5_0000021g0560	Nitab4.5_0003827g0010		Nitab4.5_0006516g0030	Nitab4.5_0000760g0020		Nitab4.5_0000805g0080			Nitab4.5_0000562g0100	Nitab4.5_0000194g0120		Nitab4.5_0000565g0200	Nitab4.5_0000151g0310		Nitab4.5_0013007g0030	Nitab4.5_0013021g0030		Nitab4.5_0011739g0010	Nitab4.5_0003194g0040		Nitab4.5_0000814g0020	Nitab4.5_0001816g0010		Nitab4.5_0001101g0130	Nitab4.5_0001688g0070		Nitab4.5_0000880g0110	Nitab4.5_0001841g0020		Nitab4.5_0003908g0010			Nitab4.5_0000123g0350	Nitab4.5_0005525g0060		Nitab4.5_0007021g0010	Nitab4.5_0000744g0050
Nitab4.5_0000615g0020	Nitab4.5_0000293g0100		Nitab4.5_0012494g0030	Nitab4.5_0005720g0020		Nitab4.5_0002807g0030	Nitab4.5_0000208g0220		Nitab4.5_0000465g0060	Nitab4.5_0005149g0010		Nitab4.5_0011186g0020	Nitab4.5_0002604g0010		Nitab4.5_0000874g0110	Nitab4.5_0016571g0010		Nitab4.5_0008071g0010			Nitab4.5_0011108g0010	Nitab4.5_0001461g0060		Nitab4.5_0010051g0010	Nitab4.5_0000142g0110		Nitab4.5_0001357g0030	Nitab4.5_0003251g0040		Nitab4.5_0000288g0110	Nitab4.5_0000826g0130		Nitab4.5_0001269g0060	Nitab4.5_0000110g0320		Nitab4.5_0005892g0020	Nitab4.5_0003906g0010		Nitab4.5_0004059g0070	Nitab4.5_0000845g0120		Nitab4.5_0001937g0010			Nitab4.5_0000790g0050	Nitab4.5_0000261g0060		Nitab4.5_0002450g0160	Nitab4.5_0000933g0020
Nitab4.5_0005266g0010	Nitab4.5_0007734g0030		Nitab4.5_0002811g0030	Nitab4.5_0002120g0050		Nitab4.5_0006634g0010	Nitab4.5_0000555g0100		Nitab4.5_0002366g0010	Nitab4.5_0004383g0050		Nitab4.5_0000565g0200	Nitab4.5_0000030g0450		Nitab4.5_0000045g0380	Nitab4.5_0000108g0050		Nitab4.5_0020308g0010			Nitab4.5_0000451g0050	Nitab4.5_0003811g0040		Nitab4.5_0000559g0220	Nitab4.5_0008210g0060		Nitab4.5_0004775g0010	Nitab4.5_0001213g0060		Nitab4.5_0005164g0030	Nitab4.5_0003140g0010		Nitab4.5_0001269g0070	Nitab4.5_0000874g0170		Nitab4.5_0004445g0050	Nitab4.5_0000919g0070		Nitab4.5_0004430g0110	Nitab4.5_0000025g0260		Nitab4.5_0000143g0240			Nitab4.5_0001377g0040	Nitab4.5_0001905g0040		Nitab4.5_0000199g0050	Nitab4.5_0000933g0030
Nitab4.5_0000288g0120	Nitab4.5_0006942g0010		Nitab4.5_0000009g0350	Nitab4.5_0008527g0020		Nitab4.5_0000207g0450	Nitab4.5_0011677g0020		Nitab4.5_0002150g0140	Nitab4.5_0004198g0010		Nitab4.5_0010051g0010	Nitab4.5_0001175g0170		Nitab4.5_0001461g0050	Nitab4.5_0002367g0010		Nitab4.5_0001109g0080			Nitab4.5_0008080g0020	Nitab4.5_0002722g0040		Nitab4.5_0003680g0060	Nitab4.5_0006110g0010		Nitab4.5_0011455g0030	Nitab4.5_0000826g0130		Nitab4.5_0001485g0200	Nitab4.5_0001861g0140		Nitab4.5_0012157g0030	Nitab4.5_0000231g0350		Nitab4.5_0000078g0160	Nitab4.5_0000156g0090		Nitab4.5_0006367g0030	Nitab4.5_0000156g0080		Nitab4.5_0000143g0110			Nitab4.5_0004156g0010	Nitab4.5_0001255g0070		Nitab4.5_0000437g0170	Nitab4.5_0002443g0040
Nitab4.5_0005820g0040	Nitab4.5_0004485g0020		Nitab4.5_0000074g0050	Nitab4.5_0011639g0010		Nitab4.5_0004384g0050	Nitab4.5_0001219g0080		Nitab4.5_0001829g0030	Nitab4.5_0003603g0100		Nitab4.5_0000559g0220	Nitab4.5_0006410g0010		Nitab4.5_0002717g0050	Nitab4.5_0003431g0030		Nitab4.5_0000161g0280			Nitab4.5_0000884g0020	Nitab4.5_0004332g0060		Nitab4.5_0001951g0090	Nitab4.5_0001036g0150		Nitab4.5_0003412g0030	Nitab4.5_0000885g0040		Nitab4.5_0001688g0070	Nitab4.5_0000031g0400		Nitab4.5_0002262g0160	Nitab4.5_0011330g0010		Nitab4.5_0011639g0010	Nitab4.5_0000246g0270		Nitab4.5_0000143g0140	Nitab4.5_0000188g0200		Nitab4.5_0000031g0070			Nitab4.5_0006650g0020	Nitab4.5_0006729g0030		Nitab4.5_0000556g0240	Nitab4.5_0004920g0030
Nitab4.5_0012129g0010	Nitab4.5_0009066g0010		Nitab4.5_0000118g0080	Nitab4.5_0005140g0050		Nitab4.5_0000420g0030	Nitab4.5_0000860g0060		Nitab4.5_0002889g0050	Nitab4.5_0000421g0130		Nitab4.5_0001951g0090	Nitab4.5_0013109g0010		Nitab4.5_0004794g0010	Nitab4.5_0000305g0330		Nitab4.5_0006622g0080			Nitab4.5_0007216g0010	Nitab4.5_0004332g0070		Nitab4.5_0000181g0210	Nitab4.5_0000642g0190		Nitab4.5_0002112g0150	Nitab4.5_0000469g0090		Nitab4.5_0003906g0010	Nitab4.5_0000795g0060		Nitab4.5_0006638g0030	Nitab4.5_0003114g0030		Nitab4.5_0003360g0050	Nitab4.5_0000806g0090		Nitab4.5_0006622g0080	Nitab4.5_0000569g0160		Nitab4.5_0008145g0020			Nitab4.5_0011391g0010	Nitab4.5_0000777g0100		Nitab4.5_0012789g0020	Nitab4.5_0029531g0010
Nitab4.5_0000021g0560	Nitab4.5_0009812g0030		Nitab4.5_0000470g0190	Nitab4.5_0014279g0010		Nitab4.5_0012644g0010	Nitab4.5_0001778g0140		Nitab4.5_0004112g0010	Nitab4.5_0001783g0030		Nitab4.5_0005918g0060	Nitab4.5_0007672g0010		Nitab4.5_0005904g0070	Nitab4.5_0013021g0030		Nitab4.5_0000123g0350			Nitab4.5_0001646g0050	Nitab4.5_0006560g0010		Nitab4.5_0003269g0030	Nitab4.5_0011467g0020		Nitab4.5_0000111g0050	Nitab4.5_0000884g0020		Nitab4.5_0019776g0010	Nitab4.5_0000884g0020		Nitab4.5_0007383g0010			Nitab4.5_0000143g0360	Nitab4.5_0001145g0040		Nitab4.5_0000143g0450	Nitab4.5_0000957g0130		Nitab4.5_0008712g0030			Nitab4.5_0012256g0020	Nitab4.5_0001094g0130		Nitab4.5_0001094g0010	Nitab4.5_0004541g0060
Nitab4.5_0011186g0020	Nitab4.5_0003827g0010		Nitab4.5_0000682g0040	Nitab4.5_0006272g0010		Nitab4.5_0004155g0030	Nitab4.5_0001320g0060		Nitab4.5_0000108g0050	Nitab4.5_0003848g0020		Nitab4.5_0005310g0010	Nitab4.5_0000496g0120		Nitab4.5_0008226g0010	Nitab4.5_0000337g0100		Nitab4.5_0001439g0050			Nitab4.5_0010209g0020	Nitab4.5_0001087g0070		Nitab4.5_0005918g0060	Nitab4.5_0000875g0110		Nitab4.5_0000322g0030	Nitab4.5_0011639g0010		Nitab4.5_0000080g0300	Nitab4.5_0000036g0390		Nitab4.5_0001662g0020			Nitab4.5_0009374g0010	Nitab4.5_0001311g0100		Nitab4.5_0000096g0120	Nitab4.5_0001264g0060		Nitab4.5_0000114g0140			Nitab4.5_0000446g0210	Nitab4.5_0001013g0060		Nitab4.5_0003027g0020	Nitab4.5_0000278g0010
Nitab4.5_0000565g0200	Nitab4.5_0000030g0450		Nitab4.5_0001377g0040	Nitab4.5_0000900g0050		Nitab4.5_0000822g0050	Nitab4.5_0000228g0080		Nitab4.5_0006392g0050	Nitab4.5_0004348g0050		Nitab4.5_0000420g0010	Nitab4.5_0000472g0320		Nitab4.5_0008226g0020	Nitab4.5_0003251g0040		Nitab4.5_0002188g0020			Nitab4.5_0002807g0030	Nitab4.5_0002222g0050		Nitab4.5_0005310g0010	Nitab4.5_0004485g0020		Nitab4.5_0001074g0130	Nitab4.5_0000768g0030		Nitab4.5_0000102g0450	Nitab4.5_0000093g0170		Nitab4.5_0000156g0210			Nitab4.5_0005494g0010	Nitab4.5_0001311g0120		Nitab4.5_0003139g0010	Nitab4.5_0001461g0070		Nitab4.5_0007488g0040			Nitab4.5_0000540g0320	Nitab4.5_0001565g0100		Nitab4.5_0007051g0020	Nitab4.5_0000574g0090
Nitab4.5_0010051g0010	Nitab4.5_0001175g0170		Nitab4.5_0001569g0140	Nitab4.5_0009577g0040		Nitab4.5_0000380g0160	Nitab4.5_0002538g0060		Nitab4.5_0001467g0140	Nitab4.5_0002424g0020		Nitab4.5_0001070g0130	Nitab4.5_0006014g0070		Nitab4.5_0010662g0010	Nitab4.5_0002123g0060		Nitab4.5_0002397g0040			Nitab4.5_0006634g0010	Nitab4.5_0000319g0040		Nitab4.5_0000420g0010	Nitab4.5_0009066g0010		Nitab4.5_0004325g0070	Nitab4.5_0001117g0060		Nitab4.5_0009383g0010	Nitab4.5_0000768g0030		Nitab4.5_0003307g0010			Nitab4.5_0000143g0410	Nitab4.5_0002725g0010		Nitab4.5_0005472g0090	Nitab4.5_0002725g0010		Nitab4.5_0000031g0370			Nitab4.5_0002214g0090	Nitab4.5_0007773g0010		Nitab4.5_0002710g0070	Nitab4.5_0012752g0010
Nitab4.5_0000559g0220	Nitab4.5_0013109g0010		Nitab4.5_0002188g0020	Nitab4.5_0009034g0010		Nitab4.5_0000625g0040	Nitab4.5_0006213g0050		Nitab4.5_0002170g0090	Nitab4.5_0005112g0060		Nitab4.5_0000383g0190	Nitab4.5_0000625g0120		Nitab4.5_0010662g0030	Nitab4.5_0000469g0090		Nitab4.5_0006516g0010			Nitab4.5_0000207g0450	Nitab4.5_0005555g0010		Nitab4.5_0001070g0130	Nitab4.5_0009812g0030		Nitab4.5_0000770g0120	Nitab4.5_0001337g0040		Nitab4.5_0001176g0120	Nitab4.5_0001580g0110		Nitab4.5_0003652g0010			Nitab4.5_0001337g0010	Nitab4.5_0003035g0030		Nitab4.5_0023003g0010	Nitab4.5_0003035g0030		Nitab4.5_0000884g0010			Nitab4.5_0000143g0440	Nitab4.5_0000192g0140		Nitab4.5_0000258g0140	Nitab4.5_0003981g0080
Nitab4.5_0003680g0060	Nitab4.5_0005425g0040		Nitab4.5_0003005g0010	Nitab4.5_0000063g0210		Nitab4.5_0002456g0060	Nitab4.5_0008182g0050		Nitab4.5_0000319g0090	Nitab4.5_0011908g0010		Nitab4.5_0003624g0020	Nitab4.5_0003710g0010		Nitab4.5_0013007g0030	Nitab4.5_0000078g0160		Nitab4.5_0006650g0020			Nitab4.5_0004384g0050	Nitab4.5_0000461g0280		Nitab4.5_0000383g0190	Nitab4.5_0000241g0220		Nitab4.5_0006543g0010	Nitab4.5_0005748g0010		Nitab4.5_0008071g0010	Nitab4.5_0000588g0060		Nitab4.5_0000319g0220			Nitab4.5_0009466g0030	Nitab4.5_0000341g0010		Nitab4.5_0002214g0090	Nitab4.5_0003887g0030		Nitab4.5_0000142g0340			Nitab4.5_0000143g0490	Nitab4.5_0002886g0120		Nitab4.5_0000071g0320	Nitab4.5_0000286g0050
Nitab4.5_0001951g0090	Nitab4.5_0006014g0070		Nitab4.5_0003746g0010	Nitab4.5_0006148g0020		Nitab4.5_0000147g0450	Nitab4.5_0013330g0010		Nitab4.5_0000319g0100	Nitab4.5_0003071g0080		Nitab4.5_0001984g0090	Nitab4.5_0000058g0060		Nitab4.5_0001357g0030	Nitab4.5_0011639g0010		Nitab4.5_0012894g0010			Nitab4.5_0000629g0040	Nitab4.5_0006508g0040		Nitab4.5_0000114g0120	Nitab4.5_0002604g0010		Nitab4.5_0000802g0090	Nitab4.5_0001072g0020		Nitab4.5_0020308g0010	Nitab4.5_0000228g0090		Nitab4.5_0006389g0020			Nitab4.5_0000203g0040	Nitab4.5_0000723g0150		Nitab4.5_0001244g0160	Nitab4.5_0004799g0010		Nitab4.5_0000143g0540			Nitab4.5_0001088g0130	Nitab4.5_0007379g0010		Nitab4.5_0000102g0450	Nitab4.5_0000286g0060
Nitab4.5_0003269g0030	Nitab4.5_0000625g0120		Nitab4.5_0003887g0030	Nitab4.5_0006214g0010		Nitab4.5_0001066g0070	Nitab4.5_0001244g0160		Nitab4.5_0000319g0150	Nitab4.5_0001044g0070		Nitab4.5_0007980g0010	Nitab4.5_0001098g0070		Nitab4.5_0004775g0010	Nitab4.5_0003374g0040		Nitab4.5_0000341g0010			Nitab4.5_0000686g0110	Nitab4.5_0003151g0060		Nitab4.5_0003624g0020	Nitab4.5_0000030g0450		Nitab4.5_0007293g0010	Nitab4.5_0000900g0050		Nitab4.5_0001109g0080	Nitab4.5_0000563g0300		Nitab4.5_0005256g0020			Nitab4.5_0000246g0100	Nitab4.5_0006889g0010		Nitab4.5_0015477g0010	Nitab4.5_0006692g0010		Nitab4.5_0003171g0010			Nitab4.5_0001088g0170	Nitab4.5_0001180g0020		Nitab4.5_0000880g0110	Nitab4.5_0000738g0040
Nitab4.5_0004937g0050	Nitab4.5_0000223g0350		Nitab4.5_0005344g0020	Nitab4.5_0004528g0020		Nitab4.5_0000167g0130	Nitab4.5_0015477g0010		Nitab4.5_0005040g0040	Nitab4.5_0006635g0060		Nitab4.5_0001931g0030	Nitab4.5_0000223g0350		Nitab4.5_0000483g0140	Nitab4.5_0007442g0010		Nitab4.5_0000446g0210			Nitab4.5_0001413g0040	Nitab4.5_0002168g0010		Nitab4.5_0016989g0010	Nitab4.5_0001175g0170		Nitab4.5_0000106g0180	Nitab4.5_0002340g0070		Nitab4.5_0000118g0080	Nitab4.5_0006426g0010		Nitab4.5_0002158g0140			Nitab4.5_0000831g0030	Nitab4.5_0000882g0080		Nitab4.5_0000928g0060	Nitab4.5_0007406g0020		Nitab4.5_0000008g0500			Nitab4.5_0001088g0180	Nitab4.5_0006480g0020		Nitab4.5_0009383g0010	Nitab4.5_0003244g0020
Nitab4.5_0005310g0010	Nitab4.5_0008661g0040		Nitab4.5_0005560g0040	Nitab4.5_0000167g0130		Nitab4.5_0000188g0090	Nitab4.5_0003169g0010		Nitab4.5_0000305g0330	Nitab4.5_0003309g0060		Nitab4.5_0006589g0010	Nitab4.5_0008661g0040		Nitab4.5_0003412g0030	Nitab4.5_0003624g0010		Nitab4.5_0003883g0030			Nitab4.5_0004155g0030	Nitab4.5_0000900g0110		Nitab4.5_0001984g0090	Nitab4.5_0006410g0010		Nitab4.5_0003854g0020	Nitab4.5_0009577g0040		Nitab4.5_0000532g0070	Nitab4.5_0009374g0010		Nitab4.5_0008185g0020			Nitab4.5_0002629g0100	Nitab4.5_0001310g0010		Nitab4.5_0000143g0440	Nitab4.5_0011813g0010		Nitab4.5_0001668g0090			Nitab4.5_0003571g0020	Nitab4.5_0004362g0040		Nitab4.5_0009058g0010	Nitab4.5_0011739g0010
Nitab4.5_0001924g0060	Nitab4.5_0000670g0050		Nitab4.5_0008073g0010	Nitab4.5_0005579g0030		Nitab4.5_0005707g0010	Nitab4.5_0000217g0070		Nitab4.5_0000305g0340	Nitab4.5_0005796g0050		Nitab4.5_0000306g0200	Nitab4.5_0002903g0010		Nitab4.5_0000694g0210	Nitab4.5_0011122g0010		Nitab4.5_0002887g0130			Nitab4.5_0007437g0010	Nitab4.5_0001867g0110		Nitab4.5_0000962g0100	Nitab4.5_0013109g0010		Nitab4.5_0002366g0010	Nitab4.5_0005744g0010		Nitab4.5_0002076g0070	Nitab4.5_0003813g0030		Nitab4.5_0007898g0050			Nitab4.5_0006823g0010	Nitab4.5_0001581g0080		Nitab4.5_0000143g0490	Nitab4.5_0009181g0010		Nitab4.5_0000143g0070			Nitab4.5_0004492g0010	Nitab4.5_0005076g0020		Nitab4.5_0003643g0040	Nitab4.5_0000288g0110
Nitab4.5_0000420g0010	Nitab4.5_0002098g0030		Nitab4.5_0008189g0010	Nitab4.5_0013611g0010		Nitab4.5_0011198g0010	Nitab4.5_0000259g0070		Nitab4.5_0003251g0040	Nitab4.5_0002893g0030		Nitab4.5_0002205g0010	Nitab4.5_0004626g0010		Nitab4.5_0000322g0030	Nitab4.5_0001072g0020		Nitab4.5_0002402g0010			Nitab4.5_0000414g0010	Nitab4.5_0002874g0050		Nitab4.5_0005390g0020	Nitab4.5_0000642g0210		Nitab4.5_0000839g0060	Nitab4.5_0009769g0010		Nitab4.5_0008189g0010	Nitab4.5_0001337g0010		Nitab4.5_0005913g0010			Nitab4.5_0000511g0060	Nitab4.5_0003346g0090		Nitab4.5_0001088g0170	Nitab4.5_0000838g0160		Nitab4.5_0002986g0060			Nitab4.5_0005441g0070	Nitab4.5_0003514g0040		Nitab4.5_0000143g0140	Nitab4.5_0003247g0010
Nitab4.5_0001070g0130	Nitab4.5_0005767g0010		Nitab4.5_0010289g0010	Nitab4.5_0000441g0070		Nitab4.5_0018240g0010	Nitab4.5_0000892g0020		Nitab4.5_0003401g0080	Nitab4.5_0008185g0010		Nitab4.5_0000352g0020	Nitab4.5_0000421g0030		Nitab4.5_0001074g0130	Nitab4.5_0010509g0010		Nitab4.5_0000375g0030			Nitab4.5_0002456g0060	Nitab4.5_0002604g0030		Nitab4.5_0001931g0030	Nitab4.5_0007672g0010		Nitab4.5_0001187g0080	Nitab4.5_0000511g0060		Nitab4.5_0008380g0010	Nitab4.5_0000246g0100		Nitab4.5_0006574g0010			Nitab4.5_0000143g0130	Nitab4.5_0003076g0060		Nitab4.5_0001088g0180	Nitab4.5_0000009g0170		Nitab4.5_0000515g0030			Nitab4.5_0008936g0020	Nitab4.5_0000092g0370		Nitab4.5_0006622g0080	Nitab4.5_0005164g0030
Nitab4.5_0000383g0190	Nitab4.5_0000036g0010		Nitab4.5_0010479g0010	Nitab4.5_0000008g0270		Nitab4.5_0000441g0070	Nitab4.5_0000642g0310		Nitab4.5_0004556g0030	Nitab4.5_0008303g0010		Nitab4.5_0004368g0020	Nitab4.5_0013627g0020		Nitab4.5_0001074g0140	Nitab4.5_0000900g0050		Nitab4.5_0008890g0010			Nitab4.5_0005700g0040	Nitab4.5_0000134g0030		Nitab4.5_0006589g0010	Nitab4.5_0000496g0120		Nitab4.5_0002764g0060	Nitab4.5_0018681g0010		Nitab4.5_0010215g0010	Nitab4.5_0011793g0010		Nitab4.5_0010695g0040			Nitab4.5_0000085g0220	Nitab4.5_0003490g0010		Nitab4.5_0001141g0040	Nitab4.5_0008344g0030		Nitab4.5_0006561g0040			Nitab4.5_0001059g0210	Nitab4.5_0000054g0090		Nitab4.5_0000143g0450	Nitab4.5_0002587g0030
Nitab4.5_0003624g0020	Nitab4.5_0000284g0070		Nitab4.5_0011569g0040	Nitab4.5_0000073g0350		Nitab4.5_0006281g0010	Nitab4.5_0000661g0070		Nitab4.5_0000826g0130	Nitab4.5_0002695g0070		Nitab4.5_0003203g0040	Nitab4.5_0000024g0190		Nitab4.5_0003791g0020	Nitab4.5_0002340g0070		Nitab4.5_0000470g0230			Nitab4.5_0018240g0010	Nitab4.5_0007225g0010		Nitab4.5_0000306g0200	Nitab4.5_0004644g0020		Nitab4.5_0000208g0320	Nitab4.5_0005813g0010		Nitab4.5_0012894g0010	Nitab4.5_0002162g0230		Nitab4.5_0008536g0030			Nitab4.5_0000745g0090	Nitab4.5_0000222g0170		Nitab4.5_0000143g0580	Nitab4.5_0001071g0090		Nitab4.5_0002214g0050			Nitab4.5_0001059g0230	Nitab4.5_0002465g0090		Nitab4.5_0000538g0130	Nitab4.5_0001485g0200
Nitab4.5_0014665g0010	Nitab4.5_0000651g0170		Nitab4.5_0012256g0020	Nitab4.5_0000278g0030		Nitab4.5_0000625g0080	Nitab4.5_0003806g0010		Nitab4.5_0001255g0020	Nitab4.5_0003161g0050		Nitab4.5_0002309g0070	Nitab4.5_0005767g0010		Nitab4.5_0004325g0070	Nitab4.5_0009577g0040		Nitab4.5_0003571g0020			Nitab4.5_0000441g0070	Nitab4.5_0004377g0030		Nitab4.5_0002205g0010	Nitab4.5_0000472g0320		Nitab4.5_0011368g0030	Nitab4.5_0006136g0030		Nitab4.5_0000341g0010	Nitab4.5_0005744g0010		Nitab4.5_0003738g0070			Nitab4.5_0002983g0010	Nitab4.5_0001013g0090		Nitab4.5_0002387g0090	Nitab4.5_0003346g0090		Nitab4.5_0003416g0030			Nitab4.5_0008936g0030	Nitab4.5_0004470g0040		Nitab4.5_0004280g0110	Nitab4.5_0001688g0070
Nitab4.5_0000419g0050	Nitab4.5_0000752g0030		Nitab4.5_0012894g0010	Nitab4.5_0000604g0110		Nitab4.5_0000008g0270	Nitab4.5_0002184g0030		Nitab4.5_0000451g0050	Nitab4.5_0000043g0330		Nitab4.5_0001530g0160	Nitab4.5_0000284g0070		Nitab4.5_0000151g0410	Nitab4.5_0000511g0060		Nitab4.5_0000290g0040			Nitab4.5_0029491g0010	Nitab4.5_0004377g0040		Nitab4.5_0004814g0010	Nitab4.5_0006023g0010		Nitab4.5_0000354g0170	Nitab4.5_0004155g0030		Nitab4.5_0000446g0210	Nitab4.5_0004362g0010		Nitab4.5_0000116g0080			Nitab4.5_0003180g0070	Nitab4.5_0001617g0060		Nitab4.5_0001438g0030	Nitab4.5_0000305g0140		Nitab4.5_0000143g0160			Nitab4.5_0000143g0580	Nitab4.5_0001053g0070		Nitab4.5_0000096g0120	Nitab4.5_0003906g0010
Nitab4.5_0001984g0090	Nitab4.5_0002568g0050		Nitab4.5_0023003g0010	Nitab4.5_0000640g0170		Nitab4.5_0000073g0350	Nitab4.5_0003090g0030		Nitab4.5_0000867g0010	Nitab4.5_0006523g0020		Nitab4.5_0003002g0030	Nitab4.5_0000651g0170		Nitab4.5_0000837g0120	Nitab4.5_0000461g0230		Nitab4.5_0000333g0020			Nitab4.5_0001288g0220	Nitab4.5_0006812g0030		Nitab4.5_0000352g0020	Nitab4.5_0006014g0070		Nitab4.5_0000524g0100	Nitab4.5_0006148g0020		Nitab4.5_0009181g0010	Nitab4.5_0002640g0040		Nitab4.5_0000194g0170			Nitab4.5_0007191g0020	Nitab4.5_0003581g0060		Nitab4.5_0002499g0060	Nitab4.5_0001068g0090		Nitab4.5_0000143g0310			Nitab4.5_0000577g0030	Nitab4.5_0005102g0030		Nitab4.5_0000307g0160	Nitab4.5_0019776g0010
Nitab4.5_0001990g0020	Nitab4.5_0008645g0030		Nitab4.5_0000341g0010	Nitab4.5_0000744g0050		Nitab4.5_0000278g0020	Nitab4.5_0003022g0060		Nitab4.5_0003404g0020	Nitab4.5_0007030g0010		Nitab4.5_0000041g0370	Nitab4.5_0000752g0030		Nitab4.5_0000770g0120	Nitab4.5_0004594g0120		Nitab4.5_0002377g0030			Nitab4.5_0004053g0050	Nitab4.5_0000252g0160		Nitab4.5_0004368g0020	Nitab4.5_0003710g0010		Nitab4.5_0001467g0140	Nitab4.5_0012282g0030		Nitab4.5_0000723g0150	Nitab4.5_0000863g0010		Nitab4.5_0001664g0050			Nitab4.5_0006086g0040	Nitab4.5_0001913g0060		Nitab4.5_0006525g0010	Nitab4.5_0006133g0020		Nitab4.5_0002214g0110			Nitab4.5_0001438g0030	Nitab4.5_0000090g0090		Nitab4.5_0000790g0050	Nitab4.5_0000244g0130
Nitab4.5_0012104g0010	Nitab4.5_0000993g0100		Nitab4.5_0000446g0210	Nitab4.5_0000933g0020		Nitab4.5_0000278g0030	Nitab4.5_0001637g0050		Nitab4.5_0001565g0020	Nitab4.5_0009872g0010		Nitab4.5_0001318g0070	Nitab4.5_0002568g0050		Nitab4.5_0001455g0010	Nitab4.5_0002916g0030		Nitab4.5_0004492g0010			Nitab4.5_0000625g0080	Nitab4.5_0009934g0020		Nitab4.5_0003203g0040	Nitab4.5_0000058g0060		Nitab4.5_0005948g0010	Nitab4.5_0001320g0150		Nitab4.5_0000749g0060	Nitab4.5_0001991g0010		Nitab4.5_0000111g0130			Nitab4.5_0012885g0010	Nitab4.5_0000314g0010		Nitab4.5_0003738g0010	Nitab4.5_0001915g0030		Nitab4.5_0004567g0010			Nitab4.5_0000032g0090	Nitab4.5_0000028g0320		Nitab4.5_0000806g0160	Nitab4.5_0011937g0010
Nitab4.5_0000221g0040	Nitab4.5_0001383g0030		Nitab4.5_0001301g0160	Nitab4.5_0000933g0030		Nitab4.5_0000604g0110	Nitab4.5_0001211g0320		Nitab4.5_0001006g0040	Nitab4.5_0003187g0080		Nitab4.5_0001899g0110	Nitab4.5_0008645g0030		Nitab4.5_0000106g0180	Nitab4.5_0018681g0010		Nitab4.5_0000568g0030			Nitab4.5_0000286g0050	Nitab4.5_0000147g0410		Nitab4.5_0002309g0070	Nitab4.5_0000223g0350		Nitab4.5_0004575g0040	Nitab4.5_0008496g0040		Nitab4.5_0001699g0050	Nitab4.5_0005813g0010		Nitab4.5_0000496g0130			Nitab4.5_0007821g0010	Nitab4.5_0000314g0020		Nitab4.5_0000143g0260	Nitab4.5_0003490g0010		Nitab4.5_0002055g0150			Nitab4.5_0001438g0180	Nitab4.5_0011127g0020		Nitab4.5_0002278g0080	Nitab4.5_0000156g0090
Nitab4.5_0003669g0020	Nitab4.5_0001780g0120		Nitab4.5_0012857g0010	Nitab4.5_0002443g0040		Nitab4.5_0000640g0170	Nitab4.5_0000216g0330		Nitab4.5_0001006g0050	Nitab4.5_0005780g0010		Nitab4.5_0002097g0110	Nitab4.5_0000993g0100		Nitab4.5_0001075g0020	Nitab4.5_0000476g0260		Nitab4.5_0001267g0020			Nitab4.5_0003244g0020	Nitab4.5_0002968g0060		Nitab4.5_0001530g0160	Nitab4.5_0002903g0010		Nitab4.5_0002662g0100	Nitab4.5_0001040g0040		Nitab4.5_0003418g0050	Nitab4.5_0001916g0070		Nitab4.5_0000662g0120			Nitab4.5_0000442g0250	Nitab4.5_0000314g0040		Nitab4.5_0000222g0170	Nitab4.5_0000519g0140		Nitab4.5_0000143g0510			Nitab4.5_0002499g0060	Nitab4.5_0006979g0020		Nitab4.5_0002853g0060	Nitab4.5_0000246g0270
Nitab4.5_0001931g0030	Nitab4.5_0001051g0060		Nitab4.5_0010022g0010	Nitab4.5_0004920g0030		Nitab4.5_0000933g0020	Nitab4.5_0000349g0330		Nitab4.5_0008080g0020	Nitab4.5_0004090g0050		Nitab4.5_0003823g0040	Nitab4.5_0004782g0020		Nitab4.5_0003854g0020	Nitab4.5_0010336g0040		Nitab4.5_0009567g0010			Nitab4.5_0000080g0300	Nitab4.5_0012224g0020		Nitab4.5_0000041g0370	Nitab4.5_0000421g0030		Nitab4.5_0001301g0090	Nitab4.5_0000822g0040		Nitab4.5_0004443g0040	Nitab4.5_0006998g0030		Nitab4.5_0001610g0040			Nitab4.5_0005038g0020	Nitab4.5_0000314g0050		Nitab4.5_0002214g0040	Nitab4.5_0003865g0120		Nitab4.5_0000143g0300			Nitab4.5_0000814g0020	Nitab4.5_0001585g0070		Nitab4.5_0002898g0020	Nitab4.5_0000309g0020
Nitab4.5_0006589g0010	Nitab4.5_0014618g0010		Nitab4.5_0012392g0020	Nitab4.5_0007994g0010		Nitab4.5_0000933g0030	Nitab4.5_0001911g0100		Nitab4.5_0007069g0040	Nitab4.5_0002354g0140		Nitab4.5_0004895g0080	Nitab4.5_0000926g0100		Nitab4.5_0007360g0020	Nitab4.5_0004155g0030		Nitab4.5_0005908g0010			Nitab4.5_0001446g0050	Nitab4.5_0000716g0240		Nitab4.5_0001318g0070	Nitab4.5_0002098g0030		Nitab4.5_0006278g0020	Nitab4.5_0029243g0010		Nitab4.5_0004443g0050	Nitab4.5_0005032g0020		Nitab4.5_0000228g0120			Nitab4.5_0000781g0040	Nitab4.5_0000314g0070		Nitab4.5_0001755g0060	Nitab4.5_0008438g0040		Nitab4.5_0000143g0290			Nitab4.5_0006525g0010	Nitab4.5_0000818g0010		Nitab4.5_0006391g0030	Nitab4.5_0000470g0190
Nitab4.5_0000306g0200	Nitab4.5_0011564g0010		Nitab4.5_0001894g0060	Nitab4.5_0029531g0010		Nitab4.5_0002443g0040	Nitab4.5_0001326g0130		Nitab4.5_0000151g0280	Nitab4.5_0000117g0080		Nitab4.5_0004339g0020	Nitab4.5_0000300g0180		Nitab4.5_0000305g0110	Nitab4.5_0006148g0020		Nitab4.5_0000814g0020			Nitab4.5_0002646g0030	Nitab4.5_0001790g0020		Nitab4.5_0001899g0110	Nitab4.5_0005060g0010		Nitab4.5_0001255g0020	Nitab4.5_0014383g0010		Nitab4.5_0000058g0020	Nitab4.5_0029243g0010		Nitab4.5_0000601g0040			Nitab4.5_0002090g0040	Nitab4.5_0010060g0020		Nitab4.5_0002287g0080	Nitab4.5_0001950g0060		Nitab4.5_0002214g0060			Nitab4.5_0000572g0060	Nitab4.5_0001021g0090		Nitab4.5_0006692g0010	Nitab4.5_0001145g0040
Nitab4.5_0002205g0010	Nitab4.5_0001771g0140		Nitab4.5_0005295g0010	Nitab4.5_0005728g0020		Nitab4.5_0004920g0030	Nitab4.5_0002543g0020		Nitab4.5_0001646g0050	Nitab4.5_0005323g0020		Nitab4.5_0009864g0040	Nitab4.5_0004969g0100		Nitab4.5_0004301g0080	Nitab4.5_0003154g0010		Nitab4.5_0006525g0010			Nitab4.5_0000558g0010	Nitab4.5_0002169g0090		Nitab4.5_0002060g0060	Nitab4.5_0005777g0040		Nitab4.5_0007348g0010	Nitab4.5_0001648g0030		Nitab4.5_0001817g0020	Nitab4.5_0012885g0010		Nitab4.5_0000166g0100			Nitab4.5_0002587g0100	Nitab4.5_0002039g0060		Nitab4.5_0001088g0190	Nitab4.5_0003020g0040		Nitab4.5_0000143g0420			Nitab4.5_0001269g0060	Nitab4.5_0001186g0030		Nitab4.5_0008401g0020	Nitab4.5_0001901g0010
Nitab4.5_0004368g0020	Nitab4.5_0004878g0050		Nitab4.5_0000734g0020	Nitab4.5_0000278g0010		Nitab4.5_0007994g0010	Nitab4.5_0000375g0170		Nitab4.5_0008809g0030	Nitab4.5_0000426g0030		Nitab4.5_0006992g0070	Nitab4.5_0001051g0060		Nitab4.5_0002366g0010	Nitab4.5_0012282g0030		Nitab4.5_0000032g0010			Nitab4.5_0007109g0010	Nitab4.5_0003993g0010		Nitab4.5_0003823g0040	Nitab4.5_0001961g0010		Nitab4.5_0000191g0030	Nitab4.5_0000980g0330		Nitab4.5_0006805g0010	Nitab4.5_0003537g0030		Nitab4.5_0000786g0210			Nitab4.5_0007380g0040	Nitab4.5_0006169g0040		Nitab4.5_0000192g0090	Nitab4.5_0004853g0010		Nitab4.5_0001922g0090			Nitab4.5_0001269g0070	Nitab4.5_0003178g0050		Nitab4.5_0000666g0120	Nitab4.5_0003035g0030
Nitab4.5_0003203g0040	Nitab4.5_0010408g0030		Nitab4.5_0001267g0020	Nitab4.5_0003981g0080		Nitab4.5_0000598g0020	Nitab4.5_0001105g0210		Nitab4.5_0005748g0010	Nitab4.5_0000601g0040		Nitab4.5_0000262g0060	Nitab4.5_0014618g0010		Nitab4.5_0001187g0080	Nitab4.5_0008496g0040		Nitab4.5_0005926g0020			Nitab4.5_0003643g0040	Nitab4.5_0004928g0010		Nitab4.5_0004895g0080	Nitab4.5_0001925g0060		Nitab4.5_0000451g0050	Nitab4.5_0000167g0130		Nitab4.5_0012194g0010	Nitab4.5_0000962g0030		Nitab4.5_0000786g0230			Nitab4.5_0001434g0010	Nitab4.5_0000375g0370		Nitab4.5_0001774g0060	Nitab4.5_0003726g0020		Nitab4.5_0003395g0040			Nitab4.5_0006942g0040	Nitab4.5_0007199g0010		Nitab4.5_0008720g0010	Nitab4.5_0001663g0020
Nitab4.5_0002309g0070	Nitab4.5_0003242g0040		Nitab4.5_0003822g0010	Nitab4.5_0000286g0050		Nitab4.5_0004541g0060	Nitab4.5_0002279g0110		Nitab4.5_0002807g0030	Nitab4.5_0002535g0030		Nitab4.5_0003173g0030	Nitab4.5_0011564g0010		Nitab4.5_0002764g0060	Nitab4.5_0000023g0490		Nitab4.5_0004981g0050			Nitab4.5_0009759g0010	Nitab4.5_0005180g0020		Nitab4.5_0004339g0020	Nitab4.5_0013627g0020		Nitab4.5_0000784g0030	Nitab4.5_0000165g0110		Nitab4.5_0000290g0040	Nitab4.5_0022552g0010		Nitab4.5_0004874g0010			Nitab4.5_0006586g0030	Nitab4.5_0005043g0060		Nitab4.5_0002499g0070	Nitab4.5_0001194g0010		Nitab4.5_0007124g0010			Nitab4.5_0003738g0010	Nitab4.5_0001190g0010		Nitab4.5_0004954g0010	Nitab4.5_0000882g0080
Nitab4.5_0001351g0050	Nitab4.5_0000105g0210		Nitab4.5_0010461g0020	Nitab4.5_0000286g0060		Nitab4.5_0000278g0010	Nitab4.5_0008936g0020		Nitab4.5_0006634g0010	Nitab4.5_0000461g0280		Nitab4.5_0002926g0030	Nitab4.5_0000039g0110		Nitab4.5_0000306g0170	Nitab4.5_0000175g0380		Nitab4.5_0001863g0220			Nitab4.5_0000706g0050	Nitab4.5_0001129g0010		Nitab4.5_0009864g0040	Nitab4.5_0000024g0190		Nitab4.5_0000185g0250	Nitab4.5_0001955g0110		Nitab4.5_0000333g0020	Nitab4.5_0000208g0220		Nitab4.5_0005755g0010			Nitab4.5_0004117g0060	Nitab4.5_0000505g0110		Nitab4.5_0002214g0100	Nitab4.5_0000006g0090		Nitab4.5_0001474g0010			Nitab4.5_0000143g0260	Nitab4.5_0000040g0130		Nitab4.5_0002214g0090	Nitab4.5_0004286g0050
Nitab4.5_0000041g0370	Nitab4.5_0002343g0010		Nitab4.5_0004342g0050	Nitab4.5_0000738g0040		Nitab4.5_0003264g0010	Nitab4.5_0001059g0200		Nitab4.5_0000207g0450	Nitab4.5_0006508g0040		Nitab4.5_0001816g0130	Nitab4.5_0000709g0070		Nitab4.5_0000031g0530	Nitab4.5_0000175g0480		Nitab4.5_0011475g0010			Nitab4.5_0001026g0010	Nitab4.5_0000812g0090		Nitab4.5_0000262g0060	Nitab4.5_0005767g0010		Nitab4.5_0002654g0150	Nitab4.5_0004359g0040		Nitab4.5_0000481g0010	Nitab4.5_0003280g0030		Nitab4.5_0006475g0040			Nitab4.5_0001364g0050	Nitab4.5_0000008g0060		Nitab4.5_0006511g0010	Nitab4.5_0001913g0060		Nitab4.5_0000143g0530			Nitab4.5_0001013g0090	Nitab4.5_0000573g0100		Nitab4.5_0000766g0060	Nitab4.5_0001581g0080
Nitab4.5_0001899g0110	Nitab4.5_0007274g0010		Nitab4.5_0002387g0090	Nitab4.5_0003244g0020		Nitab4.5_0000286g0050	Nitab4.5_0001059g0210		Nitab4.5_0004384g0060	Nitab4.5_0003151g0060		Nitab4.5_0001315g0060	Nitab4.5_0001771g0140		Nitab4.5_0001467g0140	Nitab4.5_0000227g0100		Nitab4.5_0001662g0020			Nitab4.5_0008071g0010	Nitab4.5_0000421g0040		Nitab4.5_0000448g0030	Nitab4.5_0002361g0220		Nitab4.5_0001933g0080	Nitab4.5_0013611g0010		Nitab4.5_0001035g0010	Nitab4.5_0001922g0050		Nitab4.5_0013906g0020			Nitab4.5_0000570g0320	Nitab4.5_0000008g0070		Nitab4.5_0003779g0090	Nitab4.5_0015960g0020		Nitab4.5_0000184g0160			Nitab4.5_0002214g0040	Nitab4.5_0001735g0060		Nitab4.5_0001068g0040	Nitab4.5_0000512g0230
Nitab4.5_0003823g0040	Nitab4.5_0001003g0150		Nitab4.5_0002216g0020	Nitab4.5_0011739g0010		Nitab4.5_0000286g0060	Nitab4.5_0001318g0020		Nitab4.5_0003745g0060	Nitab4.5_0012716g0010		Nitab4.5_0011112g0010	Nitab4.5_0004878g0050		Nitab4.5_0005948g0010	Nitab4.5_0001542g0150		Nitab4.5_0001662g0030			Nitab4.5_0020308g0010	Nitab4.5_0006975g0030		Nitab4.5_0003173g0030	Nitab4.5_0000036g0010		Nitab4.5_0003404g0020	Nitab4.5_0000978g0100		Nitab4.5_0002377g0030	Nitab4.5_0002454g0040		Nitab4.5_0006133g0030			Nitab4.5_0000880g0110	Nitab4.5_0004523g0050		Nitab4.5_0003419g0070	Nitab4.5_0000314g0010		Nitab4.5_0002214g0080			Nitab4.5_0004981g0050	Nitab4.5_0011330g0010		Nitab4.5_0001953g0130	Nitab4.5_0001728g0050
Nitab4.5_0004339g0020	Nitab4.5_0000486g0200		Nitab4.5_0002398g0060	Nitab4.5_0000288g0110		Nitab4.5_0000738g0040	Nitab4.5_0000622g0010		Nitab4.5_0000420g0030	Nitab4.5_0000513g0170		Nitab4.5_0013262g0010	Nitab4.5_0001051g0120		Nitab4.5_0000028g0050	Nitab4.5_0001689g0020		Nitab4.5_0000156g0210			Nitab4.5_0000386g0050	Nitab4.5_0000175g0390		Nitab4.5_0002926g0030	Nitab4.5_0000284g0070		Nitab4.5_0024779g0010	Nitab4.5_0002466g0010		Nitab4.5_0000009g0500	Nitab4.5_0000781g0040		Nitab4.5_0005076g0020			Nitab4.5_0000860g0060	Nitab4.5_0001854g0010		Nitab4.5_0000143g0040	Nitab4.5_0000314g0020		Nitab4.5_0000040g0600			Nitab4.5_0001088g0190	Nitab4.5_0006029g0010		Nitab4.5_0009202g0020	Nitab4.5_0009567g0010
Nitab4.5_0009864g0040	Nitab4.5_0000495g0170		Nitab4.5_0002162g0120	Nitab4.5_0003247g0010		Nitab4.5_0003244g0020	Nitab4.5_0000101g0040		Nitab4.5_0011213g0010	Nitab4.5_0001085g0060		Nitab4.5_0000326g0150	Nitab4.5_0006999g0060		Nitab4.5_0002071g0010	Nitab4.5_0002605g0020		Nitab4.5_0000073g0500			Nitab4.5_0002811g0030	Nitab4.5_0002088g0020		Nitab4.5_0003267g0100	Nitab4.5_0000651g0170		Nitab4.5_0001295g0040	Nitab4.5_0011519g0020		Nitab4.5_0003603g0040	Nitab4.5_0002090g0040		Nitab4.5_0001265g0050			Nitab4.5_0004430g0100	Nitab4.5_0004352g0010		Nitab4.5_0004422g0030	Nitab4.5_0000314g0050		Nitab4.5_0000062g0550			Nitab4.5_0011475g0010	Nitab4.5_0003353g0040		Nitab4.5_0000426g0120	Nitab4.5_0006133g0020
Nitab4.5_0000926g0140	Nitab4.5_0004024g0030		Nitab4.5_0003337g0060	Nitab4.5_0003818g0040		Nitab4.5_0011739g0010	Nitab4.5_0000084g0350		Nitab4.5_0000568g0010	Nitab4.5_0001278g0050		Nitab4.5_0005593g0010	Nitab4.5_0002343g0010		Nitab4.5_0001556g0100	Nitab4.5_0015447g0010		Nitab4.5_0000243g0070			Nitab4.5_0000161g0280	Nitab4.5_0002468g0070		Nitab4.5_0007967g0010	Nitab4.5_0000752g0030		Nitab4.5_0007429g0030	Nitab4.5_0003233g0020		Nitab4.5_0001269g0060	Nitab4.5_0008573g0060		Nitab4.5_0000092g0370			Nitab4.5_0004430g0110	Nitab4.5_0000106g0250		Nitab4.5_0000319g0220	Nitab4.5_0000314g0090		Nitab4.5_0000143g0170			Nitab4.5_0001662g0020	Nitab4.5_0000957g0170		Nitab4.5_0001998g0030	Nitab4.5_0002294g0120
Nitab4.5_0000262g0060	Nitab4.5_0000151g0120		Nitab4.5_0000476g0010	Nitab4.5_0005164g0030		Nitab4.5_0000337g0210	Nitab4.5_0001269g0060		Nitab4.5_0005283g0040	Nitab4.5_0024292g0010		Nitab4.5_0003751g0010	Nitab4.5_0001003g0150		Nitab4.5_0000754g0310	Nitab4.5_0005999g0010		Nitab4.5_0008580g0020			Nitab4.5_0006622g0080	Nitab4.5_0007687g0040		Nitab4.5_0000817g0020	Nitab4.5_0002568g0050		Nitab4.5_0001204g0020	Nitab4.5_0002093g0260		Nitab4.5_0012157g0030	Nitab4.5_0012789g0020		Nitab4.5_0006999g0030			Nitab4.5_0000151g0350	Nitab4.5_0001807g0080		Nitab4.5_0001800g0020	Nitab4.5_0004716g0010		Nitab4.5_0000425g0230			Nitab4.5_0008303g0040	Nitab4.5_0007650g0040		Nitab4.5_0002182g0090	Nitab4.5_0000183g0070
Nitab4.5_0003173g0030	Nitab4.5_0004789g0010		Nitab4.5_0000442g0190	Nitab4.5_0001485g0200		Nitab4.5_0000080g0300	Nitab4.5_0001269g0070		Nitab4.5_0001357g0020	Nitab4.5_0001383g0180		Nitab4.5_0000095g0150	Nitab4.5_0000486g0200		Nitab4.5_0002662g0100	Nitab4.5_0001665g0030		Nitab4.5_0004291g0010			Nitab4.5_0001146g0060			Nitab4.5_0002281g0010	Nitab4.5_0008645g0030		Nitab4.5_0001644g0100	Nitab4.5_0000073g0350		Nitab4.5_0001013g0090	Nitab4.5_0007459g0020		Nitab4.5_0001925g0250			Nitab4.5_0000837g0090	Nitab4.5_0001955g0010		Nitab4.5_0002700g0150	Nitab4.5_0011714g0010		Nitab4.5_0001296g0120			Nitab4.5_0011146g0010	Nitab4.5_0000037g0370		Nitab4.5_0003185g0090	Nitab4.5_0000006g0140
Nitab4.5_0002637g0040	Nitab4.5_0002042g0060		Nitab4.5_0006505g0030	Nitab4.5_0001688g0070		Nitab4.5_0001739g0060	Nitab4.5_0012157g0030		Nitab4.5_0000380g0160	Nitab4.5_0001707g0080		Nitab4.5_0000402g0160	Nitab4.5_0000495g0170		Nitab4.5_0000319g0270	Nitab4.5_0002367g0020		Nitab4.5_0012018g0010			Nitab4.5_0009018g0020			Nitab4.5_0003484g0080	Nitab4.5_0000993g0100		Nitab4.5_0002082g0010	Nitab4.5_0000278g0030		Nitab4.5_0008544g0010	Nitab4.5_0000109g0350		Nitab4.5_0000090g0090			Nitab4.5_0000495g0180	Nitab4.5_0000319g0220		Nitab4.5_0003969g0060	Nitab4.5_0000209g0020		Nitab4.5_0001296g0170			Nitab4.5_0002214g0100	Nitab4.5_0000944g0100		Nitab4.5_0004055g0010	Nitab4.5_0000486g0140
Nitab4.5_0002926g0030	Nitab4.5_0004319g0020		Nitab4.5_0010979g0010	Nitab4.5_0003906g0010		Nitab4.5_0001242g0140	Nitab4.5_0007788g0010		Nitab4.5_0000414g0010	Nitab4.5_0008247g0030		Nitab4.5_0001703g0050	Nitab4.5_0004024g0030		Nitab4.5_0001993g0060	Nitab4.5_0000132g0240		Nitab4.5_0000319g0220			Nitab4.5_0000538g0130			Nitab4.5_0000326g0150	Nitab4.5_0004782g0020		Nitab4.5_0000016g0050	Nitab4.5_0000604g0110		Nitab4.5_0006638g0030	Nitab4.5_0000312g0330		Nitab4.5_0001208g0090			Nitab4.5_0000563g0180	Nitab4.5_0000463g0020		Nitab4.5_0005133g0020	Nitab4.5_0000073g0500		Nitab4.5_0002831g0030			Nitab4.5_0000753g0140	Nitab4.5_0002340g0040		Nitab4.5_0006812g0010	Nitab4.5_0001997g0040
Nitab4.5_0007967g0010	Nitab4.5_0002119g0120		Nitab4.5_0003185g0070	Nitab4.5_0019776g0010		Nitab4.5_0000631g0020	Nitab4.5_0000398g0020		Nitab4.5_0001648g0030	Nitab4.5_0010308g0020		Nitab4.5_0007869g0030	Nitab4.5_0005719g0010		Nitab4.5_0002170g0090	Nitab4.5_0004528g0020		Nitab4.5_0001318g0050			Nitab4.5_0000086g0290			Nitab4.5_0005593g0010	Nitab4.5_0000300g0180		Nitab4.5_0000528g0010	Nitab4.5_0000640g0170		Nitab4.5_0007383g0010	Nitab4.5_0000860g0060		Nitab4.5_0001634g0060			Nitab4.5_0007060g0030	Nitab4.5_0000637g0030		Nitab4.5_0000043g0270	Nitab4.5_0000402g0010		Nitab4.5_0006170g0010			Nitab4.5_0000143g0040	Nitab4.5_0003726g0120		Nitab4.5_0012497g0030	Nitab4.5_0005382g0020
Nitab4.5_0001704g0060	Nitab4.5_0005167g0040		Nitab4.5_0001662g0020	Nitab4.5_0007852g0030		Nitab4.5_0001320g0010	Nitab4.5_0000034g0250		Nitab4.5_0000136g0240	Nitab4.5_0005250g0040		Nitab4.5_0003215g0010	Nitab4.5_0002042g0060		Nitab4.5_0008711g0020	Nitab4.5_0000167g0130		Nitab4.5_0006389g0020			Nitab4.5_0000118g0080			Nitab4.5_0007356g0030	Nitab4.5_0006022g0020		Nitab4.5_0001117g0070	Nitab4.5_0000744g0050		Nitab4.5_0011475g0010	Nitab4.5_0003417g0010		Nitab4.5_0009934g0020			Nitab4.5_0000486g0160	Nitab4.5_0000070g0240		Nitab4.5_0000143g0050	Nitab4.5_0000694g0160					Nitab4.5_0001318g0050	Nitab4.5_0013699g0030		Nitab4.5_0000143g0440	Nitab4.5_0000543g0140
Nitab4.5_0000516g0150	Nitab4.5_0001305g0030		Nitab4.5_0000156g0210	Nitab4.5_0000876g0140		Nitab4.5_0000558g0010	Nitab4.5_0004524g0060		Nitab4.5_0000188g0090	Nitab4.5_0001652g0150		Nitab4.5_0019070g0010	Nitab4.5_0002408g0030		Nitab4.5_0007099g0020	Nitab4.5_0001955g0110		Nitab4.5_0010125g0010			Nitab4.5_0000256g0030			Nitab4.5_0003751g0010	Nitab4.5_0001051g0060		Nitab4.5_0005456g0020	Nitab4.5_0002443g0040		Nitab4.5_0001662g0020	Nitab4.5_0003763g0030		Nitab4.5_0008677g0030			Nitab4.5_0003976g0070	Nitab4.5_0005256g0020		Nitab4.5_0000564g0190	Nitab4.5_0000753g0140					Nitab4.5_0006389g0020			Nitab4.5_0003951g0020	Nitab4.5_0000222g0170
Nitab4.5_0005593g0010	Nitab4.5_0003294g0020		Nitab4.5_0000636g0120	Nitab4.5_0002673g0050		Nitab4.5_0003465g0080	Nitab4.5_0007310g0010		Nitab4.5_0005707g0010	Nitab4.5_0000064g0040		Nitab4.5_0007704g0020	Nitab4.5_0001751g0160		Nitab4.5_0000319g0090	Nitab4.5_0004359g0040		Nitab4.5_0000218g0070			Nitab4.5_0000390g0030			Nitab4.5_0000095g0150	Nitab4.5_0014618g0010		Nitab4.5_0006850g0020	Nitab4.5_0004920g0030		Nitab4.5_0002495g0050	Nitab4.5_0004430g0100		Nitab4.5_0003715g0060			Nitab4.5_0001425g0070	Nitab4.5_0006095g0020		Nitab4.5_0003163g0010	Nitab4.5_0004704g0060					Nitab4.5_0002700g0150			Nitab4.5_0000143g0490	Nitab4.5_0001013g0090
Nitab4.5_0005159g0040	Nitab4.5_0000699g0180		Nitab4.5_0007542g0020	Nitab4.5_0002556g0060		Nitab4.5_0007109g0010	Nitab4.5_0000601g0110		Nitab4.5_0011198g0010	Nitab4.5_0009800g0010		Nitab4.5_0000309g0010	Nitab4.5_0000804g0180		Nitab4.5_0014067g0010	Nitab4.5_0001752g0030		Nitab4.5_0000839g0070			Nitab4.5_0000806g0160			Nitab4.5_0004795g0010	Nitab4.5_0002926g0010		Nitab4.5_0000300g0100	Nitab4.5_0000278g0010		Nitab4.5_0000156g0210	Nitab4.5_0006367g0030		Nitab4.5_0000784g0040			Nitab4.5_0006016g0010	Nitab4.5_0005881g0020		Nitab4.5_0000143g0120	Nitab4.5_0000008g0030					Nitab4.5_0000143g0050			Nitab4.5_0000661g0070	Nitab4.5_0001617g0060
Nitab4.5_0003751g0010	Nitab4.5_0000270g0270		Nitab4.5_0008120g0030	Nitab4.5_0000027g0190		Nitab4.5_0000805g0080	Nitab4.5_0003913g0020		Nitab4.5_0018240g0010	Nitab4.5_0004979g0010		Nitab4.5_0000309g0040	Nitab4.5_0001305g0030		Nitab4.5_0003888g0010	Nitab4.5_0013611g0010		Nitab4.5_0006024g0010			Nitab4.5_0000946g0010			Nitab4.5_0005786g0030	Nitab4.5_0003779g0100		Nitab4.5_0004846g0020	Nitab4.5_0000574g0090		Nitab4.5_0000209g0020	Nitab4.5_0012336g0020		Nitab4.5_0001186g0030			Nitab4.5_0000143g0140	Nitab4.5_0006073g0020		Nitab4.5_0002214g0120	Nitab4.5_0000008g0070					Nitab4.5_0001183g0090			Nitab4.5_0001959g0030	Nitab4.5_0003160g0080
Nitab4.5_0000410g0420	Nitab4.5_0021429g0010		Nitab4.5_0001234g0030	Nitab4.5_0000110g0020		Nitab4.5_0008071g0010	Nitab4.5_0007834g0030		Nitab4.5_0001288g0220	Nitab4.5_0000240g0120		Nitab4.5_0001693g0130	Nitab4.5_0001412g0010		Nitab4.5_0009819g0010	Nitab4.5_0002342g0170		Nitab4.5_0001471g0010			Nitab4.5_0001264g0060			Nitab4.5_0000402g0160	Nitab4.5_0011564g0010		Nitab4.5_0001757g0020	Nitab4.5_0012752g0010		Nitab4.5_0011146g0010	Nitab4.5_0000111g0090		Nitab4.5_0001192g0020			Nitab4.5_0000228g0080	Nitab4.5_0003377g0020		Nitab4.5_0000143g0350	Nitab4.5_0000008g0180					Nitab4.5_0000284g0040			Nitab4.5_0009774g0010	Nitab4.5_0002234g0010
Nitab4.5_0000402g0160	Nitab4.5_0009510g0020		Nitab4.5_0004037g0010	Nitab4.5_0000790g0050		Nitab4.5_0020308g0010	Nitab4.5_0006885g0010		Nitab4.5_0007051g0020	Nitab4.5_0011257g0010		Nitab4.5_0010774g0010	Nitab4.5_0003802g0020		Nitab4.5_0002234g0100	Nitab4.5_0000441g0070		Nitab4.5_0001971g0030			Nitab4.5_0001377g0040			Nitab4.5_0003215g0010	Nitab4.5_0000039g0110		Nitab4.5_0025073g0010	Nitab4.5_0003981g0080		Nitab4.5_0005784g0040	Nitab4.5_0000699g0040		Nitab4.5_0002783g0100			Nitab4.5_0006622g0080	Nitab4.5_0001271g0010		Nitab4.5_0004423g0010	Nitab4.5_0008292g0030					Nitab4.5_0001119g0070			Nitab4.5_0001088g0170	Nitab4.5_0000856g0120
Nitab4.5_0003215g0010	Nitab4.5_0007028g0040		Nitab4.5_0000015g0210	Nitab4.5_0002902g0040		Nitab4.5_0000161g0280	Nitab4.5_0003603g0100		Nitab4.5_0002772g0010	Nitab4.5_0000650g0100		Nitab4.5_0001592g0090	Nitab4.5_0007028g0040		Nitab4.5_0001301g0090	Nitab4.5_0003233g0020		Nitab4.5_0000339g0150			Nitab4.5_0001439g0050			Nitab4.5_0019070g0010	Nitab4.5_0000709g0070		Nitab4.5_0001646g0050	Nitab4.5_0000286g0050		Nitab4.5_0004905g0070	Nitab4.5_0000428g0070		Nitab4.5_0003721g0040			Nitab4.5_0000431g0260	Nitab4.5_0006398g0010		Nitab4.5_0000915g0100	Nitab4.5_0004523g0050					Nitab4.5_0001381g0120			Nitab4.5_0000070g0050	Nitab4.5_0002039g0060
Nitab4.5_0019070g0010	Nitab4.5_0002008g0050		Nitab4.5_0000673g0030	Nitab4.5_0003261g0010		Nitab4.5_0009018g0020	Nitab4.5_0000421g0130		Nitab4.5_0000008g0270	Nitab4.5_0001894g0010		Nitab4.5_0000223g0090	Nitab4.5_0002649g0010		Nitab4.5_0006278g0010	Nitab4.5_0004053g0050		Nitab4.5_0003040g0010			Nitab4.5_0001461g0070			Nitab4.5_0007704g0020	Nitab4.5_0001771g0140		Nitab4.5_0000250g0250	Nitab4.5_0000286g0060		Nitab4.5_0004699g0040	Nitab4.5_0005719g0030		Nitab4.5_0005251g0010			Nitab4.5_0002429g0080	Nitab4.5_0003309g0060		Nitab4.5_0000978g0070	Nitab4.5_0000106g0250					Nitab4.5_0000143g0120			Nitab4.5_0001326g0130	Nitab4.5_0001180g0150
Nitab4.5_0007704g0020	Nitab4.5_0000152g0170		Nitab4.5_0001962g0090	Nitab4.5_0000092g0310		Nitab4.5_0000156g0050	Nitab4.5_0011340g0010		Nitab4.5_0000278g0020	Nitab4.5_0005646g0010		Nitab4.5_0004118g0110	Nitab4.5_0002008g0050		Nitab4.5_0001241g0030	Nitab4.5_0000008g0270		Nitab4.5_0003040g0040			Nitab4.5_0001857g0030			Nitab4.5_0007338g0020	Nitab4.5_0004878g0050		Nitab4.5_0001133g0040	Nitab4.5_0000738g0040		Nitab4.5_0000319g0220	Nitab4.5_0000062g0170		Nitab4.5_0007767g0020			Nitab4.5_0005117g0010	Nitab4.5_0000306g0340		Nitab4.5_0010758g0040	Nitab4.5_0010325g0010					Nitab4.5_0000839g0070			Nitab4.5_0003274g0100	Nitab4.5_0010414g0020
Nitab4.5_0000309g0010	Nitab4.5_0001303g0060		Nitab4.5_0002439g0070	Nitab4.5_0000766g0060		Nitab4.5_0000957g0130	Nitab4.5_0001783g0030		Nitab4.5_0000278g0030	Nitab4.5_0002456g0090		Nitab4.5_0003727g0010	Nitab4.5_0000152g0170		Nitab4.5_0001933g0080	Nitab4.5_0000073g0350		Nitab4.5_0004423g0010			Nitab4.5_0002188g0020			Nitab4.5_0000309g0010	Nitab4.5_0006489g0040		Nitab4.5_0000185g0230	Nitab4.5_0011739g0010		Nitab4.5_0001318g0050	Nitab4.5_0002606g0030		Nitab4.5_0010125g0040			Nitab4.5_0005120g0020	Nitab4.5_0002755g0080		Nitab4.5_0000302g0060	Nitab4.5_0001302g0090					Nitab4.5_0002214g0120			Nitab4.5_0010547g0040	Nitab4.5_0000132g0100
Nitab4.5_0000309g0040	Nitab4.5_0000872g0070		Nitab4.5_0005771g0020	Nitab4.5_0001068g0040		Nitab4.5_0001264g0060	Nitab4.5_0004439g0100		Nitab4.5_0000604g0110	Nitab4.5_0022449g0010		Nitab4.5_0003727g0020	Nitab4.5_0001303g0060		Nitab4.5_0003404g0020	Nitab4.5_0000278g0030		Nitab4.5_0001495g0070			Nitab4.5_0002655g0060			Nitab4.5_0000309g0040	Nitab4.5_0003242g0040		Nitab4.5_0000185g0240	Nitab4.5_0000288g0110		Nitab4.5_0006389g0020	Nitab4.5_0001465g0060		Nitab4.5_0010389g0020			Nitab4.5_0005226g0010	Nitab4.5_0009131g0030		Nitab4.5_0002618g0010	Nitab4.5_0001036g0030					Nitab4.5_0000143g0350			Nitab4.5_0000375g0170	Nitab4.5_0008580g0020
Nitab4.5_0001592g0090	Nitab4.5_0000538g0040		Nitab4.5_0009965g0010	Nitab4.5_0001953g0130		Nitab4.5_0003663g0010	Nitab4.5_0000410g0310		Nitab4.5_0000640g0170	Nitab4.5_0000318g0070		Nitab4.5_0017161g0010	Nitab4.5_0003542g0100		Nitab4.5_0024779g0010	Nitab4.5_0000604g0110		Nitab4.5_0001111g0050			Nitab4.5_0004156g0010			Nitab4.5_0001592g0090	Nitab4.5_0001051g0120		Nitab4.5_0008425g0040	Nitab4.5_0003247g0010		Nitab4.5_0000463g0020	Nitab4.5_0007182g0040		Nitab4.5_0003313g0050			Nitab4.5_0011569g0040	Nitab4.5_0003885g0100		Nitab4.5_0003638g0010	Nitab4.5_0001955g0010					Nitab4.5_0000339g0150			Nitab4.5_0001059g0220	Nitab4.5_0000505g0110
Nitab4.5_0001693g0130	Nitab4.5_0009173g0010		Nitab4.5_0012222g0020	Nitab4.5_0009202g0020		Nitab4.5_0008189g0010	Nitab4.5_0004348g0050		Nitab4.5_0000744g0050	Nitab4.5_0000229g0030		Nitab4.5_0012646g0010	Nitab4.5_0000619g0080		Nitab4.5_0001295g0040	Nitab4.5_0000640g0170		Nitab4.5_0006574g0010			Nitab4.5_0004464g0010			Nitab4.5_0001693g0130	Nitab4.5_0002709g0030		Nitab4.5_0009492g0020	Nitab4.5_0005164g0030		Nitab4.5_0002700g0150	Nitab4.5_0001425g0020		Nitab4.5_0005400g0010			Nitab4.5_0008720g0010	Nitab4.5_0001111g0050		Nitab4.5_0009910g0010	Nitab4.5_0006291g0060					Nitab4.5_0001495g0130			Nitab4.5_0001105g0210	Nitab4.5_0001999g0030
Nitab4.5_0010774g0010	Nitab4.5_0008420g0020		Nitab4.5_0000588g0260	Nitab4.5_0000426g0120		Nitab4.5_0010151g0030	Nitab4.5_0005183g0090		Nitab4.5_0002443g0040	Nitab4.5_0007036g0010		Nitab4.5_0008683g0010	Nitab4.5_0000215g0040		Nitab4.5_0000031g0400	Nitab4.5_0002443g0040		Nitab4.5_0010695g0040			Nitab4.5_0006650g0020			Nitab4.5_0010774g0010	Nitab4.5_0002343g0010		Nitab4.5_0000917g0020	Nitab4.5_0001485g0200		Nitab4.5_0003969g0060	Nitab4.5_0001425g0070		Nitab4.5_0000014g0090			Nitab4.5_0002214g0090	Nitab4.5_0005359g0030		Nitab4.5_0012532g0010	Nitab4.5_0003150g0010					Nitab4.5_0004423g0010			Nitab4.5_0002279g0110	Nitab4.5_0002785g0010
Nitab4.5_0000223g0090	Nitab4.5_0002494g0020		Nitab4.5_0007028g0030	Nitab4.5_0001998g0030		Nitab4.5_0000341g0010	Nitab4.5_0006315g0010		Nitab4.5_0004920g0030	Nitab4.5_0003284g0010		Nitab4.5_0000191g0120	Nitab4.5_0002525g0030		Nitab4.5_0000884g0020	Nitab4.5_0004920g0030		Nitab4.5_0003738g0070			Nitab4.5_0008073g0010			Nitab4.5_0000223g0090	Nitab4.5_0001003g0150		Nitab4.5_0001902g0020	Nitab4.5_0001688g0070		Nitab4.5_0015114g0020	Nitab4.5_0001146g0060		Nitab4.5_0005022g0020			Nitab4.5_0000766g0060	Nitab4.5_0007792g0010		Nitab4.5_0000143g0220	Nitab4.5_0003587g0060					Nitab4.5_0003768g0030			Nitab4.5_0005441g0070	Nitab4.5_0000319g0220
Nitab4.5_0016920g0010	Nitab4.5_0000291g0040		Nitab4.5_0000713g0230	Nitab4.5_0002182g0090		Nitab4.5_0000446g0210	Nitab4.5_0013575g0010		Nitab4.5_0007994g0010	Nitab4.5_0001241g0070		Nitab4.5_0003546g0020	Nitab4.5_0000872g0070		Nitab4.5_0000164g0160	Nitab4.5_0029531g0010		Nitab4.5_0009454g0010			Nitab4.5_0008189g0010			Nitab4.5_0003727g0010	Nitab4.5_0003928g0040		Nitab4.5_0006493g0020	Nitab4.5_0003906g0010		Nitab4.5_0005256g0020	Nitab4.5_0009018g0020		Nitab4.5_0000446g0010			Nitab4.5_0001068g0040	Nitab4.5_0001721g0010		Nitab4.5_0000143g0240	Nitab4.5_0000078g0090					Nitab4.5_0003738g0070			Nitab4.5_0008936g0020	Nitab4.5_0001318g0050
Nitab4.5_0004118g0110	Nitab4.5_0002135g0070		Nitab4.5_0000642g0120	Nitab4.5_0003185g0090		Nitab4.5_0005779g0060	Nitab4.5_0002760g0020		Nitab4.5_0029531g0010	Nitab4.5_0001232g0040		Nitab4.5_0001211g0180	Nitab4.5_0006843g0010		Nitab4.5_0000576g0010	Nitab4.5_0000598g0020		Nitab4.5_0000194g0170			Nitab4.5_0010289g0010			Nitab4.5_0003727g0020	Nitab4.5_0011903g0020		Nitab4.5_0005758g0030	Nitab4.5_0019776g0010		Nitab4.5_0008522g0060	Nitab4.5_0023219g0010		Nitab4.5_0000244g0350			Nitab4.5_0008316g0020	Nitab4.5_0001629g0070		Nitab4.5_0000143g0110	Nitab4.5_0001254g0010					Nitab4.5_0002227g0010			Nitab4.5_0001059g0200	Nitab4.5_0000463g0020
Nitab4.5_0000014g0480	Nitab4.5_0002728g0070		Nitab4.5_0000033g0300	Nitab4.5_0004055g0010		Nitab4.5_0000540g0320	Nitab4.5_0010773g0010		Nitab4.5_0000278g0010	Nitab4.5_0002886g0110		Nitab4.5_0003280g0040	Nitab4.5_0000538g0040		Nitab4.5_0000606g0020	Nitab4.5_0000278g0010		Nitab4.5_0007351g0020			Nitab4.5_0012256g0020			Nitab4.5_0008683g0010	Nitab4.5_0000486g0200		Nitab4.5_0005283g0040	Nitab4.5_0000539g0080		Nitab4.5_0012489g0020	Nitab4.5_0000027g0190		Nitab4.5_0000857g0050			Nitab4.5_0000426g0120	Nitab4.5_0003837g0020		Nitab4.5_0001668g0120	Nitab4.5_0027211g0010					Nitab4.5_0002227g0020			Nitab4.5_0001059g0250	Nitab4.5_0000637g0030
Nitab4.5_0006437g0020	Nitab4.5_0005042g0010		Nitab4.5_0003040g0010	Nitab4.5_0006812g0010		Nitab4.5_0000723g0150	Nitab4.5_0000040g0610		Nitab4.5_0003981g0080	Nitab4.5_0003968g0040		Nitab4.5_0002682g0060	Nitab4.5_0001642g0070		Nitab4.5_0004846g0020	Nitab4.5_0000286g0050		Nitab4.5_0005120g0090			Nitab4.5_0012894g0010			Nitab4.5_0012646g0010	Nitab4.5_0000495g0170		Nitab4.5_0006324g0020	Nitab4.5_0003092g0060		Nitab4.5_0006852g0070	Nitab4.5_0000121g0090		Nitab4.5_0001197g0020			Nitab4.5_0002182g0090	Nitab4.5_0003837g0030		Nitab4.5_0001668g0080	Nitab4.5_0003407g0030					Nitab4.5_0009454g0010			Nitab4.5_0007486g0060	Nitab4.5_0001800g0020
Nitab4.5_0009912g0010	Nitab4.5_0006770g0060		Nitab4.5_0001817g0010	Nitab4.5_0012497g0030		Nitab4.5_0003995g0040	Nitab4.5_0001577g0060		Nitab4.5_0000286g0050	Nitab4.5_0003076g0080		Nitab4.5_0005432g0030	Nitab4.5_0003347g0030		Nitab4.5_0025073g0010	Nitab4.5_0000286g0060		Nitab4.5_0011414g0010			Nitab4.5_0000341g0010			Nitab4.5_0026486g0010	Nitab4.5_0005719g0010		Nitab4.5_0002145g0030	Nitab4.5_0000558g0010		Nitab4.5_0002158g0140	Nitab4.5_0002545g0050		Nitab4.5_0002153g0080			Nitab4.5_0011373g0010	Nitab4.5_0000194g0160		Nitab4.5_0001464g0020	Nitab4.5_0002100g0050					Nitab4.5_0002209g0150			Nitab4.5_0008936g0030	Nitab4.5_0002700g0150
Nitab4.5_0000191g0120	Nitab4.5_0002158g0070		Nitab4.5_0000744g0180	Nitab4.5_0001815g0060		Nitab4.5_0003318g0130	Nitab4.5_0006168g0020		Nitab4.5_0000286g0060	Nitab4.5_0009934g0020		Nitab4.5_0000470g0050	Nitab4.5_0000335g0110		Nitab4.5_0003813g0030	Nitab4.5_0003244g0020		Nitab4.5_0002113g0180			Nitab4.5_0000446g0210			Nitab4.5_0000045g0370	Nitab4.5_0001700g0010		Nitab4.5_0001047g0100	Nitab4.5_0004059g0070		Nitab4.5_0007028g0030	Nitab4.5_0010261g0040		Nitab4.5_0002340g0040			Nitab4.5_0000143g0440	Nitab4.5_0003151g0100		Nitab4.5_0000745g0040	Nitab4.5_0001118g0040					Nitab4.5_0013659g0010			Nitab4.5_0001925g0070	Nitab4.5_0003969g0060
Nitab4.5_0001211g0180	Nitab4.5_0004878g0040		Nitab4.5_0004718g0010	Nitab4.5_0017332g0010		Nitab4.5_0001580g0040	Nitab4.5_0001134g0090		Nitab4.5_0000738g0040	Nitab4.5_0000212g0210		Nitab4.5_0013007g0030	Nitab4.5_0009845g0010		Nitab4.5_0001646g0050	Nitab4.5_0011739g0010		Nitab4.5_0011667g0010			Nitab4.5_0000540g0320			Nitab4.5_0000014g0480	Nitab4.5_0001380g0020		Nitab4.5_0000002g0160	Nitab4.5_0006367g0030		Nitab4.5_0000249g0470	Nitab4.5_0012408g0020		Nitab4.5_0005445g0050			Nitab4.5_0000025g0180	Nitab4.5_0000635g0190		Nitab4.5_0008039g0010	Nitab4.5_0001271g0010					Nitab4.5_0001128g0050			Nitab4.5_0000143g0580	Nitab4.5_0005133g0020
Nitab4.5_0003546g0020	Nitab4.5_0011481g0010		Nitab4.5_0001422g0090	Nitab4.5_0001031g0030		Nitab4.5_0002236g0010	Nitab4.5_0001356g0110		Nitab4.5_0003244g0020	Nitab4.5_0003993g0010		Nitab4.5_0001461g0050	Nitab4.5_0006400g0010		Nitab4.5_0001133g0040	Nitab4.5_0000288g0110		Nitab4.5_0000440g0010			Nitab4.5_0003883g0030			Nitab4.5_0006437g0020	Nitab4.5_0002590g0030		Nitab4.5_0001060g0060	Nitab4.5_0004596g0010		Nitab4.5_0007898g0050	Nitab4.5_0013455g0030					Nitab4.5_0003263g0040	Nitab4.5_0011723g0010		Nitab4.5_0001585g0010	Nitab4.5_0000023g0620					Nitab4.5_0000143g0240			Nitab4.5_0005620g0040	Nitab4.5_0015114g0020
Nitab4.5_0005900g0070	Nitab4.5_0014239g0010		Nitab4.5_0009569g0010	Nitab4.5_0002887g0130		Nitab4.5_0007571g0020	Nitab4.5_0004913g0010		Nitab4.5_0011739g0010	Nitab4.5_0007531g0010		Nitab4.5_0002717g0050	Nitab4.5_0002865g0090		Nitab4.5_0001337g0010	Nitab4.5_0003247g0010		Nitab4.5_0001372g0100			Nitab4.5_0001699g0050			Nitab4.5_0000191g0120	Nitab4.5_0002408g0030		Nitab4.5_0002091g0010	Nitab4.5_0001735g0110		Nitab4.5_0003040g0010	Nitab4.5_0004937g0030					Nitab4.5_0000143g0490	Nitab4.5_0007762g0010		Nitab4.5_0002535g0030	Nitab4.5_0000604g0030					Nitab4.5_0000143g0110			Nitab4.5_0006307g0010	Nitab4.5_0000312g0130
Nitab4.5_0002682g0060	Nitab4.5_0005850g0040		Nitab4.5_0003738g0070	Nitab4.5_0002720g0030		Nitab4.5_0000423g0060	Nitab4.5_0003691g0090		Nitab4.5_0003247g0010	Nitab4.5_0001691g0170		Nitab4.5_0008226g0010	Nitab4.5_0008927g0020		Nitab4.5_0001794g0130	Nitab4.5_0005164g0030		Nitab4.5_0000412g0050			Nitab4.5_0001244g0160			Nitab4.5_0001211g0180	Nitab4.5_0007330g0030		Nitab4.5_0004880g0010	Nitab4.5_0001146g0060		Nitab4.5_0002257g0090	Nitab4.5_0008543g0010					Nitab4.5_0000661g0070	Nitab4.5_0002589g0020		Nitab4.5_0003603g0060	Nitab4.5_0001439g0060					Nitab4.5_0003815g0030			Nitab4.5_0001438g0030	Nitab4.5_0007598g0030
Nitab4.5_0005432g0030	Nitab4.5_0000819g0070		Nitab4.5_0002227g0020	Nitab4.5_0008141g0030		Nitab4.5_0002402g0010	Nitab4.5_0000380g0140		Nitab4.5_0001688g0070	Nitab4.5_0007330g0050		Nitab4.5_0008226g0020	Nitab4.5_0000307g0020		Nitab4.5_0000080g0160	Nitab4.5_0001485g0200		Nitab4.5_0001984g0010			Nitab4.5_0000363g0310			Nitab4.5_0003546g0020	Nitab4.5_0000804g0180		Nitab4.5_0000208g0300	Nitab4.5_0009018g0020		Nitab4.5_0006574g0010	Nitab4.5_0001552g0070					Nitab4.5_0001959g0030	Nitab4.5_0002730g0050		Nitab4.5_0002168g0010	Nitab4.5_0001381g0120					Nitab4.5_0000498g0010			Nitab4.5_0001438g0180	Nitab4.5_0000070g0240
Nitab4.5_0000470g0050	Nitab4.5_0000928g0100		Nitab4.5_0003322g0030	Nitab4.5_0000059g0240		Nitab4.5_0002584g0030	Nitab4.5_0000738g0100		Nitab4.5_0003906g0010	Nitab4.5_0002650g0030		Nitab4.5_0010662g0010	Nitab4.5_0002728g0070		Nitab4.5_0000185g0230	Nitab4.5_0001688g0070		Nitab4.5_0010993g0020			Nitab4.5_0003995g0040			Nitab4.5_0005900g0070	Nitab4.5_0000864g0140		Nitab4.5_0000564g0030	Nitab4.5_0000027g0190		Nitab4.5_0010695g0040	Nitab4.5_0008720g0010					Nitab4.5_0002723g0040	Nitab4.5_0001331g0110		Nitab4.5_0010789g0020	Nitab4.5_0001781g0220					Nitab4.5_0000498g0040			Nitab4.5_0002499g0060	Nitab4.5_0005256g0020
Nitab4.5_0001461g0050	Nitab4.5_0002249g0080		Nitab4.5_0001928g0020	Nitab4.5_0006860g0020		Nitab4.5_0007495g0030	Nitab4.5_0000634g0200		Nitab4.5_0000080g0300	Nitab4.5_0003513g0010		Nitab4.5_0004794g0010	Nitab4.5_0005042g0010		Nitab4.5_0000185g0240	Nitab4.5_0003906g0010		Nitab4.5_0000655g0030			Nitab4.5_0014534g0010			Nitab4.5_0003280g0040	Nitab4.5_0010439g0030		Nitab4.5_0001918g0040	Nitab4.5_0002742g0040		Nitab4.5_0002329g0140	Nitab4.5_0010237g0040					Nitab4.5_0009774g0010	Nitab4.5_0002113g0180		Nitab4.5_0001918g0080	Nitab4.5_0001176g0080					Nitab4.5_0000070g0110			Nitab4.5_0000572g0120	Nitab4.5_0008522g0060
Nitab4.5_0002717g0050	Nitab4.5_0000118g0120		Nitab4.5_0000302g0060	Nitab4.5_0000065g0030		Nitab4.5_0023116g0010	Nitab4.5_0000287g0190		Nitab4.5_0002646g0030	Nitab4.5_0027851g0010		Nitab4.5_0010662g0020	Nitab4.5_0006770g0060		Nitab4.5_0008425g0040	Nitab4.5_0019776g0010		Nitab4.5_0001170g0160			Nitab4.5_0001580g0040			Nitab4.5_0002682g0060	Nitab4.5_0000270g0270		Nitab4.5_0001696g0070	Nitab4.5_0004164g0040		Nitab4.5_0003738g0070	Nitab4.5_0006179g0050					Nitab4.5_0016973g0010	Nitab4.5_0011667g0010		Nitab4.5_0000837g0030	Nitab4.5_0003040g0010					Nitab4.5_0001256g0080			Nitab4.5_0000084g0380	Nitab4.5_0012489g0020
Nitab4.5_0004794g0010	Nitab4.5_0005023g0050		Nitab4.5_0001721g0010	Nitab4.5_0002394g0010		Nitab4.5_0002577g0030	Nitab4.5_0000063g0110		Nitab4.5_0004673g0030			Nitab4.5_0010662g0030	Nitab4.5_0004878g0040		Nitab4.5_0000119g0100	Nitab4.5_0000337g0210		Nitab4.5_0008145g0020			Nitab4.5_0006312g0020			Nitab4.5_0005432g0030	Nitab4.5_0021429g0010		Nitab4.5_0001159g0090	Nitab4.5_0006650g0020		Nitab4.5_0000681g0150	Nitab4.5_0013459g0010					Nitab4.5_0000015g0020	Nitab4.5_0004551g0030		Nitab4.5_0024070g0010	Nitab4.5_0000130g0050					Nitab4.5_0008145g0020			Nitab4.5_0000572g0060	Nitab4.5_0006360g0010
Nitab4.5_0005904g0070	Nitab4.5_0000841g0070		Nitab4.5_0002027g0120	Nitab4.5_0000375g0170		Nitab4.5_0000375g0030	Nitab4.5_0001109g0110		Nitab4.5_0001320g0010			Nitab4.5_0000382g0090	Nitab4.5_0001374g0220		Nitab4.5_0000310g0190	Nitab4.5_0000222g0380		Nitab4.5_0000228g0120			Nitab4.5_0001581g0010			Nitab4.5_0000470g0050	Nitab4.5_0001412g0010		Nitab4.5_0002700g0120	Nitab4.5_0010395g0010		Nitab4.5_0000791g0130	Nitab4.5_0001244g0160					Nitab4.5_0001088g0130	Nitab4.5_0000297g0130		Nitab4.5_0004301g0060	Nitab4.5_0001111g0050					Nitab4.5_0000324g0160			Nitab4.5_0000572g0110	Nitab4.5_0006852g0070
Nitab4.5_0008226g0010	Nitab4.5_0008594g0010		Nitab4.5_0005180g0040	Nitab4.5_0001105g0210		Nitab4.5_0001817g0020	Nitab4.5_0000716g0210		Nitab4.5_0000558g0010			Nitab4.5_0003773g0050	Nitab4.5_0011481g0010		Nitab4.5_0003745g0060	Nitab4.5_0004059g0070		Nitab4.5_0001292g0050			Nitab4.5_0000105g0060			Nitab4.5_0002717g0050	Nitab4.5_0009510g0020		Nitab4.5_0008962g0050	Nitab4.5_0009202g0020		Nitab4.5_0000194g0170	Nitab4.5_0015477g0010					Nitab4.5_0005295g0010	Nitab4.5_0001070g0120		Nitab4.5_0008538g0010	Nitab4.5_0006650g0010					Nitab4.5_0002969g0010			Nitab4.5_0001269g0060	Nitab4.5_0005648g0020
Nitab4.5_0008226g0020	Nitab4.5_0002600g0010		Nitab4.5_0002618g0010	Nitab4.5_0005441g0070		Nitab4.5_0005061g0040	Nitab4.5_0011491g0020		Nitab4.5_0003465g0080			Nitab4.5_0000030g0350	Nitab4.5_0014239g0010		Nitab4.5_0000863g0010	Nitab4.5_0004430g0110		Nitab4.5_0000352g0110			Nitab4.5_0001823g0070			Nitab4.5_0004794g0010	Nitab4.5_0000319g0330		Nitab4.5_0000188g0090	Nitab4.5_0000426g0120		Nitab4.5_0001664g0050	Nitab4.5_0000138g0150					Nitab4.5_0000192g0120	Nitab4.5_0000437g0070		Nitab4.5_0010603g0030	Nitab4.5_0010117g0020					Nitab4.5_0009844g0020			Nitab4.5_0012157g0030	Nitab4.5_0000078g0090
Nitab4.5_0010662g0010	Nitab4.5_0000132g0510		Nitab4.5_0009910g0010	Nitab4.5_0008936g0020		Nitab4.5_0008890g0010	Nitab4.5_0000502g0160		Nitab4.5_0007109g0010			Nitab4.5_0000985g0020	Nitab4.5_0005850g0040		Nitab4.5_0001902g0020	Nitab4.5_0000386g0250		Nitab4.5_0001456g0050			Nitab4.5_0004443g0040			Nitab4.5_0008226g0010	Nitab4.5_0007028g0040		Nitab4.5_0002337g0010	Nitab4.5_0001998g0030		Nitab4.5_0008553g0010	Nitab4.5_0001441g0010					Nitab4.5_0001267g0020	Nitab4.5_0007689g0040		Nitab4.5_0007488g0040	Nitab4.5_0015984g0010					Nitab4.5_0008712g0030			Nitab4.5_0001428g0010	Nitab4.5_0000257g0150
Nitab4.5_0010662g0020	Nitab4.5_0003520g0050		Nitab4.5_0002220g0060	Nitab4.5_0001059g0200		Nitab4.5_0000734g0020	Nitab4.5_0000403g0130		Nitab4.5_0001236g0010			Nitab4.5_0013698g0010	Nitab4.5_0000263g0080		Nitab4.5_0011970g0010	Nitab4.5_0000207g0310		Nitab4.5_0000786g0220			Nitab4.5_0000044g0100			Nitab4.5_0010662g0010	Nitab4.5_0000152g0170		Nitab4.5_0011198g0010	Nitab4.5_0002182g0090		Nitab4.5_0000111g0130	Nitab4.5_0001231g0030					Nitab4.5_0000375g0170	Nitab4.5_0009844g0020		Nitab4.5_0000566g0210	Nitab4.5_0000213g0030					Nitab4.5_0000837g0030			Nitab4.5_0008816g0020	Nitab4.5_0000764g0020
Nitab4.5_0010662g0030	Nitab4.5_0001898g0010		Nitab4.5_0001925g0140	Nitab4.5_0001059g0230		Nitab4.5_0000734g0030	Nitab4.5_0004422g0060		Nitab4.5_0002719g0120			Nitab4.5_0007089g0030	Nitab4.5_0000819g0070		Nitab4.5_0005470g0010	Nitab4.5_0001320g0080		Nitab4.5_0007512g0030			Nitab4.5_0007571g0020			Nitab4.5_0000382g0090	Nitab4.5_0001303g0060		Nitab4.5_0000697g0070	Nitab4.5_0003185g0090		Nitab4.5_0000309g0080	Nitab4.5_0000707g0240					Nitab4.5_0001105g0210	Nitab4.5_0000426g0030		Nitab4.5_0000457g0080	Nitab4.5_0002569g0050					Nitab4.5_0000982g0120			Nitab4.5_0000143g0260	Nitab4.5_0006398g0010
Nitab4.5_0013007g0030	Nitab4.5_0009744g0010		Nitab4.5_0001651g0020	Nitab4.5_0007486g0060		Nitab4.5_0006805g0010	Nitab4.5_0001401g0130		Nitab4.5_0001176g0120			Nitab4.5_0000021g0280	Nitab4.5_0002249g0080		Nitab4.5_0000201g0190	Nitab4.5_0001735g0110		Nitab4.5_0001132g0010			Nitab4.5_0000600g0080			Nitab4.5_0003773g0050	Nitab4.5_0000147g0330		Nitab4.5_0005597g0040	Nitab4.5_0006812g0010		Nitab4.5_0003794g0090	Nitab4.5_0000568g0020					Nitab4.5_0002279g0110	Nitab4.5_0001816g0190		Nitab4.5_0002214g0030	Nitab4.5_0007351g0020					Nitab4.5_0000114g0140			Nitab4.5_0002214g0040	Nitab4.5_0007026g0060
Nitab4.5_0000382g0090	Nitab4.5_0006040g0020		Nitab4.5_0000925g0140	Nitab4.5_0008936g0030		Nitab4.5_0009888g0030	Nitab4.5_0000185g0120		Nitab4.5_0020308g0010			Nitab4.5_0001843g0100	Nitab4.5_0000118g0120		Nitab4.5_0007302g0010	Nitab4.5_0005135g0030		Nitab4.5_0000905g0050			Nitab4.5_0002271g0010			Nitab4.5_0000030g0350	Nitab4.5_0000215g0040		Nitab4.5_0000337g0070	Nitab4.5_0012497g0030		Nitab4.5_0006691g0030	Nitab4.5_0007586g0020					Nitab4.5_0001059g0200	Nitab4.5_0004003g0010		Nitab4.5_0007712g0010	Nitab4.5_0003151g0100					Nitab4.5_0004123g0030			Nitab4.5_0008220g0010	Nitab4.5_0003127g0040
Nitab4.5_0003773g0050	Nitab4.5_0000522g0220		Nitab4.5_0003531g0060	Nitab4.5_0001925g0070		Nitab4.5_0000470g0230	Nitab4.5_0008185g0020		Nitab4.5_0000161g0280			Nitab4.5_0002015g0070	Nitab4.5_0000495g0090		Nitab4.5_0001413g0040	Nitab4.5_0000935g0020		Nitab4.5_0000614g0070			Nitab4.5_0002402g0010			Nitab4.5_0000985g0020	Nitab4.5_0002525g0030		Nitab4.5_0000022g0230	Nitab4.5_0000263g0090		Nitab4.5_0001557g0030	Nitab4.5_0000414g0080					Nitab4.5_0000143g0580	Nitab4.5_0000214g0010		Nitab4.5_0000482g0170	Nitab4.5_0000635g0190					Nitab4.5_0001477g0070			Nitab4.5_0001401g0060	Nitab4.5_0003309g0060
Nitab4.5_0000030g0350	Nitab4.5_0001084g0050		Nitab4.5_0001584g0050	Nitab4.5_0001315g0310		Nitab4.5_0003571g0020	Nitab4.5_0002322g0090		Nitab4.5_0009018g0020			Nitab4.5_0004862g0070	Nitab4.5_0002009g0030		Nitab4.5_0005758g0030	Nitab4.5_0000850g0040		Nitab4.5_0006419g0010			Nitab4.5_0002584g0030			Nitab4.5_0013698g0010	Nitab4.5_0003168g0010		Nitab4.5_0000547g0010	Nitab4.5_0000928g0060		Nitab4.5_0000068g0400	Nitab4.5_0002011g0060					Nitab4.5_0000316g0090	Nitab4.5_0011634g0010		Nitab4.5_0013816g0010	Nitab4.5_0001243g0040					Nitab4.5_0003771g0010			Nitab4.5_0001088g0190	Nitab4.5_0000359g0070
Nitab4.5_0000985g0020	Nitab4.5_0000770g0120		Nitab4.5_0004160g0030	Nitab4.5_0002955g0040		Nitab4.5_0001004g0220	Nitab4.5_0000550g0100		Nitab4.5_0000256g0030			Nitab4.5_0000483g0140	Nitab4.5_0008594g0010		Nitab4.5_0006001g0010	Nitab4.5_0000027g0190		Nitab4.5_0000786g0210			Nitab4.5_0002577g0030			Nitab4.5_0000158g0100	Nitab4.5_0000872g0070		Nitab4.5_0000416g0140	Nitab4.5_0007776g0010		Nitab4.5_0000649g0090	Nitab4.5_0003563g0020					Nitab4.5_0000577g0030	Nitab4.5_0000263g0180		Nitab4.5_0000376g0090	Nitab4.5_0000034g0110					Nitab4.5_0007488g0040			Nitab4.5_0001167g0030	Nitab4.5_0006856g0030
Nitab4.5_0000021g0280	Nitab4.5_0006543g0010		Nitab4.5_0009844g0020	Nitab4.5_0000451g0150		Nitab4.5_0000280g0010	Nitab4.5_0008303g0010		Nitab4.5_0000390g0030			Nitab4.5_0003412g0030	Nitab4.5_0000132g0510		Nitab4.5_0012979g0010	Nitab4.5_0003261g0010		Nitab4.5_0000786g0240			Nitab4.5_0000734g0020			Nitab4.5_0000021g0280	Nitab4.5_0006843g0010		Nitab4.5_0006180g0020	Nitab4.5_0007776g0020		Nitab4.5_0001019g0020	Nitab4.5_0003563g0050					Nitab4.5_0005620g0040	Nitab4.5_0008568g0030		Nitab4.5_0001684g0020	Nitab4.5_0001830g0040					Nitab4.5_0001668g0100			Nitab4.5_0001899g0070	Nitab4.5_0006454g0010
Nitab4.5_0001028g0050	Nitab4.5_0000604g0120		Nitab4.5_0002567g0050	Nitab4.5_0002481g0040		Nitab4.5_0000333g0020	Nitab4.5_0004509g0030		Nitab4.5_0000946g0010			Nitab4.5_0001074g0130	Nitab4.5_0003520g0050		Nitab4.5_0005283g0040	Nitab4.5_0001699g0050		Nitab4.5_0004874g0010			Nitab4.5_0000734g0030			Nitab4.5_0000483g0140	Nitab4.5_0000538g0040		Nitab4.5_0007767g0010	Nitab4.5_0004240g0010		Nitab4.5_0001966g0010	Nitab4.5_0001574g0130					Nitab4.5_0004320g0030	Nitab4.5_0000007g0230		Nitab4.5_0000143g0400	Nitab4.5_0003321g0030					Nitab4.5_0009733g0010			Nitab4.5_0000192g0090	Nitab4.5_0001111g0050
Nitab4.5_0000483g0140	Nitab4.5_0007293g0010		Nitab4.5_0000294g0070	Nitab4.5_0009785g0010		Nitab4.5_0001035g0010	Nitab4.5_0002018g0020		Nitab4.5_0000957g0130			Nitab4.5_0001365g0080	Nitab4.5_0001898g0010		Nitab4.5_0002815g0150	Nitab4.5_0007540g0050		Nitab4.5_0005755g0010			Nitab4.5_0006805g0010			Nitab4.5_0001843g0100	Nitab4.5_0002744g0010		Nitab4.5_0000625g0080	Nitab4.5_0000755g0110		Nitab4.5_0002163g0070	Nitab4.5_0003263g0040					Nitab4.5_0009174g0010	Nitab4.5_0002345g0080		Nitab4.5_0004183g0010	Nitab4.5_0000556g0040					Nitab4.5_0000614g0070			Nitab4.5_0001114g0010	Nitab4.5_0006650g0010
Nitab4.5_0001843g0100	Nitab4.5_0000766g0050		Nitab4.5_0001202g0030	Nitab4.5_0001269g0060		Nitab4.5_0002377g0030	Nitab4.5_0002796g0020		Nitab4.5_0001264g0060			Nitab4.5_0001467g0100	Nitab4.5_0000182g0010		Nitab4.5_0006324g0020	Nitab4.5_0000783g0240		Nitab4.5_0005755g0020			Nitab4.5_0009888g0030			Nitab4.5_0002015g0070	Nitab4.5_0001178g0010		Nitab4.5_0002772g0010	Nitab4.5_0003912g0060		Nitab4.5_0008039g0010	Nitab4.5_0010166g0030					Nitab4.5_0001701g0170	Nitab4.5_0006475g0040		Nitab4.5_0000914g0300	Nitab4.5_0004993g0020					Nitab4.5_0000143g0400			Nitab4.5_0002214g0100	Nitab4.5_0000744g0180
Nitab4.5_0002015g0070	Nitab4.5_0001068g0010		Nitab4.5_0002067g0010	Nitab4.5_0001269g0070		Nitab4.5_0004492g0010	Nitab4.5_0007963g0040		Nitab4.5_0001377g0040			Nitab4.5_0007782g0030	Nitab4.5_0009744g0010		Nitab4.5_0001916g0070	Nitab4.5_0000766g0060		Nitab4.5_0007987g0010			Nitab4.5_0012194g0010			Nitab4.5_0003412g0030	Nitab4.5_0004276g0010		Nitab4.5_0000397g0160	Nitab4.5_0001815g0060		Nitab4.5_0000496g0130	Nitab4.5_0001633g0030					Nitab4.5_0000101g0040	Nitab4.5_0000101g0240		Nitab4.5_0001041g0060	Nitab4.5_0000540g0020					Nitab4.5_0004183g0010			Nitab4.5_0014508g0010	Nitab4.5_0007792g0010
Nitab4.5_0003412g0030	Nitab4.5_0001076g0030		Nitab4.5_0003603g0060	Nitab4.5_0012157g0030		Nitab4.5_0000568g0030	Nitab4.5_0001044g0050		Nitab4.5_0001439g0050			Nitab4.5_0003474g0010	Nitab4.5_0012294g0050		Nitab4.5_0002596g0030	Nitab4.5_0001068g0040		Nitab4.5_0001423g0140			Nitab4.5_0000470g0230			Nitab4.5_0001074g0140	Nitab4.5_0003347g0030		Nitab4.5_0000008g0240	Nitab4.5_0017332g0010		Nitab4.5_0013076g0020	Nitab4.5_0000105g0060					Nitab4.5_0001569g0130	Nitab4.5_0000152g0040		Nitab4.5_0000143g0540	Nitab4.5_0009145g0020					Nitab4.5_0000143g0540			Nitab4.5_0011758g0010	Nitab4.5_0000797g0130
Nitab4.5_0004862g0070	Nitab4.5_0001192g0080		Nitab4.5_0000227g0150	Nitab4.5_0001390g0020		Nitab4.5_0001267g0020	Nitab4.5_0002209g0150		Nitab4.5_0001461g0070			Nitab4.5_0002904g0090	Nitab4.5_0006040g0020		Nitab4.5_0003998g0030	Nitab4.5_0001953g0130		Nitab4.5_0001102g0050			Nitab4.5_0003571g0020			Nitab4.5_0001322g0020	Nitab4.5_0007023g0010		Nitab4.5_0003264g0010	Nitab4.5_0000725g0080		Nitab4.5_0000291g0030	Nitab4.5_0016973g0010					Nitab4.5_0001856g0070	Nitab4.5_0000007g0210		Nitab4.5_0004119g0040	Nitab4.5_0002321g0060					Nitab4.5_0003171g0010			Nitab4.5_0000143g0040	Nitab4.5_0000246g0300
Nitab4.5_0001074g0130	Nitab4.5_0001297g0050		Nitab4.5_0004629g0030	Nitab4.5_0003738g0010		Nitab4.5_0003822g0010	Nitab4.5_0001542g0020		Nitab4.5_0001842g0110			Nitab4.5_0004562g0010	Nitab4.5_0000522g0220		Nitab4.5_0001060g0060	Nitab4.5_0009202g0020		Nitab4.5_0000142g0340			Nitab4.5_0001083g0010			Nitab4.5_0007871g0010	Nitab4.5_0000335g0110		Nitab4.5_0001324g0080	Nitab4.5_0002456g0190		Nitab4.5_0000786g0220	Nitab4.5_0000122g0120					Nitab4.5_0003094g0030	Nitab4.5_0007254g0040		Nitab4.5_0000926g0120	Nitab4.5_0001070g0120					Nitab4.5_0007254g0040			Nitab4.5_0004037g0010	Nitab4.5_0001239g0050
Nitab4.5_0001074g0140	Nitab4.5_0001381g0190		Nitab4.5_0001477g0070	Nitab4.5_0001013g0090		Nitab4.5_0005487g0010	Nitab4.5_0006963g0050		Nitab4.5_0001857g0030			Nitab4.5_0005947g0020	Nitab4.5_0001084g0050		Nitab4.5_0009493g0010	Nitab4.5_0000283g0040		Nitab4.5_0001099g0060			Nitab4.5_0001035g0010			Nitab4.5_0009785g0060	Nitab4.5_0008420g0020		Nitab4.5_0001739g0060	Nitab4.5_0001574g0130		Nitab4.5_0006861g0010	Nitab4.5_0001233g0010					Nitab4.5_0003815g0080	Nitab4.5_0000174g0230		Nitab4.5_0006696g0020	Nitab4.5_0004469g0090					Nitab4.5_0000143g0070			Nitab4.5_0004304g0070	Nitab4.5_0006969g0040
Nitab4.5_0006701g0020	Nitab4.5_0003043g0010		Nitab4.5_0005845g0030	Nitab4.5_0001617g0060		Nitab4.5_0009567g0010	Nitab4.5_0004673g0060		Nitab4.5_0002188g0020			Nitab4.5_0000306g0010	Nitab4.5_0000604g0120		Nitab4.5_0011622g0010	Nitab4.5_0000980g0050		Nitab4.5_0000775g0160			Nitab4.5_0002377g0030			Nitab4.5_0001365g0080	Nitab4.5_0006400g0010		Nitab4.5_0001242g0140	Nitab4.5_0000247g0020		Nitab4.5_0022581g0010	Nitab4.5_0003090g0030					Nitab4.5_0001438g0030	Nitab4.5_0000072g0040		Nitab4.5_0012046g0010	Nitab4.5_0007689g0040					Nitab4.5_0002177g0170			Nitab4.5_0000143g0050	Nitab4.5_0003156g0110
Nitab4.5_0009103g0010	Nitab4.5_0004836g0030		Nitab4.5_0001544g0040	Nitab4.5_0006885g0010		Nitab4.5_0001548g0010	Nitab4.5_0000194g0120		Nitab4.5_0002725g0010			Nitab4.5_0004881g0080	Nitab4.5_0001494g0060		Nitab4.5_0000208g0300	Nitab4.5_0000008g0350		Nitab4.5_0001041g0060			Nitab4.5_0004492g0010			Nitab4.5_0001467g0100	Nitab4.5_0000691g0140		Nitab4.5_0004673g0030	Nitab4.5_0001310g0010		Nitab4.5_0010299g0030	Nitab4.5_0003022g0060					Nitab4.5_0007162g0020	Nitab4.5_0009349g0020		Nitab4.5_0001668g0090	Nitab4.5_0008372g0010					Nitab4.5_0001438g0020			Nitab4.5_0003249g0020	Nitab4.5_0000791g0130
Nitab4.5_0000770g0160	Nitab4.5_0006090g0020		Nitab4.5_0010777g0020	Nitab4.5_0003603g0100		Nitab4.5_0005082g0020	Nitab4.5_0000807g0160		Nitab4.5_0005472g0090			Nitab4.5_0001304g0080	Nitab4.5_0011082g0010		Nitab4.5_0000170g0200	Nitab4.5_0000426g0120		Nitab4.5_0005076g0020			Nitab4.5_0011801g0020			Nitab4.5_0007782g0030	Nitab4.5_0003927g0050		Nitab4.5_0006022g0010	Nitab4.5_0002723g0040		Nitab4.5_0000166g0100	Nitab4.5_0003110g0130					Nitab4.5_0001438g0180	Nitab4.5_0006999g0030		Nitab4.5_0000143g0070	Nitab4.5_0012102g0010					Nitab4.5_0003796g0060			Nitab4.5_0000559g0230	Nitab4.5_0000201g0250
Nitab4.5_0005100g0060	Nitab4.5_0006985g0020		Nitab4.5_0001383g0170	Nitab4.5_0000072g0300		Nitab4.5_0000814g0020	Nitab4.5_0007327g0030		Nitab4.5_0006650g0020			Nitab4.5_0000013g0080	Nitab4.5_0007293g0010		Nitab4.5_0000351g0040	Nitab4.5_0001998g0030		Nitab4.5_0001657g0020			Nitab4.5_0009567g0010			Nitab4.5_0003474g0010	Nitab4.5_0000291g0040		Nitab4.5_0003741g0010	Nitab4.5_0001233g0010		Nitab4.5_0007712g0010	Nitab4.5_0000216g0330					Nitab4.5_0002499g0060	Nitab4.5_0001586g0090		Nitab4.5_0003173g0060	Nitab4.5_0003289g0010					Nitab4.5_0002986g0060			Nitab4.5_0000588g0260	Nitab4.5_0000194g0170
Nitab4.5_0007871g0010	Nitab4.5_0011193g0010		Nitab4.5_0001780g0050	Nitab4.5_0000314g0010		Nitab4.5_0006525g0010	Nitab4.5_0004426g0010		Nitab4.5_0008189g0010			Nitab4.5_0000643g0080	Nitab4.5_0000766g0050		Nitab4.5_0001315g0070	Nitab4.5_0002152g0080		Nitab4.5_0000515g0030			Nitab4.5_0002783g0010			Nitab4.5_0002904g0090	Nitab4.5_0002865g0090		Nitab4.5_0008037g0060	Nitab4.5_0003912g0040		Nitab4.5_0000786g0210	Nitab4.5_0000375g0210					Nitab4.5_0000572g0120	Nitab4.5_0000350g0030		Nitab4.5_0001438g0020	Nitab4.5_0005525g0060					Nitab4.5_0000900g0120			Nitab4.5_0000185g0120	Nitab4.5_0007351g0020
Nitab4.5_0009785g0060	Nitab4.5_0011578g0040		Nitab4.5_0014760g0010	Nitab4.5_0000314g0100		Nitab4.5_0000585g0010	Nitab4.5_0004653g0030		Nitab4.5_0010289g0010			Nitab4.5_0007944g0010	Nitab4.5_0001068g0010		Nitab4.5_0007343g0030	Nitab4.5_0002182g0090		Nitab4.5_0011952g0010			Nitab4.5_0000009g0310			Nitab4.5_0004562g0010	Nitab4.5_0003089g0010		Nitab4.5_0002865g0120	Nitab4.5_0004620g0030		Nitab4.5_0000786g0230	Nitab4.5_0000512g0170					Nitab4.5_0000084g0380	Nitab4.5_0007480g0050		Nitab4.5_0002118g0020	Nitab4.5_0003151g0060					Nitab4.5_0002214g0050			Nitab4.5_0002214g0140	Nitab4.5_0002771g0040
Nitab4.5_0000495g0090	Nitab4.5_0022765g0010		Nitab4.5_0000998g0040	Nitab4.5_0004716g0010		Nitab4.5_0010037g0030	Nitab4.5_0003337g0070		Nitab4.5_0011391g0010			Nitab4.5_0000151g0410	Nitab4.5_0001076g0030		Nitab4.5_0001696g0070	Nitab4.5_0003185g0090		Nitab4.5_0004990g0010			Nitab4.5_0008054g0020			Nitab4.5_0005947g0020	Nitab4.5_0000307g0020		Nitab4.5_0003434g0090	Nitab4.5_0012667g0020		Nitab4.5_0000786g0240	Nitab4.5_0002526g0030					Nitab4.5_0000572g0060	Nitab4.5_0006680g0010		Nitab4.5_0002986g0060	Nitab4.5_0001265g0010					Nitab4.5_0006134g0080			Nitab4.5_0000143g0120	Nitab4.5_0009973g0020
Nitab4.5_0001365g0080	Nitab4.5_0000106g0170		Nitab4.5_0002465g0030	Nitab4.5_0010060g0020		Nitab4.5_0000222g0170	Nitab4.5_0000511g0080		Nitab4.5_0012256g0020			Nitab4.5_0008256g0020	Nitab4.5_0001297g0050		Nitab4.5_0000296g0090	Nitab4.5_0004055g0010		Nitab4.5_0000143g0160			Nitab4.5_0000101g0040			Nitab4.5_0000306g0010	Nitab4.5_0005042g0010		Nitab4.5_0005583g0040	Nitab4.5_0000014g0240		Nitab4.5_0001921g0030	Nitab4.5_0000463g0150					Nitab4.5_0000572g0110	Nitab4.5_0000001g0060		Nitab4.5_0000054g0100	Nitab4.5_0001896g0050					Nitab4.5_0012157g0020			Nitab4.5_0002893g0030	Nitab4.5_0011667g0010
Nitab4.5_0001467g0100	Nitab4.5_0000181g0120		Nitab4.5_0000166g0100	Nitab4.5_0000236g0010		Nitab4.5_0001013g0090	Nitab4.5_0000003g0680		Nitab4.5_0012894g0010			Nitab4.5_0025145g0010	Nitab4.5_0001381g0190		Nitab4.5_0001238g0050	Nitab4.5_0006812g0010		Nitab4.5_0003626g0040			Nitab4.5_0005150g0070			Nitab4.5_0002889g0070	Nitab4.5_0006770g0060		Nitab4.5_0000102g0450	Nitab4.5_0000488g0080		Nitab4.5_0004874g0010	Nitab4.5_0001603g0030					Nitab4.5_0001428g0010	Nitab4.5_0000343g0050		Nitab4.5_0000143g0190	Nitab4.5_0022581g0010					Nitab4.5_0000143g0480			Nitab4.5_0002214g0120	Nitab4.5_0000769g0140
Nitab4.5_0007782g0030	Nitab4.5_0000650g0260		Nitab4.5_0007254g0050	Nitab4.5_0010414g0020		Nitab4.5_0000057g0080	Nitab4.5_0000069g0330		Nitab4.5_0000316g0350			Nitab4.5_0000771g0070	Nitab4.5_0002289g0050		Nitab4.5_0001159g0090	Nitab4.5_0012497g0030		Nitab4.5_0001004g0170			Nitab4.5_0002398g0060			Nitab4.5_0004881g0080	Nitab4.5_0000525g0250		Nitab4.5_0000880g0110	Nitab4.5_0000651g0010		Nitab4.5_0005755g0010	Nitab4.5_0005252g0010					Nitab4.5_0000143g0260	Nitab4.5_0002302g0020		Nitab4.5_0002214g0050	Nitab4.5_0000652g0100					Nitab4.5_0003308g0070			Nitab4.5_0000143g0350	Nitab4.5_0017504g0010
Nitab4.5_0011394g0020	Nitab4.5_0001615g0140		Nitab4.5_0001423g0140	Nitab4.5_0005043g0060		Nitab4.5_0003073g0090	Nitab4.5_0002354g0140		Nitab4.5_0000341g0010			Nitab4.5_0003379g0100	Nitab4.5_0003043g0010		Nitab4.5_0003618g0090	Nitab4.5_0000117g0020		Nitab4.5_0001812g0040			Nitab4.5_0000814g0020			Nitab4.5_0000044g0360	Nitab4.5_0001418g0050		Nitab4.5_0000994g0050	Nitab4.5_0003259g0090		Nitab4.5_0005755g0020	Nitab4.5_0001059g0200					Nitab4.5_0000669g0220	Nitab4.5_0006356g0040		Nitab4.5_0003906g0030	Nitab4.5_0002823g0100					Nitab4.5_0000143g0160			Nitab4.5_0004342g0010	Nitab4.5_0002948g0070
Nitab4.5_0002904g0090	Nitab4.5_0004108g0020		Nitab4.5_0001702g0210	Nitab4.5_0000505g0110		Nitab4.5_0004981g0050	Nitab4.5_0005754g0040		Nitab4.5_0000446g0210			Nitab4.5_0005052g0040	Nitab4.5_0004836g0030		Nitab4.5_0005313g0010	Nitab4.5_0000928g0060		Nitab4.5_0011467g0030			Nitab4.5_0006525g0010			Nitab4.5_0003591g0010	Nitab4.5_0011481g0010		Nitab4.5_0009383g0010	Nitab4.5_0000451g0150		Nitab4.5_0002345g0080	Nitab4.5_0000009g0310					Nitab4.5_0002214g0040	Nitab4.5_0011802g0020		Nitab4.5_0001196g0090	Nitab4.5_0001143g0020					Nitab4.5_0000705g0050			Nitab4.5_0000339g0150	Nitab4.5_0008145g0020
Nitab4.5_0004562g0010	Nitab4.5_0004314g0010		Nitab4.5_0002275g0100	Nitab4.5_0009820g0020		Nitab4.5_0006638g0030	Nitab4.5_0002874g0070		Nitab4.5_0005779g0060			Nitab4.5_0000119g0140	Nitab4.5_0006090g0020		Nitab4.5_0002337g0010	Nitab4.5_0007776g0010		Nitab4.5_0012494g0040			Nitab4.5_0001950g0060			Nitab4.5_0001304g0080	Nitab4.5_0000111g0050		Nitab4.5_0005642g0010	Nitab4.5_0000814g0020		Nitab4.5_0006475g0040	Nitab4.5_0000316g0090					Nitab4.5_0005149g0010	Nitab4.5_0002974g0010		Nitab4.5_0000499g0140	Nitab4.5_0000026g0140					Nitab4.5_0000143g0060			Nitab4.5_0002338g0020	Nitab4.5_0000245g0060
Nitab4.5_0005947g0020	Nitab4.5_0000101g0110		Nitab4.5_0000142g0340	Nitab4.5_0002715g0110		Nitab4.5_0000650g0250	Nitab4.5_0000155g0090		Nitab4.5_0000540g0320			Nitab4.5_0003207g0010	Nitab4.5_0006203g0020		Nitab4.5_0005707g0010	Nitab4.5_0007776g0020		Nitab4.5_0007439g0020			Nitab4.5_0010037g0030			Nitab4.5_0000013g0080	Nitab4.5_0005790g0010		Nitab4.5_0003465g0080	Nitab4.5_0006525g0010		Nitab4.5_0001041g0060	Nitab4.5_0000649g0240					Nitab4.5_0000706g0110	Nitab4.5_0000244g0300		Nitab4.5_0004472g0020	Nitab4.5_0006348g0010					Nitab4.5_0001525g0030			Nitab4.5_0005830g0010	Nitab4.5_0007689g0040
Nitab4.5_0000306g0010	Nitab4.5_0009795g0010		Nitab4.5_0008441g0030	Nitab4.5_0000294g0140		Nitab4.5_0011475g0010	Nitab4.5_0004841g0050		Nitab4.5_0006433g0050			Nitab4.5_0000119g0120	Nitab4.5_0006985g0020		Nitab4.5_0011198g0010	Nitab4.5_0004240g0030		Nitab4.5_0000102g0300			Nitab4.5_0004771g0040			Nitab4.5_0000151g0410	Nitab4.5_0000775g0030		Nitab4.5_0007109g0010	Nitab4.5_0000667g0190		Nitab4.5_0000901g0110	Nitab4.5_0000649g0260					Nitab4.5_0002304g0070	Nitab4.5_0002780g0020		Nitab4.5_0002001g0010	Nitab4.5_0000741g0040					Nitab4.5_0000143g0310			Nitab4.5_0001639g0070	Nitab4.5_0001523g0010
Nitab4.5_0004881g0080	Nitab4.5_0009795g0020		Nitab4.5_0003171g0010	Nitab4.5_0000319g0220		Nitab4.5_0002807g0040	Nitab4.5_0000712g0270		Nitab4.5_0000058g0150			Nitab4.5_0000519g0250	Nitab4.5_0011193g0010		Nitab4.5_0000697g0070	Nitab4.5_0001815g0060		Nitab4.5_0003694g0060			Nitab4.5_0000034g0250			Nitab4.5_0000643g0080	Nitab4.5_0006837g0030		Nitab4.5_0000151g0350	Nitab4.5_0001279g0030		Nitab4.5_0002298g0090	Nitab4.5_0005620g0050					Nitab4.5_0003117g0060	Nitab4.5_0000116g0120		Nitab4.5_0000881g0120	Nitab4.5_0004295g0020					Nitab4.5_0002214g0110			Nitab4.5_0000185g0130	Nitab4.5_0009844g0020
Nitab4.5_0001304g0080	Nitab4.5_0000271g0320		Nitab4.5_0007254g0040	Nitab4.5_0001318g0050		Nitab4.5_0001662g0020	Nitab4.5_0000712g0280		Nitab4.5_0001699g0050			Nitab4.5_0002172g0100	Nitab4.5_0011578g0040		Nitab4.5_0000337g0070	Nitab4.5_0001885g0040		Nitab4.5_0005232g0070			Nitab4.5_0005382g0020			Nitab4.5_0007944g0010	Nitab4.5_0005850g0040		Nitab4.5_0000075g0010	Nitab4.5_0008816g0020		Nitab4.5_0001531g0020	Nitab4.5_0006307g0010					Nitab4.5_0007527g0010	Nitab4.5_0000302g0100		Nitab4.5_0000143g0480	Nitab4.5_0007769g0010					Nitab4.5_0001438g0090			Nitab4.5_0003908g0010	Nitab4.5_0002465g0040
Nitab4.5_0000013g0080	Nitab4.5_0004602g0010		Nitab4.5_0001313g0010	Nitab4.5_0006389g0020		Nitab4.5_0001662g0030	Nitab4.5_0006367g0020		Nitab4.5_0003995g0040			Nitab4.5_0001641g0010	Nitab4.5_0022765g0010		Nitab4.5_0000022g0210	Nitab4.5_0017332g0010		Nitab4.5_0000077g0100			Nitab4.5_0005135g0010			Nitab4.5_0008256g0020	Nitab4.5_0000819g0070		Nitab4.5_0001815g0070	Nitab4.5_0001013g0090		Nitab4.5_0000722g0020	Nitab4.5_0000513g0110					Nitab4.5_0000108g0260	Nitab4.5_0001361g0050		Nitab4.5_0000143g0160	Nitab4.5_0001329g0040					Nitab4.5_0002055g0150			Nitab4.5_0003209g0030	Nitab4.5_0001157g0040
Nitab4.5_0000151g0410	Nitab4.5_0013395g0010		Nitab4.5_0001789g0130	Nitab4.5_0000463g0020		Nitab4.5_0000156g0210	Nitab4.5_0008372g0010		Nitab4.5_0001580g0040			Nitab4.5_0003930g0020	Nitab4.5_0000106g0170		Nitab4.5_0000845g0110	Nitab4.5_0001304g0070		Nitab4.5_0000302g0100			Nitab4.5_0001308g0170			Nitab4.5_0000771g0070	Nitab4.5_0002249g0080		Nitab4.5_0001425g0100	Nitab4.5_0001648g0020		Nitab4.5_0007140g0010	Nitab4.5_0005524g0020					Nitab4.5_0001014g0090	Nitab4.5_0002484g0080		Nitab4.5_0000647g0130	Nitab4.5_0000007g0230					Nitab4.5_0000143g0510			Nitab4.5_0000091g0320	Nitab4.5_0002303g0030
Nitab4.5_0000643g0080	Nitab4.5_0000151g0360		Nitab4.5_0000797g0120	Nitab4.5_0003969g0060		Nitab4.5_0000073g0500	Nitab4.5_0012102g0010		Nitab4.5_0001581g0010			Nitab4.5_0004068g0020	Nitab4.5_0000181g0120		Nitab4.5_0001288g0220	Nitab4.5_0000025g0180		Nitab4.5_0000584g0040			Nitab4.5_0001097g0070			Nitab4.5_0003379g0100	Nitab4.5_0000118g0110		Nitab4.5_0000583g0180	Nitab4.5_0004981g0050		Nitab4.5_0006999g0030	Nitab4.5_0000622g0010					Nitab4.5_0001437g0200	Nitab4.5_0002838g0050		Nitab4.5_0003968g0040	Nitab4.5_0006589g0030					Nitab4.5_0002124g0010			Nitab4.5_0000483g0220	Nitab4.5_0001816g0190
Nitab4.5_0007944g0010	Nitab4.5_0001163g0070		Nitab4.5_0002462g0020	Nitab4.5_0015114g0020		Nitab4.5_0000636g0070	Nitab4.5_0012102g0020		Nitab4.5_0003207g0080			Nitab4.5_0001119g0060	Nitab4.5_0000650g0260		Nitab4.5_0004824g0050	Nitab4.5_0000247g0020		Nitab4.5_0000649g0060			Nitab4.5_0003117g0060			Nitab4.5_0025145g0010	Nitab4.5_0001417g0050		Nitab4.5_0002811g0030	Nitab4.5_0008220g0010		Nitab4.5_0001604g0090	Nitab4.5_0025536g0010					Nitab4.5_0010239g0010	Nitab4.5_0004168g0140		Nitab4.5_0000143g0060	Nitab4.5_0007379g0010					Nitab4.5_0000143g0100			Nitab4.5_0001374g0240	Nitab4.5_0000078g0010
Nitab4.5_0001985g0010	Nitab4.5_0003155g0010		Nitab4.5_0002329g0030	Nitab4.5_0000043g0270		Nitab4.5_0000636g0120	Nitab4.5_0000555g0200		Nitab4.5_0002401g0010			Nitab4.5_0000540g0040	Nitab4.5_0001615g0140		Nitab4.5_0000625g0080	Nitab4.5_0002720g0030		Nitab4.5_0001671g0150			Nitab4.5_0004198g0010			Nitab4.5_0002448g0010	Nitab4.5_0013633g0020		Nitab4.5_0000025g0260	Nitab4.5_0000866g0010		Nitab4.5_0012569g0010	Nitab4.5_0000101g0040					Nitab4.5_0000442g0190	Nitab4.5_0004946g0050		Nitab4.5_0000143g0310	Nitab4.5_0014046g0010					Nitab4.5_0000143g0300			Nitab4.5_0002914g0140	Nitab4.5_0005015g0020
Nitab4.5_0008256g0020	Nitab4.5_0000106g0180		Nitab4.5_0006062g0010	Nitab4.5_0000932g0020		Nitab4.5_0003307g0010	Nitab4.5_0000034g0020		Nitab4.5_0000600g0050			Nitab4.5_0004301g0080	Nitab4.5_0004108g0020		Nitab4.5_0002772g0010	Nitab4.5_0002723g0040		Nitab4.5_0002059g0090			Nitab4.5_0002262g0160			Nitab4.5_0005052g0040	Nitab4.5_0000355g0150		Nitab4.5_0000074g0050	Nitab4.5_0002548g0010		Nitab4.5_0021719g0010	Nitab4.5_0000027g0360					Nitab4.5_0000201g0220	Nitab4.5_0005803g0020		Nitab4.5_0002214g0110	Nitab4.5_0002815g0170					Nitab4.5_0000143g0290			Nitab4.5_0004086g0040	Nitab4.5_0003722g0020
Nitab4.5_0000771g0070	Nitab4.5_0000754g0180		Nitab4.5_0010072g0010	Nitab4.5_0008522g0060		Nitab4.5_0006169g0040	Nitab4.5_0001474g0050		Nitab4.5_0000600g0080			Nitab4.5_0004366g0010	Nitab4.5_0004314g0010		Nitab4.5_0003722g0070	Nitab4.5_0008141g0030		Nitab4.5_0002059g0100			Nitab4.5_0000057g0080			Nitab4.5_0000152g0280	Nitab4.5_0005023g0050		Nitab4.5_0000117g0050	Nitab4.5_0004730g0030		Nitab4.5_0000028g0350	Nitab4.5_0013991g0010					Nitab4.5_0010112g0020	Nitab4.5_0007869g0020		Nitab4.5_0004567g0010	Nitab4.5_0001135g0140					Nitab4.5_0002214g0060			Nitab4.5_0008375g0050	Nitab4.5_0004415g0030
Nitab4.5_0003379g0100	Nitab4.5_0001075g0020		Nitab4.5_0000619g0100	Nitab4.5_0012489g0020		Nitab4.5_0011146g0010	Nitab4.5_0005555g0010		Nitab4.5_0002402g0010			Nitab4.5_0001937g0030	Nitab4.5_0010813g0020		Nitab4.5_0000008g0240	Nitab4.5_0000029g0200		Nitab4.5_0002312g0110			Nitab4.5_0000078g0290			Nitab4.5_0007486g0040	Nitab4.5_0008594g0010		Nitab4.5_0000118g0080	Nitab4.5_0000332g0240		Nitab4.5_0008824g0020	Nitab4.5_0005908g0010					Nitab4.5_0006505g0030	Nitab4.5_0009399g0040		Nitab4.5_0001438g0090	Nitab4.5_0001735g0030					Nitab4.5_0000006g0490			Nitab4.5_0009872g0010	Nitab4.5_0007607g0040
Nitab4.5_0005356g0080	Nitab4.5_0001875g0060		Nitab4.5_0001604g0090	Nitab4.5_0006852g0070		Nitab4.5_0002675g0020	Nitab4.5_0002198g0060		Nitab4.5_0023116g0010			Nitab4.5_0001317g0070	Nitab4.5_0009795g0010		Nitab4.5_0020128g0010	Nitab4.5_0002211g0030		Nitab4.5_0003721g0040			Nitab4.5_0004981g0050			Nitab4.5_0000119g0120	Nitab4.5_0004705g0010		Nitab4.5_0000123g0350	Nitab4.5_0004785g0010		Nitab4.5_0000667g0030	Nitab4.5_0006525g0010					Nitab4.5_0010308g0010	Nitab4.5_0015562g0010		Nitab4.5_0002055g0150	Nitab4.5_0005090g0030					Nitab4.5_0000116g0120			Nitab4.5_0012532g0010	Nitab4.5_0003771g0010
Nitab4.5_0025145g0010	Nitab4.5_0003495g0040		Nitab4.5_0007306g0010	Nitab4.5_0002158g0140		Nitab4.5_0000753g0140	Nitab4.5_0001674g0010		Nitab4.5_0000375g0030			Nitab4.5_0005266g0020	Nitab4.5_0000271g0320		Nitab4.5_0001324g0080	Nitab4.5_0000976g0040		Nitab4.5_0008298g0010			Nitab4.5_0005353g0010			Nitab4.5_0000119g0140	Nitab4.5_0000132g0510		Nitab4.5_0000132g0260	Nitab4.5_0000192g0090		Nitab4.5_0008909g0010	Nitab4.5_0002893g0060					Nitab4.5_0010979g0010	Nitab4.5_0006461g0030		Nitab4.5_0000143g0510	Nitab4.5_0007108g0040					Nitab4.5_0000143g0180			Nitab4.5_0000111g0130	Nitab4.5_0002209g0140
Nitab4.5_0000152g0280	Nitab4.5_0003854g0020		Nitab4.5_0000515g0030	Nitab4.5_0003150g0010		Nitab4.5_0008580g0020	Nitab4.5_0000601g0040		Nitab4.5_0008890g0010			Nitab4.5_0005932g0030	Nitab4.5_0013395g0010		Nitab4.5_0001739g0060	Nitab4.5_0005875g0030		Nitab4.5_0009524g0010			Nitab4.5_0000519g0310			Nitab4.5_0003207g0010	Nitab4.5_0003520g0050		Nitab4.5_0000390g0090	Nitab4.5_0002950g0060		Nitab4.5_0001004g0170	Nitab4.5_0008816g0020					Nitab4.5_0002114g0020	Nitab4.5_0002405g0060		Nitab4.5_0004336g0020	Nitab4.5_0001110g0060					Nitab4.5_0000143g0420			Nitab4.5_0000143g0220	Nitab4.5_0010145g0010
Nitab4.5_0005059g0060	Nitab4.5_0004624g0030		Nitab4.5_0002162g0080	Nitab4.5_0000070g0170		Nitab4.5_0000356g0010	Nitab4.5_0002535g0030		Nitab4.5_0000734g0010			Nitab4.5_0010630g0010	Nitab4.5_0000151g0360		Nitab4.5_0001242g0140	Nitab4.5_0000929g0090		Nitab4.5_0010125g0040			Nitab4.5_0000044g0150			Nitab4.5_0001641g0010	Nitab4.5_0001898g0010		Nitab4.5_0000682g0040	Nitab4.5_0000236g0010		Nitab4.5_0006947g0030	Nitab4.5_0000034g0250					Nitab4.5_0012400g0010	Nitab4.5_0000332g0110		Nitab4.5_0000143g0100	Nitab4.5_0000016g0160					Nitab4.5_0000867g0070			Nitab4.5_0000143g0240	Nitab4.5_0006376g0040
Nitab4.5_0005729g0030	Nitab4.5_0005309g0010		Nitab4.5_0000040g0350	Nitab4.5_0000402g0080		Nitab4.5_0000505g0110	Nitab4.5_0000461g0280		Nitab4.5_0000734g0020			Nitab4.5_0000453g0030	Nitab4.5_0000801g0040		Nitab4.5_0004673g0030	Nitab4.5_0001603g0050		Nitab4.5_0012712g0020			Nitab4.5_0001783g0090			Nitab4.5_0003930g0020	Nitab4.5_0009744g0010		Nitab4.5_0000957g0130	Nitab4.5_0000615g0030		Nitab4.5_0000315g0210	Nitab4.5_0007806g0020					Nitab4.5_0001800g0010	Nitab4.5_0013057g0010		Nitab4.5_0002878g0040	Nitab4.5_0002975g0030					Nitab4.5_0003395g0040			Nitab4.5_0000143g0110	Nitab4.5_0008568g0030
Nitab4.5_0005059g0040	Nitab4.5_0009390g0020		Nitab4.5_0003950g0050	Nitab4.5_0000185g0120		Nitab4.5_0004291g0010	Nitab4.5_0006508g0040		Nitab4.5_0000734g0030			Nitab4.5_0000465g0060	Nitab4.5_0000837g0080		Nitab4.5_0004969g0050	Nitab4.5_0000357g0250		Nitab4.5_0006029g0010			Nitab4.5_0001662g0020			Nitab4.5_0000477g0090	Nitab4.5_0006040g0020		Nitab4.5_0000970g0040	Nitab4.5_0005043g0060		Nitab4.5_0000705g0050	Nitab4.5_0004323g0010					Nitab4.5_0003318g0170	Nitab4.5_0003203g0020		Nitab4.5_0000143g0300	Nitab4.5_0000347g0060					Nitab4.5_0000143g0530			Nitab4.5_0005040g0010	Nitab4.5_0011461g0020
Nitab4.5_0007486g0040	Nitab4.5_0000305g0110		Nitab4.5_0001196g0090	Nitab4.5_0000291g0010		Nitab4.5_0007283g0010	Nitab4.5_0001881g0020		Nitab4.5_0006805g0010			Nitab4.5_0012087g0010	Nitab4.5_0001163g0070		Nitab4.5_0006022g0010	Nitab4.5_0005483g0010		Nitab4.5_0012161g0030			Nitab4.5_0000156g0210			Nitab4.5_0001119g0060	Nitab4.5_0001449g0010		Nitab4.5_0000986g0020	Nitab4.5_0000505g0110		Nitab4.5_0001696g0140	Nitab4.5_0000048g0070					Nitab4.5_0009150g0020	Nitab4.5_0003353g0040		Nitab4.5_0000143g0290	Nitab4.5_0000307g0330					Nitab4.5_0000143g0520			Nitab4.5_0001668g0080	Nitab4.5_0000007g0230
Nitab4.5_0000119g0120	Nitab4.5_0027922g0010		Nitab4.5_0000115g0330	Nitab4.5_0002135g0100		Nitab4.5_0001302g0090	Nitab4.5_0003512g0020		Nitab4.5_0009888g0030			Nitab4.5_0000006g0480	Nitab4.5_0003155g0010		Nitab4.5_0008037g0060	Nitab4.5_0000072g0530		Nitab4.5_0001733g0010			Nitab4.5_0004753g0060			Nitab4.5_0004301g0080	Nitab4.5_0000522g0220		Nitab4.5_0001264g0060	Nitab4.5_0000008g0060		Nitab4.5_0000028g0320	Nitab4.5_0004027g0010					Nitab4.5_0001088g0190	Nitab4.5_0000957g0170		Nitab4.5_0002214g0060	Nitab4.5_0014681g0010					Nitab4.5_0012768g0020			Nitab4.5_0001557g0030	Nitab4.5_0004428g0020
Nitab4.5_0000119g0140	Nitab4.5_0002718g0010		Nitab4.5_0006270g0010	Nitab4.5_0001935g0040		Nitab4.5_0008141g0020	Nitab4.5_0004159g0050		Nitab4.5_0012194g0010			Nitab4.5_0000705g0110	Nitab4.5_0000106g0180		Nitab4.5_0008422g0020	Nitab4.5_0000079g0010		Nitab4.5_0002230g0020			Nitab4.5_0000869g0020			Nitab4.5_0004366g0010	Nitab4.5_0000770g0120		Nitab4.5_0001461g0070	Nitab4.5_0003779g0090		Nitab4.5_0000322g0190	Nitab4.5_0004981g0050					Nitab4.5_0005383g0020	Nitab4.5_0000439g0050		Nitab4.5_0004882g0010	Nitab4.5_0000143g0090					Nitab4.5_0001926g0060			Nitab4.5_0008137g0060	Nitab4.5_0007254g0050
Nitab4.5_0003207g0010	Nitab4.5_0004399g0010		Nitab4.5_0000297g0310	Nitab4.5_0000032g0220		Nitab4.5_0001200g0180	Nitab4.5_0012787g0030		Nitab4.5_0000376g0040			Nitab4.5_0004407g0020	Nitab4.5_0000754g0180		Nitab4.5_0001320g0010	Nitab4.5_0003259g0090		Nitab4.5_0001675g0050			Nitab4.5_0008303g0040			Nitab4.5_0001937g0030	Nitab4.5_0000604g0120		Nitab4.5_0001569g0140	Nitab4.5_0006168g0020		Nitab4.5_0003884g0010	Nitab4.5_0005844g0030					Nitab4.5_0000044g0150	Nitab4.5_0016592g0010		Nitab4.5_0000006g0490	Nitab4.5_0002972g0030					Nitab4.5_0000490g0020			Nitab4.5_0000368g0080	Nitab4.5_0013462g0030
Nitab4.5_0002306g0030	Nitab4.5_0004550g0060		Nitab4.5_0003122g0050	Nitab4.5_0002893g0030		Nitab4.5_0002817g0010	Nitab4.5_0000494g0030		Nitab4.5_0000470g0230			Nitab4.5_0004559g0020	Nitab4.5_0001075g0020		Nitab4.5_0003434g0090	Nitab4.5_0000101g0040		Nitab4.5_0013465g0010			Nitab4.5_0003307g0010			Nitab4.5_0001317g0070	Nitab4.5_0001494g0060		Nitab4.5_0002397g0040	Nitab4.5_0003419g0070		Nitab4.5_0002369g0010	Nitab4.5_0001256g0090					Nitab4.5_0002257g0160	Nitab4.5_0003498g0050		Nitab4.5_0000116g0120	Nitab4.5_0001810g0050					Nitab4.5_0003498g0040			Nitab4.5_0005883g0030	Nitab4.5_0000308g0390
Nitab4.5_0000519g0250	Nitab4.5_0013186g0010		Nitab4.5_0008240g0010	Nitab4.5_0008185g0010		Nitab4.5_0000319g0220	Nitab4.5_0002212g0030		Nitab4.5_0003571g0020			Nitab4.5_0005601g0030	Nitab4.5_0001875g0060		Nitab4.5_0000102g0450	Nitab4.5_0005150g0070		Nitab4.5_0000490g0020			Nitab4.5_0000753g0140			Nitab4.5_0005266g0020	Nitab4.5_0001385g0040		Nitab4.5_0002725g0010	Nitab4.5_0004422g0030		Nitab4.5_0008677g0030	Nitab4.5_0007834g0030					Nitab4.5_0000192g0090	Nitab4.5_0000462g0050		Nitab4.5_0000143g0180	Nitab4.5_0000208g0410					Nitab4.5_0002214g0080			Nitab4.5_0005886g0020	Nitab4.5_0000426g0080
Nitab4.5_0001641g0010	Nitab4.5_0000139g0010		Nitab4.5_0001145g0020	Nitab4.5_0008185g0020		Nitab4.5_0001318g0050	Nitab4.5_0013024g0010		Nitab4.5_0001083g0010			Nitab4.5_0011515g0010	Nitab4.5_0003495g0040		Nitab4.5_0000880g0110	Nitab4.5_0000451g0150		Nitab4.5_0007276g0010			Nitab4.5_0002112g0040			Nitab4.5_0005932g0030	Nitab4.5_0007293g0010		Nitab4.5_0003746g0010	Nitab4.5_0001235g0030		Nitab4.5_0003715g0060	Nitab4.5_0010239g0010					Nitab4.5_0003382g0030	Nitab4.5_0005766g0040		Nitab4.5_0000143g0280	Nitab4.5_0004981g0060					Nitab4.5_0000143g0170			Nitab4.5_0000567g0010	Nitab4.5_0002345g0080
Nitab4.5_0005002g0010	Nitab4.5_0006537g0020		Nitab4.5_0000185g0300	Nitab4.5_0005296g0050		Nitab4.5_0006389g0020	Nitab4.5_0012462g0010		Nitab4.5_0001375g0160			Nitab4.5_0001789g0040	Nitab4.5_0003854g0020		Nitab4.5_0000994g0050	Nitab4.5_0013991g0010		Nitab4.5_0003498g0040			Nitab4.5_0003652g0010			Nitab4.5_0010630g0010	Nitab4.5_0011271g0080		Nitab4.5_0003887g0030	Nitab4.5_0000319g0220		Nitab4.5_0000040g0410	Nitab4.5_0003603g0100					Nitab4.5_0002499g0070	Nitab4.5_0009514g0070		Nitab4.5_0000143g0370	Nitab4.5_0000357g0200					Nitab4.5_0000143g0270			Nitab4.5_0000567g0030	Nitab4.5_0006475g0040
Nitab4.5_0000956g0150	Nitab4.5_0003300g0080		Nitab4.5_0006117g0040	Nitab4.5_0012105g0010		Nitab4.5_0000463g0020	Nitab4.5_0001657g0010		Nitab4.5_0000333g0020			Nitab4.5_0004281g0050	Nitab4.5_0004624g0030		Nitab4.5_0009383g0010	Nitab4.5_0001390g0020		Nitab4.5_0012806g0010			Nitab4.5_0000202g0470			Nitab4.5_0000668g0090	Nitab4.5_0000766g0050		Nitab4.5_0004799g0010	Nitab4.5_0006389g0020		Nitab4.5_0000116g0120	Nitab4.5_0001823g0050					Nitab4.5_0000082g0210	Nitab4.5_0000074g0190		Nitab4.5_0000143g0420	Nitab4.5_0010106g0010					Nitab4.5_0000425g0230			Nitab4.5_0009500g0010	Nitab4.5_0000134g0030
Nitab4.5_0001119g0060	Nitab4.5_0003481g0010		Nitab4.5_0012494g0040	Nitab4.5_0000130g0050		Nitab4.5_0002700g0150	Nitab4.5_0001278g0050		Nitab4.5_0001035g0010			Nitab4.5_0006899g0030	Nitab4.5_0005309g0010		Nitab4.5_0007459g0030	Nitab4.5_0009001g0010		Nitab4.5_0000040g0600			Nitab4.5_0009332g0030			Nitab4.5_0001110g0030	Nitab4.5_0001076g0030		Nitab4.5_0008073g0010	Nitab4.5_0000463g0020		Nitab4.5_0000784g0040	Nitab4.5_0001783g0030					Nitab4.5_0002214g0100	Nitab4.5_0000109g0570		Nitab4.5_0000305g0100	Nitab4.5_0002465g0090					Nitab4.5_0001296g0120			Nitab4.5_0002140g0020	Nitab4.5_0001483g0030
Nitab4.5_0000540g0040	Nitab4.5_0006739g0020		Nitab4.5_0001489g0020	Nitab4.5_0002338g0020		Nitab4.5_0003969g0060	Nitab4.5_0000795g0010		Nitab4.5_0002377g0030			Nitab4.5_0008294g0030	Nitab4.5_0011951g0010		Nitab4.5_0003465g0080	Nitab4.5_0017990g0020		Nitab4.5_0000062g0550			Nitab4.5_0002238g0090			Nitab4.5_0002881g0090	Nitab4.5_0001297g0050		Nitab4.5_0008189g0010	Nitab4.5_0001190g0040		Nitab4.5_0000976g0150	Nitab4.5_0000314g0050					Nitab4.5_0001277g0070	Nitab4.5_0002427g0060		Nitab4.5_0001338g0030	Nitab4.5_0003337g0030					Nitab4.5_0001296g0170			Nitab4.5_0007895g0010	Nitab4.5_0006073g0030
Nitab4.5_0004301g0080	Nitab4.5_0000312g0090		Nitab4.5_0000252g0160	Nitab4.5_0005830g0010		Nitab4.5_0005256g0020	Nitab4.5_0006546g0010		Nitab4.5_0004492g0010			Nitab4.5_0008726g0010	Nitab4.5_0000305g0110		Nitab4.5_0007109g0010	Nitab4.5_0000222g0170		Nitab4.5_0000109g0570			Nitab4.5_0004905g0070			Nitab4.5_0004511g0010	Nitab4.5_0001381g0190		Nitab4.5_0010215g0010	Nitab4.5_0003969g0060		Nitab4.5_0001186g0030	Nitab4.5_0000314g0090					Nitab4.5_0003779g0090	Nitab4.5_0004334g0050		Nitab4.5_0001397g0010	Nitab4.5_0000113g0260					Nitab4.5_0001438g0010			Nitab4.5_0011042g0010	Nitab4.5_0002382g0030
Nitab4.5_0004366g0010	Nitab4.5_0000202g0370		Nitab4.5_0000678g0050	Nitab4.5_0001739g0010		Nitab4.5_0002782g0100	Nitab4.5_0000170g0380		Nitab4.5_0005487g0010			Nitab4.5_0002764g0060	Nitab4.5_0027922g0010		Nitab4.5_0003378g0080	Nitab4.5_0001013g0090		Nitab4.5_0000705g0140			Nitab4.5_0009567g0030			Nitab4.5_0001961g0020	Nitab4.5_0001454g0120		Nitab4.5_0012256g0020	Nitab4.5_0005133g0020		Nitab4.5_0001192g0020	Nitab4.5_0000314g0100					Nitab4.5_0000143g0040	Nitab4.5_0004465g0100		Nitab4.5_0002530g0020	Nitab4.5_0003841g0020					Nitab4.5_0001668g0150			Nitab4.5_0000295g0010	Nitab4.5_0007254g0040
Nitab4.5_0001937g0030	Nitab4.5_0006110g0040		Nitab4.5_0001600g0060	Nitab4.5_0000525g0130		Nitab4.5_0002158g0140	Nitab4.5_0001383g0180		Nitab4.5_0009567g0010			Nitab4.5_0010535g0010	Nitab4.5_0002718g0010		Nitab4.5_0000075g0010	Nitab4.5_0000669g0220		Nitab4.5_0000718g0110			Nitab4.5_0005256g0020			Nitab4.5_0001789g0010	Nitab4.5_0002289g0050		Nitab4.5_0012894g0010	Nitab4.5_0015114g0020		Nitab4.5_0001922g0090	Nitab4.5_0004716g0010					Nitab4.5_0011724g0010	Nitab4.5_0006220g0060		Nitab4.5_0002863g0030	Nitab4.5_0000302g0090					Nitab4.5_0002621g0120			Nitab4.5_0001905g0040	Nitab4.5_0000797g0120
Nitab4.5_0001317g0070	Nitab4.5_0000208g0320		Nitab4.5_0004480g0050	Nitab4.5_0003494g0020		Nitab4.5_0004564g0010	Nitab4.5_0000072g0620		Nitab4.5_0010461g0020			Nitab4.5_0007718g0030	Nitab4.5_0004399g0010		Nitab4.5_0012494g0030	Nitab4.5_0001648g0020		Nitab4.5_0000944g0100			Nitab4.5_0002839g0010			Nitab4.5_0000465g0060	Nitab4.5_0003043g0010		Nitab4.5_0000316g0350	Nitab4.5_0000043g0270		Nitab4.5_0002171g0020	Nitab4.5_0004716g0020					Nitab4.5_0000143g0050	Nitab4.5_0006358g0080		Nitab4.5_0003229g0110	Nitab4.5_0001822g0090								Nitab4.5_0007488g0040	Nitab4.5_0000349g0280
Nitab4.5_0005266g0020	Nitab4.5_0006154g0010		Nitab4.5_0000408g0160	Nitab4.5_0000617g0250		Nitab4.5_0003407g0030	Nitab4.5_0000794g0030		Nitab4.5_0000032g0090			Nitab4.5_0012888g0010	Nitab4.5_0008791g0010		Nitab4.5_0001026g0010	Nitab4.5_0001128g0120		Nitab4.5_0001259g0020			Nitab4.5_0000588g0260			Nitab4.5_0000864g0090	Nitab4.5_0006203g0020		Nitab4.5_0000446g0210	Nitab4.5_0000932g0020		Nitab4.5_0002575g0070	Nitab4.5_0004707g0070					Nitab4.5_0000214g0050	Nitab4.5_0008368g0010		Nitab4.5_0003395g0040	Nitab4.5_0005808g0010								Nitab4.5_0012245g0040	Nitab4.5_0000428g0090
Nitab4.5_0005932g0030	Nitab4.5_0008304g0010		Nitab4.5_0003310g0010	Nitab4.5_0002569g0050		Nitab4.5_0003397g0020	Nitab4.5_0004897g0020		Nitab4.5_0002398g0060			Nitab4.5_0015929g0010	Nitab4.5_0008490g0020		Nitab4.5_0008353g0040	Nitab4.5_0010239g0010		Nitab4.5_0002427g0060			Nitab4.5_0006213g0010			Nitab4.5_0012087g0010	Nitab4.5_0006985g0020		Nitab4.5_0000540g0320	Nitab4.5_0000312g0130		Nitab4.5_0002822g0010	Nitab4.5_0002052g0100					Nitab4.5_0004355g0040	Nitab4.5_0009791g0020		Nitab4.5_0006375g0010	Nitab4.5_0003854g0030								Nitab4.5_0001143g0060	Nitab4.5_0000722g0020
Nitab4.5_0010630g0010	Nitab4.5_0009137g0010		Nitab4.5_0001778g0110	Nitab4.5_0006549g0030		Nitab4.5_0000308g0230	Nitab4.5_0000482g0170		Nitab4.5_0000814g0020			Nitab4.5_0002286g0030	Nitab4.5_0002257g0010		Nitab4.5_0001051g0160	Nitab4.5_0012400g0010					Nitab4.5_0005326g0040			Nitab4.5_0006152g0030	Nitab4.5_0007573g0030		Nitab4.5_0000496g0030	Nitab4.5_0008522g0060		Nitab4.5_0003719g0010	Nitab4.5_0003345g0010					Nitab4.5_0008329g0050			Nitab4.5_0010125g0040	Nitab4.5_0000246g0260								Nitab4.5_0001383g0100	Nitab4.5_0006561g0040
Nitab4.5_0000307g0090	Nitab4.5_0000732g0140		Nitab4.5_0002458g0030	Nitab4.5_0001128g0050		Nitab4.5_0000218g0070	Nitab4.5_0000631g0110		Nitab4.5_0006525g0010			Nitab4.5_0002845g0040	Nitab4.5_0000139g0010		Nitab4.5_0001425g0020	Nitab4.5_0004730g0030					Nitab4.5_0003018g0020			Nitab4.5_0000839g0060	Nitab4.5_0011459g0010		Nitab4.5_0000406g0050	Nitab4.5_0012489g0020		Nitab4.5_0004063g0040	Nitab4.5_0007842g0020					Nitab4.5_0000274g0090			Nitab4.5_0007975g0010	Nitab4.5_0001145g0020								Nitab4.5_0003902g0060	Nitab4.5_0000350g0030
Nitab4.5_0000668g0090	Nitab4.5_0000241g0120		Nitab4.5_0000026g0340	Nitab4.5_0006014g0060		Nitab4.5_0000442g0110	Nitab4.5_0003449g0080		Nitab4.5_0001950g0060			Nitab4.5_0000912g0150	Nitab4.5_0000496g0150		Nitab4.5_0008205g0010	Nitab4.5_0017998g0020					Nitab4.5_0000145g0180			Nitab4.5_0000231g0020	Nitab4.5_0011578g0040		Nitab4.5_0009181g0010	Nitab4.5_0006852g0070		Nitab4.5_0005251g0010	Nitab4.5_0009310g0010					Nitab4.5_0000564g0190			Nitab4.5_0000143g0530	Nitab4.5_0000736g0080								Nitab4.5_0004082g0010	Nitab4.5_0003995g0030
Nitab4.5_0001110g0030	Nitab4.5_0022569g0020		Nitab4.5_0003694g0060	Nitab4.5_0000194g0160		Nitab4.5_0000284g0040	Nitab4.5_0010308g0030		Nitab4.5_0004979g0130			Nitab4.5_0000699g0100	Nitab4.5_0006537g0020		Nitab4.5_0002811g0030	Nitab4.5_0000912g0060					Nitab4.5_0010125g0010			Nitab4.5_0000006g0480	Nitab4.5_0022765g0010		Nitab4.5_0000723g0150	Nitab4.5_0003150g0010		Nitab4.5_0006340g0010	Nitab4.5_0005008g0010					Nitab4.5_0003062g0050			Nitab4.5_0000143g0520	Nitab4.5_0004177g0020								Nitab4.5_0001088g0020	Nitab4.5_0004334g0060
Nitab4.5_0001789g0010	Nitab4.5_0007763g0010		Nitab4.5_0003786g0010	Nitab4.5_0000170g0270		Nitab4.5_0001439g0060	Nitab4.5_0012069g0010		Nitab4.5_0009598g0010			Nitab4.5_0005796g0040	Nitab4.5_0013117g0010		Nitab4.5_0000161g0280	Nitab4.5_0000314g0100					Nitab4.5_0000308g0230			Nitab4.5_0000120g0010	Nitab4.5_0000181g0120		Nitab4.5_0003883g0030	Nitab4.5_0010469g0010		Nitab4.5_0006574g0030	Nitab4.5_0000017g0230					Nitab4.5_0000154g0280			Nitab4.5_0001926g0060	Nitab4.5_0004743g0100								Nitab4.5_0002214g0030	Nitab4.5_0009237g0010
Nitab4.5_0000465g0060	Nitab4.5_0004387g0030		Nitab4.5_0003062g0080	Nitab4.5_0000634g0220		Nitab4.5_0000110g0080	Nitab4.5_0012091g0020		Nitab4.5_0010037g0020			Nitab4.5_0001063g0080	Nitab4.5_0003300g0080		Nitab4.5_0009461g0010	Nitab4.5_0001783g0090					Nitab4.5_0000218g0070			Nitab4.5_0000705g0110	Nitab4.5_0000650g0260		Nitab4.5_0000092g0310	Nitab4.5_0011597g0010		Nitab4.5_0007028g0010	Nitab4.5_0002039g0060					Nitab4.5_0000978g0180			Nitab4.5_0004554g0010	Nitab4.5_0000639g0190								Nitab4.5_0009733g0010	Nitab4.5_0003308g0070
Nitab4.5_0012087g0010	Nitab4.5_0000525g0110		Nitab4.5_0002369g0010	Nitab4.5_0001186g0050		Nitab4.5_0000153g0190	Nitab4.5_0002604g0030		Nitab4.5_0010037g0030			Nitab4.5_0002042g0070	Nitab4.5_0003481g0010		Nitab4.5_0000845g0120	Nitab4.5_0002370g0050					Nitab4.5_0001183g0090			Nitab4.5_0004407g0020	Nitab4.5_0001615g0140		Nitab4.5_0000838g0160	Nitab4.5_0020716g0010		Nitab4.5_0009995g0020	Nitab4.5_0000003g0420					Nitab4.5_0010348g0010			Nitab4.5_0000091g0510	Nitab4.5_0001897g0030								Nitab4.5_0007185g0070	Nitab4.5_0001004g0170
Nitab4.5_0002541g0050	Nitab4.5_0001606g0030		Nitab4.5_0000826g0260	Nitab4.5_0000143g0110		Nitab4.5_0000967g0110	Nitab4.5_0000631g0090		Nitab4.5_0000032g0010			Nitab4.5_0002408g0020	Nitab4.5_0007797g0020		Nitab4.5_0000025g0260	Nitab4.5_0002950g0060					Nitab4.5_0001200g0090			Nitab4.5_0004559g0020	Nitab4.5_0004108g0020		Nitab4.5_0000906g0010	Nitab4.5_0004721g0030		Nitab4.5_0010036g0010	Nitab4.5_0000615g0030					Nitab4.5_0003152g0170			Nitab4.5_0001134g0070	Nitab4.5_0000113g0160								Nitab4.5_0000029g0110	Nitab4.5_0004177g0020
Nitab4.5_0000006g0480	Nitab4.5_0001781g0120		Nitab4.5_0002250g0010	Nitab4.5_0003626g0120		Nitab4.5_0000202g0020	Nitab4.5_0001889g0160		Nitab4.5_0005382g0020			Nitab4.5_0001078g0140	Nitab4.5_0000380g0230		Nitab4.5_0000074g0050	Nitab4.5_0001097g0020					Nitab4.5_0000284g0040			Nitab4.5_0005601g0030	Nitab4.5_0004314g0010		Nitab4.5_0003418g0050	Nitab4.5_0003152g0170		Nitab4.5_0010125g0040	Nitab4.5_0000692g0030					Nitab4.5_0000562g0110			Nitab4.5_0000446g0040	Nitab4.5_0001575g0050								Nitab4.5_0000614g0070	Nitab4.5_0004059g0030
Nitab4.5_0000120g0010	Nitab4.5_0011157g0010		Nitab4.5_0000125g0360	Nitab4.5_0007327g0030		Nitab4.5_0004234g0080	Nitab4.5_0001145g0030		Nitab4.5_0000222g0170			Nitab4.5_0007011g0010	Nitab4.5_0002706g0030		Nitab4.5_0000117g0050	Nitab4.5_0000236g0010					Nitab4.5_0000604g0030			Nitab4.5_0011515g0010	Nitab4.5_0010813g0020		Nitab4.5_0000315g0120	Nitab4.5_0000032g0220		Nitab4.5_0011079g0020	Nitab4.5_0013405g0010					Nitab4.5_0000143g0120			Nitab4.5_0002214g0080	Nitab4.5_0011802g0020								Nitab4.5_0000832g0040	Nitab4.5_0000322g0190
Nitab4.5_0000705g0110	Nitab4.5_0000932g0030		Nitab4.5_0000190g0010	Nitab4.5_0006691g0030		Nitab4.5_0001471g0010	Nitab4.5_0006090g0010		Nitab4.5_0001013g0090			Nitab4.5_0000486g0050	Nitab4.5_0000208g0320		Nitab4.5_0000118g0080	Nitab4.5_0000646g0350					Nitab4.5_0001119g0070			Nitab4.5_0001432g0040	Nitab4.5_0000151g0360		Nitab4.5_0012857g0010	Nitab4.5_0002893g0030		Nitab4.5_0003313g0050	Nitab4.5_0001134g0090					Nitab4.5_0000252g0100			Nitab4.5_0000021g0420	Nitab4.5_0000555g0150								Nitab4.5_0001289g0020	Nitab4.5_0000871g0060
Nitab4.5_0004407g0020	Nitab4.5_0002522g0040		Nitab4.5_0000257g0220	Nitab4.5_0009242g0010		Nitab4.5_0005913g0010	Nitab4.5_0005699g0020		Nitab4.5_0000057g0080			Nitab4.5_0011256g0010	Nitab4.5_0000732g0140		Nitab4.5_0000184g0270	Nitab4.5_0002162g0130					Nitab4.5_0000059g0310			Nitab4.5_0001789g0040	Nitab4.5_0001163g0070		Nitab4.5_0005116g0010	Nitab4.5_0008185g0010		Nitab4.5_0003871g0010	Nitab4.5_0001426g0010					Nitab4.5_0004234g0010			Nitab4.5_0000033g0310	Nitab4.5_0008193g0010								Nitab4.5_0001815g0020	Nitab4.5_0002458g0030
Nitab4.5_0004559g0020	Nitab4.5_0009196g0020		Nitab4.5_0000452g0070	Nitab4.5_0014511g0010		Nitab4.5_0000782g0030	Nitab4.5_0000483g0270		Nitab4.5_0004981g0050			Nitab4.5_0000312g0150	Nitab4.5_0005702g0040		Nitab4.5_0000234g0280	Nitab4.5_0000505g0110					Nitab4.5_0000073g0270			Nitab4.5_0002534g0050	Nitab4.5_0003914g0040		Nitab4.5_0003207g0080	Nitab4.5_0002050g0170		Nitab4.5_0005046g0010	Nitab4.5_0001356g0110					Nitab4.5_0000958g0070			Nitab4.5_0000062g0190	Nitab4.5_0000962g0020								Nitab4.5_0002462g0090	Nitab4.5_0000170g0370
Nitab4.5_0005601g0030	Nitab4.5_0000592g0020		Nitab4.5_0000534g0090	Nitab4.5_0001301g0080		Nitab4.5_0003040g0010	Nitab4.5_0020026g0010		Nitab4.5_0006638g0030			Nitab4.5_0005421g0010	Nitab4.5_0000241g0120		Nitab4.5_0000806g0160	Nitab4.5_0013405g0010					Nitab4.5_0004234g0080			Nitab4.5_0004281g0050	Nitab4.5_0000005g0470		Nitab4.5_0000291g0060	Nitab4.5_0011569g0020		Nitab4.5_0005400g0010	Nitab4.5_0011908g0010					Nitab4.5_0002214g0120			Nitab4.5_0000105g0350	Nitab4.5_0006411g0010								Nitab4.5_0003436g0020	Nitab4.5_0000601g0080
Nitab4.5_0011515g0010	Nitab4.5_0001209g0010		Nitab4.5_0001151g0010	Nitab4.5_0000412g0020		Nitab4.5_0001495g0130	Nitab4.5_0004438g0020		Nitab4.5_0007383g0010			Nitab4.5_0000062g0280	Nitab4.5_0022569g0020		Nitab4.5_0000946g0010	Nitab4.5_0000506g0120					Nitab4.5_0002430g0020			Nitab4.5_0006899g0030	Nitab4.5_0000106g0180		Nitab4.5_0002066g0100	Nitab4.5_0001263g0040		Nitab4.5_0018164g0010	Nitab4.5_0009912g0030					Nitab4.5_0000143g0350			Nitab4.5_0000143g0170	Nitab4.5_0000562g0080								Nitab4.5_0004361g0030	Nitab4.5_0000574g0200
Nitab4.5_0001789g0040	Nitab4.5_0002651g0010		Nitab4.5_0001151g0020	Nitab4.5_0000953g0030		Nitab4.5_0004423g0010	Nitab4.5_0000013g0090		Nitab4.5_0011475g0010			Nitab4.5_0000123g0220	Nitab4.5_0000525g0110		Nitab4.5_0000957g0130	Nitab4.5_0003779g0090					Nitab4.5_0003040g0040			Nitab4.5_0008726g0010	Nitab4.5_0000389g0020		Nitab4.5_0010022g0010	Nitab4.5_0001495g0130		Nitab4.5_0004787g0010	Nitab4.5_0006291g0060					Nitab4.5_0011429g0030			Nitab4.5_0000143g0270	Nitab4.5_0002675g0030								Nitab4.5_0006269g0030	Nitab4.5_0021859g0010
Nitab4.5_0004281g0050	Nitab4.5_0006474g0020		Nitab4.5_0003201g0010	Nitab4.5_0004332g0070		Nitab4.5_0000023g0480	Nitab4.5_0000064g0040		Nitab4.5_0001662g0020			Nitab4.5_0002759g0020	Nitab4.5_0004203g0030		Nitab4.5_0000986g0020	Nitab4.5_0003419g0070					Nitab4.5_0001495g0130			Nitab4.5_0002764g0060	Nitab4.5_0000754g0180		Nitab4.5_0007739g0010	Nitab4.5_0004423g0010		Nitab4.5_0009050g0050	Nitab4.5_0000059g0450					Nitab4.5_0000461g0040			Nitab4.5_0001296g0120	Nitab4.5_0005390g0060								Nitab4.5_0012069g0010	Nitab4.5_0000116g0120
Nitab4.5_0006899g0030	Nitab4.5_0000131g0370		Nitab4.5_0005172g0010	Nitab4.5_0011667g0010		Nitab4.5_0000075g0040	Nitab4.5_0000285g0020		Nitab4.5_0001662g0030			Nitab4.5_0002978g0120	Nitab4.5_0001606g0030		Nitab4.5_0001264g0060	Nitab4.5_0000193g0120					Nitab4.5_0004423g0010			Nitab4.5_0001315g0220	Nitab4.5_0001075g0020		Nitab4.5_0002584g0030	Nitab4.5_0011027g0010		Nitab4.5_0002568g0030	Nitab4.5_0000063g0110					Nitab4.5_0001986g0020			Nitab4.5_0001296g0170	Nitab4.5_0006960g0030								Nitab4.5_0011231g0010	Nitab4.5_0001922g0090
Nitab4.5_0008726g0010	Nitab4.5_0008771g0010		Nitab4.5_0005851g0010	Nitab4.5_0000121g0260		Nitab4.5_0002257g0090	Nitab4.5_0004218g0040		Nitab4.5_0002495g0050			Nitab4.5_0000255g0340	Nitab4.5_0001781g0120		Nitab4.5_0001377g0040	Nitab4.5_0002232g0010					Nitab4.5_0007090g0020			Nitab4.5_0007758g0020	Nitab4.5_0001875g0060		Nitab4.5_0007495g0030	Nitab4.5_0000525g0130		Nitab4.5_0000035g0300	Nitab4.5_0000502g0160					Nitab4.5_0000339g0150			Nitab4.5_0001361g0080	Nitab4.5_0000008g0010								Nitab4.5_0015205g0010	Nitab4.5_0002484g0080
Nitab4.5_0001187g0080	Nitab4.5_0000183g0030		Nitab4.5_0006137g0040	Nitab4.5_0001050g0010		Nitab4.5_0006574g0010	Nitab4.5_0009800g0010		Nitab4.5_0000156g0210			Nitab4.5_0010678g0010	Nitab4.5_0001957g0010		Nitab4.5_0001439g0050	Nitab4.5_0008425g0010					Nitab4.5_0000023g0480			Nitab4.5_0002286g0030	Nitab4.5_0003495g0040		Nitab4.5_0023116g0010	Nitab4.5_0001556g0040		Nitab4.5_0002230g0020	Nitab4.5_0000070g0160					Nitab4.5_0000202g0040			Nitab4.5_0001438g0010	Nitab4.5_0000242g0110								Nitab4.5_0000031g0370	Nitab4.5_0002838g0050
Nitab4.5_0002764g0060	Nitab4.5_0004146g0020		Nitab4.5_0007045g0010	Nitab4.5_0003212g0030		Nitab4.5_0003738g0070	Nitab4.5_0000614g0100		Nitab4.5_0009324g0030			Nitab4.5_0000718g0200	Nitab4.5_0011157g0010		Nitab4.5_0001461g0070	Nitab4.5_0000319g0220					Nitab4.5_0000463g0010			Nitab4.5_0002845g0040	Nitab4.5_0003854g0020		Nitab4.5_0002577g0030	Nitab4.5_0000681g0160		Nitab4.5_0004554g0010	Nitab4.5_0003831g0050					Nitab4.5_0000375g0050			Nitab4.5_0001668g0150	Nitab4.5_0000375g0230								Nitab4.5_0000884g0010	Nitab4.5_0004168g0140
Nitab4.5_0004857g0020	Nitab4.5_0005180g0050		Nitab4.5_0011784g0010	Nitab4.5_0008488g0010		Nitab4.5_0002227g0020	Nitab4.5_0000307g0330		Nitab4.5_0008303g0040			Nitab4.5_0017683g0010	Nitab4.5_0012044g0010		Nitab4.5_0001569g0140	Nitab4.5_0006389g0020					Nitab4.5_0001601g0030			Nitab4.5_0007718g0030	Nitab4.5_0005309g0010		Nitab4.5_0000058g0020	Nitab4.5_0001239g0050		Nitab4.5_0000446g0010	Nitab4.5_0001523g0030					Nitab4.5_0000705g0120			Nitab4.5_0002526g0060	Nitab4.5_0000437g0160								Nitab4.5_0001691g0050	Nitab4.5_0009461g0020
Nitab4.5_0007758g0020	Nitab4.5_0002334g0050		Nitab4.5_0001815g0050	Nitab4.5_0012878g0020		Nitab4.5_0009454g0010	Nitab4.5_0004396g0020		Nitab4.5_0000364g0030			Nitab4.5_0001981g0040	Nitab4.5_0001969g0090		Nitab4.5_0001842g0110	Nitab4.5_0000463g0020					Nitab4.5_0003768g0030			Nitab4.5_0012888g0010	Nitab4.5_0011951g0010		Nitab4.5_0000375g0030	Nitab4.5_0001924g0080		Nitab4.5_0003934g0070	Nitab4.5_0000140g0010					Nitab4.5_0001817g0010			Nitab4.5_0005155g0030	Nitab4.5_0000468g0090								Nitab4.5_0000143g0400	Nitab4.5_0010125g0040
Nitab4.5_0002824g0070	Nitab4.5_0005820g0060		Nitab4.5_0000037g0350	Nitab4.5_0001777g0040		Nitab4.5_0004449g0050	Nitab4.5_0006224g0010		Nitab4.5_0000636g0070			Nitab4.5_0002139g0060	Nitab4.5_0002522g0040		Nitab4.5_0001857g0030	Nitab4.5_0000637g0030					Nitab4.5_0006574g0010			Nitab4.5_0015929g0010	Nitab4.5_0000305g0110		Nitab4.5_0001817g0020	Nitab4.5_0010758g0040		Nitab4.5_0013465g0010	Nitab4.5_0002707g0040					Nitab4.5_0004718g0010			Nitab4.5_0006170g0010	Nitab4.5_0000716g0240								Nitab4.5_0001283g0040	Nitab4.5_0000332g0110
Nitab4.5_0005910g0010	Nitab4.5_0000269g0090		Nitab4.5_0002285g0030	Nitab4.5_0000540g0020		Nitab4.5_0001194g0100	Nitab4.5_0006645g0060		Nitab4.5_0002570g0020			Nitab4.5_0003139g0050	Nitab4.5_0004567g0080		Nitab4.5_0002027g0030	Nitab4.5_0002700g0150					Nitab4.5_0010695g0040			Nitab4.5_0000699g0100	Nitab4.5_0027922g0010		Nitab4.5_0005295g0010	Nitab4.5_0000181g0170		Nitab4.5_0000244g0350	Nitab4.5_0000185g0120					Nitab4.5_0006148g0040			Nitab4.5_0008143g0010	Nitab4.5_0000782g0220								Nitab4.5_0000143g0540	Nitab4.5_0000957g0170
Nitab4.5_0007718g0030	Nitab4.5_0000316g0050		Nitab4.5_0002230g0020	Nitab4.5_0003642g0060		Nitab4.5_0003908g0010	Nitab4.5_0000533g0080		Nitab4.5_0003307g0010			Nitab4.5_0006635g0050	Nitab4.5_0009196g0020		Nitab4.5_0002188g0020	Nitab4.5_0003969g0060					Nitab4.5_0003738g0070			Nitab4.5_0004576g0030	Nitab4.5_0002954g0070		Nitab4.5_0008890g0010	Nitab4.5_0000170g0270		Nitab4.5_0009499g0020	Nitab4.5_0012702g0010					Nitab4.5_0001601g0030				Nitab4.5_0000902g0020								Nitab4.5_0000016g0070	Nitab4.5_0007650g0040
Nitab4.5_0012888g0010	Nitab4.5_0002801g0020		Nitab4.5_0004476g0050	Nitab4.5_0002914g0120		Nitab4.5_0001044g0210	Nitab4.5_0001144g0030		Nitab4.5_0011146g0010			Nitab4.5_0009821g0020	Nitab4.5_0000930g0030		Nitab4.5_0002278g0080	Nitab4.5_0015114g0020					Nitab4.5_0002227g0020			Nitab4.5_0007120g0010	Nitab4.5_0000438g0090		Nitab4.5_0000600g0060	Nitab4.5_0002687g0020		Nitab4.5_0000874g0020	Nitab4.5_0001654g0020					Nitab4.5_0002695g0070				Nitab4.5_0000964g0030								Nitab4.5_0000285g0020	Nitab4.5_0007185g0030
Nitab4.5_0000699g0100	Nitab4.5_0000195g0010		Nitab4.5_0000329g0220	Nitab4.5_0005958g0020		Nitab4.5_0014584g0010	Nitab4.5_0001623g0040		Nitab4.5_0003241g0010			Nitab4.5_0011581g0010	Nitab4.5_0001209g0010		Nitab4.5_0002547g0010	Nitab4.5_0000043g0270					Nitab4.5_0009454g0010			Nitab4.5_0007860g0010	Nitab4.5_0002718g0010		Nitab4.5_0007739g0040	Nitab4.5_0009910g0010		Nitab4.5_0004275g0010	Nitab4.5_0000273g0090					Nitab4.5_0007963g0040				Nitab4.5_0001164g0080								Nitab4.5_0000614g0100	Nitab4.5_0000555g0240
Nitab4.5_0005796g0040	Nitab4.5_0000304g0030		Nitab4.5_0001819g0100	Nitab4.5_0022042g0010		Nitab4.5_0007351g0020	Nitab4.5_0001657g0030		Nitab4.5_0009048g0020			Nitab4.5_0002150g0140	Nitab4.5_0006474g0020		Nitab4.5_0002725g0010	Nitab4.5_0000932g0020					Nitab4.5_0000115g0270			Nitab4.5_0010237g0030	Nitab4.5_0004399g0010		Nitab4.5_0000280g0010	Nitab4.5_0000634g0220		Nitab4.5_0000169g0040	Nitab4.5_0009553g0010					Nitab4.5_0008279g0060				Nitab4.5_0001515g0070								Nitab4.5_0000116g0320	Nitab4.5_0002553g0030
Nitab4.5_0002042g0070	Nitab4.5_0002860g0010		Nitab4.5_0010254g0040	Nitab4.5_0006367g0020		Nitab4.5_0009910g0010	Nitab4.5_0005800g0010		Nitab4.5_0000753g0140			Nitab4.5_0002294g0040	Nitab4.5_0003111g0050		Nitab4.5_0003139g0010	Nitab4.5_0008522g0060					Nitab4.5_0000137g0100			Nitab4.5_0002042g0070	Nitab4.5_0000139g0010		Nitab4.5_0000486g0010	Nitab4.5_0001186g0050		Nitab4.5_0000944g0100	Nitab4.5_0000562g0110					Nitab4.5_0002227g0020				Nitab4.5_0002405g0050								Nitab4.5_0001859g0060	Nitab4.5_0004983g0040
Nitab4.5_0002408g0020	Nitab4.5_0004009g0040		Nitab4.5_0000151g0010	Nitab4.5_0008372g0010		Nitab4.5_0008553g0010	Nitab4.5_0005975g0010		Nitab4.5_0003652g0010			Nitab4.5_0002306g0020	Nitab4.5_0000131g0370		Nitab4.5_0003746g0010	Nitab4.5_0012489g0020					Nitab4.5_0002898g0030			Nitab4.5_0002408g0020	Nitab4.5_0000496g0150		Nitab4.5_0005506g0020	Nitab4.5_0000044g0490		Nitab4.5_0001378g0080	Nitab4.5_0000059g0320					Nitab4.5_0013202g0010				Nitab4.5_0002484g0080								Nitab4.5_0001668g0090	Nitab4.5_0000587g0070
Nitab4.5_0001078g0140	Nitab4.5_0012411g0010		Nitab4.5_0008134g0010	Nitab4.5_0012102g0010		Nitab4.5_0005120g0090	Nitab4.5_0007760g0010		Nitab4.5_0010352g0010			Nitab4.5_0000765g0020	Nitab4.5_0008771g0010		Nitab4.5_0003887g0030	Nitab4.5_0006360g0010					Nitab4.5_0003156g0110			Nitab4.5_0001078g0140	Nitab4.5_0006537g0020		Nitab4.5_0001035g0010	Nitab4.5_0000548g0210		Nitab4.5_0001530g0150	Nitab4.5_0001935g0040					Nitab4.5_0003908g0010				Nitab4.5_0003082g0020								Nitab4.5_0009044g0040	Nitab4.5_0000050g0150
Nitab4.5_0007011g0010	Nitab4.5_0000101g0160		Nitab4.5_0000461g0190	Nitab4.5_0012102g0020		Nitab4.5_0001368g0010	Nitab4.5_0025775g0010		Nitab4.5_0002773g0080			Nitab4.5_0000307g0120	Nitab4.5_0000183g0030		Nitab4.5_0005560g0040	Nitab4.5_0006852g0070					Nitab4.5_0000116g0070			Nitab4.5_0007011g0010	Nitab4.5_0013117g0010		Nitab4.5_0006557g0020	Nitab4.5_0003781g0070		Nitab4.5_0001651g0040	Nitab4.5_0005597g0020					Nitab4.5_0001542g0020				Nitab4.5_0003537g0060								Nitab4.5_0007322g0010	Nitab4.5_0000185g0190
Nitab4.5_0000486g0050	Nitab4.5_0000496g0160		Nitab4.5_0003876g0010	Nitab4.5_0000034g0020		Nitab4.5_0007762g0010	Nitab4.5_0002656g0060		Nitab4.5_0008580g0020			Nitab4.5_0002527g0030	Nitab4.5_0004146g0020		Nitab4.5_0006822g0020	Nitab4.5_0001263g0020					Nitab4.5_0000091g0320			Nitab4.5_0000486g0050	Nitab4.5_0000354g0180		Nitab4.5_0010913g0020	Nitab4.5_0003626g0120		Nitab4.5_0002153g0080	Nitab4.5_0000021g1000					Nitab4.5_0003771g0020				Nitab4.5_0003721g0040								Nitab4.5_0002522g0070	Nitab4.5_0000330g0040
Nitab4.5_0011256g0010	Nitab4.5_0000747g0050		Nitab4.5_0000033g0310	Nitab4.5_0001674g0010		Nitab4.5_0001557g0030	Nitab4.5_0008656g0030		Nitab4.5_0000505g0110			Nitab4.5_0000785g0120	Nitab4.5_0009849g0020		Nitab4.5_0007566g0010	Nitab4.5_0002456g0030					Nitab4.5_0005180g0040			Nitab4.5_0000312g0150	Nitab4.5_0000886g0120		Nitab4.5_0001267g0020	Nitab4.5_0007327g0030		Nitab4.5_0002481g0020	Nitab4.5_0002322g0090					Nitab4.5_0004389g0070				Nitab4.5_0003722g0050								Nitab4.5_0008037g0020	Nitab4.5_0000415g0070
Nitab4.5_0005421g0010	Nitab4.5_0002096g0070		Nitab4.5_0000366g0010	Nitab4.5_0002783g0140		Nitab4.5_0000200g0220	Nitab4.5_0004313g0030		Nitab4.5_0000202g0470			Nitab4.5_0004785g0030	Nitab4.5_0001822g0060		Nitab4.5_0008073g0010	Nitab4.5_0003823g0050					Nitab4.5_0007351g0020			Nitab4.5_0006920g0030	Nitab4.5_0002700g0100		Nitab4.5_0003822g0010	Nitab4.5_0006294g0090		Nitab4.5_0002579g0030	Nitab4.5_0011429g0030					Nitab4.5_0006523g0020				Nitab4.5_0003860g0050								Nitab4.5_0000143g0070	Nitab4.5_0000472g0340
Nitab4.5_0013050g0010	Nitab4.5_0004575g0050		Nitab4.5_0000944g0100	Nitab4.5_0012895g0010		Nitab4.5_0000836g0020	Nitab4.5_0008137g0050		Nitab4.5_0000008g0130			Nitab4.5_0000306g0170	Nitab4.5_0003976g0050		Nitab4.5_0008189g0010	Nitab4.5_0000402g0080					Nitab4.5_0022027g0010			Nitab4.5_0005421g0010	Nitab4.5_0003300g0080		Nitab4.5_0002055g0020	Nitab4.5_0000373g0010		Nitab4.5_0004038g0030	Nitab4.5_0008303g0010					Nitab4.5_0002618g0010				Nitab4.5_0004471g0060								Nitab4.5_0001287g0140	Nitab4.5_0000596g0010
Nitab4.5_0000123g0220	Nitab4.5_0000754g0310		Nitab4.5_0001197g0010	Nitab4.5_0002140g0060		Nitab4.5_0004287g0060	Nitab4.5_0001552g0140		Nitab4.5_0000913g0050			Nitab4.5_0002205g0020	Nitab4.5_0005873g0020		Nitab4.5_0008809g0010	Nitab4.5_0002720g0050					Nitab4.5_0001664g0050			Nitab4.5_0003052g0050	Nitab4.5_0003481g0010		Nitab4.5_0005487g0010	Nitab4.5_0007034g0010		Nitab4.5_0006358g0080	Nitab4.5_0000505g0070					Nitab4.5_0003638g0010				Nitab4.5_0004776g0090								Nitab4.5_0002177g0170	Nitab4.5_0000718g0130
Nitab4.5_0000166g0050	Nitab4.5_0001988g0040		Nitab4.5_0002516g0050	Nitab4.5_0000015g0370		Nitab4.5_0002113g0180	Nitab4.5_0002112g0080		Nitab4.5_0004905g0070			Nitab4.5_0002889g0050	Nitab4.5_0010538g0010		Nitab4.5_0010151g0030	Nitab4.5_0000576g0020					Nitab4.5_0001651g0020			Nitab4.5_0000062g0280	Nitab4.5_0004738g0040		Nitab4.5_0010461g0020	Nitab4.5_0001499g0030			Nitab4.5_0004342g0010					Nitab4.5_0009910g0010				Nitab4.5_0005560g0030								Nitab4.5_0003443g0060	Nitab4.5_0000718g0150
Nitab4.5_0001607g0050	Nitab4.5_0002096g0080		Nitab4.5_0003074g0090	Nitab4.5_0011386g0010		Nitab4.5_0011667g0010	Nitab4.5_0009394g0040		Nitab4.5_0010004g0040			Nitab4.5_0014089g0010	Nitab4.5_0001552g0120		Nitab4.5_0010215g0010	Nitab4.5_0000886g0070					Nitab4.5_0002708g0020			Nitab4.5_0000123g0220	Nitab4.5_0005808g0080		Nitab4.5_0000375g0170	Nitab4.5_0001752g0020			Nitab4.5_0003268g0030					Nitab4.5_0004881g0040				Nitab4.5_0006318g0040								Nitab4.5_0004452g0040	Nitab4.5_0001033g0020
Nitab4.5_0000467g0150	Nitab4.5_0002096g0120		Nitab4.5_0004965g0020	Nitab4.5_0003151g0060		Nitab4.5_0000068g0400	Nitab4.5_0003897g0010		Nitab4.5_0001764g0070			Nitab4.5_0000785g0100	Nitab4.5_0000195g0010		Nitab4.5_0010289g0010	Nitab4.5_0002175g0060					Nitab4.5_0004728g0070			Nitab4.5_0001270g0170	Nitab4.5_0007797g0020		Nitab4.5_0004594g0090	Nitab4.5_0000032g0050			Nitab4.5_0000461g0040					Nitab4.5_0000143g0240				Nitab4.5_0006788g0020								Nitab4.5_0012487g0030	Nitab4.5_0001049g0030
Nitab4.5_0007927g0010	Nitab4.5_0004522g0030		Nitab4.5_0008663g0020	Nitab4.5_0014561g0010		Nitab4.5_0006516g0020	Nitab4.5_0001229g0050		Nitab4.5_0008141g0020			Nitab4.5_0004785g0020	Nitab4.5_0000304g0030		Nitab4.5_0011569g0040	Nitab4.5_0000978g0140					Nitab4.5_0007491g0020			Nitab4.5_0001607g0050	Nitab4.5_0000380g0230		Nitab4.5_0001225g0250	Nitab4.5_0006691g0030			Nitab4.5_0002018g0020					Nitab4.5_0000143g0110				Nitab4.5_0007031g0010								Nitab4.5_0002656g0060	Nitab4.5_0001657g0060
Nitab4.5_0002978g0120	Nitab4.5_0007761g0010		Nitab4.5_0009781g0010	Nitab4.5_0000078g0010		Nitab4.5_0008039g0010	Nitab4.5_0000650g0100		Nitab4.5_0002297g0080			Nitab4.5_0000031g0530	Nitab4.5_0000495g0070		Nitab4.5_0012256g0020	Nitab4.5_0000032g0220					Nitab4.5_0003794g0090			Nitab4.5_0001664g0080	Nitab4.5_0002706g0030		Nitab4.5_0002005g0020	Nitab4.5_0000944g0040			Nitab4.5_0002498g0040					Nitab4.5_0011657g0020				Nitab4.5_0007490g0050								Nitab4.5_0000694g0020	Nitab4.5_0002427g0060
Nitab4.5_0000255g0340	Nitab4.5_0007761g0020		Nitab4.5_0015741g0010	Nitab4.5_0000351g0140		Nitab4.5_0000103g0280	Nitab4.5_0001894g0010		Nitab4.5_0002817g0010			Nitab4.5_0000338g0010	Nitab4.5_0002860g0010		Nitab4.5_0012894g0010	Nitab4.5_0008185g0010					Nitab4.5_0002064g0040			Nitab4.5_0002978g0120	Nitab4.5_0000214g0140		Nitab4.5_0005620g0040	Nitab4.5_0001464g0020			Nitab4.5_0003139g0100					Nitab4.5_0001668g0080				Nitab4.5_0008336g0030								Nitab4.5_0001438g0020	Nitab4.5_0003275g0010
Nitab4.5_0010678g0010	Nitab4.5_0009826g0020			Nitab4.5_0000789g0130		Nitab4.5_0000687g0050	Nitab4.5_0005646g0010		Nitab4.5_0000319g0220			Nitab4.5_0002354g0090	Nitab4.5_0004009g0040		Nitab4.5_0000316g0350	Nitab4.5_0008185g0020					Nitab4.5_0009242g0010			Nitab4.5_0000255g0340	Nitab4.5_0000208g0320		Nitab4.5_0006469g0010	Nitab4.5_0009242g0010			Nitab4.5_0004439g0060					Nitab4.5_0000205g0160				Nitab4.5_0008526g0010								Nitab4.5_0002909g0010	Nitab4.5_0004456g0030
Nitab4.5_0000343g0240	Nitab4.5_0000516g0130			Nitab4.5_0006288g0010		Nitab4.5_0001372g0100	Nitab4.5_0022449g0010		Nitab4.5_0001318g0050			Nitab4.5_0008517g0020	Nitab4.5_0004944g0030		Nitab4.5_0000341g0010	Nitab4.5_0003412g0010					Nitab4.5_0001584g0120			Nitab4.5_0010678g0010	Nitab4.5_0006154g0010		Nitab4.5_0004398g0080	Nitab4.5_0014511g0010			Nitab4.5_0006455g0040					Nitab4.5_0003139g0090				Nitab4.5_0011079g0020								Nitab4.5_0003796g0060	Nitab4.5_0004456g0050
Nitab4.5_0001981g0040	Nitab4.5_0003113g0120			Nitab4.5_0005622g0010		Nitab4.5_0000412g0050	Nitab4.5_0005664g0030		Nitab4.5_0006389g0020			Nitab4.5_0008957g0020	Nitab4.5_0008145g0010		Nitab4.5_0000446g0210	Nitab4.5_0001968g0140					Nitab4.5_0000057g0160			Nitab4.5_0000343g0240	Nitab4.5_0009137g0010		Nitab4.5_0000234g0090	Nitab4.5_0023782g0010			Nitab4.5_0004423g0010					Nitab4.5_0019254g0010				Nitab4.5_0013642g0020								Nitab4.5_0004665g0050	Nitab4.5_0004703g0020
Nitab4.5_0002139g0060	Nitab4.5_0003487g0100			Nitab4.5_0001777g0020		Nitab4.5_0000573g0170	Nitab4.5_0005582g0080		Nitab4.5_0000463g0020			Nitab4.5_0002824g0080	Nitab4.5_0012411g0010		Nitab4.5_0000540g0320	Nitab4.5_0000550g0100					Nitab4.5_0000068g0400			Nitab4.5_0001981g0040	Nitab4.5_0000732g0140		Nitab4.5_0000731g0010	Nitab4.5_0002113g0180			Nitab4.5_0000130g0050					Nitab4.5_0000451g0110				Nitab4.5_0026398g0010								Nitab4.5_0000092g0370	Nitab4.5_0006220g0010
Nitab4.5_0002963g0030	Nitab4.5_0000319g0260			Nitab4.5_0002823g0100		Nitab4.5_0007082g0010	Nitab4.5_0006134g0090		Nitab4.5_0000637g0030			Nitab4.5_0001467g0140	Nitab4.5_0000496g0160		Nitab4.5_0002704g0040	Nitab4.5_0002154g0010					Nitab4.5_0001769g0160			Nitab4.5_0002139g0060	Nitab4.5_0022569g0020		Nitab4.5_0008177g0020	Nitab4.5_0011667g0010			Nitab4.5_0000375g0050					Nitab4.5_0005767g0030				Nitab4.5_0002750g0020								Nitab4.5_0005281g0050	Nitab4.5_0008928g0010
Nitab4.5_0003037g0050	Nitab4.5_0002441g0020			Nitab4.5_0000114g0140		Nitab4.5_0010993g0020	Nitab4.5_0000736g0080		Nitab4.5_0002700g0150			Nitab4.5_0008533g0020	Nitab4.5_0000747g0050		Nitab4.5_0006202g0040	Nitab4.5_0001263g0040					Nitab4.5_0002163g0070			Nitab4.5_0002963g0030	Nitab4.5_0011368g0030		Nitab4.5_0000413g0140	Nitab4.5_0000068g0400			Nitab4.5_0000463g0010					Nitab4.5_0000850g0070				Nitab4.5_0003534g0040								Nitab4.5_0002986g0060	Nitab4.5_0010164g0010
Nitab4.5_0003139g0050	Nitab4.5_0003981g0070			Nitab4.5_0002081g0010		Nitab4.5_0001170g0160	Nitab4.5_0000839g0130		Nitab4.5_0003969g0060			Nitab4.5_0001801g0050	Nitab4.5_0000913g0060		Nitab4.5_0000374g0050	Nitab4.5_0012105g0010					Nitab4.5_0005769g0080			Nitab4.5_0003139g0050	Nitab4.5_0004387g0030		Nitab4.5_0001438g0180	Nitab4.5_0003179g0030			Nitab4.5_0000705g0120					Nitab4.5_0000153g0080				Nitab4.5_0004348g0010								Nitab4.5_0016574g0010
Nitab4.5_0004470g0020	Nitab4.5_0006562g0070			Nitab4.5_0001031g0280		Nitab4.5_0008145g0020	Nitab4.5_0001200g0050		Nitab4.5_0005256g0020			Nitab4.5_0005490g0020	Nitab4.5_0001707g0020		Nitab4.5_0009181g0010	Nitab4.5_0000058g0010					Nitab4.5_0008039g0010			Nitab4.5_0004273g0010	Nitab4.5_0000525g0110		Nitab4.5_0005673g0030	Nitab4.5_0003212g0030			Nitab4.5_0006115g0050					Nitab4.5_0000232g0160				Nitab4.5_0007278g0030								Nitab4.5_0000143g0190
Nitab4.5_0009821g0020	Nitab4.5_0007284g0020			Nitab4.5_0008889g0020		Nitab4.5_0000228g0120	Nitab4.5_0002566g0030		Nitab4.5_0008522g0060			Nitab4.5_0000476g0080	Nitab4.5_0004575g0050		Nitab4.5_0001559g0010	Nitab4.5_0001817g0010					Nitab4.5_0000103g0280			Nitab4.5_0004470g0020	Nitab4.5_0004203g0030		Nitab4.5_0008438g0040	Nitab4.5_0008039g0010			Nitab4.5_0010117g0020					Nitab4.5_0000081g0200				Nitab4.5_0003850g0040								Nitab4.5_0000512g0050
Nitab4.5_0011581g0010	Nitab4.5_0000566g0010			Nitab4.5_0001383g0100		Nitab4.5_0000367g0060	Nitab4.5_0000202g0160		Nitab4.5_0012489g0020			Nitab4.5_0000028g0050	Nitab4.5_0000692g0170		Nitab4.5_0008543g0010	Nitab4.5_0001905g0010					Nitab4.5_0000687g0050			Nitab4.5_0009821g0020	Nitab4.5_0001606g0030		Nitab4.5_0013295g0010	Nitab4.5_0008488g0010			Nitab4.5_0014356g0020					Nitab4.5_0001081g0060				Nitab4.5_0013867g0010								Nitab4.5_0002954g0050
Nitab4.5_0003020g0170	Nitab4.5_0001172g0040			Nitab4.5_0001780g0070		Nitab4.5_0000015g0370	Nitab4.5_0005313g0040		Nitab4.5_0000082g0150			Nitab4.5_0007881g0010	Nitab4.5_0000754g0310		Nitab4.5_0003739g0010	Nitab4.5_0006148g0040					Nitab4.5_0001372g0100			Nitab4.5_0011581g0010	Nitab4.5_0001957g0010		Nitab4.5_0000572g0120	Nitab4.5_0000103g0280			Nitab4.5_0000008g0820					Nitab4.5_0003511g0010				Nitab4.5_0025760g0010								Nitab4.5_0000357g0200
Nitab4.5_0013122g0010	Nitab4.5_0003515g0020			Nitab4.5_0001759g0070		Nitab4.5_0003828g0010	Nitab4.5_0000173g0130		Nitab4.5_0002158g0140			Nitab4.5_0000899g0130	Nitab4.5_0001332g0050		Nitab4.5_0002538g0090	Nitab4.5_0013425g0030					Nitab4.5_0002938g0010			Nitab4.5_0017683g0010	Nitab4.5_0011157g0010		Nitab4.5_0000084g0380	Nitab4.5_0000103g0310			Nitab4.5_0007563g0020					Nitab4.5_0000621g0050				Nitab4.5_0001232g0120								Nitab4.5_0000900g0120
Nitab4.5_0002150g0140	Nitab4.5_0007840g0030			Nitab4.5_0002224g0130		Nitab4.5_0001519g0130	Nitab4.5_0002963g0020		Nitab4.5_0002839g0010			Nitab4.5_0005519g0040	Nitab4.5_0001988g0040		Nitab4.5_0003167g0100	Nitab4.5_0001739g0010					Nitab4.5_0000412g0050			Nitab4.5_0003020g0170	Nitab4.5_0012044g0010		Nitab4.5_0000572g0060	Nitab4.5_0000958g0020			Nitab4.5_0001601g0030					Nitab4.5_0001277g0080				Nitab4.5_0011123g0020								Nitab4.5_0002214g0050
Nitab4.5_0002306g0020	Nitab4.5_0001727g0100			Nitab4.5_0007769g0010		Nitab4.5_0002642g0070	Nitab4.5_0002158g0030		Nitab4.5_0004775g0060			Nitab4.5_0012799g0010	Nitab4.5_0002096g0080		Nitab4.5_0003873g0020	Nitab4.5_0006148g0060					Nitab4.5_0001984g0010			Nitab4.5_0013122g0010	Nitab4.5_0002522g0040		Nitab4.5_0000572g0110	Nitab4.5_0006269g0010			Nitab4.5_0007963g0040					Nitab4.5_0000368g0080				Nitab4.5_0002944g0100								Nitab4.5_0002531g0040
Nitab4.5_0000015g0160	Nitab4.5_0005120g0070			Nitab4.5_0009733g0010		Nitab4.5_0007512g0030	Nitab4.5_0000494g0090		Nitab4.5_0000588g0260			Nitab4.5_0003885g0020	Nitab4.5_0002096g0120		Nitab4.5_0009216g0010	Nitab4.5_0000525g0130					Nitab4.5_0000573g0170			Nitab4.5_0002306g0020	Nitab4.5_0004567g0080		Nitab4.5_0004979g0130	Nitab4.5_0007026g0040			Nitab4.5_0002338g0020					Nitab4.5_0005883g0030				Nitab4.5_0006094g0010								Nitab4.5_0002815g0110
Nitab4.5_0000307g0120	Nitab4.5_0005919g0040			Nitab4.5_0001099g0050		Nitab4.5_0001078g0010	Nitab4.5_0008278g0010		Nitab4.5_0003567g0010			Nitab4.5_0000109g0360	Nitab4.5_0004522g0030		Nitab4.5_0009771g0010	Nitab4.5_0002043g0080					Nitab4.5_0002354g0140			Nitab4.5_0004389g0030	Nitab4.5_0009196g0020		Nitab4.5_0014731g0010	Nitab4.5_0010468g0010			Nitab4.5_0005830g0010					Nitab4.5_0005323g0010				Nitab4.5_0000957g0170								Nitab4.5_0005392g0070
Nitab4.5_0002527g0030	Nitab4.5_0003251g0040			Nitab4.5_0010145g0010		Nitab4.5_0002081g0010	Nitab4.5_0001085g0160		Nitab4.5_0000145g0180			Nitab4.5_0004203g0060	Nitab4.5_0007761g0010		Nitab4.5_0000838g0160	Nitab4.5_0001239g0050					Nitab4.5_0010993g0020			Nitab4.5_0000307g0120	Nitab4.5_0000134g0080		Nitab4.5_0003020g0040	Nitab4.5_0012115g0020			Nitab4.5_0003053g0010					Nitab4.5_0011862g0010				Nitab4.5_0002882g0050								Nitab4.5_0005646g0010
Nitab4.5_0002044g0020	Nitab4.5_0003401g0080			Nitab4.5_0006398g0030		Nitab4.5_0002081g0060	Nitab4.5_0003291g0010		Nitab4.5_0000308g0230			Nitab4.5_0010194g0010	Nitab4.5_0007761g0020		Nitab4.5_0002733g0020	Nitab4.5_0012375g0030					Nitab4.5_0000655g0030			Nitab4.5_0002527g0030	Nitab4.5_0001209g0010		Nitab4.5_0003337g0060	Nitab4.5_0001190g0020			Nitab4.5_0000187g0220					Nitab4.5_0000601g0040				Nitab4.5_0009215g0010								Nitab4.5_0009329g0010
Nitab4.5_0000785g0120	Nitab4.5_0004556g0030			Nitab4.5_0007026g0010		Nitab4.5_0000096g0270	Nitab4.5_0000267g0090		Nitab4.5_0003526g0060			Nitab4.5_0002424g0010	Nitab4.5_0010792g0020		Nitab4.5_0005128g0020	Nitab4.5_0010758g0040					Nitab4.5_0000228g0120			Nitab4.5_0000106g0430	Nitab4.5_0006474g0020		Nitab4.5_0000818g0070	Nitab4.5_0004841g0050			Nitab4.5_0002227g0020					Nitab4.5_0001585g0010				Nitab4.5_0000874g0020								Nitab4.5_0002920g0050
Nitab4.5_0004785g0030	Nitab4.5_0000158g0060			Nitab4.5_0007026g0020		Nitab4.5_0004046g0030	Nitab4.5_0000527g0250		Nitab4.5_0000218g0070			Nitab4.5_0018322g0010	Nitab4.5_0009826g0020		Nitab4.5_0001582g0020	Nitab4.5_0000003g0740					Nitab4.5_0002535g0030			Nitab4.5_0002044g0020	Nitab4.5_0000131g0370		Nitab4.5_0000476g0010	Nitab4.5_0011165g0010			Nitab4.5_0009454g0010					Nitab4.5_0000252g0010				Nitab4.5_0000426g0050								Nitab4.5_0003277g0010
Nitab4.5_0000125g0380	Nitab4.5_0000110g0100			Nitab4.5_0000029g0110		Nitab4.5_0010777g0020	Nitab4.5_0006815g0040		Nitab4.5_0001183g0090			Nitab4.5_0000209g0290	Nitab4.5_0003113g0120		Nitab4.5_0000888g0130	Nitab4.5_0000029g0210					Nitab4.5_0005897g0040			Nitab4.5_0000785g0120	Nitab4.5_0008771g0010		Nitab4.5_0004853g0010	Nitab4.5_0000113g0010			Nitab4.5_0000978g0070					Nitab4.5_0001059g0030				Nitab4.5_0010551g0010								Nitab4.5_0000143g0480
Nitab4.5_0000306g0170	Nitab4.5_0002282g0030			Nitab4.5_0000136g0190		Nitab4.5_0007154g0010	Nitab4.5_0003076g0080		Nitab4.5_0001200g0090			Nitab4.5_0004575g0040	Nitab4.5_0007800g0010		Nitab4.5_0000888g0140	Nitab4.5_0001207g0080					Nitab4.5_0001456g0060			Nitab4.5_0004785g0030	Nitab4.5_0000183g0030		Nitab4.5_0001375g0040	Nitab4.5_0005555g0010			Nitab4.5_0001937g0010					Nitab4.5_0002109g0010				Nitab4.5_0000012g0010								Nitab4.5_0000143g0160
Nitab4.5_0002205g0020	Nitab4.5_0006540g0040			Nitab4.5_0000192g0130		Nitab4.5_0007254g0050	Nitab4.5_0013415g0020		Nitab4.5_0000604g0030			Nitab4.5_0007886g0020	Nitab4.5_0000319g0260		Nitab4.5_0003951g0020	Nitab4.5_0004389g0070					Nitab4.5_0013146g0020			Nitab4.5_0000306g0170	Nitab4.5_0004146g0020		Nitab4.5_0003160g0080	Nitab4.5_0002606g0010			Nitab4.5_0000091g0320					Nitab4.5_0002535g0030				Nitab4.5_0000020g0210								Nitab4.5_0000013g0380
Nitab4.5_0002889g0050	Nitab4.5_0011041g0020			Nitab4.5_0000192g0140		Nitab4.5_0000786g0210	Nitab4.5_0011437g0010		Nitab4.5_0001119g0070			Nitab4.5_0000766g0090	Nitab4.5_0003981g0070		Nitab4.5_0001315g0170	Nitab4.5_0000181g0170					Nitab4.5_0012787g0030			Nitab4.5_0002205g0020	Nitab4.5_0004513g0040		Nitab4.5_0001194g0010	Nitab4.5_0001674g0010			Nitab4.5_0000462g0040					Nitab4.5_0002567g0050				Nitab4.5_0000037g0370								Nitab4.5_0000013g0390
Nitab4.5_0014089g0010	Nitab4.5_0003419g0050			Nitab4.5_0000263g0180		Nitab4.5_0000786g0230	Nitab4.5_0003275g0050		Nitab4.5_0001439g0060			Nitab4.5_0001897g0020	Nitab4.5_0006348g0020		Nitab4.5_0000003g0150	Nitab4.5_0001541g0050					Nitab4.5_0009003g0030			Nitab4.5_0002889g0050	Nitab4.5_0005180g0050		Nitab4.5_0000006g0090	Nitab4.5_0011862g0010			Nitab4.5_0000808g0010					Nitab4.5_0003134g0010				Nitab4.5_0000074g0190								Nitab4.5_0003284g0010
Nitab4.5_0000785g0100	Nitab4.5_0002120g0020			Nitab4.5_0000723g0170		Nitab4.5_0000786g0240	Nitab4.5_0000212g0210		Nitab4.5_0000470g0170			Nitab4.5_0000319g0270	Nitab4.5_0008453g0010		Nitab4.5_0001301g0070	Nitab4.5_0004086g0040					Nitab4.5_0001373g0090			Nitab4.5_0004070g0030	Nitab4.5_0000417g0130		Nitab4.5_0000787g0190	Nitab4.5_0005041g0020			Nitab4.5_0001542g0020					Nitab4.5_0003930g0050				Nitab4.5_0000330g0040								Nitab4.5_0003284g0040
Nitab4.5_0004785g0020	Nitab4.5_0011108g0010			Nitab4.5_0001289g0020		Nitab4.5_0001921g0030	Nitab4.5_0000005g0120		Nitab4.5_0000059g0310			Nitab4.5_0001993g0060	Nitab4.5_0006562g0070		Nitab4.5_0008811g0010	Nitab4.5_0001823g0020					Nitab4.5_0006861g0010			Nitab4.5_0006089g0060	Nitab4.5_0001843g0170		Nitab4.5_0000095g0170	Nitab4.5_0003696g0090			Nitab4.5_0001629g0070					Nitab4.5_0000638g0170				Nitab4.5_0000550g0060								Nitab4.5_0011467g0030
Nitab4.5_0000338g0010	Nitab4.5_0001255g0020			Nitab4.5_0001289g0040		Nitab4.5_0004874g0010	Nitab4.5_0000027g0500		Nitab4.5_0000839g0070			Nitab4.5_0004740g0030	Nitab4.5_0007284g0020		Nitab4.5_0000315g0120	Nitab4.5_0003680g0030					Nitab4.5_0001754g0010			Nitab4.5_0014089g0010	Nitab4.5_0001552g0120		Nitab4.5_0003746g0020	Nitab4.5_0012606g0030			Nitab4.5_0000170g0270					Nitab4.5_0002929g0030				Nitab4.5_0001587g0100								Nitab4.5_0005392g0020
Nitab4.5_0002354g0090	Nitab4.5_0007348g0010			Nitab4.5_0001329g0040		Nitab4.5_0005755g0010	Nitab4.5_0000305g0360		Nitab4.5_0006024g0010			Nitab4.5_0015425g0010	Nitab4.5_0000566g0010		Nitab4.5_0012857g0010	Nitab4.5_0000634g0220					Nitab4.5_0000114g0140			Nitab4.5_0000785g0100	Nitab4.5_0010565g0020		Nitab4.5_0007383g0010	Nitab4.5_0011134g0010			Nitab4.5_0001892g0040					Nitab4.5_0007063g0070				Nitab4.5_0001610g0030								Nitab4.5_0011544g0050
Nitab4.5_0000103g0340	Nitab4.5_0000191g0030			Nitab4.5_0004708g0050		Nitab4.5_0005755g0020	Nitab4.5_0000343g0200		Nitab4.5_0006232g0010			Nitab4.5_0010275g0010	Nitab4.5_0001172g0040		Nitab4.5_0001888g0030	Nitab4.5_0001186g0050					Nitab4.5_0004197g0020			Nitab4.5_0004785g0020	Nitab4.5_0002160g0090		Nitab4.5_0001617g0020	Nitab4.5_0001194g0060			Nitab4.5_0003564g0050					Nitab4.5_0005163g0060				Nitab4.5_0002579g0030								Nitab4.5_0007169g0010
Nitab4.5_0002737g0020	Nitab4.5_0000784g0030			Nitab4.5_0006269g0030		Nitab4.5_0007987g0010	Nitab4.5_0001122g0040		Nitab4.5_0000073g0270			Nitab4.5_0001438g0070	Nitab4.5_0003515g0020		Nitab4.5_0005116g0010	Nitab4.5_0000143g0110					Nitab4.5_0002081g0060			Nitab4.5_0004112g0010	Nitab4.5_0002801g0020		Nitab4.5_0009228g0010	Nitab4.5_0011386g0010			Nitab4.5_0007327g0030					Nitab4.5_0000561g0070				Nitab4.5_0004661g0040								Nitab4.5_0005100g0050
Nitab4.5_0008517g0020	Nitab4.5_0000185g0250			Nitab4.5_0008954g0050		Nitab4.5_0001423g0140	Nitab4.5_0002252g0110		Nitab4.5_0004234g0080			Nitab4.5_0004475g0010	Nitab4.5_0007840g0030		Nitab4.5_0003263g0040	Nitab4.5_0003626g0120					Nitab4.5_0000310g0220			Nitab4.5_0000565g0130	Nitab4.5_0000195g0010		Nitab4.5_0000314g0030	Nitab4.5_0002168g0010			Nitab4.5_0011657g0020					Nitab4.5_0002149g0060				Nitab4.5_0005255g0010								Nitab4.5_0005226g0020
Nitab4.5_0001419g0010	Nitab4.5_0008709g0010			Nitab4.5_0011461g0020		Nitab4.5_0002848g0030	Nitab4.5_0002379g0010		Nitab4.5_0001471g0010			Nitab4.5_0003636g0010	Nitab4.5_0009819g0010		Nitab4.5_0001580g0040	Nitab4.5_0004450g0010					Nitab4.5_0000440g0170			Nitab4.5_0008213g0070	Nitab4.5_0000304g0030		Nitab4.5_0000314g0060	Nitab4.5_0005161g0140			Nitab4.5_0000147g0350					Nitab4.5_0000237g0070				Nitab4.5_0005592g0010								Nitab4.5_0002221g0040
Nitab4.5_0001832g0090	Nitab4.5_0002269g0030			Nitab4.5_0012071g0010		Nitab4.5_0000101g0180	Nitab4.5_0002861g0020		Nitab4.5_0000339g0150			Nitab4.5_0001040g0170	Nitab4.5_0005919g0040		Nitab4.5_0001581g0010	Nitab4.5_0001291g0070					Nitab4.5_0004123g0030			Nitab4.5_0002354g0090	Nitab4.5_0002860g0010		Nitab4.5_0001662g0020	Nitab4.5_0004301g0060			Nitab4.5_0002456g0130					Nitab4.5_0010186g0010				Nitab4.5_0005713g0030								Nitab4.5_0003481g0070
Nitab4.5_0008533g0020	Nitab4.5_0000010g0130			Nitab4.5_0004874g0010		Nitab4.5_0000101g0210	Nitab4.5_0005722g0040		Nitab4.5_0003040g0010			Nitab4.5_0000319g0090	Nitab4.5_0009512g0030		Nitab4.5_0000661g0070	Nitab4.5_0001668g0120					Nitab4.5_0008779g0030			Nitab4.5_0008517g0020	Nitab4.5_0004009g0040		Nitab4.5_0002209g0240	Nitab4.5_0000114g0140			Nitab4.5_0003691g0070					Nitab4.5_0010789g0020				Nitab4.5_0008368g0010								Nitab4.5_0000143g0060
Nitab4.5_0001801g0050	Nitab4.5_0003234g0040			Nitab4.5_0003600g0020		Nitab4.5_0000142g0340	Nitab4.5_0006286g0060		Nitab4.5_0003040g0040			Nitab4.5_0000319g0100	Nitab4.5_0000006g0280		Nitab4.5_0000291g0060	Nitab4.5_0007661g0020					Nitab4.5_0003771g0010			Nitab4.5_0002824g0080	Nitab4.5_0004944g0030		Nitab4.5_0001662g0030	Nitab4.5_0002081g0010			Nitab4.5_0004646g0050					Nitab4.5_0003512g0020				Nitab4.5_0010037g0010								Nitab4.5_0003816g0120
Nitab4.5_0005490g0020	Nitab4.5_0005634g0080			Nitab4.5_0001889g0160		Nitab4.5_0001099g0060	Nitab4.5_0013213g0010		Nitab4.5_0001495g0130			Nitab4.5_0000319g0150	Nitab4.5_0000315g0190		Nitab4.5_0002401g0010	Nitab4.5_0000373g0010					Nitab4.5_0000041g0140			Nitab4.5_0002225g0080	Nitab4.5_0000190g0020		Nitab4.5_0002495g0050	Nitab4.5_0001477g0050			Nitab4.5_0000399g0100					Nitab4.5_0005611g0020				Nitab4.5_0010473g0030								Nitab4.5_0000143g0310
Nitab4.5_0000476g0080	Nitab4.5_0009512g0040			Nitab4.5_0002345g0080		Nitab4.5_0000775g0160	Nitab4.5_0006787g0030		Nitab4.5_0004423g0010			Nitab4.5_0005040g0030	Nitab4.5_0000158g0060		Nitab4.5_0010022g0010	Nitab4.5_0000743g0030					Nitab4.5_0000096g0270			Nitab4.5_0001419g0010	Nitab4.5_0009109g0060		Nitab4.5_0011714g0010	Nitab4.5_0012245g0050			Nitab4.5_0000667g0170					Nitab4.5_0002661g0020				Nitab4.5_0010943g0010								Nitab4.5_0002214g0110
Nitab4.5_0009003g0020	Nitab4.5_0001295g0040			Nitab4.5_0006475g0040		Nitab4.5_0001041g0060	Nitab4.5_0002586g0080		Nitab4.5_0007090g0020			Nitab4.5_0005040g0040	Nitab4.5_0000110g0100		Nitab4.5_0000044g0100	Nitab4.5_0001464g0020					Nitab4.5_0000905g0050			Nitab4.5_0001467g0140	Nitab4.5_0012411g0010		Nitab4.5_0000156g0210	Nitab4.5_0003771g0010			Nitab4.5_0001936g0040					Nitab4.5_0001905g0040												Nitab4.5_0003030g0060
Nitab4.5_0000028g0050	Nitab4.5_0003460g0040			Nitab4.5_0001622g0160		Nitab4.5_0003171g0010	Nitab4.5_0001920g0070		Nitab4.5_0000023g0480			Nitab4.5_0000241g0190	Nitab4.5_0002282g0030		Nitab4.5_0000600g0050	Nitab4.5_0009242g0010					Nitab4.5_0010008g0010			Nitab4.5_0003037g0140	Nitab4.5_0000101g0160		Nitab4.5_0000209g0020	Nitab4.5_0004217g0080			Nitab4.5_0002739g0070					Nitab4.5_0004906g0010												Nitab4.5_0001438g0090
Nitab4.5_0007881g0010	Nitab4.5_0007429g0030			Nitab4.5_0001791g0030		Nitab4.5_0000901g0110	Nitab4.5_0003503g0020		Nitab4.5_0001495g0070			Nitab4.5_0003888g0010	Nitab4.5_0006540g0040		Nitab4.5_0007739g0010	Nitab4.5_0014511g0010					Nitab4.5_0010096g0020			Nitab4.5_0008533g0020	Nitab4.5_0000496g0160		Nitab4.5_0000755g0140	Nitab4.5_0000363g0190			Nitab4.5_0000593g0080					Nitab4.5_0001060g0010												Nitab4.5_0003076g0080
Nitab4.5_0000899g0130	Nitab4.5_0000154g0310			Nitab4.5_0006449g0010		Nitab4.5_0000008g0500	Nitab4.5_0000761g0110		Nitab4.5_0003603g0090			Nitab4.5_0012818g0010	Nitab4.5_0011041g0020		Nitab4.5_0000376g0050	Nitab4.5_0001301g0080					Nitab4.5_0000166g0100			Nitab4.5_0001801g0050	Nitab4.5_0001771g0090		Nitab4.5_0001244g0140	Nitab4.5_0004979g0080			Nitab4.5_0009242g0010					Nitab4.5_0003325g0010												Nitab4.5_0009934g0020
Nitab4.5_0005519g0040	Nitab4.5_0000031g0400			Nitab4.5_0000483g0270		Nitab4.5_0007254g0040	Nitab4.5_0001190g0010		Nitab4.5_0003768g0030			Nitab4.5_0004905g0080	Nitab4.5_0005428g0070		Nitab4.5_0000423g0060	Nitab4.5_0000159g0040					Nitab4.5_0007712g0010			Nitab4.5_0002261g0030	Nitab4.5_0002096g0070		Nitab4.5_0000073g0500	Nitab4.5_0010955g0020			Nitab4.5_0023782g0010					Nitab4.5_0004579g0030												Nitab4.5_0000143g0510
Nitab4.5_0001988g0030	Nitab4.5_0000795g0060			Nitab4.5_0000109g0170		Nitab4.5_0001531g0050	Nitab4.5_0001190g0030		Nitab4.5_0002257g0090			Nitab4.5_0000110g0540	Nitab4.5_0005720g0020		Nitab4.5_0001728g0050	Nitab4.5_0000953g0030					Nitab4.5_0002195g0020			Nitab4.5_0005490g0020	Nitab4.5_0000119g0210		Nitab4.5_0000364g0030	Nitab4.5_0006398g0030			Nitab4.5_0004280g0120					Nitab4.5_0007488g0040												Nitab4.5_0002940g0010
Nitab4.5_0000109g0360	Nitab4.5_0000884g0020			Nitab4.5_0004835g0030		Nitab4.5_0000525g0290	Nitab4.5_0017147g0010		Nitab4.5_0006574g0010			Nitab4.5_0001466g0090	Nitab4.5_0000761g0100		Nitab4.5_0002334g0100	Nitab4.5_0003518g0010					Nitab4.5_0000099g0080			Nitab4.5_0008016g0010	Nitab4.5_0007422g0010		Nitab4.5_0000636g0070	Nitab4.5_0007026g0010			Nitab4.5_0000664g0320					Nitab4.5_0012245g0040												Nitab4.5_0000157g0040
Nitab4.5_0000187g0160	Nitab4.5_0003893g0030			Nitab4.5_0006630g0020		Nitab4.5_0007322g0010	Nitab4.5_0000276g0050		Nitab4.5_0010695g0040			Nitab4.5_0003783g0030	Nitab4.5_0001255g0020		Nitab4.5_0002584g0030	Nitab4.5_0000070g0110					Nitab4.5_0007254g0050			Nitab4.5_0000476g0080	Nitab4.5_0000754g0310		Nitab4.5_0000636g0120	Nitab4.5_0007026g0020			Nitab4.5_0000556g0040					Nitab4.5_0010728g0020												Nitab4.5_0000143g0100
Nitab4.5_0000209g0290	Nitab4.5_0000137g0200			Nitab4.5_0002543g0010		Nitab4.5_0011052g0010	Nitab4.5_0011330g0010		Nitab4.5_0008536g0040			Nitab4.5_0000525g0160	Nitab4.5_0007348g0010		Nitab4.5_0007495g0030	Nitab4.5_0000766g0070					Nitab4.5_0003875g0010			Nitab4.5_0009003g0020	Nitab4.5_0001332g0050		Nitab4.5_0002570g0020	Nitab4.5_0002671g0110			Nitab4.5_0001031g0090					Nitab4.5_0004117g0030												Nitab4.5_0000143g0300
Nitab4.5_0000525g0140	Nitab4.5_0002762g0010			Nitab4.5_0005466g0020		Nitab4.5_0006816g0030	Nitab4.5_0006802g0040		Nitab4.5_0003738g0070			Nitab4.5_0004798g0070	Nitab4.5_0000191g0030		Nitab4.5_0023116g0010	Nitab4.5_0003212g0030					Nitab4.5_0000786g0210			Nitab4.5_0000028g0050	Nitab4.5_0001988g0040		Nitab4.5_0003307g0010	Nitab4.5_0000029g0110			Nitab4.5_0008644g0010					Nitab4.5_0001544g0040												Nitab4.5_0000143g0290
Nitab4.5_0001044g0060	Nitab4.5_0000241g0100			Nitab4.5_0000749g0130		Nitab4.5_0006999g0030	Nitab4.5_0010558g0040		Nitab4.5_0000906g0020			Nitab4.5_0007628g0040	Nitab4.5_0000784g0030		Nitab4.5_0002577g0030	Nitab4.5_0004530g0020					Nitab4.5_0000786g0230			Nitab4.5_0000899g0130	Nitab4.5_0002096g0080		Nitab4.5_0007542g0020	Nitab4.5_0000192g0140			Nitab4.5_0000103g0280					Nitab4.5_0004278g0010												Nitab4.5_0002214g0060
Nitab4.5_0002424g0010	Nitab4.5_0003827g0040			Nitab4.5_0002007g0010		Nitab4.5_0001604g0090	Nitab4.5_0000751g0140		Nitab4.5_0002227g0020			Nitab4.5_0000051g0160	Nitab4.5_0000185g0250		Nitab4.5_0000375g0030	Nitab4.5_0008488g0010					Nitab4.5_0000786g0240			Nitab4.5_0000799g0050	Nitab4.5_0002096g0120		Nitab4.5_0009048g0020	Nitab4.5_0013816g0010			Nitab4.5_0000103g0310					Nitab4.5_0005793g0050												Nitab4.5_0000027g0580
Nitab4.5_0003159g0010	Nitab4.5_0005930g0040			Nitab4.5_0002783g0040		Nitab4.5_0007306g0010	Nitab4.5_0000091g0430		Nitab4.5_0009454g0010			Nitab4.5_0006278g0020	Nitab4.5_0002269g0030		Nitab4.5_0001894g0060	Nitab4.5_0003820g0040					Nitab4.5_0004874g0010			Nitab4.5_0005519g0040	Nitab4.5_0004522g0030		Nitab4.5_0008535g0020	Nitab4.5_0000241g0260			Nitab4.5_0000958g0020					Nitab4.5_0006239g0030												Nitab4.5_0000044g0140
Nitab4.5_0004203g0060	Nitab4.5_0010797g0030			Nitab4.5_0000064g0080		Nitab4.5_0008001g0030	Nitab4.5_0004821g0030		Nitab4.5_0004449g0050			Nitab4.5_0000040g0280	Nitab4.5_0000469g0090		Nitab4.5_0005295g0010	Nitab4.5_0000444g0200					Nitab4.5_0005755g0010			Nitab4.5_0012799g0010	Nitab4.5_0007761g0010		Nitab4.5_0018057g0010	Nitab4.5_0015205g0010			Nitab4.5_0000573g0170					Nitab4.5_0009778g0010												Nitab4.5_0000057g0320
Nitab4.5_0010194g0010	Nitab4.5_0000036g0390			Nitab4.5_0001849g0020		Nitab4.5_0000515g0030	Nitab4.5_0022362g0010		Nitab4.5_0000137g0100			Nitab4.5_0008527g0020	Nitab4.5_0003234g0040		Nitab4.5_0006805g0010	Nitab4.5_0001777g0040					Nitab4.5_0005755g0020			Nitab4.5_0000845g0160	Nitab4.5_0007761g0020		Nitab4.5_0000694g0160	Nitab4.5_0005691g0010			Nitab4.5_0007026g0040					Nitab4.5_0010777g0020												Nitab4.5_0000143g0180
Nitab4.5_0018322g0010	Nitab4.5_0000354g0040			Nitab4.5_0002918g0030		Nitab4.5_0011952g0010	Nitab4.5_0004275g0010		Nitab4.5_0003156g0110			Nitab4.5_0000451g0050	Nitab4.5_0008523g0030		Nitab4.5_0000600g0060	Nitab4.5_0000103g0280					Nitab4.5_0001423g0140			Nitab4.5_0003159g0010	Nitab4.5_0010792g0020		Nitab4.5_0002112g0040	Nitab4.5_0007987g0010			Nitab4.5_0002380g0120					Nitab4.5_0001707g0080												Nitab4.5_0000143g0370
Nitab4.5_0004575g0040	Nitab4.5_0000377g0210			Nitab4.5_0008353g0010		Nitab4.5_0021719g0010	Nitab4.5_0000171g0250		Nitab4.5_0000164g0200			Nitab4.5_0000867g0010	Nitab4.5_0009463g0020		Nitab4.5_0007739g0040	Nitab4.5_0012115g0020					Nitab4.5_0010115g0020			Nitab4.5_0004203g0060	Nitab4.5_0004414g0030		Nitab4.5_0002773g0080	Nitab4.5_0006457g0020			Nitab4.5_0000337g0110					Nitab4.5_0001780g0010												Nitab4.5_0000143g0420
Nitab4.5_0000040g0360	Nitab4.5_0000606g0020			Nitab4.5_0000413g0220		Nitab4.5_0007335g0030	Nitab4.5_0000383g0280		Nitab4.5_0000091g0320			Nitab4.5_0003140g0010	Nitab4.5_0009512g0040		Nitab4.5_0001004g0220	Nitab4.5_0001780g0060					Nitab4.5_0001876g0030			Nitab4.5_0010194g0010	Nitab4.5_0009826g0020		Nitab4.5_0001726g0110	Nitab4.5_0002345g0080			Nitab4.5_0000742g0010					Nitab4.5_0001780g0050												Nitab4.5_0000222g0250
Nitab4.5_0000766g0090	Nitab4.5_0001542g0060			Nitab4.5_0004153g0040		Nitab4.5_0007475g0010	Nitab4.5_0000471g0140		Nitab4.5_0001506g0090			Nitab4.5_0000271g0020	Nitab4.5_0001295g0040		Nitab4.5_0005506g0020	Nitab4.5_0000920g0110					Nitab4.5_0000142g0340			Nitab4.5_0018322g0010	Nitab4.5_0028110g0010		Nitab4.5_0001712g0030	Nitab4.5_0006475g0040			Nitab4.5_0000567g0030					Nitab4.5_0011816g0010												Nitab4.5_0000874g0170
Nitab4.5_0001897g0020	Nitab4.5_0001975g0030			Nitab4.5_0000433g0070		Nitab4.5_0003298g0070	Nitab4.5_0000670g0070		Nitab4.5_0003837g0020			Nitab4.5_0001006g0040	Nitab4.5_0003460g0040		Nitab4.5_0001035g0010	Nitab4.5_0001687g0030					Nitab4.5_0001041g0060			Nitab4.5_0004575g0040	Nitab4.5_0003113g0120		Nitab4.5_0000008g0190	Nitab4.5_0002420g0030			Nitab4.5_0000034g0020					Nitab4.5_0000457g0080												Nitab4.5_0000914g0280
Nitab4.5_0000319g0270	Nitab4.5_0003180g0060			Nitab4.5_0000006g0290		Nitab4.5_0005144g0010	Nitab4.5_0001777g0030		Nitab4.5_0000194g0170			Nitab4.5_0001006g0050	Nitab4.5_0007429g0030		Nitab4.5_0008106g0010	Nitab4.5_0006415g0030					Nitab4.5_0001764g0100			Nitab4.5_0000040g0360	Nitab4.5_0003487g0100		Nitab4.5_0000519g0150	Nitab4.5_0000134g0030			Nitab4.5_0001474g0050					Nitab4.5_0000475g0010												Nitab4.5_0001303g0030
Nitab4.5_0001993g0060	Nitab4.5_0003464g0030			Nitab4.5_0000319g0050		Nitab4.5_0000418g0130	Nitab4.5_0002184g0070		Nitab4.5_0005180g0040			Nitab4.5_0008080g0020	Nitab4.5_0000154g0310		Nitab4.5_0004492g0010	Nitab4.5_0006367g0020					Nitab4.5_0003171g0010			Nitab4.5_0000766g0090	Nitab4.5_0007800g0010		Nitab4.5_0002172g0020	Nitab4.5_0001791g0030			Nitab4.5_0002198g0060					Nitab4.5_0000156g0030												Nitab4.5_0001668g0040
Nitab4.5_0015425g0010	Nitab4.5_0006850g0020			Nitab4.5_0002145g0060		Nitab4.5_0006992g0010	Nitab4.5_0002740g0090		Nitab4.5_0007351g0020			Nitab4.5_0017675g0010	Nitab4.5_0003052g0040		Nitab4.5_0010913g0020	Nitab4.5_0012102g0010					Nitab4.5_0000901g0110			Nitab4.5_0003212g0020	Nitab4.5_0000319g0260		Nitab4.5_0001229g0010	Nitab4.5_0000091g0360			Nitab4.5_0001674g0010					Nitab4.5_0001088g0020												Nitab4.5_0002081g0100
Nitab4.5_0010275g0010	Nitab4.5_0012767g0010			Nitab4.5_0001029g0090		Nitab4.5_0000246g0290	Nitab4.5_0003513g0010		Nitab4.5_0000239g0100			Nitab4.5_0000396g0230	Nitab4.5_0000795g0060		Nitab4.5_0000349g0330	Nitab4.5_0012102g0020					Nitab4.5_0000008g0500			Nitab4.5_0000319g0270	Nitab4.5_0003981g0070		Nitab4.5_0005960g0010	Nitab4.5_0000914g0300			Nitab4.5_0002783g0140					Nitab4.5_0001315g0010												Nitab4.5_0003330g0030
Nitab4.5_0001438g0070	Nitab4.5_0019126g0010			Nitab4.5_0000895g0180		Nitab4.5_0000143g0160	Nitab4.5_0005102g0130		Nitab4.5_0008124g0030			Nitab4.5_0004326g0010	Nitab4.5_0000346g0080		Nitab4.5_0000568g0030	Nitab4.5_0004370g0060					Nitab4.5_0007539g0020			Nitab4.5_0001993g0060	Nitab4.5_0008453g0010		Nitab4.5_0001302g0090	Nitab4.5_0003259g0070			Nitab4.5_0005692g0060					Nitab4.5_0008126g0020												Nitab4.5_0005059g0020
Nitab4.5_0004475g0010	Nitab4.5_0004846g0020			Nitab4.5_0000055g0030		Nitab4.5_0003626g0040	Nitab4.5_0005640g0010		Nitab4.5_0005120g0090			Nitab4.5_0000203g0220	Nitab4.5_0003227g0030		Nitab4.5_0001267g0020	Nitab4.5_0000113g0010					Nitab4.5_0007254g0040			Nitab4.5_0015425g0010	Nitab4.5_0003533g0030		Nitab4.5_0008429g0010	Nitab4.5_0000653g0030			Nitab4.5_0000601g0040					Nitab4.5_0000055g0250												Nitab4.5_0005729g0010
Nitab4.5_0000300g0280	Nitab4.5_0001167g0080			Nitab4.5_0000445g0130		Nitab4.5_0001004g0170	Nitab4.5_0006000g0050		Nitab4.5_0001368g0010			Nitab4.5_0000786g0170	Nitab4.5_0002762g0010		Nitab4.5_0010547g0040	Nitab4.5_0005885g0010					Nitab4.5_0006036g0020			Nitab4.5_0010275g0010	Nitab4.5_0006562g0070		Nitab4.5_0001999g0030	Nitab4.5_0000749g0130			Nitab4.5_0000461g0280					Nitab4.5_0000192g0140												Nitab4.5_0006400g0040
Nitab4.5_0003636g0010	Nitab4.5_0006081g0010			Nitab4.5_0005596g0080		Nitab4.5_0001812g0040	Nitab4.5_0006255g0020		Nitab4.5_0002708g0020			Nitab4.5_0006196g0020	Nitab4.5_0000241g0100		Nitab4.5_0005487g0010	Nitab4.5_0000062g0210					Nitab4.5_0000797g0120			Nitab4.5_0004475g0010	Nitab4.5_0007284g0020		Nitab4.5_0012393g0010	Nitab4.5_0002415g0050			Nitab4.5_0006508g0040					Nitab4.5_0000832g0040												Nitab4.5_0007687g0030
Nitab4.5_0000348g0190	Nitab4.5_0005362g0060			Nitab4.5_0000825g0090		Nitab4.5_0000856g0010	Nitab4.5_0011815g0020		Nitab4.5_0002771g0040			Nitab4.5_0003470g0060	Nitab4.5_0003827g0040		Nitab4.5_0009567g0010	Nitab4.5_0000052g0250					Nitab4.5_0003298g0060			Nitab4.5_0003636g0010	Nitab4.5_0000566g0010		Nitab4.5_0003501g0050	Nitab4.5_0004367g0160			Nitab4.5_0001185g0050					Nitab4.5_0001289g0020												Nitab4.5_0007816g0010
Nitab4.5_0005040g0030	Nitab4.5_0000030g0370			Nitab4.5_0001747g0070		Nitab4.5_0012494g0040			Nitab4.5_0004728g0070			Nitab4.5_0004926g0030	Nitab4.5_0005930g0040		Nitab4.5_0010461g0020	Nitab4.5_0001674g0010					Nitab4.5_0003519g0060			Nitab4.5_0001040g0170	Nitab4.5_0001172g0040		Nitab4.5_0003810g0030	Nitab4.5_0000926g0120			Nitab4.5_0000161g0290					Nitab4.5_0001815g0020												Nitab4.5_0008499g0040
Nitab4.5_0000241g0190	Nitab4.5_0000898g0120			Nitab4.5_0000008g0670		Nitab4.5_0004480g0050			Nitab4.5_0001557g0030			Nitab4.5_0002820g0090	Nitab4.5_0010797g0030		Nitab4.5_0000375g0170	Nitab4.5_0011862g0010					Nitab4.5_0001531g0020			Nitab4.5_0007099g0020	Nitab4.5_0001755g0150		Nitab4.5_0000015g0210	Nitab4.5_0006568g0010			Nitab4.5_0003151g0060					Nitab4.5_0004361g0030												Nitab4.5_0014741g0010
Nitab4.5_0003888g0010	Nitab4.5_0001175g0140			Nitab4.5_0001288g0100		Nitab4.5_0000021g0170			Nitab4.5_0000498g0040			Nitab4.5_0008168g0010	Nitab4.5_0000016g0050		Nitab4.5_0001059g0220	Nitab4.5_0012895g0010					Nitab4.5_0000610g0300			Nitab4.5_0000319g0100	Nitab4.5_0007840g0030		Nitab4.5_0009965g0010	Nitab4.5_0006480g0020			Nitab4.5_0006605g0040					Nitab4.5_0004772g0020												Nitab4.5_0014854g0010
Nitab4.5_0012818g0010	Nitab4.5_0005879g0020			Nitab4.5_0001288g0190		Nitab4.5_0000705g0050			Nitab4.5_0000200g0220			Nitab4.5_0000508g0180	Nitab4.5_0000036g0390		Nitab4.5_0001105g0210	Nitab4.5_0000252g0010					Nitab4.5_0000525g0290			Nitab4.5_0000319g0150	Nitab4.5_0000686g0040		Nitab4.5_0000321g0280	Nitab4.5_0000614g0100			Nitab4.5_0003280g0010					Nitab4.5_0012069g0010												Nitab4.5_0001190g0010
Nitab4.5_0000110g0540	Nitab4.5_0003819g0010			Nitab4.5_0003402g0040		Nitab4.5_0000408g0160			Nitab4.5_0000593g0080			Nitab4.5_0007069g0040	Nitab4.5_0000081g0230		Nitab4.5_0002279g0110	Nitab4.5_0001157g0080					Nitab4.5_0001810g0030			Nitab4.5_0005040g0030	Nitab4.5_0012696g0030		Nitab4.5_0000082g0150	Nitab4.5_0006696g0020			Nitab4.5_0000620g0120					Nitab4.5_0005605g0020												Nitab4.5_0000014g0090
Nitab4.5_0001466g0090	Nitab4.5_0000028g0460			Nitab4.5_0003647g0060		Nitab4.5_0000028g0320			Nitab4.5_0002113g0180			Nitab4.5_0025073g0010	Nitab4.5_0000354g0040		Nitab4.5_0005441g0070	Nitab4.5_0007479g0010					Nitab4.5_0007322g0010			Nitab4.5_0000128g0240	Nitab4.5_0009819g0010		Nitab4.5_0003587g0060	Nitab4.5_0000433g0070			Nitab4.5_0003512g0020					Nitab4.5_0001237g0050												Nitab4.5_0000040g0130
Nitab4.5_0003783g0030	Nitab4.5_0002658g0060			Nitab4.5_0005157g0010		Nitab4.5_0000322g0190			Nitab4.5_0011667g0010			Nitab4.5_0000028g0180	Nitab4.5_0000377g0210		Nitab4.5_0008936g0020	Nitab4.5_0010127g0010					Nitab4.5_0012663g0010			Nitab4.5_0000241g0190	Nitab4.5_0003449g0060		Nitab4.5_0000078g0090	Nitab4.5_0001000g0100			Nitab4.5_0000525g0260					Nitab4.5_0002518g0050												Nitab4.5_0005472g0030
Nitab4.5_0000369g0100	Nitab4.5_0007032g0020			Nitab4.5_0010970g0010		Nitab4.5_0000368g0130			Nitab4.5_0000440g0010			Nitab4.5_0004833g0020	Nitab4.5_0000768g0030		Nitab4.5_0001059g0200	Nitab4.5_0012606g0030					Nitab4.5_0000211g0050			Nitab4.5_0003888g0010	Nitab4.5_0000006g0280		Nitab4.5_0001254g0010	Nitab4.5_0001160g0120			Nitab4.5_0012787g0030					Nitab4.5_0001311g0190												Nitab4.5_0001933g0090
Nitab4.5_0000525g0160	Nitab4.5_0001337g0040			Nitab4.5_0014769g0020		Nitab4.5_0004873g0040			Nitab4.5_0008039g0010			Nitab4.5_0000028g0200	Nitab4.5_0001542g0060		Nitab4.5_0001059g0210	Nitab4.5_0001146g0180					Nitab4.5_0002527g0040			Nitab4.5_0012818g0010	Nitab4.5_0002853g0110		Nitab4.5_0002438g0030	Nitab4.5_0004362g0040			Nitab4.5_0001611g0110					Nitab4.5_0000143g0400												Nitab4.5_0017715g0010
Nitab4.5_0004798g0070	Nitab4.5_0000852g0030			Nitab4.5_0002656g0060		Nitab4.5_0007307g0020			Nitab4.5_0000103g0280			Nitab4.5_0004833g0040	Nitab4.5_0001975g0030		Nitab4.5_0008936g0030	Nitab4.5_0002842g0120					Nitab4.5_0001612g0020			Nitab4.5_0000110g0540	Nitab4.5_0000110g0100		Nitab4.5_0008982g0050	Nitab4.5_0004612g0040			Nitab4.5_0000789g0130					Nitab4.5_0002113g0080												Nitab4.5_0000143g0530
Nitab4.5_0007644g0010	Nitab4.5_0005862g0060			Nitab4.5_0001747g0090		Nitab4.5_0000759g0270			Nitab4.5_0000103g0310			Nitab4.5_0000151g0280	Nitab4.5_0003180g0060		Nitab4.5_0001925g0070	Nitab4.5_0002902g0090					Nitab4.5_0002492g0080			Nitab4.5_0003783g0030	Nitab4.5_0002282g0030		Nitab4.5_0001031g0060	Nitab4.5_0005195g0030			Nitab4.5_0002784g0020					Nitab4.5_0005452g0010												Nitab4.5_0000143g0520
Nitab4.5_0000051g0160	Nitab4.5_0010209g0020			Nitab4.5_0003315g0080		Nitab4.5_0000871g0060			Nitab4.5_0000687g0050			Nitab4.5_0003813g0030	Nitab4.5_0003360g0050		Nitab4.5_0006164g0050	Nitab4.5_0000649g0170					Nitab4.5_0003858g0020			Nitab4.5_0000500g0100	Nitab4.5_0006540g0040		Nitab4.5_0004955g0020	Nitab4.5_0004249g0020			Nitab4.5_0000513g0170					Nitab4.5_0007261g0080												Nitab4.5_0028943g0010
Nitab4.5_0006278g0010	Nitab4.5_0000027g0550			Nitab4.5_0008108g0020		Nitab4.5_0002458g0030			Nitab4.5_0001372g0100			Nitab4.5_0000280g0020	Nitab4.5_0003464g0030		Nitab4.5_0003841g0040	Nitab4.5_0011386g0010					Nitab4.5_0005928g0010			Nitab4.5_0007628g0040	Nitab4.5_0011041g0020		Nitab4.5_0007028g0030	Nitab4.5_0000170g0190			Nitab4.5_0000193g0090					Nitab4.5_0001652g0150												Nitab4.5_0001000g0160
Nitab4.5_0006278g0020	Nitab4.5_0000149g0170			Nitab4.5_0000525g0050		Nitab4.5_0003694g0060			Nitab4.5_0000412g0050			Nitab4.5_0005327g0010	Nitab4.5_0003730g0030		Nitab4.5_0012783g0010	Nitab4.5_0000760g0030					Nitab4.5_0000182g0050			Nitab4.5_0007644g0010	Nitab4.5_0005428g0070		Nitab4.5_0002992g0080	Nitab4.5_0001810g0030			Nitab4.5_0006721g0030					Nitab4.5_0001283g0040												Nitab4.5_0000381g0130
Nitab4.5_0000040g0280	Nitab4.5_0000287g0240			Nitab4.5_0000525g0060		Nitab4.5_0000077g0100			Nitab4.5_0001984g0010			Nitab4.5_0000203g0030	Nitab4.5_0006850g0020		Nitab4.5_0000009g0310	Nitab4.5_0000760g0040					Nitab4.5_0008001g0030			Nitab4.5_0003234g0010	Nitab4.5_0000408g0020		Nitab4.5_0000036g0240	Nitab4.5_0002948g0020			Nitab4.5_0002532g0040					Nitab4.5_0000143g0540												Nitab4.5_0000508g0130
Nitab4.5_0008527g0020	Nitab4.5_0000425g0220			Nitab4.5_0003796g0060		Nitab4.5_0002124g0010			Nitab4.5_0000111g0160			Nitab4.5_0004697g0100	Nitab4.5_0012767g0010		Nitab4.5_0001225g0250	Nitab4.5_0003151g0060					Nitab4.5_0000515g0030			Nitab4.5_0002137g0050	Nitab4.5_0000562g0100		Nitab4.5_0005726g0020	Nitab4.5_0005501g0020			Nitab4.5_0000252g0170					Nitab4.5_0000492g0180												Nitab4.5_0000508g0140
Nitab4.5_0000451g0050	Nitab4.5_0000755g0200			Nitab4.5_0010290g0010		Nitab4.5_0008897g0050			Nitab4.5_0000573g0170			Nitab4.5_0000377g0110	Nitab4.5_0001580g0110		Nitab4.5_0002005g0020	Nitab4.5_0002168g0010					Nitab4.5_0011952g0010			Nitab4.5_0006278g0020	Nitab4.5_0000677g0100		Nitab4.5_0003407g0030	Nitab4.5_0007322g0010			Nitab4.5_0000114g0140					Nitab4.5_0001339g0060												Nitab4.5_0009407g0010
Nitab4.5_0000867g0010	Nitab4.5_0000991g0040			Nitab4.5_0003379g0080		Nitab4.5_0006416g0010			Nitab4.5_0004208g0010			Nitab4.5_0005748g0010	Nitab4.5_0004846g0020		Nitab4.5_0001781g0170	Nitab4.5_0005171g0070					Nitab4.5_0007384g0010			Nitab4.5_0000040g0280	Nitab4.5_0008527g0010		Nitab4.5_0000713g0230	Nitab4.5_0008188g0020			Nitab4.5_0002212g0030					Nitab4.5_0009899g0010												Nitab4.5_0002214g0080
Nitab4.5_0005892g0020	Nitab4.5_0001002g0070			Nitab4.5_0000722g0020		Nitab4.5_0013596g0010			Nitab4.5_0010993g0020			Nitab4.5_0000672g0160	Nitab4.5_0001167g0080		Nitab4.5_0002216g0020	Nitab4.5_0000230g0130					Nitab4.5_0000863g0030			Nitab4.5_0001255g0010	Nitab4.5_0000761g0100		Nitab4.5_0007767g0040	Nitab4.5_0012663g0010			Nitab4.5_0004123g0020					Nitab4.5_0004119g0040												Nitab4.5_0000461g0190
Nitab4.5_0001295g0210	Nitab4.5_0001538g0100			Nitab4.5_0007140g0010		Nitab4.5_0000084g0480			Nitab4.5_0000655g0030			Nitab4.5_0021113g0010	Nitab4.5_0006081g0010		Nitab4.5_0006469g0010	Nitab4.5_0001311g0140					Nitab4.5_0021719g0010			Nitab4.5_0000451g0050	Nitab4.5_0008520g0020		Nitab4.5_0002100g0050	Nitab4.5_0012954g0010			Nitab4.5_0009160g0010					Nitab4.5_0000222g0230												Nitab4.5_0003876g0010
Nitab4.5_0000549g0050	Nitab4.5_0004756g0060			Nitab4.5_0000647g0190		Nitab4.5_0003715g0060			Nitab4.5_0002857g0010			Nitab4.5_0000363g0280	Nitab4.5_0003313g0030		Nitab4.5_0000731g0010	Nitab4.5_0006288g0010					Nitab4.5_0000424g0010			Nitab4.5_0000867g0010	Nitab4.5_0007348g0010		Nitab4.5_0004338g0090	Nitab4.5_0005076g0020			Nitab4.5_0013024g0010					Nitab4.5_0006558g0010												Nitab4.5_0004275g0010
Nitab4.5_0002082g0010	Nitab4.5_0005096g0020			Nitab4.5_0016574g0010		Nitab4.5_0000104g0070			Nitab4.5_0000367g0060			Nitab4.5_0007407g0030	Nitab4.5_0004776g0020		Nitab4.5_0008177g0020	Nitab4.5_0007485g0040					Nitab4.5_0007475g0010			Nitab4.5_0000084g0490	Nitab4.5_0000191g0030		Nitab4.5_0001118g0040	Nitab4.5_0000015g0330			Nitab4.5_0001143g0020					Nitab4.5_0000183g0140												Nitab4.5_0000113g0100
Nitab4.5_0001006g0040	Nitab4.5_0006272g0010			Nitab4.5_0000090g0240		Nitab4.5_0000116g0120			Nitab4.5_0005897g0040			Nitab4.5_0001317g0020	Nitab4.5_0000030g0370		Nitab4.5_0003465g0090	Nitab4.5_0000067g0140					Nitab4.5_0002282g0050			Nitab4.5_0003140g0010	Nitab4.5_0000784g0030		Nitab4.5_0000164g0080	Nitab4.5_0001524g0030			Nitab4.5_0001360g0220					Nitab4.5_0002276g0050												Nitab4.5_0000143g0170
Nitab4.5_0001006g0050	Nitab4.5_0006745g0020			Nitab4.5_0004990g0010		Nitab4.5_0000138g0140			Nitab4.5_0000006g0560			Nitab4.5_0005266g0040	Nitab4.5_0000898g0120		Nitab4.5_0002367g0120	Nitab4.5_0000380g0170					Nitab4.5_0002344g0160			Nitab4.5_0000271g0020	Nitab4.5_0000185g0250		Nitab4.5_0022963g0010	Nitab4.5_0005596g0080			Nitab4.5_0001657g0010					Nitab4.5_0006480g0020												Nitab4.5_0000143g0270
Nitab4.5_0008080g0020	Nitab4.5_0008277g0020			Nitab4.5_0003282g0020		Nitab4.5_0000149g0140			Nitab4.5_0008712g0030			Nitab4.5_0007623g0020	Nitab4.5_0000985g0060		Nitab4.5_0002398g0060	Nitab4.5_0005622g0010					Nitab4.5_0001170g0220			Nitab4.5_0008194g0090	Nitab4.5_0001505g0020		Nitab4.5_0000140g0140	Nitab4.5_0000057g0030			Nitab4.5_0001383g0180					Nitab4.5_0006696g0020												Nitab4.5_0000425g0230
Nitab4.5_0004445g0050	Nitab4.5_0011122g0010			Nitab4.5_0000292g0090		Nitab4.5_0000452g0110			Nitab4.5_0000008g0460			Nitab4.5_0008276g0020	Nitab4.5_0001175g0140		Nitab4.5_0006592g0010	Nitab4.5_0000846g0010					Nitab4.5_0005392g0070			Nitab4.5_0001006g0040	Nitab4.5_0005033g0030		Nitab4.5_0000855g0140	Nitab4.5_0001611g0010			Nitab4.5_0000573g0060					Nitab4.5_0012046g0010												Nitab4.5_0001296g0170
Nitab4.5_0017675g0010	Nitab4.5_0001781g0130			Nitab4.5_0002456g0090		Nitab4.5_0000584g0040			Nitab4.5_0009003g0030			Nitab4.5_0002486g0020	Nitab4.5_0005587g0040		Nitab4.5_0000762g0130	Nitab4.5_0001684g0040					Nitab4.5_0000115g0330			Nitab4.5_0001006g0050	Nitab4.5_0009463g0020		Nitab4.5_0000036g0420	Nitab4.5_0005157g0010			Nitab4.5_0010008g0010					Nitab4.5_0001668g0090												Nitab4.5_0001438g0010
Nitab4.5_0000307g0240	Nitab4.5_0009933g0010			Nitab4.5_0002920g0050		Nitab4.5_0000649g0060			Nitab4.5_0001519g0130			Nitab4.5_0003603g0010	Nitab4.5_0011712g0010		Nitab4.5_0008438g0040	Nitab4.5_0006546g0010					Nitab4.5_0011435g0010			Nitab4.5_0008080g0020	Nitab4.5_0009512g0040		Nitab4.5_0002713g0020	Nitab4.5_0001747g0090			Nitab4.5_0007324g0040					Nitab4.5_0003983g0030												Nitab4.5_0001530g0150
Nitab4.5_0000396g0230	Nitab4.5_0000142g0350			Nitab4.5_0010004g0010		Nitab4.5_0000803g0050			Nitab4.5_0002642g0070			Nitab4.5_0006294g0060	Nitab4.5_0002007g0030		Nitab4.5_0000572g0120	Nitab4.5_0001013g0060					Nitab4.5_0002396g0040			Nitab4.5_0017675g0010	Nitab4.5_0001295g0040		Nitab4.5_0000284g0040	Nitab4.5_0000722g0020			Nitab4.5_0000055g0250					Nitab4.5_0003983g0070												Nitab4.5_0003025g0010
Nitab4.5_0007665g0010	Nitab4.5_0001072g0020			Nitab4.5_0001658g0010		Nitab4.5_0000818g0100			Nitab4.5_0002824g0030			Nitab4.5_0000080g0160	Nitab4.5_0005879g0020		Nitab4.5_0000572g0110	Nitab4.5_0001013g0070					Nitab4.5_0005549g0010			Nitab4.5_0001223g0190	Nitab4.5_0003460g0040		Nitab4.5_0000604g0030	Nitab4.5_0007140g0010			Nitab4.5_0000482g0170					Nitab4.5_0004482g0050												Nitab4.5_0003513g0010
Nitab4.5_0001223g0190	Nitab4.5_0001870g0010			Nitab4.5_0000848g0080		Nitab4.5_0001151g0010			Nitab4.5_0006861g0010			Nitab4.5_0001625g0070	Nitab4.5_0000228g0090		Nitab4.5_0001950g0060	Nitab4.5_0003079g0070					Nitab4.5_0003298g0070			Nitab4.5_0000786g0170	Nitab4.5_0007429g0030		Nitab4.5_0001439g0060	Nitab4.5_0002118g0020			Nitab4.5_0000631g0110					Nitab4.5_0004482g0080												Nitab4.5_0008773g0010
Nitab4.5_0001315g0020	Nitab4.5_0000441g0050			Nitab4.5_0000388g0110		Nitab4.5_0001151g0020			Nitab4.5_0002081g0010			Nitab4.5_0012866g0010	Nitab4.5_0012658g0010		Nitab4.5_0004979g0130	Nitab4.5_0006398g0030					Nitab4.5_0005144g0010			Nitab4.5_0006196g0020	Nitab4.5_0000154g0310		Nitab4.5_0008709g0030	Nitab4.5_0000054g0090			Nitab4.5_0003449g0080					Nitab4.5_0007493g0030												Nitab4.5_0009611g0040
Nitab4.5_0000786g0170	Nitab4.5_0000920g0140			Nitab4.5_0002308g0090		Nitab4.5_0001186g0030			Nitab4.5_0000310g0220			Nitab4.5_0000650g0060	Nitab4.5_0000514g0160		Nitab4.5_0005050g0010	Nitab4.5_0007026g0010					Nitab4.5_0000223g0110			Nitab4.5_0003470g0060	Nitab4.5_0009563g0030		Nitab4.5_0000436g0210	Nitab4.5_0000054g0100			Nitab4.5_0004361g0030					Nitab4.5_0004362g0040
Nitab4.5_0003470g0060	Nitab4.5_0013736g0010			Nitab4.5_0002141g0020		Nitab4.5_0001496g0030			Nitab4.5_0000440g0170			Nitab4.5_0010509g0010	Nitab4.5_0002658g0060		Nitab4.5_0000570g0090	Nitab4.5_0007026g0020					Nitab4.5_0015544g0010			Nitab4.5_0004926g0030	Nitab4.5_0000031g0400		Nitab4.5_0001005g0050	Nitab4.5_0007475g0010			Nitab4.5_0012069g0010					Nitab4.5_0002904g0010
Nitab4.5_0004926g0030	Nitab4.5_0000900g0050			Nitab4.5_0000381g0110		Nitab4.5_0001922g0090			Nitab4.5_0004123g0030			Nitab4.5_0000485g0050	Nitab4.5_0001337g0010		Nitab4.5_0025830g0010	Nitab4.5_0007712g0010					Nitab4.5_0011805g0020			Nitab4.5_0002820g0090	Nitab4.5_0000795g0060		Nitab4.5_0001381g0120	Nitab4.5_0000654g0010			Nitab4.5_0012091g0020					Nitab4.5_0000440g0090
Nitab4.5_0002820g0090	Nitab4.5_0009577g0040			Nitab4.5_0008402g0020		Nitab4.5_0002059g0090			Nitab4.5_0017568g0010			Nitab4.5_0009102g0010	Nitab4.5_0001337g0040		Nitab4.5_0003020g0040	Nitab4.5_0001043g0010					Nitab4.5_0000229g0030			Nitab4.5_0004516g0020	Nitab4.5_0000884g0020		Nitab4.5_0002289g0070	Nitab4.5_0002920g0050			Nitab4.5_0000631g0090					Nitab4.5_0004437g0040
Nitab4.5_0000001g0070	Nitab4.5_0011407g0020			Nitab4.5_0000688g0170		Nitab4.5_0002059g0100			Nitab4.5_0001477g0070			Nitab4.5_0007431g0050	Nitab4.5_0001794g0080		Nitab4.5_0000034g0250	Nitab4.5_0000029g0110					Nitab4.5_0003481g0110			Nitab4.5_0002825g0010	Nitab4.5_0003893g0030		Nitab4.5_0011883g0010	Nitab4.5_0001925g0250			Nitab4.5_0000031g0370					Nitab4.5_0003758g0010
Nitab4.5_0002825g0010	Nitab4.5_0000016g0140			Nitab4.5_0000013g0380		Nitab4.5_0002093g0010			Nitab4.5_0003771g0010			Nitab4.5_0008425g0040	Nitab4.5_0009466g0030		Nitab4.5_0005382g0020	Nitab4.5_0000192g0130					Nitab4.5_0000246g0260			Nitab4.5_0008168g0010	Nitab4.5_0000346g0080		Nitab4.5_0017035g0010	Nitab4.5_0000688g0170			Nitab4.5_0000884g0010					Nitab4.5_0000013g0470
Nitab4.5_0008168g0010	Nitab4.5_0006846g0010			Nitab4.5_0000013g0390		Nitab4.5_0002312g0100			Nitab4.5_0000096g0270			Nitab4.5_0000068g0460	Nitab4.5_0011008g0010		Nitab4.5_0005149g0010	Nitab4.5_0000192g0140					Nitab4.5_0001145g0020			Nitab4.5_0000458g0090	Nitab4.5_0001653g0030		Nitab4.5_0000153g0190	Nitab4.5_0006074g0010			Nitab4.5_0014046g0010					Nitab4.5_0007055g0020
Nitab4.5_0003160g0100	Nitab4.5_0011695g0010			Nitab4.5_0003284g0010		Nitab4.5_0002312g0110			Nitab4.5_0006051g0020			Nitab4.5_0009769g0010	Nitab4.5_0000852g0030		Nitab4.5_0000411g0010	Nitab4.5_0001289g0020					Nitab4.5_0001004g0170			Nitab4.5_0007069g0040	Nitab4.5_0001677g0100		Nitab4.5_0001194g0050	Nitab4.5_0002532g0050			Nitab4.5_0001889g0160					Nitab4.5_0007322g0010
Nitab4.5_0007069g0040	Nitab4.5_0000376g0140			Nitab4.5_0003284g0040		Nitab4.5_0002450g0090			Nitab4.5_0007254g0050			Nitab4.5_0000381g0030	Nitab4.5_0005862g0060		Nitab4.5_0000476g0010	Nitab4.5_0001289g0040					Nitab4.5_0001812g0040			Nitab4.5_0008484g0020	Nitab4.5_0002762g0010		Nitab4.5_0000782g0030	Nitab4.5_0001357g0040			Nitab4.5_0001691g0050					Nitab4.5_0012663g0010
Nitab4.5_0008484g0020	Nitab4.5_0002162g0230			Nitab4.5_0011232g0010		Nitab4.5_0003074g0030			Nitab4.5_0005549g0020			Nitab4.5_0000068g0190	Nitab4.5_0013252g0010		Nitab4.5_0001375g0040	Nitab4.5_0003170g0010					Nitab4.5_0005423g0030			Nitab4.5_0025073g0010	Nitab4.5_0011639g0010		Nitab4.5_0000782g0070	Nitab4.5_0024998g0010			Nitab4.5_0002885g0060					Nitab4.5_0000977g0100
Nitab4.5_0025073g0010	Nitab4.5_0000692g0050			Nitab4.5_0001409g0100		Nitab4.5_0005491g0040			Nitab4.5_0000786g0210			Nitab4.5_0000207g0410	Nitab4.5_0010209g0020		Nitab4.5_0000305g0220	Nitab4.5_0004708g0050					Nitab4.5_0001336g0090			Nitab4.5_0000028g0180	Nitab4.5_0000241g0100		Nitab4.5_0003040g0010	Nitab4.5_0001816g0010			Nitab4.5_0005250g0040					Nitab4.5_0000143g0070
Nitab4.5_0000028g0180	Nitab4.5_0012103g0010			Nitab4.5_0004743g0100		Nitab4.5_0007767g0020			Nitab4.5_0000786g0230			Nitab4.5_0000207g0450	Nitab4.5_0000027g0550		Nitab4.5_0003185g0070	Nitab4.5_0006269g0030					Nitab4.5_0011467g0030			Nitab4.5_0000028g0200	Nitab4.5_0003827g0040		Nitab4.5_0001111g0050	Nitab4.5_0002886g0100			Nitab4.5_0010115g0020					Nitab4.5_0000231g0490
Nitab4.5_0000028g0200	Nitab4.5_0002679g0010			Nitab4.5_0001647g0120		Nitab4.5_0008551g0010			Nitab4.5_0000786g0240			Nitab4.5_0004384g0050	Nitab4.5_0000149g0170		Nitab4.5_0000057g0330	Nitab4.5_0008954g0050					Nitab4.5_0000408g0160			Nitab4.5_0004833g0020	Nitab4.5_0005930g0040		Nitab4.5_0002257g0090	Nitab4.5_0010979g0030			Nitab4.5_0014845g0010					Nitab4.5_0000375g0060
Nitab4.5_0004833g0020	Nitab4.5_0002916g0030			Nitab4.5_0000202g0160		Nitab4.5_0009232g0010			Nitab4.5_0005755g0010			Nitab4.5_0004384g0060	Nitab4.5_0000425g0220		Nitab4.5_0001194g0010	Nitab4.5_0009648g0040					Nitab4.5_0006983g0020			Nitab4.5_0004833g0040	Nitab4.5_0010797g0030		Nitab4.5_0009569g0010	Nitab4.5_0011049g0010			Nitab4.5_0000064g0040					Nitab4.5_0000452g0160
Nitab4.5_0004833g0040	Nitab4.5_0003768g0020			Nitab4.5_0000421g0150		Nitab4.5_0009524g0010			Nitab4.5_0005755g0020			Nitab4.5_0000438g0070	Nitab4.5_0000755g0200		Nitab4.5_0003189g0020	Nitab4.5_0010308g0030					Nitab4.5_0006919g0020			Nitab4.5_0000151g0280	Nitab4.5_0000016g0050		Nitab4.5_0003738g0070	Nitab4.5_0010979g0020			Nitab4.5_0000222g0230					Nitab4.5_0001526g0040
Nitab4.5_0000151g0280	Nitab4.5_0018681g0010			Nitab4.5_0000705g0050		Nitab4.5_0010125g0040			Nitab4.5_0001423g0140			Nitab4.5_0006119g0050	Nitab4.5_0000991g0040		Nitab4.5_0000006g0090	Nitab4.5_0011360g0020					Nitab4.5_0000396g0170			Nitab4.5_0003813g0030	Nitab4.5_0000036g0390		Nitab4.5_0000838g0070	Nitab4.5_0000073g0400			Nitab4.5_0001764g0100					Nitab4.5_0001822g0020
Nitab4.5_0003813g0030	Nitab4.5_0004469g0030			Nitab4.5_0007133g0030		Nitab4.5_0010237g0050			Nitab4.5_0002848g0030			Nitab4.5_0000608g0140	Nitab4.5_0001002g0070		Nitab4.5_0001884g0020	Nitab4.5_0002886g0120					Nitab4.5_0000642g0130			Nitab4.5_0006603g0020	Nitab4.5_0000354g0040		Nitab4.5_0000681g0150	Nitab4.5_0004168g0120			Nitab4.5_0009800g0010					Nitab4.5_0002548g0020
Nitab4.5_0006603g0020	Nitab4.5_0000082g0370			Nitab4.5_0000971g0130		Nitab4.5_0010389g0020			Nitab4.5_0000142g0340			Nitab4.5_0010957g0010	Nitab4.5_0001538g0100		Nitab4.5_0000095g0170	Nitab4.5_0001889g0160					Nitab4.5_0000368g0130			Nitab4.5_0000280g0020	Nitab4.5_0000377g0210		Nitab4.5_0001928g0020	Nitab4.5_0000658g0060			Nitab4.5_0000183g0140					Nitab4.5_0004452g0040
Nitab4.5_0000280g0020	Nitab4.5_0000917g0020			Nitab4.5_0013739g0010		Nitab4.5_0010904g0010			Nitab4.5_0002974g0040			Nitab4.5_0000303g0160	Nitab4.5_0004756g0060		Nitab4.5_0007383g0010	Nitab4.5_0000102g0140					Nitab4.5_0002458g0030			Nitab4.5_0005440g0060	Nitab4.5_0000768g0030		Nitab4.5_0003908g0010	Nitab4.5_0010178g0040			Nitab4.5_0002276g0050					Nitab4.5_0005204g0010
Nitab4.5_0005327g0010	Nitab4.5_0001902g0020			Nitab4.5_0001489g0010		Nitab4.5_0012304g0020			Nitab4.5_0001041g0060			Nitab4.5_0001907g0040	Nitab4.5_0005096g0020		Nitab4.5_0005022g0010	Nitab4.5_0002345g0080					Nitab4.5_0004685g0050			Nitab4.5_0005327g0010	Nitab4.5_0000885g0150		Nitab4.5_0001721g0010	Nitab4.5_0002998g0070			Nitab4.5_0006480g0020					Nitab4.5_0012487g0030
Nitab4.5_0007442g0010	Nitab4.5_0003368g0020			Nitab4.5_0000759g0270		Nitab4.5_0012448g0010			Nitab4.5_0001483g0030			Nitab4.5_0002649g0020	Nitab4.5_0006272g0010		Nitab4.5_0001783g0030	Nitab4.5_0006475g0040					Nitab4.5_0000026g0340			Nitab4.5_0003114g0010	Nitab4.5_0001542g0060		Nitab4.5_0003494g0020	Nitab4.5_0004970g0030			Nitab4.5_0003983g0070					Nitab4.5_0025775g0010
Nitab4.5_0001133g0040	Nitab4.5_0000254g0020			Nitab4.5_0000922g0020		Nitab4.5_0016805g0010			Nitab4.5_0003171g0010			Nitab4.5_0000307g0060	Nitab4.5_0006745g0020		Nitab4.5_0007594g0020	Nitab4.5_0000134g0030					Nitab4.5_0003694g0060			Nitab4.5_0007442g0010	Nitab4.5_0003180g0060		Nitab4.5_0000164g0200	Nitab4.5_0013739g0010			Nitab4.5_0004437g0040					Nitab4.5_0001428g0090
Nitab4.5_0001794g0130	Nitab4.5_0000728g0020			Nitab4.5_0000025g0300		Nitab4.5_0003313g0050			Nitab4.5_0000901g0110			Nitab4.5_0000036g0040	Nitab4.5_0006996g0040		Nitab4.5_0006795g0030	Nitab4.5_0001791g0030					Nitab4.5_0001208g0140			Nitab4.5_0000203g0030	Nitab4.5_0003360g0050		Nitab4.5_0001772g0020	Nitab4.5_0000028g0320			Nitab4.5_0000888g0070					Nitab4.5_0001438g0020
Nitab4.5_0008809g0030	Nitab4.5_0004623g0010			Nitab4.5_0000056g0150		Nitab4.5_0001540g0050			Nitab4.5_0000008g0500			Nitab4.5_0000284g0080	Nitab4.5_0011122g0010		Nitab4.5_0001662g0020	Nitab4.5_0000914g0300					Nitab4.5_0011832g0010			Nitab4.5_0005000g0010	Nitab4.5_0003374g0070		Nitab4.5_0000213g0030	Nitab4.5_0000396g0170			Nitab4.5_0001096g0020					Nitab4.5_0007792g0020
Nitab4.5_0000203g0030	Nitab4.5_0012979g0010			Nitab4.5_0012224g0020		Nitab4.5_0005400g0010			Nitab4.5_0007539g0020			Nitab4.5_0000651g0290	Nitab4.5_0001781g0130		Nitab4.5_0002209g0240	Nitab4.5_0000653g0030					Nitab4.5_0002124g0010			Nitab4.5_0004697g0100	Nitab4.5_0003464g0030		Nitab4.5_0002932g0010	Nitab4.5_0008278g0020			Nitab4.5_0001810g0030					Nitab4.5_0002986g0060
Nitab4.5_0000377g0110	Nitab4.5_0002498g0070			Nitab4.5_0000023g0690		Nitab4.5_0018164g0010			Nitab4.5_0007254g0040			Nitab4.5_0000224g0050	Nitab4.5_0009933g0010		Nitab4.5_0000869g0040	Nitab4.5_0004367g0160					Nitab4.5_0003703g0030			Nitab4.5_0000377g0110	Nitab4.5_0006850g0020		Nitab4.5_0004053g0010	Nitab4.5_0001489g0010			Nitab4.5_0004026g0020					Nitab4.5_0002679g0020
Nitab4.5_0005748g0010	Nitab4.5_0002498g0080			Nitab4.5_0000063g0130		Nitab4.5_0012553g0010			Nitab4.5_0000797g0120			Nitab4.5_0000224g0060	Nitab4.5_0000142g0350		Nitab4.5_0001662g0030	Nitab4.5_0000926g0120					Nitab4.5_0002369g0010			Nitab4.5_0005748g0010	Nitab4.5_0012767g0010		Nitab4.5_0006963g0050	Nitab4.5_0000759g0270			Nitab4.5_0008188g0020					Nitab4.5_0005188g0020
Nitab4.5_0000723g0200	Nitab4.5_0005031g0050			Nitab4.5_0000116g0120		Nitab4.5_0000184g0160			Nitab4.5_0002972g0030			Nitab4.5_0000629g0040	Nitab4.5_0001072g0020		Nitab4.5_0002495g0050	Nitab4.5_0002536g0030					Nitab4.5_0006960g0030			Nitab4.5_0000363g0280	Nitab4.5_0000287g0160		Nitab4.5_0020598g0010	Nitab4.5_0000922g0020			Nitab4.5_0012663g0010					Nitab4.5_0016574g0010
Nitab4.5_0003313g0060	Nitab4.5_0000368g0160			Nitab4.5_0000221g0090		Nitab4.5_0009050g0050			Nitab4.5_0001531g0020			Nitab4.5_0003745g0060	Nitab4.5_0003682g0040		Nitab4.5_0011714g0010	Nitab4.5_0006558g0010					Nitab4.5_0002241g0040			Nitab4.5_0001725g0110	Nitab4.5_0001580g0110		Nitab4.5_0003151g0100	Nitab4.5_0008482g0040			Nitab4.5_0012954g0010					Nitab4.5_0000143g0190
Nitab4.5_0000363g0280	Nitab4.5_0008173g0030			Nitab4.5_0000245g0010		Nitab4.5_0000769g0030			Nitab4.5_0000525g0290			Nitab4.5_0001456g0110	Nitab4.5_0000920g0140		Nitab4.5_0000156g0210	Nitab4.5_0000064g0080					Nitab4.5_0003715g0060			Nitab4.5_0007407g0030	Nitab4.5_0004846g0020		Nitab4.5_0000239g0100	Nitab4.5_0002878g0040			Nitab4.5_0002522g0070					Nitab4.5_0000040g0350
Nitab4.5_0007407g0030	Nitab4.5_0000088g0040			Nitab4.5_0000391g0160		Nitab4.5_0000522g0240			Nitab4.5_0001810g0030			Nitab4.5_0001965g0080	Nitab4.5_0013736g0010		Nitab4.5_0000180g0080	Nitab4.5_0001366g0090					Nitab4.5_0000027g0570			Nitab4.5_0021113g0010	Nitab4.5_0001139g0030		Nitab4.5_0005319g0030	Nitab4.5_0012224g0020			Nitab4.5_0008037g0020					Nitab4.5_0003950g0050
Nitab4.5_0006965g0010	Nitab4.5_0001295g0030			Nitab4.5_0000630g0170		Nitab4.5_0002568g0030			Nitab4.5_0007322g0010			Nitab4.5_0003968g0020	Nitab4.5_0000461g0010		Nitab4.5_0001899g0070	Nitab4.5_0006568g0010					Nitab4.5_0000027g0580			Nitab4.5_0006965g0010	Nitab4.5_0003313g0030		Nitab4.5_0008037g0030	Nitab4.5_0000116g0120			Nitab4.5_0000631g0130					Nitab4.5_0007345g0040
Nitab4.5_0007928g0020	Nitab4.5_0009652g0010			Nitab4.5_0000631g0030		Nitab4.5_0012161g0030			Nitab4.5_0012663g0010			Nitab4.5_0001762g0040	Nitab4.5_0000463g0140		Nitab4.5_0004788g0020	Nitab4.5_0000413g0220					Nitab4.5_0000057g0320			Nitab4.5_0009616g0010	Nitab4.5_0004776g0020		Nitab4.5_0002220g0060	Nitab4.5_0000321g0120			Nitab4.5_0003509g0050					Nitab4.5_0004260g0010
Nitab4.5_0016166g0010	Nitab4.5_0000681g0080			Nitab4.5_0000698g0020		Nitab4.5_0000647g0320			Nitab4.5_0006999g0030			Nitab4.5_0009467g0010	Nitab4.5_0000944g0030		Nitab4.5_0000755g0140	Nitab4.5_0000620g0240					Nitab4.5_0000104g0070			Nitab4.5_0001317g0020	Nitab4.5_0000898g0120		Nitab4.5_0013643g0010	Nitab4.5_0000509g0060			Nitab4.5_0000057g0030					Nitab4.5_0006625g0040
Nitab4.5_0001317g0020	Nitab4.5_0007975g0030			Nitab4.5_0000803g0050		Nitab4.5_0004554g0010			Nitab4.5_0000515g0030			Nitab4.5_0011970g0010	Nitab4.5_0004543g0030		Nitab4.5_0009324g0030	Nitab4.5_0000614g0100					Nitab4.5_0000404g0060			Nitab4.5_0005266g0040	Nitab4.5_0000985g0060		Nitab4.5_0006317g0040	Nitab4.5_0000631g0030			Nitab4.5_0000082g0090					Nitab4.5_0022146g0010
Nitab4.5_0005266g0040	Nitab4.5_0001096g0030			Nitab4.5_0000804g0080		Nitab4.5_0000446g0010			Nitab4.5_0011952g0010			Nitab4.5_0000863g0010	Nitab4.5_0000900g0050		Nitab4.5_0000869g0020	Nitab4.5_0001815g0040					Nitab4.5_0000650g0240			Nitab4.5_0007623g0020	Nitab4.5_0001175g0140		Nitab4.5_0003942g0080	Nitab4.5_0000698g0020			Nitab4.5_0000813g0010					Nitab4.5_0002214g0050
Nitab4.5_0007623g0020	Nitab4.5_0002145g0030			Nitab4.5_0000914g0280		Nitab4.5_0001675g0050			Nitab4.5_0012569g0010			Nitab4.5_0000321g0270	Nitab4.5_0009577g0040		Nitab4.5_0001244g0140	Nitab4.5_0001107g0030					Nitab4.5_0000780g0080			Nitab4.5_0008276g0020	Nitab4.5_0005587g0040		Nitab4.5_0002517g0040	Nitab4.5_0000880g0040			Nitab4.5_0001657g0030					Nitab4.5_0000061g0270
Nitab4.5_0008276g0020	Nitab4.5_0004227g0010			Nitab4.5_0000976g0150		Nitab4.5_0001675g0070			Nitab4.5_0003292g0020			Nitab4.5_0006625g0030	Nitab4.5_0011407g0020		Nitab4.5_0001323g0170	Nitab4.5_0000374g0140					Nitab4.5_0000784g0040			Nitab4.5_0002486g0020	Nitab4.5_0011712g0010		Nitab4.5_0024848g0010	Nitab4.5_0000906g0110			Nitab4.5_0002911g0030					Nitab4.5_0002677g0040
Nitab4.5_0002486g0020	Nitab4.5_0000886g0020			Nitab4.5_0001122g0090		Nitab4.5_0013465g0010			Nitab4.5_0021719g0010			Nitab4.5_0012644g0010	Nitab4.5_0010146g0020		Nitab4.5_0000073g0500	Nitab4.5_0006696g0020					Nitab4.5_0001170g0030			Nitab4.5_0003603g0010	Nitab4.5_0000263g0100		Nitab4.5_0000022g0300	Nitab4.5_0001314g0020			Nitab4.5_0007760g0010					Nitab4.5_0011131g0010
Nitab4.5_0000080g0160	Nitab4.5_0006384g0020			Nitab4.5_0001666g0010		Nitab4.5_0000244g0350			Nitab4.5_0000090g0240			Nitab4.5_0000036g0500	Nitab4.5_0011695g0010		Nitab4.5_0000364g0030	Nitab4.5_0012046g0010					Nitab4.5_0001192g0020			Nitab4.5_0001296g0090	Nitab4.5_0000228g0090		Nitab4.5_0001830g0040	Nitab4.5_0001323g0010			Nitab4.5_0025775g0010					Nitab4.5_0000292g0090
Nitab4.5_0000084g0230	Nitab4.5_0007710g0010			Nitab4.5_0001764g0140		Nitab4.5_0009499g0020			Nitab4.5_0000424g0010			Nitab4.5_0003855g0020	Nitab4.5_0004515g0040		Nitab4.5_0000636g0070	Nitab4.5_0000278g0100					Nitab4.5_0001521g0050			Nitab4.5_0000080g0160	Nitab4.5_0002949g0040		Nitab4.5_0004777g0030	Nitab4.5_0001922g0090			Nitab4.5_0001692g0010					Nitab4.5_0005392g0070
Nitab4.5_0000147g0200	Nitab4.5_0012282g0030			Nitab4.5_0001922g0090		Nitab4.5_0007185g0030			Nitab4.5_0001357g0110			Nitab4.5_0009593g0010	Nitab4.5_0002162g0230		Nitab4.5_0000636g0120	Nitab4.5_0001493g0020					Nitab4.5_0001671g0150			Nitab4.5_0000084g0230	Nitab4.5_0004036g0010		Nitab4.5_0000192g0200	Nitab4.5_0002226g0010			Nitab4.5_0000182g0050					Nitab4.5_0005646g0010
Nitab4.5_0001625g0070	Nitab4.5_0000126g0060			Nitab4.5_0002379g0010		Nitab4.5_0000490g0020			Nitab4.5_0006478g0010			Nitab4.5_0002664g0030	Nitab4.5_0000692g0050		Nitab4.5_0002570g0020	Nitab4.5_0002478g0050					Nitab4.5_0001858g0020			Nitab4.5_0000147g0200	Nitab4.5_0012658g0010		Nitab4.5_0000446g0060	Nitab4.5_0003234g0120			Nitab4.5_0014344g0010					Nitab4.5_0009329g0010
Nitab4.5_0003051g0010	Nitab4.5_0002348g0030			Nitab4.5_0002405g0050		Nitab4.5_0000888g0020			Nitab4.5_0006683g0070			Nitab4.5_0000430g0020	Nitab4.5_0012103g0010		Nitab4.5_0003307g0010	Nitab4.5_0007833g0010					Nitab4.5_0002059g0100			Nitab4.5_0001625g0070	Nitab4.5_0009374g0010		Nitab4.5_0001898g0080	Nitab4.5_0003330g0030			Nitab4.5_0007475g0010					Nitab4.5_0003906g0030
Nitab4.5_0012866g0010	Nitab4.5_0001478g0040			Nitab4.5_0003178g0050		Nitab4.5_0002882g0050			Nitab4.5_0007475g0010			Nitab4.5_0000658g0090	Nitab4.5_0000511g0060		Nitab4.5_0002214g0100	Nitab4.5_0001160g0120					Nitab4.5_0002093g0010			Nitab4.5_0012866g0010	Nitab4.5_0000028g0460		Nitab4.5_0000223g0070	Nitab4.5_0004524g0040			Nitab4.5_0011257g0010					Nitab4.5_0000217g0040
Nitab4.5_0000650g0060	Nitab4.5_0002315g0110			Nitab4.5_0003234g0120		Nitab4.5_0000257g0090			Nitab4.5_0006540g0010			Nitab4.5_0001730g0160	Nitab4.5_0004594g0120		Nitab4.5_0007542g0020	Nitab4.5_0004362g0040					Nitab4.5_0002312g0110			Nitab4.5_0000650g0060	Nitab4.5_0005494g0010		Nitab4.5_0000625g0050	Nitab4.5_0004977g0030			Nitab4.5_0001119g0090					Nitab4.5_0005664g0030
Nitab4.5_0001192g0030	Nitab4.5_0009493g0010			Nitab4.5_0003876g0030		Nitab4.5_0010523g0020			Nitab4.5_0000105g0080			Nitab4.5_0009034g0010	Nitab4.5_0002916g0030		Nitab4.5_0009048g0020	Nitab4.5_0005963g0070					Nitab4.5_0002806g0050			Nitab4.5_0010509g0010	Nitab4.5_0000152g0200		Nitab4.5_0003321g0030	Nitab4.5_0005418g0010			Nitab4.5_0000650g0100					Nitab4.5_0004222g0020
Nitab4.5_0010509g0010	Nitab4.5_0001028g0190			Nitab4.5_0004471g0060		Nitab4.5_0000006g0450			Nitab4.5_0000115g0330			Nitab4.5_0005756g0040	Nitab4.5_0018681g0010		Nitab4.5_0008535g0020	Nitab4.5_0002793g0020					Nitab4.5_0002859g0010			Nitab4.5_0000485g0050	Nitab4.5_0000250g0250		Nitab4.5_0001599g0170	Nitab4.5_0006201g0010			Nitab4.5_0005646g0010					Nitab4.5_0002450g0050
Nitab4.5_0000485g0050	Nitab4.5_0001221g0070			Nitab4.5_0005074g0010		Nitab4.5_0000012g0010			Nitab4.5_0001252g0030			Nitab4.5_0000264g0050	Nitab4.5_0000082g0370		Nitab4.5_0000694g0160	Nitab4.5_0004612g0040					Nitab4.5_0004776g0090			Nitab4.5_0009102g0010	Nitab4.5_0001133g0020		Nitab4.5_0000121g0260	Nitab4.5_0007454g0010			Nitab4.5_0000119g0380					Nitab4.5_0000036g0490
Nitab4.5_0009102g0010	Nitab4.5_0000023g0490			Nitab4.5_0005283g0070		Nitab4.5_0000044g0450			Nitab4.5_0009237g0010			Nitab4.5_0001200g0140	Nitab4.5_0000917g0020		Nitab4.5_0002112g0040	Nitab4.5_0001530g0020					Nitab4.5_0007767g0020			Nitab4.5_0000506g0160	Nitab4.5_0001337g0010		Nitab4.5_0000174g0270	Nitab4.5_0009392g0010			Nitab4.5_0002456g0090					Nitab4.5_0008240g0010
Nitab4.5_0007431g0050	Nitab4.5_0000023g0610			Nitab4.5_0006201g0010		Nitab4.5_0000062g0550			Nitab4.5_0003298g0070			Nitab4.5_0014302g0010	Nitab4.5_0001902g0020		Nitab4.5_0002773g0080	Nitab4.5_0008694g0010					Nitab4.5_0008298g0010			Nitab4.5_0008425g0040	Nitab4.5_0001337g0040		Nitab4.5_0000556g0040	Nitab4.5_0010510g0010			Nitab4.5_0002920g0050					Nitab4.5_0000143g0480
Nitab4.5_0000506g0160	Nitab4.5_0000070g0020			Nitab4.5_0008798g0020		Nitab4.5_0000105g0350			Nitab4.5_0005144g0010			Nitab4.5_0000062g0390	Nitab4.5_0003368g0020		Nitab4.5_0000356g0010	Nitab4.5_0005076g0020					Nitab4.5_0014741g0010			Nitab4.5_0000068g0460	Nitab4.5_0009466g0030		Nitab4.5_0000649g0090	Nitab4.5_0013754g0020			Nitab4.5_0005664g0030					Nitab4.5_0000143g0160
Nitab4.5_0008425g0040	Nitab4.5_0000227g0100			Nitab4.5_0010125g0040		Nitab4.5_0000109g0570			Nitab4.5_0015544g0010			Nitab4.5_0005702g0030	Nitab4.5_0001618g0240		Nitab4.5_0007436g0010	Nitab4.5_0000952g0060					Nitab4.5_0000605g0110			Nitab4.5_0000721g0200	Nitab4.5_0011008g0010		Nitab4.5_0001256g0080	Nitab4.5_0015562g0010			Nitab4.5_0003795g0030					Nitab4.5_0000002g0200
Nitab4.5_0000068g0460	Nitab4.5_0000280g0040			Nitab4.5_0011467g0040		Nitab4.5_0000363g0160			Nitab4.5_0000519g0190			Nitab4.5_0000201g0190	Nitab4.5_0004226g0010		Nitab4.5_0001726g0110	Nitab4.5_0005596g0080					Nitab4.5_0000170g0400			Nitab4.5_0000220g0120	Nitab4.5_0000203g0040		Nitab4.5_0002906g0080	Nitab4.5_0006224g0040			Nitab4.5_0002001g0010					Nitab4.5_0000602g0080
Nitab4.5_0005301g0010	Nitab4.5_0000280g0050			Nitab4.5_0012929g0010		Nitab4.5_0000401g0160			Nitab4.5_0003481g0110			Nitab4.5_0010112g0030	Nitab4.5_0000566g0190		Nitab4.5_0006266g0010	Nitab4.5_0000148g0080					Nitab4.5_0000014g0130			Nitab4.5_0000319g0240	Nitab4.5_0000852g0030		Nitab4.5_0005060g0020	Nitab4.5_0003080g0110			Nitab4.5_0004222g0020					Nitab4.5_0003747g0020
Nitab4.5_0009769g0010	Nitab4.5_0000280g0120			Nitab4.5_0026617g0010		Nitab4.5_0000415g0070			Nitab4.5_0005808g0010			Nitab4.5_0021050g0010	Nitab4.5_0002484g0060		Nitab4.5_0001093g0060	Nitab4.5_0001611g0010					Nitab4.5_0000008g0740			Nitab4.5_0000381g0030	Nitab4.5_0005862g0060		Nitab4.5_0005769g0040	Nitab4.5_0000040g0130			Nitab4.5_0000173g0290					Nitab4.5_0001241g0070
Nitab4.5_0000381g0030	Nitab4.5_0000366g0120			Nitab4.5_0028407g0010		Nitab4.5_0000425g0230			Nitab4.5_0000246g0260			Nitab4.5_0001519g0040	Nitab4.5_0000728g0020		Nitab4.5_0000519g0150	Nitab4.5_0005157g0010					Nitab4.5_0007375g0020			Nitab4.5_0000505g0010	Nitab4.5_0013252g0010		Nitab4.5_0001442g0010	Nitab4.5_0001077g0060			Nitab4.5_0000486g0020					Nitab4.5_0002598g0090
Nitab4.5_0000505g0010	Nitab4.5_0000381g0040			Nitab4.5_0000563g0210		Nitab4.5_0000518g0060			Nitab4.5_0000246g0290			Nitab4.5_0002642g0120	Nitab4.5_0004623g0010		Nitab4.5_0002172g0020	Nitab4.5_0000465g0100					Nitab4.5_0025760g0010			Nitab4.5_0001022g0080	Nitab4.5_0000027g0550		Nitab4.5_0004993g0020	Nitab4.5_0004300g0240			Nitab4.5_0000242g0080					Nitab4.5_0000287g0110
Nitab4.5_0000068g0190	Nitab4.5_0000488g0160			Nitab4.5_0001048g0050		Nitab4.5_0000558g0030			Nitab4.5_0001145g0020			Nitab4.5_0002824g0120	Nitab4.5_0000368g0160		Nitab4.5_0001229g0010	Nitab4.5_0000008g0910					Nitab4.5_0000286g0080			Nitab4.5_0000068g0190	Nitab4.5_0000149g0170		Nitab4.5_0004694g0040	Nitab4.5_0011330g0010			Nitab4.5_0004625g0010					Nitab4.5_0000707g0010
Nitab4.5_0000207g0410	Nitab4.5_0000777g0120			Nitab4.5_0003429g0040		Nitab4.5_0000662g0060			Nitab4.5_0000143g0160			Nitab4.5_0007302g0010	Nitab4.5_0008173g0030		Nitab4.5_0000687g0070	Nitab4.5_0003652g0020					Nitab4.5_0007691g0010			Nitab4.5_0000207g0410	Nitab4.5_0000425g0220		Nitab4.5_0003410g0020	Nitab4.5_0001726g0050			Nitab4.5_0004944g0050					Nitab4.5_0001200g0040
Nitab4.5_0000207g0450	Nitab4.5_0001196g0100			Nitab4.5_0000014g0090		Nitab4.5_0000718g0110			Nitab4.5_0001004g0170			Nitab4.5_0000026g0440	Nitab4.5_0010336g0040		Nitab4.5_0005960g0010	Nitab4.5_0000525g0060					Nitab4.5_0002568g0030			Nitab4.5_0000207g0450	Nitab4.5_0000991g0040		Nitab4.5_0000496g0130	Nitab4.5_0001134g0070			Nitab4.5_0001485g0110					Nitab4.5_0000170g0050
Nitab4.5_0004384g0050	Nitab4.5_0001196g0130			Nitab4.5_0000040g0130		Nitab4.5_0000944g0100			Nitab4.5_0001812g0040			Nitab4.5_0006493g0020	Nitab4.5_0010776g0010		Nitab4.5_0000174g0090	Nitab4.5_0003518g0040					Nitab4.5_0000039g0060			Nitab4.5_0004384g0050	Nitab4.5_0001002g0070		Nitab4.5_0007278g0010	Nitab4.5_0001925g0090			Nitab4.5_0009401g0060					Nitab4.5_0007169g0010
Nitab4.5_0004384g0060	Nitab4.5_0001443g0050			Nitab4.5_0001077g0060		Nitab4.5_0001197g0020			Nitab4.5_0005423g0030			Nitab4.5_0008832g0010	Nitab4.5_0000088g0040		Nitab4.5_0003656g0070	Nitab4.5_0000722g0020					Nitab4.5_0002230g0020			Nitab4.5_0004384g0060	Nitab4.5_0001216g0060		Nitab4.5_0000040g0110	Nitab4.5_0000007g0240			Nitab4.5_0000688g0170					Nitab4.5_0000678g0050
Nitab4.5_0000438g0070	Nitab4.5_0001822g0050			Nitab4.5_0004300g0240		Nitab4.5_0001550g0060			Nitab4.5_0000729g0130			Nitab4.5_0001413g0040	Nitab4.5_0007312g0030		Nitab4.5_0010620g0010	Nitab4.5_0007140g0010					Nitab4.5_0000446g0010			Nitab4.5_0000438g0070	Nitab4.5_0001538g0100		Nitab4.5_0003100g0030	Nitab4.5_0000062g0190			Nitab4.5_0003620g0020					Nitab4.5_0003838g0030
Nitab4.5_0006119g0050	Nitab4.5_0002605g0020			Nitab4.5_0005472g0030		Nitab4.5_0001651g0040			Nitab4.5_0004480g0050			Nitab4.5_0002084g0060	Nitab4.5_0003337g0010		Nitab4.5_0000602g0070	Nitab4.5_0000647g0190					Nitab4.5_0013465g0010			Nitab4.5_0006119g0050	Nitab4.5_0004756g0060		Nitab4.5_0000458g0020	Nitab4.5_0000062g0550			Nitab4.5_0000013g0380					Nitab4.5_0012940g0030
Nitab4.5_0003488g0030	Nitab4.5_0002732g0030			Nitab4.5_0017147g0010		Nitab4.5_0002153g0080			Nitab4.5_0000705g0050			Nitab4.5_0006914g0010	Nitab4.5_0001295g0030		Nitab4.5_0008429g0010	Nitab4.5_0007769g0020					Nitab4.5_0007414g0020			Nitab4.5_0007901g0010	Nitab4.5_0005096g0020		Nitab4.5_0007024g0050	Nitab4.5_0000098g0060			Nitab4.5_0000013g0390					Nitab4.5_0000143g0060
Nitab4.5_0000303g0160	Nitab4.5_0002732g0040			Nitab4.5_0007278g0030		Nitab4.5_0003213g0010			Nitab4.5_0006983g0020			Nitab4.5_0000568g0010	Nitab4.5_0000407g0130		Nitab4.5_0000610g0240	Nitab4.5_0000054g0090					Nitab4.5_0000888g0020			Nitab4.5_0001781g0060	Nitab4.5_0006272g0010		Nitab4.5_0000538g0030	Nitab4.5_0000113g0330			Nitab4.5_0003284g0010					Nitab4.5_0001477g0190
Nitab4.5_0001907g0040	Nitab4.5_0003268g0120			Nitab4.5_0015220g0010		Nitab4.5_0004688g0080			Nitab4.5_0007439g0020			Nitab4.5_0001128g0060	Nitab4.5_0001096g0030		Nitab4.5_0002231g0030	Nitab4.5_0000054g0100					Nitab4.5_0010523g0020			Nitab4.5_0011494g0030	Nitab4.5_0006745g0020		Nitab4.5_0003838g0090	Nitab4.5_0000326g0190			Nitab4.5_0003284g0040					Nitab4.5_0007138g0010
Nitab4.5_0002649g0020	Nitab4.5_0003426g0010			Nitab4.5_0000573g0100		Nitab4.5_0005743g0010			Nitab4.5_0000093g0110			Nitab4.5_0002980g0030	Nitab4.5_0002145g0030		Nitab4.5_0002297g0080	Nitab4.5_0002107g0030					Nitab4.5_0007620g0010			Nitab4.5_0000303g0160	Nitab4.5_0011122g0010		Nitab4.5_0000460g0040	Nitab4.5_0000383g0280			Nitab4.5_0000287g0110					Nitab4.5_0000417g0010
Nitab4.5_0002527g0060	Nitab4.5_0003671g0050			Nitab4.5_0001933g0090		Nitab4.5_0005754g0060			Nitab4.5_0000368g0130			Nitab4.5_0000875g0030	Nitab4.5_0004227g0010		Nitab4.5_0003810g0020	Nitab4.5_0004118g0120					Nitab4.5_0000062g0550			Nitab4.5_0000608g0140	Nitab4.5_0001781g0130		Nitab4.5_0001292g0050	Nitab4.5_0000425g0230			Nitab4.5_0001200g0050					Nitab4.5_0000269g0070
Nitab4.5_0000036g0040	Nitab4.5_0004353g0020			Nitab4.5_0002036g0020		Nitab4.5_0005963g0040			Nitab4.5_0000759g0270			Nitab4.5_0002183g0010	Nitab4.5_0000886g0020		Nitab4.5_0009965g0010	Nitab4.5_0002662g0090					Nitab4.5_0000109g0570			Nitab4.5_0001907g0040	Nitab4.5_0009933g0010		Nitab4.5_0002969g0010	Nitab4.5_0000596g0010			Nitab4.5_0001816g0010					Nitab4.5_0000143g0310
Nitab4.5_0000224g0050	Nitab4.5_0006402g0010			Nitab4.5_0013867g0010		Nitab4.5_0006545g0030			Nitab4.5_0001200g0080			Nitab4.5_0002887g0060	Nitab4.5_0006384g0020		Nitab4.5_0000082g0150	Nitab4.5_0002050g0120					Nitab4.5_0000425g0180			Nitab4.5_0002649g0020	Nitab4.5_0000142g0350		Nitab4.5_0005382g0010	Nitab4.5_0000634g0140			Nitab4.5_0002886g0100					Nitab4.5_0002214g0110
Nitab4.5_0000224g0060	Nitab4.5_0000198g0140			Nitab4.5_0009050g0050		Nitab4.5_0008204g0010			Nitab4.5_0000171g0100			Nitab4.5_0007150g0060	Nitab4.5_0007710g0010		Nitab4.5_0002839g0010	Nitab4.5_0010415g0020					Nitab4.5_0000425g0230			Nitab4.5_0010957g0010	Nitab4.5_0000246g0100		Nitab4.5_0003289g0010	Nitab4.5_0000941g0190			Nitab4.5_0000173g0130					Nitab4.5_0003030g0060
Nitab4.5_0000284g0080	Nitab4.5_0001503g0020			Nitab4.5_0001232g0120		Nitab4.5_0008490g0030			Nitab4.5_0002965g0020			Nitab4.5_0000356g0070	Nitab4.5_0012282g0030		Nitab4.5_0005615g0030	Nitab4.5_0005401g0040					Nitab4.5_0000571g0220			Nitab4.5_0000307g0060	Nitab4.5_0000537g0020		Nitab4.5_0003434g0070	Nitab4.5_0001215g0230			Nitab4.5_0006346g0010					Nitab4.5_0001969g0020
Nitab4.5_0000629g0040	Nitab4.5_0008680g0020			Nitab4.5_0008114g0010		Nitab4.5_0009215g0020			Nitab4.5_0003694g0060			Nitab4.5_0002139g0010	Nitab4.5_0013033g0010		Nitab4.5_0003587g0060	Nitab4.5_0003841g0080					Nitab4.5_0000941g0190			Nitab4.5_0002527g0060	Nitab4.5_0000831g0030		Nitab4.5_0000156g0180	Nitab4.5_0001486g0010			Nitab4.5_0001239g0110					Nitab4.5_0004567g0010
Nitab4.5_0003745g0060	Nitab4.5_0026414g0010			Nitab4.5_0008014g0010		Nitab4.5_0009737g0010			Nitab4.5_0003786g0010			Nitab4.5_0003037g0110	Nitab4.5_0000126g0060		Nitab4.5_0000078g0090	Nitab4.5_0006731g0040					Nitab4.5_0000944g0100			Nitab4.5_0000310g0190	Nitab4.5_0002629g0100		Nitab4.5_0005897g0040	Nitab4.5_0002180g0030			Nitab4.5_0001456g0180					Nitab4.5_0001438g0090
Nitab4.5_0001456g0110	Nitab4.5_0003694g0030			Nitab4.5_0002152g0060		Nitab4.5_0010037g0010			Nitab4.5_0002951g0020			Nitab4.5_0001349g0010	Nitab4.5_0002348g0030		Nitab4.5_0027211g0010	Nitab4.5_0000654g0010					Nitab4.5_0001506g0100			Nitab4.5_0000028g0420	Nitab4.5_0006823g0010		Nitab4.5_0005169g0010	Nitab4.5_0002315g0090			Nitab4.5_0000397g0010					Nitab4.5_0006701g0010
Nitab4.5_0001762g0040	Nitab4.5_0000657g0010			Nitab4.5_0002002g0050		Nitab4.5_0012555g0050			Nitab4.5_0003884g0010			Nitab4.5_0004513g0010	Nitab4.5_0002315g0110		Nitab4.5_0001614g0200	Nitab4.5_0002456g0090					Nitab4.5_0001530g0150			Nitab4.5_0000036g0040	Nitab4.5_0011793g0010		Nitab4.5_0000319g0420	Nitab4.5_0002378g0030			Nitab4.5_0000639g0190					Nitab4.5_0010814g0020
Nitab4.5_0001965g0080	Nitab4.5_0013947g0020			Nitab4.5_0001507g0070					Nitab4.5_0000113g0160			Nitab4.5_0005658g0030	Nitab4.5_0000023g0490		Nitab4.5_0007261g0070	Nitab4.5_0022449g0010					Nitab4.5_0001820g0110			Nitab4.5_0000224g0050	Nitab4.5_0000365g0040		Nitab4.5_0011765g0020	Nitab4.5_0002427g0020			Nitab4.5_0010205g0030					Nitab4.5_0000143g0510
Nitab4.5_0003968g0020	Nitab4.5_0001109g0020			Nitab4.5_0004275g0010					Nitab4.5_0002124g0010			Nitab4.5_0004052g0010	Nitab4.5_0000023g0560		Nitab4.5_0007767g0040	Nitab4.5_0000105g0080					Nitab4.5_0002692g0050			Nitab4.5_0000224g0060	Nitab4.5_0000920g0140		Nitab4.5_0000102g0030	Nitab4.5_0003213g0010			Nitab4.5_0000093g0110					Nitab4.5_0009745g0020
Nitab4.5_0000036g0500	Nitab4.5_0015447g0010			Nitab4.5_0000074g0190					Nitab4.5_0003857g0040			Nitab4.5_0000826g0090	Nitab4.5_0000023g0610		Nitab4.5_0002100g0050	Nitab4.5_0000326g0130					Nitab4.5_0003779g0200			Nitab4.5_0000224g0070	Nitab4.5_0013736g0010		Nitab4.5_0001265g0010	Nitab4.5_0003260g0010			Nitab4.5_0000396g0170					Nitab4.5_0000143g0100
Nitab4.5_0000863g0010	Nitab4.5_0008766g0010			Nitab4.5_0000425g0230					Nitab4.5_0013596g0010			Nitab4.5_0001319g0030	Nitab4.5_0000070g0020		Nitab4.5_0004338g0090	Nitab4.5_0000676g0130					Nitab4.5_0004038g0030			Nitab4.5_0000284g0080	Nitab4.5_0000461g0010		Nitab4.5_0001453g0050	Nitab4.5_0004288g0020			Nitab4.5_0002345g0050					Nitab4.5_0000123g0490
Nitab4.5_0002664g0030	Nitab4.5_0001696g0070			Nitab4.5_0000929g0150					Nitab4.5_0006960g0030			Nitab4.5_0001618g0140	Nitab4.5_0000175g0380		Nitab4.5_0000227g0180	Nitab4.5_0001925g0250					Nitab4.5_0004521g0020			Nitab4.5_0000629g0040	Nitab4.5_0000514g0170		Nitab4.5_0007303g0040	Nitab4.5_0004390g0020			Nitab4.5_0000267g0090					Nitab4.5_0000143g0300
Nitab4.5_0003855g0020	Nitab4.5_0003280g0030			Nitab4.5_0001337g0060					Nitab4.5_0002241g0040			Nitab4.5_0000010g0290	Nitab4.5_0000175g0440		Nitab4.5_0000231g0180	Nitab4.5_0000819g0150					Nitab4.5_0006370g0020			Nitab4.5_0003745g0060	Nitab4.5_0000944g0030		Nitab4.5_0002434g0030	Nitab4.5_0004937g0020			Nitab4.5_0000527g0250					Nitab4.5_0003430g0060
Nitab4.5_0006625g0030	Nitab4.5_0004259g0030			Nitab4.5_0001486g0010					Nitab4.5_0003715g0060			Nitab4.5_0001806g0030	Nitab4.5_0000175g0480		Nitab4.5_0001118g0040	Nitab4.5_0000688g0170					Nitab4.5_0008548g0020			Nitab4.5_0000529g0080	Nitab4.5_0000900g0050		Nitab4.5_0008628g0010	Nitab4.5_0005664g0070			Nitab4.5_0006878g0010					Nitab4.5_0000143g0290
Nitab4.5_0009467g0010	Nitab4.5_0010063g0010			Nitab4.5_0001650g0020					Nitab4.5_0000027g0570			Nitab4.5_0000106g0260	Nitab4.5_0000221g0060		Nitab4.5_0007460g0010	Nitab4.5_0001267g0050					Nitab4.5_0008663g0020			Nitab4.5_0001456g0110	Nitab4.5_0006634g0010		Nitab4.5_0010853g0040	Nitab4.5_0006365g0060			Nitab4.5_0012224g0020					Nitab4.5_0000649g0210
Nitab4.5_0009593g0010	Nitab4.5_0000273g0030			Nitab4.5_0001820g0110					Nitab4.5_0000057g0200			Nitab4.5_0005283g0040	Nitab4.5_0000221g0180		Nitab4.5_0022963g0010	Nitab4.5_0007303g0020					Nitab4.5_0008814g0030			Nitab4.5_0001762g0040	Nitab4.5_0009577g0040		Nitab4.5_0000681g0020	Nitab4.5_0007546g0020			Nitab4.5_0000212g0210					Nitab4.5_0000297g0160
Nitab4.5_0011970g0010	Nitab4.5_0005150g0050			Nitab4.5_0002569g0100					Nitab4.5_0000109g0550			Nitab4.5_0000452g0010	Nitab4.5_0000227g0100		Nitab4.5_0000308g0230	Nitab4.5_0007487g0020					Nitab4.5_0009781g0010			Nitab4.5_0001965g0080	Nitab4.5_0010146g0020		Nitab4.5_0003827g0030	Nitab4.5_0008390g0040			Nitab4.5_0000306g0050					Nitab4.5_0002214g0060
Nitab4.5_0012644g0010	Nitab4.5_0000742g0110			Nitab4.5_0003213g0010					Nitab4.5_0000116g0120			Nitab4.5_0001894g0040	Nitab4.5_0000280g0120		Nitab4.5_0000218g0070	Nitab4.5_0003348g0050					Nitab4.5_0010037g0010			Nitab4.5_0003968g0020	Nitab4.5_0011695g0010		Nitab4.5_0008704g0020	Nitab4.5_0008928g0010			Nitab4.5_0000005g0340					Nitab4.5_0000004g0340
Nitab4.5_0001730g0160	Nitab4.5_0002700g0120			Nitab4.5_0003668g0050					Nitab4.5_0000242g0110			Nitab4.5_0011123g0010	Nitab4.5_0000488g0160		Nitab4.5_0001654g0020	Nitab4.5_0000861g0050					Nitab4.5_0012555g0050			Nitab4.5_0000036g0500	Nitab4.5_0000376g0140		Nitab4.5_0001896g0050	Nitab4.5_0009820g0010			Nitab4.5_0000021g0310					Nitab4.5_0000005g0440
Nitab4.5_0005756g0040	Nitab4.5_0005968g0030			Nitab4.5_0004179g0030					Nitab4.5_0000404g0060			Nitab4.5_0005797g0010	Nitab4.5_0000822g0040		Nitab4.5_0000140g0140	Nitab4.5_0000209g0200					Nitab4.5_0027851g0010			Nitab4.5_0000321g0270	Nitab4.5_0002162g0230		Nitab4.5_0001039g0020	Nitab4.5_0010557g0040			Nitab4.5_0000027g0500					Nitab4.5_0000143g0180
Nitab4.5_0000264g0050	Nitab4.5_0009867g0010			Nitab4.5_0004349g0020					Nitab4.5_0000584g0040			Nitab4.5_0004155g0030	Nitab4.5_0000822g0050		Nitab4.5_0001714g0230	Nitab4.5_0026203g0010								Nitab4.5_0002664g0030	Nitab4.5_0005744g0010		Nitab4.5_0001373g0090	Nitab4.5_0010740g0020			Nitab4.5_0000175g0110					Nitab4.5_0000143g0370
Nitab4.5_0001200g0140	Nitab4.5_0000195g0240			Nitab4.5_0008928g0010					Nitab4.5_0000649g0060			Nitab4.5_0002091g0010	Nitab4.5_0001175g0050		Nitab4.5_0002228g0030	Nitab4.5_0001580g0120								Nitab4.5_0003855g0020	Nitab4.5_0012103g0010		Nitab4.5_0000311g0030	Nitab4.5_0011569g0010			Nitab4.5_0000188g0110					Nitab4.5_0000143g0420
Nitab4.5_0007065g0010	Nitab4.5_0003032g0010			Nitab4.5_0019458g0010					Nitab4.5_0000780g0080			Nitab4.5_0002759g0010	Nitab4.5_0001196g0100		Nitab4.5_0000855g0140	Nitab4.5_0011049g0010								Nitab4.5_0006625g0030	Nitab4.5_0000511g0060		Nitab4.5_0006334g0020	Nitab4.5_0011745g0020			Nitab4.5_0000256g0160					Nitab4.5_0000244g0100
Nitab4.5_0014302g0010	Nitab4.5_0003654g0010								Nitab4.5_0000784g0040			Nitab4.5_0000718g0210	Nitab4.5_0001196g0130		Nitab4.5_0011583g0030	Nitab4.5_0010979g0020								Nitab4.5_0009467g0010	Nitab4.5_0003491g0060		Nitab4.5_0000044g0590	Nitab4.5_0013629g0010			Nitab4.5_0000305g0360					Nitab4.5_0000246g0110
Nitab4.5_0000201g0190	Nitab4.5_0002441g0010								Nitab4.5_0000803g0050			Nitab4.5_0001089g0070	Nitab4.5_0001443g0010		Nitab4.5_0008709g0030	Nitab4.5_0000073g0400								Nitab4.5_0009593g0010	Nitab4.5_0001268g0020		Nitab4.5_0007025g0020				Nitab4.5_0000461g0300					Nitab4.5_0000256g0160
Nitab4.5_0010112g0030	Nitab4.5_0008962g0050								Nitab4.5_0001151g0010			Nitab4.5_0003313g0020	Nitab4.5_0001443g0050		Nitab4.5_0001381g0120	Nitab4.5_0000421g0150								Nitab4.5_0011213g0010	Nitab4.5_0002916g0030		Nitab4.5_0000652g0100				Nitab4.5_0000595g0070					Nitab4.5_0000260g0100
Nitab4.5_0021050g0010	Nitab4.5_0000152g0180								Nitab4.5_0001151g0020			Nitab4.5_0001553g0030	Nitab4.5_0002365g0050		Nitab4.5_0002289g0070	Nitab4.5_0002998g0070								Nitab4.5_0011970g0010	Nitab4.5_0003768g0020		Nitab4.5_0002212g0020				Nitab4.5_0000698g0020					Nitab4.5_0000321g0040
Nitab4.5_0001519g0040	Nitab4.5_0000188g0090								Nitab4.5_0001521g0050			Nitab4.5_0001704g0020	Nitab4.5_0002605g0020		Nitab4.5_0017035g0010	Nitab4.5_0000305g0210								Nitab4.5_0012644g0010	Nitab4.5_0018681g0010		Nitab4.5_0000440g0170				Nitab4.5_0000839g0160					Nitab4.5_0000365g0060
Nitab4.5_0002642g0120	Nitab4.5_0000864g0040								Nitab4.5_0001671g0150			Nitab4.5_0001980g0060	Nitab4.5_0002732g0030		Nitab4.5_0023951g0010	Nitab4.5_0013739g0010								Nitab4.5_0001730g0160	Nitab4.5_0004469g0030		Nitab4.5_0000096g0270				Nitab4.5_0000855g0160					Nitab4.5_0000512g0220
Nitab4.5_0002824g0120	Nitab4.5_0001303g0110								Nitab4.5_0001922g0090			Nitab4.5_0002605g0010	Nitab4.5_0003268g0120		Nitab4.5_0000967g0110	Nitab4.5_0000028g0320								Nitab4.5_0005756g0040	Nitab4.5_0000082g0370		Nitab4.5_0002799g0040				Nitab4.5_0000902g0090					Nitab4.5_0000595g0060
Nitab4.5_0007302g0010	Nitab4.5_0003290g0030								Nitab4.5_0002059g0090			Nitab4.5_0003553g0090	Nitab4.5_0003426g0010		Nitab4.5_0006024g0010	Nitab4.5_0006833g0020								Nitab4.5_0009034g0010	Nitab4.5_0000917g0020		Nitab4.5_0005845g0030				Nitab4.5_0000902g0210					Nitab4.5_0000595g0070
Nitab4.5_0000026g0440	Nitab4.5_0005707g0010								Nitab4.5_0002059g0100			Nitab4.5_0003725g0040	Nitab4.5_0003671g0050		Nitab4.5_0002150g0080	Nitab4.5_0001208g0090								Nitab4.5_0007065g0010	Nitab4.5_0001902g0020		Nitab4.5_0000132g0430				Nitab4.5_0001097g0110					Nitab4.5_0000791g0090
Nitab4.5_0001422g0130	Nitab4.5_0000408g0150								Nitab4.5_0002312g0100			Nitab4.5_0004585g0050	Nitab4.5_0004353g0020		Nitab4.5_0000702g0050	Nitab4.5_0008278g0020								Nitab4.5_0014302g0010	Nitab4.5_0003368g0020		Nitab4.5_0000262g0180				Nitab4.5_0001109g0120					Nitab4.5_0000812g0120
Nitab4.5_0006432g0020	Nitab4.5_0001955g0110								Nitab4.5_0002312g0110			Nitab4.5_0009910g0020	Nitab4.5_0006402g0010		Nitab4.5_0000073g0270	Nitab4.5_0002855g0020								Nitab4.5_0000062g0390	Nitab4.5_0000085g0220		Nitab4.5_0000072g0590				Nitab4.5_0001122g0060					Nitab4.5_0000902g0150
Nitab4.5_0006493g0020	Nitab4.5_0006983g0010								Nitab4.5_0003721g0040			Nitab4.5_0013129g0010	Nitab4.5_0007315g0010		Nitab4.5_0004234g0080	Nitab4.5_0000922g0020								Nitab4.5_0005702g0030	Nitab4.5_0000254g0020		Nitab4.5_0000072g0600				Nitab4.5_0001122g0070					Nitab4.5_0000902g0190
Nitab4.5_0001413g0040	Nitab4.5_0000697g0070								Nitab4.5_0004776g0090			Nitab4.5_0003642g0040	Nitab4.5_0000198g0140		Nitab4.5_0001194g0050	Nitab4.5_0001604g0060								Nitab4.5_0000201g0190	Nitab4.5_0000826g0150		Nitab4.5_0001383g0170				Nitab4.5_0001122g0100					Nitab4.5_0000914g0280
Nitab4.5_0001899g0010	Nitab4.5_0002223g0050								Nitab4.5_0005247g0020			Nitab4.5_0000380g0160	Nitab4.5_0000703g0170		Nitab4.5_0000782g0030	Nitab4.5_0008677g0030								Nitab4.5_0004679g0090	Nitab4.5_0001618g0240		Nitab4.5_0001780g0010				Nitab4.5_0001303g0030					Nitab4.5_0001071g0030
Nitab4.5_0004334g0030	Nitab4.5_0002260g0120								Nitab4.5_0007212g0010			Nitab4.5_0009507g0010	Nitab4.5_0001503g0020		Nitab4.5_0000782g0070	Nitab4.5_0007095g0010								Nitab4.5_0010112g0030	Nitab4.5_0004226g0010		Nitab4.5_0010733g0010				Nitab4.5_0001695g0010					Nitab4.5_0001122g0060
Nitab4.5_0000190g0190	Nitab4.5_0005597g0040								Nitab4.5_0007767g0020			Nitab4.5_0002543g0040	Nitab4.5_0003106g0020		Nitab4.5_0003040g0010	Nitab4.5_0000036g0410								Nitab4.5_0021050g0010	Nitab4.5_0005470g0010		Nitab4.5_0014760g0010				Nitab4.5_0001937g0020					Nitab4.5_0001122g0070
Nitab4.5_0003223g0050	Nitab4.5_0006920g0040								Nitab4.5_0008298g0010			Nitab4.5_0000564g0060	Nitab4.5_0003823g0010		Nitab4.5_0010672g0010	Nitab4.5_0000116g0120								Nitab4.5_0001519g0040	Nitab4.5_0004924g0030		Nitab4.5_0000457g0400				Nitab4.5_0002379g0010					Nitab4.5_0001303g0030
Nitab4.5_0000059g0090	Nitab4.5_0006920g0050								Nitab4.5_0008551g0010			Nitab4.5_0006318g0010	Nitab4.5_0006086g0010		Nitab4.5_0006650g0010	Nitab4.5_0000169g0080								Nitab4.5_0002642g0120	Nitab4.5_0000728g0020		Nitab4.5_0000838g0030				Nitab4.5_0002674g0010					Nitab4.5_0001545g0020
Nitab4.5_0000356g0070	Nitab4.5_0000337g0060								Nitab4.5_0009232g0010			Nitab4.5_0001239g0100	Nitab4.5_0008680g0020		Nitab4.5_0002338g0020	Nitab4.5_0000391g0110								Nitab4.5_0002824g0120	Nitab4.5_0004623g0010		Nitab4.5_0006518g0030				Nitab4.5_0002861g0020					Nitab4.5_0001668g0040
Nitab4.5_0000875g0030	Nitab4.5_0000337g0070								Nitab4.5_0010125g0040			Nitab4.5_0002265g0050	Nitab4.5_0026414g0010		Nitab4.5_0005830g0010	Nitab4.5_0000803g0050								Nitab4.5_0007302g0010	Nitab4.5_0006001g0010		Nitab4.5_0010217g0020				Nitab4.5_0002863g0030					Nitab4.5_0001749g0070
Nitab4.5_0001349g0010	Nitab4.5_0003251g0080								Nitab4.5_0016805g0010			Nitab4.5_0000350g0260	Nitab4.5_0003694g0030		Nitab4.5_0000915g0100	Nitab4.5_0000874g0150								Nitab4.5_0000326g0230	Nitab4.5_0000368g0160		Nitab4.5_0000744g0200				Nitab4.5_0004318g0080					Nitab4.5_0002193g0040
Nitab4.5_0002084g0060	Nitab4.5_0005120g0100								Nitab4.5_0012349g0020			Nitab4.5_0000625g0040	Nitab4.5_0000657g0010		Nitab4.5_0010695g0040	Nitab4.5_0000874g0170								Nitab4.5_0000026g0440	Nitab4.5_0008173g0030		Nitab4.5_0005658g0020				Nitab4.5_0004650g0010					Nitab4.5_0002231g0100
Nitab4.5_0002139g0010	Nitab4.5_0018240g0010								Nitab4.5_0000489g0090			Nitab4.5_0000901g0090	Nitab4.5_0013947g0020		Nitab4.5_0010236g0020	Nitab4.5_0000906g0110								Nitab4.5_0001422g0130	Nitab4.5_0009646g0030		Nitab4.5_0003337g0100				Nitab4.5_0005059g0020					Nitab4.5_0002252g0100
Nitab4.5_0002183g0010	Nitab4.5_0000009g0510								Nitab4.5_0000680g0130			Nitab4.5_0001648g0030	Nitab4.5_0000508g0220		Nitab4.5_0003179g0050	Nitab4.5_0000914g0280								Nitab4.5_0006432g0020	Nitab4.5_0000088g0040		Nitab4.5_0000669g0080				Nitab4.5_0005469g0020					Nitab4.5_0002327g0030
Nitab4.5_0002887g0060	Nitab4.5_0002380g0030								Nitab4.5_0004348g0010			Nitab4.5_0002456g0060	Nitab4.5_0002926g0020		Nitab4.5_0009569g0010	Nitab4.5_0000934g0160								Nitab4.5_0006493g0020	Nitab4.5_0007312g0030		Nitab4.5_0000631g0070				Nitab4.5_0005565g0040					Nitab4.5_0002826g0080
Nitab4.5_0003037g0110	Nitab4.5_0000978g0100								Nitab4.5_0000109g0250			Nitab4.5_0000414g0010	Nitab4.5_0008766g0010		Nitab4.5_0003738g0070	Nitab4.5_0000976g0150								Nitab4.5_0008832g0010	Nitab4.5_0000203g0120		Nitab4.5_0001417g0090				Nitab4.5_0005660g0010					Nitab4.5_0002863g0030
Nitab4.5_0004513g0010	Nitab4.5_0002466g0010								Nitab4.5_0009050g0050			Nitab4.5_0000914g0180	Nitab4.5_0001451g0070		Nitab4.5_0000906g0020	Nitab4.5_0001122g0040								Nitab4.5_0011716g0010	Nitab4.5_0005813g0010		Nitab4.5_0000007g0230				Nitab4.5_0005722g0040					Nitab4.5_0003079g0010
Nitab4.5_0005658g0030	Nitab4.5_0000495g0040								Nitab4.5_0000522g0240			Nitab4.5_0024190g0010	Nitab4.5_0003280g0030		Nitab4.5_0001301g0140	Nitab4.5_0001264g0230								Nitab4.5_0014673g0010	Nitab4.5_0008620g0010		Nitab4.5_0006924g0010				Nitab4.5_0005739g0060					Nitab4.5_0003419g0080
Nitab4.5_0006914g0010	Nitab4.5_0006054g0010								Nitab4.5_0007375g0020			Nitab4.5_0001239g0160	Nitab4.5_0001187g0030		Nitab4.5_0000559g0450	Nitab4.5_0001304g0030								Nitab4.5_0000190g0190	Nitab4.5_0002037g0010		Nitab4.5_0000068g0430				Nitab4.5_0006286g0060					Nitab4.5_0003657g0020
Nitab4.5_0007150g0060	Nitab4.5_0000321g0220								Nitab4.5_0025760g0010			Nitab4.5_0001239g0170	Nitab4.5_0001344g0020		Nitab4.5_0000681g0150	Nitab4.5_0001307g0080								Nitab4.5_0000083g0240	Nitab4.5_0001295g0030		Nitab4.5_0006444g0020				Nitab4.5_0007120g0020					Nitab4.5_0005006g0020
Nitab4.5_0004052g0010	Nitab4.5_0000322g0180								Nitab4.5_0000184g0280			Nitab4.5_0005999g0010	Nitab4.5_0010063g0010		Nitab4.5_0003322g0030	Nitab4.5_0001735g0090								Nitab4.5_0000356g0070	Nitab4.5_0007429g0010		Nitab4.5_0009182g0010				Nitab4.5_0010657g0040					Nitab4.5_0005081g0100
Nitab4.5_0000826g0090	Nitab4.5_0001756g0150								Nitab4.5_0001000g0160			Nitab4.5_0006969g0030	Nitab4.5_0005504g0030		Nitab4.5_0009454g0010	Nitab4.5_0001778g0160								Nitab4.5_0000875g0030	Nitab4.5_0009835g0020		Nitab4.5_0010516g0040				Nitab4.5_0001017g0090					Nitab4.5_0005722g0040
Nitab4.5_0001319g0030	Nitab4.5_0000332g0190								Nitab4.5_0007691g0010			Nitab4.5_0000136g0240	Nitab4.5_0011483g0010		Nitab4.5_0013202g0010	Nitab4.5_0001922g0090								Nitab4.5_0001349g0010	Nitab4.5_0004298g0060		Nitab4.5_0000308g0390				Nitab4.5_0000761g0110					Nitab4.5_0005728g0010
Nitab4.5_0001618g0140	Nitab4.5_0003033g0050								Nitab4.5_0002568g0030			Nitab4.5_0001525g0020	Nitab4.5_0000507g0120		Nitab4.5_0001928g0020	Nitab4.5_0001971g0050								Nitab4.5_0002084g0060	Nitab4.5_0000407g0130		Nitab4.5_0005409g0020				Nitab4.5_0001190g0030					Nitab4.5_0006338g0010
Nitab4.5_0001806g0030	Nitab4.5_0011677g0020								Nitab4.5_0012161g0030			Nitab4.5_0000723g0220	Nitab4.5_0000781g0040		Nitab4.5_0004449g0050	Nitab4.5_0002405g0050								Nitab4.5_0002139g0010	Nitab4.5_0009652g0010		Nitab4.5_0005003g0140				Nitab4.5_0001858g0030					Nitab4.5_0007427g0010
Nitab4.5_0000106g0260	Nitab4.5_0001608g0010								Nitab4.5_0000039g0060			Nitab4.5_0003313g0010	Nitab4.5_0004553g0030		Nitab4.5_0003908g0010	Nitab4.5_0002827g0030								Nitab4.5_0002183g0010	Nitab4.5_0000178g0150		Nitab4.5_0001702g0210				Nitab4.5_0006863g0010					Nitab4.5_0009517g0010
Nitab4.5_0005283g0040	Nitab4.5_0003718g0010								Nitab4.5_0000267g0110			Nitab4.5_0006876g0010	Nitab4.5_0007380g0040		Nitab4.5_0000043g0330	Nitab4.5_0003077g0030								Nitab4.5_0002887g0060	Nitab4.5_0008908g0010		Nitab4.5_0010110g0030				Nitab4.5_0011330g0010					Nitab4.5_0010430g0070
Nitab4.5_0000452g0010	Nitab4.5_0001560g0030								Nitab4.5_0002630g0010			Nitab4.5_0000638g0190	Nitab4.5_0000742g0110		Nitab4.5_0000137g0100	Nitab4.5_0003178g0050								Nitab4.5_0003037g0110	Nitab4.5_0001096g0030		Nitab4.5_0000142g0340				Nitab4.5_0002098g0010					Nitab4.5_0012112g0020
Nitab4.5_0007411g0030	Nitab4.5_0006286g0070								Nitab4.5_0001675g0050			Nitab4.5_0000585g0150	Nitab4.5_0002700g0120		Nitab4.5_0002898g0030	Nitab4.5_0003229g0110								Nitab4.5_0004513g0010	Nitab4.5_0002145g0030		Nitab4.5_0000296g0110				Nitab4.5_0000408g0030					Nitab4.5_0002863g0010
Nitab4.5_0011123g0010	Nitab4.5_0000132g0490								Nitab4.5_0001675g0070			Nitab4.5_0000238g0090	Nitab4.5_0009867g0010		Nitab4.5_0003156g0110	Nitab4.5_0003234g0120								Nitab4.5_0005658g0030	Nitab4.5_0006998g0030		Nitab4.5_0003766g0010				Nitab4.5_0001726g0050					Nitab4.5_0002285g0030
Nitab4.5_0000343g0190	Nitab4.5_0002626g0010								Nitab4.5_0013465g0010			Nitab4.5_0007882g0010	Nitab4.5_0003654g0010		Nitab4.5_0006391g0020	Nitab4.5_0003330g0020								Nitab4.5_0006914g0010	Nitab4.5_0000886g0020		Nitab4.5_0005090g0030				Nitab4.5_0000004g0100					Nitab4.5_0006886g0010
Nitab4.5_0005797g0010	Nitab4.5_0008822g0030								Nitab4.5_0000244g0350			Nitab4.5_0000916g0100	Nitab4.5_0002441g0010		Nitab4.5_0000022g0200	Nitab4.5_0003330g0030								Nitab4.5_0007150g0060	Nitab4.5_0006384g0020		Nitab4.5_0005615g0010				Nitab4.5_0004559g0010					Nitab4.5_0000014g0090
Nitab4.5_0005161g0080	Nitab4.5_0004147g0030								Nitab4.5_0009499g0020			Nitab4.5_0011081g0020	Nitab4.5_0008962g0050		Nitab4.5_0000547g0020	Nitab4.5_0003876g0030								Nitab4.5_0004052g0010	Nitab4.5_0012282g0030		Nitab4.5_0000707g0200				Nitab4.5_0006795g0020					Nitab4.5_0000040g0130
Nitab4.5_0013015g0020	Nitab4.5_0006180g0020								Nitab4.5_0000439g0050			Nitab4.5_0003871g0020	Nitab4.5_0000152g0180		Nitab4.5_0001721g0010	Nitab4.5_0004576g0010								Nitab4.5_0000826g0090	Nitab4.5_0000126g0060		Nitab4.5_0008441g0030				Nitab4.5_0000147g0140					Nitab4.5_0004300g0240
Nitab4.5_0000745g0090	Nitab4.5_0001951g0010								Nitab4.5_0007185g0030			Nitab4.5_0008568g0040	Nitab4.5_0000188g0090		Nitab4.5_0000164g0200	Nitab4.5_0005251g0010								Nitab4.5_0001319g0030	Nitab4.5_0002348g0030		Nitab4.5_0000187g0270				Nitab4.5_0000040g0600					Nitab4.5_0005472g0030
Nitab4.5_0002091g0010	Nitab4.5_0000008g0270								Nitab4.5_0000490g0020			Nitab4.5_0000163g0110	Nitab4.5_0000864g0040		Nitab4.5_0001772g0020	Nitab4.5_0005283g0070								Nitab4.5_0001618g0140	Nitab4.5_0002315g0110		Nitab4.5_0001044g0100				Nitab4.5_0000198g0190					Nitab4.5_0017147g0010
Nitab4.5_0002759g0010	Nitab4.5_0000278g0030								Nitab4.5_0007276g0010			Nitab4.5_0007779g0010	Nitab4.5_0001303g0110		Nitab4.5_0005385g0030	Nitab4.5_0005297g0010								Nitab4.5_0000010g0290	Nitab4.5_0006408g0010		Nitab4.5_0000285g0020				Nitab4.5_0000550g0040					Nitab4.5_0000573g0100
Nitab4.5_0000492g0230	Nitab4.5_0000278g0040								Nitab4.5_0007414g0020			Nitab4.5_0006867g0010	Nitab4.5_0002337g0010		Nitab4.5_0003710g0030	Nitab4.5_0005565g0040								Nitab4.5_0001806g0030	Nitab4.5_0000207g0200		Nitab4.5_0001764g0100				Nitab4.5_0000941g0190					Nitab4.5_0000143g0530
Nitab4.5_0000718g0210	Nitab4.5_0000640g0170								Nitab4.5_0000888g0020			Nitab4.5_0001952g0140	Nitab4.5_0003290g0030		Nitab4.5_0001842g0060	Nitab4.5_0006201g0010								Nitab4.5_0005283g0040	Nitab4.5_0001320g0150		Nitab4.5_0000016g0160				Nitab4.5_0001128g0180					Nitab4.5_0005081g0070
Nitab4.5_0005212g0050	Nitab4.5_0002443g0040								Nitab4.5_0003498g0040			Nitab4.5_0005206g0010	Nitab4.5_0005707g0010		Nitab4.5_0000213g0030	Nitab4.5_0007199g0010								Nitab4.5_0000452g0010	Nitab4.5_0009493g0010		Nitab4.5_0002975g0030				Nitab4.5_0001215g0230					Nitab4.5_0000143g0520
Nitab4.5_0002740g0080	Nitab4.5_0007994g0010								Nitab4.5_0009215g0010			Nitab4.5_0000021g0570	Nitab4.5_0000697g0070		Nitab4.5_0002932g0010	Nitab4.5_0007454g0010								Nitab4.5_0007411g0030	Nitab4.5_0001028g0190		Nitab4.5_0001965g0010				Nitab4.5_0002062g0020					Nitab4.5_0001308g0120
Nitab4.5_0019677g0010	Nitab4.5_0000598g0020								Nitab4.5_0000257g0090			Nitab4.5_0000179g0010	Nitab4.5_0005597g0040		Nitab4.5_0001540g0080	Nitab4.5_0008572g0020								Nitab4.5_0011123g0010	Nitab4.5_0001221g0070		Nitab4.5_0001614g0150				Nitab4.5_0003025g0010					Nitab4.5_0004476g0050
Nitab4.5_0000070g0010	Nitab4.5_0005728g0020								Nitab4.5_0010523g0020			Nitab4.5_0000301g0030	Nitab4.5_0000337g0060		Nitab4.5_0000036g0460	Nitab4.5_0008716g0010								Nitab4.5_0000343g0190	Nitab4.5_0000013g0540		Nitab4.5_0007384g0030				Nitab4.5_0003076g0010					Nitab4.5_0000329g0220
Nitab4.5_0000295g0070	Nitab4.5_0007482g0020								Nitab4.5_0000874g0020			Nitab4.5_0000556g0240	Nitab4.5_0000337g0070		Nitab4.5_0000123g0170	Nitab4.5_0008775g0010								Nitab4.5_0005797g0010	Nitab4.5_0000023g0490		Nitab4.5_0000347g0060				Nitab4.5_0003513g0010					Nitab4.5_0001819g0100
Nitab4.5_0001089g0070	Nitab4.5_0000397g0160								Nitab4.5_0000426g0050			Nitab4.5_0001762g0080	Nitab4.5_0003251g0080		Nitab4.5_0005180g0040	Nitab4.5_0008798g0020								Nitab4.5_0008957g0050	Nitab4.5_0000023g0610		Nitab4.5_0005475g0010				Nitab4.5_0003967g0020					Nitab4.5_0002214g0080
Nitab4.5_0001107g0110	Nitab4.5_0000278g0010								Nitab4.5_0000569g0020			Nitab4.5_0004528g0020	Nitab4.5_0005120g0100		Nitab4.5_0022027g0010	Nitab4.5_0009211g0010								Nitab4.5_0005171g0020	Nitab4.5_0000032g0080		Nitab4.5_0000647g0160				Nitab4.5_0006000g0050					Nitab4.5_0000143g0170
Nitab4.5_0001553g0030	Nitab4.5_0012752g0010								Nitab4.5_0007620g0010			Nitab4.5_0008679g0010	Nitab4.5_0000009g0510		Nitab4.5_0000239g0100	Nitab4.5_0009392g0010								Nitab4.5_0013015g0020	Nitab4.5_0000070g0020		Nitab4.5_0002649g0110				Nitab4.5_0006429g0030					Nitab4.5_0000143g0270
Nitab4.5_0001651g0050	Nitab4.5_0000008g0240								Nitab4.5_0000040g0600			Nitab4.5_0002529g0060	Nitab4.5_0000978g0100		Nitab4.5_0005319g0030	Nitab4.5_0010125g0040								Nitab4.5_0001060g0060	Nitab4.5_0000221g0060		Nitab4.5_0008967g0020				Nitab4.5_0008582g0010					Nitab4.5_0000941g0190
Nitab4.5_0001704g0020	Nitab4.5_0003981g0080								Nitab4.5_0000062g0550			Nitab4.5_0000976g0270	Nitab4.5_0002466g0010		Nitab4.5_0001119g0080	Nitab4.5_0010510g0010								Nitab4.5_0002091g0010	Nitab4.5_0000221g0110		Nitab4.5_0001531g0020				Nitab4.5_0010745g0010					Nitab4.5_0001259g0020
Nitab4.5_0001980g0060	Nitab4.5_0000286g0050								Nitab4.5_0000109g0570			Nitab4.5_0007669g0010	Nitab4.5_0000416g0220		Nitab4.5_0000585g0160	Nitab4.5_0010785g0020								Nitab4.5_0002759g0010	Nitab4.5_0000227g0330		Nitab4.5_0002462g0020				Nitab4.5_0011538g0020					Nitab4.5_0001296g0170
Nitab4.5_0002605g0010	Nitab4.5_0000286g0060								Nitab4.5_0000425g0180			Nitab4.5_0024059g0010	Nitab4.5_0000495g0040		Nitab4.5_0001428g0080	Nitab4.5_0012929g0010								Nitab4.5_0000244g0160	Nitab4.5_0000280g0120		Nitab4.5_0006190g0010				Nitab4.5_0022020g0010					Nitab4.5_0001438g0010
Nitab4.5_0003134g0060	Nitab4.5_0000738g0040								Nitab4.5_0000425g0230			Nitab4.5_0003234g0140	Nitab4.5_0006054g0010		Nitab4.5_0002220g0060	Nitab4.5_0015562g0010								Nitab4.5_0000718g0210	Nitab4.5_0000488g0160		Nitab4.5_0000589g0020				Nitab4.5_0022736g0010					Nitab4.5_0001816g0060
Nitab4.5_0003313g0020	Nitab4.5_0011739g0010								Nitab4.5_0000705g0140			Nitab4.5_0011198g0010	Nitab4.5_0000321g0220		Nitab4.5_0000863g0190	Nitab4.5_0023385g0010								Nitab4.5_0001603g0020	Nitab4.5_0001175g0050		Nitab4.5_0000233g0250									Nitab4.5_0003513g0010
Nitab4.5_0003725g0040	Nitab4.5_0000288g0110								Nitab4.5_0000718g0110			Nitab4.5_0000710g0040	Nitab4.5_0000322g0180		Nitab4.5_0002854g0110	Nitab4.5_0007134g0010								Nitab4.5_0000070g0010	Nitab4.5_0001196g0100		Nitab4.5_0000757g0060									Nitab4.5_0003726g0120
Nitab4.5_0003798g0020	Nitab4.5_0003247g0010								Nitab4.5_0000771g0160			Nitab4.5_0010078g0010	Nitab4.5_0003719g0050		Nitab4.5_0009202g0010	Nitab4.5_0004787g0010								Nitab4.5_0001089g0070	Nitab4.5_0001196g0130		Nitab4.5_0003185g0080									Nitab4.5_0003884g0100
Nitab4.5_0004585g0050	Nitab4.5_0005164g0030								Nitab4.5_0000857g0050			Nitab4.5_0000214g0040	Nitab4.5_0000749g0100		Nitab4.5_0000041g0390	Nitab4.5_0003080g0110								Nitab4.5_0001553g0030	Nitab4.5_0002355g0030		Nitab4.5_0006925g0020									Nitab4.5_0006000g0050
Nitab4.5_0004902g0030	Nitab4.5_0000352g0050								Nitab4.5_0000944g0100			Nitab4.5_0004848g0110	Nitab4.5_0006098g0030		Nitab4.5_0006319g0010	Nitab4.5_0003503g0020								Nitab4.5_0001553g0050	Nitab4.5_0002365g0050		Nitab4.5_0000208g0410									Nitab4.5_0008582g0010
Nitab4.5_0005114g0020	Nitab4.5_0001688g0070								Nitab4.5_0001385g0140			Nitab4.5_0018555g0010	Nitab4.5_0000024g0130		Nitab4.5_0008175g0010	Nitab4.5_0000761g0110								Nitab4.5_0001704g0020	Nitab4.5_0002605g0020		Nitab4.5_0016580g0020									Nitab4.5_0010343g0010
Nitab4.5_0005412g0020	Nitab4.5_0003906g0010								Nitab4.5_0001651g0040			Nitab4.5_0000073g0030	Nitab4.5_0000332g0190		Nitab4.5_0001925g0140	Nitab4.5_0001190g0010								Nitab4.5_0001818g0040	Nitab4.5_0002732g0010		Nitab4.5_0005717g0010									Nitab4.5_0010583g0030
Nitab4.5_0006326g0010	Nitab4.5_0000539g0080								Nitab4.5_0002427g0060			Nitab4.5_0001866g0010	Nitab4.5_0013753g0010		Nitab4.5_0001802g0130	Nitab4.5_0000014g0090								Nitab4.5_0001875g0010	Nitab4.5_0002732g0030		Nitab4.5_0005776g0040									Nitab4.5_0012349g0030
Nitab4.5_0008390g0030	Nitab4.5_0000091g0300								Nitab4.5_0003103g0040			Nitab4.5_0001163g0120	Nitab4.5_0000013g0350		Nitab4.5_0004728g0070	Nitab4.5_0000040g0130								Nitab4.5_0001980g0060	Nitab4.5_0002732g0040		Nitab4.5_0000261g0280									Nitab4.5_0013146g0050
Nitab4.5_0009910g0020	Nitab4.5_0001242g0140								Nitab4.5_0003213g0010			Nitab4.5_0000012g0320	Nitab4.5_0003098g0090		Nitab4.5_0024848g0010	Nitab4.5_0001077g0060								Nitab4.5_0002605g0010	Nitab4.5_0002983g0010		Nitab4.5_0003362g0010									Nitab4.5_0027851g0010
Nitab4.5_0012015g0040	Nitab4.5_0004673g0030								Nitab4.5_0006370g0020			Nitab4.5_0001946g0020	Nitab4.5_0003718g0010		Nitab4.5_0000022g0300	Nitab4.5_0004300g0240								Nitab4.5_0003313g0020	Nitab4.5_0003106g0040		Nitab4.5_0000270g0180
Nitab4.5_0013129g0010	Nitab4.5_0004969g0050								Nitab4.5_0008368g0010			Nitab4.5_0001781g0200	Nitab4.5_0000063g0220		Nitab4.5_0013692g0010	Nitab4.5_0005472g0030								Nitab4.5_0003553g0090	Nitab4.5_0003180g0070		Nitab4.5_0007958g0020
Nitab4.5_0016557g0010	Nitab4.5_0006022g0010								Nitab4.5_0008548g0020			Nitab4.5_0000022g0210	Nitab4.5_0000132g0490		Nitab4.5_0004777g0030	Nitab4.5_0017147g0010								Nitab4.5_0003725g0040	Nitab4.5_0003426g0010		Nitab4.5_0007306g0010
Nitab4.5_0022627g0010	Nitab4.5_0000631g0020								Nitab4.5_0008663g0020			Nitab4.5_0000547g0010	Nitab4.5_0002626g0010		Nitab4.5_0000192g0200	Nitab4.5_0007278g0030								Nitab4.5_0004585g0050	Nitab4.5_0003671g0050		Nitab4.5_0008001g0030
Nitab4.5_0000334g0110	Nitab4.5_0002750g0110								Nitab4.5_0008773g0010			Nitab4.5_0002342g0170	Nitab4.5_0008822g0020		Nitab4.5_0000593g0080	Nitab4.5_0015220g0010								Nitab4.5_0008390g0030	Nitab4.5_0004353g0020		Nitab4.5_0000515g0030
Nitab4.5_0003642g0040	Nitab4.5_0004360g0050								Nitab4.5_0009737g0010			Nitab4.5_0001996g0080	Nitab4.5_0001381g0010		Nitab4.5_0003408g0140	Nitab4.5_0000573g0100								Nitab4.5_0009910g0020	Nitab4.5_0006402g0010		Nitab4.5_0002162g0080
Nitab4.5_0005865g0020	Nitab4.5_0004625g0020								Nitab4.5_0010037g0010			Nitab4.5_0001756g0150	Nitab4.5_0001951g0010		Nitab4.5_0000446g0060	Nitab4.5_0001933g0090								Nitab4.5_0011622g0010	Nitab4.5_0000198g0140		Nitab4.5_0002208g0100
Nitab4.5_0005865g0030	Nitab4.5_0003086g0080											Nitab4.5_0004838g0020	Nitab4.5_0007319g0010		Nitab4.5_0002540g0040	Nitab4.5_0002036g0020								Nitab4.5_0013129g0010	Nitab4.5_0001503g0010		Nitab4.5_0011952g0010
Nitab4.5_0007061g0110	Nitab4.5_0004941g0040											Nitab4.5_0000443g0220	Nitab4.5_0007482g0020		Nitab4.5_0000581g0170	Nitab4.5_0007366g0020								Nitab4.5_0016557g0010	Nitab4.5_0001503g0020		Nitab4.5_0016574g0010
Nitab4.5_0007378g0020	Nitab4.5_0000960g0090											Nitab4.5_0010372g0020	Nitab4.5_0000738g0040		Nitab4.5_0001898g0080	Nitab4.5_0001308g0120								Nitab4.5_0003642g0040	Nitab4.5_0003106g0020		Nitab4.5_0000360g0010
Nitab4.5_0000380g0160	Nitab4.5_0003434g0090											Nitab4.5_0000892g0170	Nitab4.5_0011129g0030		Nitab4.5_0000223g0070	Nitab4.5_0000575g0170								Nitab4.5_0000380g0160	Nitab4.5_0006086g0040		Nitab4.5_0000040g0350
Nitab4.5_0009507g0010	Nitab4.5_0010962g0010											Nitab4.5_0006586g0020	Nitab4.5_0000164g0010		Nitab4.5_0000377g0130	Nitab4.5_0010206g0020								Nitab4.5_0009507g0010	Nitab4.5_0007378g0030		Nitab4.5_0003950g0050
Nitab4.5_0000208g0300	Nitab4.5_0000131g0260											Nitab4.5_0001288g0220	Nitab4.5_0008369g0010		Nitab4.5_0003628g0020	Nitab4.5_0009408g0020								Nitab4.5_0000274g0160	Nitab4.5_0007378g0060		Nitab4.5_0002902g0030
Nitab4.5_0000274g0160	Nitab4.5_0000994g0050											Nitab4.5_0001616g0110	Nitab4.5_0003588g0050		Nitab4.5_0004280g0120	Nitab4.5_0008284g0010								Nitab4.5_0000564g0060	Nitab4.5_0008680g0020		Nitab4.5_0003130g0080
Nitab4.5_0000564g0060	Nitab4.5_0011937g0010											Nitab4.5_0004530g0060	Nitab4.5_0000091g0300		Nitab4.5_0004287g0060	Nitab4.5_0001134g0070								Nitab4.5_0006318g0010	Nitab4.5_0010766g0010		Nitab4.5_0000855g0030
Nitab4.5_0001536g0010	Nitab4.5_0000075g0030											Nitab4.5_0000402g0170	Nitab4.5_0001242g0140		Nitab4.5_0000901g0020	Nitab4.5_0011320g0030								Nitab4.5_0001918g0040	Nitab4.5_0012885g0010		Nitab4.5_0008961g0010
Nitab4.5_0006318g0010	Nitab4.5_0011255g0010											Nitab4.5_0000402g0180	Nitab4.5_0004673g0030		Nitab4.5_0000440g0010	Nitab4.5_0000013g0420								Nitab4.5_0001239g0100	Nitab4.5_0000657g0010		Nitab4.5_0021719g0010
Nitab4.5_0001239g0100	Nitab4.5_0003417g0010											Nitab4.5_0000402g0200	Nitab4.5_0004969g0050		Nitab4.5_0000672g0080	Nitab4.5_0000037g0240								Nitab4.5_0002265g0050	Nitab4.5_0013947g0020		Nitab4.5_0007966g0010
Nitab4.5_0002265g0050	Nitab4.5_0004059g0070											Nitab4.5_0000625g0080	Nitab4.5_0006022g0010		Nitab4.5_0001047g0070	Nitab4.5_0000098g0060								Nitab4.5_0000350g0260	Nitab4.5_0002926g0020		Nitab4.5_0006683g0070
Nitab4.5_0000350g0260	Nitab4.5_0004430g0110											Nitab4.5_0002772g0010	Nitab4.5_0008422g0020		Nitab4.5_0001599g0170	Nitab4.5_0000256g0270								Nitab4.5_0000414g0010	Nitab4.5_0008766g0010		Nitab4.5_0006540g0010
Nitab4.5_0000414g0010	Nitab4.5_0001401g0110											Nitab4.5_0004541g0060	Nitab4.5_0000631g0020		Nitab4.5_0000559g0130	Nitab4.5_0000303g0180								Nitab4.5_0000625g0040	Nitab4.5_0005502g0010		Nitab4.5_0003337g0030
Nitab4.5_0000625g0040	Nitab4.5_0013034g0030											Nitab4.5_0000286g0050	Nitab4.5_0002750g0110		Nitab4.5_0001163g0150	Nitab4.5_0000383g0280								Nitab4.5_0000901g0090	Nitab4.5_0021524g0020		Nitab4.5_0001170g0220
Nitab4.5_0000901g0090	Nitab4.5_0023530g0010											Nitab4.5_0011739g0010	Nitab4.5_0004360g0050		Nitab4.5_0001256g0080	Nitab4.5_0000922g0070								Nitab4.5_0001648g0030	Nitab4.5_0003280g0030		Nitab4.5_0001230g0040
Nitab4.5_0001648g0030	Nitab4.5_0000232g0110											Nitab4.5_0005164g0030	Nitab4.5_0004625g0020		Nitab4.5_0002906g0080	Nitab4.5_0001094g0170								Nitab4.5_0002456g0060	Nitab4.5_0004259g0030		Nitab4.5_0002815g0110
Nitab4.5_0002456g0060	Nitab4.5_0000274g0040											Nitab4.5_0002079g0020	Nitab4.5_0003086g0080		Nitab4.5_0004551g0030	Nitab4.5_0001231g0010								Nitab4.5_0006214g0010	Nitab4.5_0001187g0030		Nitab4.5_0005392g0070
Nitab4.5_0000914g0180	Nitab4.5_0000564g0230											Nitab4.5_0006576g0030	Nitab4.5_0004941g0040		Nitab4.5_0005224g0050	Nitab4.5_0001337g0060								Nitab4.5_0005119g0030	Nitab4.5_0001344g0020		Nitab4.5_0000885g0030
Nitab4.5_0024190g0010	Nitab4.5_0007744g0010											Nitab4.5_0000337g0210	Nitab4.5_0010846g0010		Nitab4.5_0005352g0010	Nitab4.5_0001478g0180								Nitab4.5_0000914g0180	Nitab4.5_0001922g0050		Nitab4.5_0000894g0070
Nitab4.5_0001239g0160	Nitab4.5_0009739g0050											Nitab4.5_0002710g0070	Nitab4.5_0000960g0090		Nitab4.5_0001442g0010	Nitab4.5_0001486g0010								Nitab4.5_0024190g0010	Nitab4.5_0005504g0030		Nitab4.5_0000115g0330
Nitab4.5_0001239g0170	Nitab4.5_0000386g0250											Nitab4.5_0020128g0010	Nitab4.5_0002865g0120		Nitab4.5_0011083g0020	Nitab4.5_0001552g0050								Nitab4.5_0001239g0160	Nitab4.5_0011483g0010		Nitab4.5_0006270g0010
Nitab4.5_0001239g0200	Nitab4.5_0010392g0010											Nitab4.5_0000616g0070	Nitab4.5_0003434g0090		Nitab4.5_0000081g0200	Nitab4.5_0001560g0010								Nitab4.5_0001239g0170	Nitab4.5_0000442g0250		Nitab4.5_0006755g0010
Nitab4.5_0001239g0210	Nitab4.5_0000207g0310											Nitab4.5_0000629g0010	Nitab4.5_0005076g0030		Nitab4.5_0001081g0060	Nitab4.5_0001668g0150								Nitab4.5_0005999g0010	Nitab4.5_0007424g0020		Nitab4.5_0000297g0270
Nitab4.5_0005999g0010	Nitab4.5_0000207g0280											Nitab4.5_0000105g0380	Nitab4.5_0009945g0010		Nitab4.5_0000496g0130	Nitab4.5_0002027g0220								Nitab4.5_0006969g0030	Nitab4.5_0000207g0360		Nitab4.5_0001252g0010
Nitab4.5_0006969g0030	Nitab4.5_0003771g0030											Nitab4.5_0002399g0030	Nitab4.5_0010962g0010		Nitab4.5_0010993g0020	Nitab4.5_0002315g0090								Nitab4.5_0000136g0240	Nitab4.5_0000781g0040		Nitab4.5_0001223g0040
Nitab4.5_0000136g0240	Nitab4.5_0002156g0020											Nitab4.5_0002902g0140	Nitab4.5_0000605g0280		Nitab4.5_0000040g0110	Nitab4.5_0002890g0060								Nitab4.5_0000723g0220	Nitab4.5_0002090g0040		Nitab4.5_0003122g0050
Nitab4.5_0000723g0220	Nitab4.5_0000676g0240											Nitab4.5_0008037g0060	Nitab4.5_0006225g0050		Nitab4.5_0002297g0020	Nitab4.5_0002956g0010								Nitab4.5_0001525g0020	Nitab4.5_0004553g0030		Nitab4.5_0009917g0010
Nitab4.5_0001525g0020	Nitab4.5_0000850g0010											Nitab4.5_0000707g0270	Nitab4.5_0005583g0040		Nitab4.5_0003100g0030	Nitab4.5_0003011g0040								Nitab4.5_0003313g0010	Nitab4.5_0007380g0040		Nitab4.5_0000327g0130
Nitab4.5_0003313g0010	Nitab4.5_0002428g0040											Nitab4.5_0013820g0010	Nitab4.5_0001831g0080		Nitab4.5_0007705g0010	Nitab4.5_0003649g0010								Nitab4.5_0000585g0150	Nitab4.5_0000742g0110		Nitab4.5_0000327g0140
Nitab4.5_0001599g0050	Nitab4.5_0000706g0050											Nitab4.5_0000989g0080	Nitab4.5_0000312g0330		Nitab4.5_0009777g0010	Nitab4.5_0003699g0020								Nitab4.5_0001599g0050	Nitab4.5_0002700g0120		Nitab4.5_0008240g0010
Nitab4.5_0000238g0090	Nitab4.5_0000173g0120											Nitab4.5_0002354g0010	Nitab4.5_0000558g0010		Nitab4.5_0006719g0080	Nitab4.5_0004051g0050								Nitab4.5_0007882g0010	Nitab4.5_0009867g0010		Nitab4.5_0001454g0170
Nitab4.5_0007882g0010	Nitab4.5_0001163g0060											Nitab4.5_0005620g0060	Nitab4.5_0000860g0060		Nitab4.5_0000085g0010	Nitab4.5_0004322g0030								Nitab4.5_0000916g0100	Nitab4.5_0002441g0010		Nitab4.5_0001145g0020
Nitab4.5_0000916g0100	Nitab4.5_0005665g0050											Nitab4.5_0000976g0030	Nitab4.5_0004059g0070		Nitab4.5_0003838g0090	Nitab4.5_0004390g0020								Nitab4.5_0011081g0020	Nitab4.5_0008962g0050		Nitab4.5_0000679g0100
Nitab4.5_0011081g0020	Nitab4.5_0005788g0010											Nitab4.5_0010249g0010	Nitab4.5_0004430g0100		Nitab4.5_0011752g0010	Nitab4.5_0004465g0100								Nitab4.5_0008568g0040	Nitab4.5_0000152g0180		Nitab4.5_0003202g0060
Nitab4.5_0000163g0110	Nitab4.5_0000805g0080											Nitab4.5_0001562g0100	Nitab4.5_0004430g0110		Nitab4.5_0006167g0020	Nitab4.5_0004937g0020								Nitab4.5_0000163g0110	Nitab4.5_0000188g0090		Nitab4.5_0000143g0160
Nitab4.5_0002487g0070	Nitab4.5_0001735g0110											Nitab4.5_0006683g0130	Nitab4.5_0006367g0030		Nitab4.5_0002857g0010	Nitab4.5_0005239g0020								Nitab4.5_0002487g0070	Nitab4.5_0000864g0040		Nitab4.5_0003626g0040
Nitab4.5_0006867g0010	Nitab4.5_0000161g0280											Nitab4.5_0003574g0140	Nitab4.5_0000791g0100		Nitab4.5_0000460g0040	Nitab4.5_0005271g0040								Nitab4.5_0006867g0010	Nitab4.5_0001303g0110		Nitab4.5_0000795g0070
Nitab4.5_0007779g0010	Nitab4.5_0000007g0340											Nitab4.5_0007109g0010	Nitab4.5_0003373g0050		Nitab4.5_0001292g0050	Nitab4.5_0006358g0080								Nitab4.5_0007779g0010	Nitab4.5_0002337g0010		Nitab4.5_0000190g0030
Nitab4.5_0001952g0140	Nitab4.5_0000143g0450											Nitab4.5_0008144g0010	Nitab4.5_0003868g0020		Nitab4.5_0000567g0030	Nitab4.5_0007853g0040								Nitab4.5_0001952g0140	Nitab4.5_0003290g0030		Nitab4.5_0005389g0010
Nitab4.5_0005206g0010	Nitab4.5_0001198g0190											Nitab4.5_0002310g0100	Nitab4.5_0001401g0110		Nitab4.5_0005323g0010	Nitab4.5_0008981g0030								Nitab4.5_0005206g0010	Nitab4.5_0000697g0070		Nitab4.5_0006842g0010
Nitab4.5_0005038g0020	Nitab4.5_0006935g0010											Nitab4.5_0000332g0050	Nitab4.5_0013034g0030		Nitab4.5_0009500g0010	Nitab4.5_0010414g0030								Nitab4.5_0007922g0040	Nitab4.5_0005597g0040		Nitab4.5_0000185g0300
Nitab4.5_0007922g0040	Nitab4.5_0010222g0030											Nitab4.5_0003378g0080	Nitab4.5_0023530g0010		Nitab4.5_0005382g0010	Nitab4.5_0010557g0040								Nitab4.5_0000021g0570	Nitab4.5_0000337g0070		Nitab4.5_0000751g0170
Nitab4.5_0000021g0570	Nitab4.5_0000027g0190											Nitab4.5_0003157g0030	Nitab4.5_0000232g0110		Nitab4.5_0003289g0010	Nitab4.5_0011093g0030								Nitab4.5_0000179g0010	Nitab4.5_0003251g0080		Nitab4.5_0001409g0100
Nitab4.5_0000179g0010	Nitab4.5_0000068g0020											Nitab4.5_0013167g0010	Nitab4.5_0000151g0350		Nitab4.5_0002052g0010	Nitab4.5_0011745g0020								Nitab4.5_0000301g0030	Nitab4.5_0005120g0100		Nitab4.5_0002598g0090
Nitab4.5_0000301g0030	Nitab4.5_0000287g0290											Nitab4.5_0011633g0010	Nitab4.5_0000274g0040		Nitab4.5_0000482g0240	Nitab4.5_0012555g0050								Nitab4.5_0000556g0240	Nitab4.5_0012789g0020		Nitab4.5_0004743g0100
Nitab4.5_0000556g0240	Nitab4.5_0000307g0160											Nitab4.5_0002719g0120	Nitab4.5_0000564g0230		Nitab4.5_0002684g0190	Nitab4.5_0012586g0020								Nitab4.5_0001762g0080	Nitab4.5_0002380g0030		Nitab4.5_0004983g0010
Nitab4.5_0001762g0080	Nitab4.5_0000404g0200											Nitab4.5_0001425g0100	Nitab4.5_0009739g0050		Nitab4.5_0005897g0040	Nitab4.5_0013629g0010								Nitab4.5_0004528g0020	Nitab4.5_0000978g0100		Nitab4.5_0006117g0040
Nitab4.5_0004528g0020	Nitab4.5_0000523g0030											Nitab4.5_0000838g0140	Nitab4.5_0000386g0250		Nitab4.5_0000201g0020	Nitab4.5_0022411g0010								Nitab4.5_0008679g0010	Nitab4.5_0002466g0010		Nitab4.5_0003228g0050
Nitab4.5_0001521g0010	Nitab4.5_0000680g0010											Nitab4.5_0010514g0020	Nitab4.5_0002436g0090		Nitab4.5_0000694g0090									Nitab4.5_0001159g0090	Nitab4.5_0000495g0040		Nitab4.5_0005943g0020
Nitab4.5_0008679g0010	Nitab4.5_0000682g0040											Nitab4.5_0000258g0120	Nitab4.5_0001386g0020		Nitab4.5_0001793g0130									Nitab4.5_0001576g0010	Nitab4.5_0006054g0010		Nitab4.5_0029224g0010
Nitab4.5_0000565g0060	Nitab4.5_0000723g0230											Nitab4.5_0000565g0070	Nitab4.5_0000207g0280		Nitab4.5_0000319g0420									Nitab4.5_0002529g0060	Nitab4.5_0011519g0020		Nitab4.5_0012494g0040
Nitab4.5_0001159g0090	Nitab4.5_0000790g0050											Nitab4.5_0010843g0010	Nitab4.5_0006486g0030		Nitab4.5_0007063g0070									Nitab4.5_0006220g0040	Nitab4.5_0000321g0220		Nitab4.5_0000170g0060
Nitab4.5_0001576g0010	Nitab4.5_0000794g0070											Nitab4.5_0000649g0180	Nitab4.5_0002156g0020		Nitab4.5_0011765g0020									Nitab4.5_0000980g0330	Nitab4.5_0004743g0040		Nitab4.5_0002280g0010
Nitab4.5_0002529g0060	Nitab4.5_0000806g0090											Nitab4.5_0001051g0160	Nitab4.5_0004381g0030		Nitab4.5_0000935g0260									Nitab4.5_0000167g0130	Nitab4.5_0000749g0100		Nitab4.5_0000729g0130
Nitab4.5_0006220g0040	Nitab4.5_0000851g0020											Nitab4.5_0002709g0090	Nitab4.5_0000676g0240		Nitab4.5_0000102g0030									Nitab4.5_0000976g0270	Nitab4.5_0000332g0190		Nitab4.5_0002275g0010
Nitab4.5_0002279g0030	Nitab4.5_0000883g0170											Nitab4.5_0001730g0120	Nitab4.5_0000706g0050		Nitab4.5_0001881g0020									Nitab4.5_0007669g0010	Nitab4.5_0003033g0050		Nitab4.5_0000315g0200
Nitab4.5_0005313g0010	Nitab4.5_0000883g0180											Nitab4.5_0002787g0040	Nitab4.5_0001026g0010		Nitab4.5_0002196g0060									Nitab4.5_0001494g0140	Nitab4.5_0011677g0020		Nitab4.5_0004480g0050
Nitab4.5_0000976g0270	Nitab4.5_0000986g0020											Nitab4.5_0009278g0010	Nitab4.5_0000033g0440		Nitab4.5_0001265g0010									Nitab4.5_0024059g0010	Nitab4.5_0000681g0010		Nitab4.5_0002022g0010
Nitab4.5_0007669g0010	Nitab4.5_0001182g0050											Nitab4.5_0000386g0050	Nitab4.5_0001034g0100		Nitab4.5_0000733g0040									Nitab4.5_0001957g0020	Nitab4.5_0001608g0010		Nitab4.5_0000864g0110
Nitab4.5_0002006g0060	Nitab4.5_0001290g0070											Nitab4.5_0000583g0180	Nitab4.5_0000563g0180		Nitab4.5_0001453g0050									Nitab4.5_0004400g0020	Nitab4.5_0006586g0030		Nitab4.5_0000864g0130
Nitab4.5_0004400g0020	Nitab4.5_0001410g0070											Nitab4.5_0002840g0070	Nitab4.5_0007060g0030		Nitab4.5_0007303g0040									Nitab4.5_0003234g0140	Nitab4.5_0013753g0010		Nitab4.5_0008011g0010
Nitab4.5_0003234g0140	Nitab4.5_0001569g0140											Nitab4.5_0003967g0010	Nitab4.5_0007541g0020		Nitab4.5_0010763g0030									Nitab4.5_0026658g0010	Nitab4.5_0003098g0090		Nitab4.5_0010567g0020
Nitab4.5_0011198g0010	Nitab4.5_0001643g0110											Nitab4.5_0000080g0290	Nitab4.5_0011040g0030		Nitab4.5_0010853g0040									Nitab4.5_0011198g0010	Nitab4.5_0003718g0010		Nitab4.5_0003030g0070
Nitab4.5_0000710g0040	Nitab4.5_0001643g0120											Nitab4.5_0001449g0020	Nitab4.5_0006016g0010		Nitab4.5_0000681g0020									Nitab4.5_0000710g0040	Nitab4.5_0001371g0040		Nitab4.5_0003381g0020
Nitab4.5_0010078g0010	Nitab4.5_0001693g0080											Nitab4.5_0001843g0070	Nitab4.5_0000173g0120		Nitab4.5_0003827g0030									Nitab4.5_0010078g0010	Nitab4.5_0006286g0070		Nitab4.5_0008297g0010
Nitab4.5_0000214g0040	Nitab4.5_0002313g0020											Nitab4.5_0007734g0010	Nitab4.5_0001163g0060		Nitab4.5_0000786g0190									Nitab4.5_0000214g0040	Nitab4.5_0000063g0220		Nitab4.5_0000408g0160
Nitab4.5_0004848g0110	Nitab4.5_0002328g0040											Nitab4.5_0000903g0070	Nitab4.5_0005788g0010		Nitab4.5_0008115g0010									Nitab4.5_0004848g0110	Nitab4.5_0002626g0010		Nitab4.5_0005083g0010
Nitab4.5_0018555g0010	Nitab4.5_0002400g0010											Nitab4.5_0000999g0020	Nitab4.5_0000161g0280		Nitab4.5_0003844g0020									Nitab4.5_0018555g0010	Nitab4.5_0008822g0020		Nitab4.5_0011709g0020
Nitab4.5_0000073g0030	Nitab4.5_0002429g0080											Nitab4.5_0003120g0030	Nitab4.5_0006622g0080		Nitab4.5_0000194g0220									Nitab4.5_0000073g0030	Nitab4.5_0008822g0030		Nitab4.5_0001696g0140
Nitab4.5_0001866g0010	Nitab4.5_0002436g0020											Nitab4.5_0000207g0090	Nitab4.5_0006348g0030		Nitab4.5_0002093g0020									Nitab4.5_0001866g0010	Nitab4.5_0002815g0020		Nitab4.5_0002151g0010
Nitab4.5_0001163g0120	Nitab4.5_0003031g0010											Nitab4.5_0002383g0040	Nitab4.5_0002538g0060		Nitab4.5_0005286g0060									Nitab4.5_0001163g0120	Nitab4.5_0007319g0010		Nitab4.5_0007561g0010
Nitab4.5_0000012g0320	Nitab4.5_0003118g0030											Nitab4.5_0002026g0020	Nitab4.5_0001198g0190		Nitab4.5_0000310g0220									Nitab4.5_0000012g0320	Nitab4.5_0007482g0020		Nitab4.5_0000505g0120
Nitab4.5_0001946g0020	Nitab4.5_0003261g0010											Nitab4.5_0000110g0020	Nitab4.5_0000935g0020		Nitab4.5_0000440g0170									Nitab4.5_0001946g0020	Nitab4.5_0000008g0240		Nitab4.5_0000639g0190
Nitab4.5_0001781g0200	Nitab4.5_0003564g0020											Nitab4.5_0003281g0080	Nitab4.5_0006935g0010		Nitab4.5_0000728g0130									Nitab4.5_0001781g0200	Nitab4.5_0001561g0030		Nitab4.5_0001634g0060
Nitab4.5_0000022g0210	Nitab4.5_0003634g0030											Nitab4.5_0008189g0010	Nitab4.5_0000850g0040		Nitab4.5_0004123g0020									Nitab4.5_0009933g0030	Nitab4.5_0000515g0170		Nitab4.5_0001643g0100
Nitab4.5_0000547g0010	Nitab4.5_0003887g0030											Nitab4.5_0008239g0010	Nitab4.5_0002521g0040		Nitab4.5_0004123g0030									Nitab4.5_0000939g0060	Nitab4.5_0011129g0030		Nitab4.5_0001861g0020
Nitab4.5_0002342g0170	Nitab4.5_0004012g0010											Nitab4.5_0012894g0010	Nitab4.5_0002714g0020		Nitab4.5_0008228g0030									Nitab4.5_0000547g0010	Nitab4.5_0000164g0010		Nitab4.5_0000297g0050
Nitab4.5_0004838g0020	Nitab4.5_0004023g0020											Nitab4.5_0000532g0070	Nitab4.5_0001288g0030		Nitab4.5_0009160g0010									Nitab4.5_0001220g0080	Nitab4.5_0000091g0300		Nitab4.5_0002458g0030
Nitab4.5_0004281g0070	Nitab4.5_0004164g0040											Nitab4.5_0005249g0030	Nitab4.5_0000027g0190		Nitab4.5_0000096g0270									Nitab4.5_0001803g0050	Nitab4.5_0001242g0140		Nitab4.5_0005428g0060
Nitab4.5_0001244g0080	Nitab4.5_0004164g0050											Nitab4.5_0001842g0110	Nitab4.5_0000068g0020		Nitab4.5_0001409g0090									Nitab4.5_0001996g0080	Nitab4.5_0004969g0050		Nitab4.5_0003694g0060
Nitab4.5_0000443g0220	Nitab4.5_0004490g0020											Nitab4.5_0007287g0050	Nitab4.5_0000086g0290		Nitab4.5_0002697g0070									Nitab4.5_0004838g0020	Nitab4.5_0006022g0010		Nitab4.5_0009934g0020
Nitab4.5_0010372g0020	Nitab4.5_0005105g0020											Nitab4.5_0000025g0260	Nitab4.5_0000103g0030		Nitab4.5_0000262g0180									Nitab4.5_0006709g0010	Nitab4.5_0000631g0020		Nitab4.5_0000083g0180
Nitab4.5_0000159g0240	Nitab4.5_0005371g0020											Nitab4.5_0007566g0010	Nitab4.5_0000173g0310		Nitab4.5_0000632g0080									Nitab4.5_0013157g0010	Nitab4.5_0004360g0050		Nitab4.5_0000077g0100
Nitab4.5_0000468g0010	Nitab4.5_0005925g0010											Nitab4.5_0000390g0030	Nitab4.5_0000287g0290		Nitab4.5_0001383g0180									Nitab4.5_0000443g0220	Nitab4.5_0004625g0020		Nitab4.5_0001209g0050
Nitab4.5_0000892g0170	Nitab4.5_0006121g0020											Nitab4.5_0001264g0060	Nitab4.5_0000307g0160		Nitab4.5_0009489g0010									Nitab4.5_0010372g0020	Nitab4.5_0003086g0080		Nitab4.5_0001476g0070
Nitab4.5_0001288g0220	Nitab4.5_0007257g0030											Nitab4.5_0001461g0070	Nitab4.5_0000523g0030		Nitab4.5_0000072g0600									Nitab4.5_0000159g0240	Nitab4.5_0003434g0090		Nitab4.5_0000113g0160
Nitab4.5_0004824g0040	Nitab4.5_0008401g0010											Nitab4.5_0002188g0020	Nitab4.5_0000682g0040		Nitab4.5_0001383g0170									Nitab4.5_0000892g0170	Nitab4.5_0009945g0010		Nitab4.5_0002124g0010
Nitab4.5_0006586g0020	Nitab4.5_0008401g0020											Nitab4.5_0004156g0010	Nitab4.5_0000723g0230		Nitab4.5_0001780g0050									Nitab4.5_0001288g0220	Nitab4.5_0010962g0010		Nitab4.5_0003857g0040
Nitab4.5_0006281g0010	Nitab4.5_0010261g0040											Nitab4.5_0006052g0010	Nitab4.5_0000794g0070		Nitab4.5_0014760g0010									Nitab4.5_0004855g0030	Nitab4.5_0000605g0280		Nitab4.5_0001387g0020
Nitab4.5_0000021g0720	Nitab4.5_0010707g0010											Nitab4.5_0006692g0010	Nitab4.5_0000851g0020		Nitab4.5_0000475g0010									Nitab4.5_0006586g0020	Nitab4.5_0006225g0050		Nitab4.5_0000555g0150
Nitab4.5_0004530g0060	Nitab4.5_0010991g0040											Nitab4.5_0000946g0010	Nitab4.5_0000883g0170		Nitab4.5_0010616g0040									Nitab4.5_0000684g0160	Nitab4.5_0001831g0080		Nitab4.5_0001585g0080
Nitab4.5_0000402g0180	Nitab4.5_0012408g0020											Nitab4.5_0001857g0030	Nitab4.5_0000883g0180		Nitab4.5_0000457g0400									Nitab4.5_0007062g0050	Nitab4.5_0004654g0030		Nitab4.5_0002369g0010
Nitab4.5_0000402g0200	Nitab4.5_0013455g0030											Nitab4.5_0020114g0010	Nitab4.5_0001182g0050		Nitab4.5_0009733g0010									Nitab4.5_0001616g0110	Nitab4.5_0002100g0140		Nitab4.5_0020608g0010
Nitab4.5_0000402g0220	Nitab4.5_0015407g0010											Nitab4.5_0000256g0030	Nitab4.5_0001410g0070		Nitab4.5_0001099g0050									Nitab4.5_0005528g0100	Nitab4.5_0000109g0350		Nitab4.5_0000084g0480
Nitab4.5_0000625g0080	Nitab4.5_0015894g0010											Nitab4.5_0000343g0060	Nitab4.5_0001569g0140		Nitab4.5_0000965g0070									Nitab4.5_0000021g0720	Nitab4.5_0000312g0300		Nitab4.5_0002072g0030
Nitab4.5_0002772g0010	Nitab4.5_0000617g0030											Nitab4.5_0000883g0190	Nitab4.5_0001643g0120		Nitab4.5_0005658g0020									Nitab4.5_0004530g0060	Nitab4.5_0000312g0320		Nitab4.5_0001409g0180
Nitab4.5_0007809g0020	Nitab4.5_0001730g0060											Nitab4.5_0000990g0040	Nitab4.5_0001693g0070		Nitab4.5_0000669g0080									Nitab4.5_0000402g0170	Nitab4.5_0000312g0330		Nitab4.5_0000036g0450
Nitab4.5_0005199g0060	Nitab4.5_0000318g0050											Nitab4.5_0001036g0110	Nitab4.5_0001693g0080		Nitab4.5_0000273g0180									Nitab4.5_0000402g0180	Nitab4.5_0000312g0340		Nitab4.5_0000057g0200
Nitab4.5_0000337g0210	Nitab4.5_0003635g0030											Nitab4.5_0001145g0040	Nitab4.5_0001815g0010		Nitab4.5_0000631g0070									Nitab4.5_0000402g0200	Nitab4.5_0000558g0010		Nitab4.5_0000072g0260
Nitab4.5_0002710g0070	Nitab4.5_0002439g0100											Nitab4.5_0001488g0020	Nitab4.5_0002313g0020		Nitab4.5_0000631g0110									Nitab4.5_0000402g0220	Nitab4.5_0000860g0060		Nitab4.5_0000125g0360
Nitab4.5_0000495g0220	Nitab4.5_0006889g0010											Nitab4.5_0002027g0030	Nitab4.5_0002400g0010		Nitab4.5_0012091g0020									Nitab4.5_0000625g0080	Nitab4.5_0002588g0020		Nitab4.5_0000242g0110
Nitab4.5_0020128g0010	Nitab4.5_0008919g0020											Nitab4.5_0002027g0070	Nitab4.5_0002429g0080		Nitab4.5_0000007g0230									Nitab4.5_0002772g0010	Nitab4.5_0003417g0010		Nitab4.5_0000437g0160
Nitab4.5_0000616g0070	Nitab4.5_0015477g0010											Nitab4.5_0004937g0060	Nitab4.5_0002436g0020		Nitab4.5_0011231g0010									Nitab4.5_0000008g0270	Nitab4.5_0003763g0030		Nitab4.5_0000452g0070
Nitab4.5_0000629g0010	Nitab4.5_0008972g0020											Nitab4.5_0001693g0090	Nitab4.5_0002975g0080		Nitab4.5_0007254g0050									Nitab4.5_0000073g0350	Nitab4.5_0003983g0060		Nitab4.5_0000468g0090
Nitab4.5_0000105g0380	Nitab4.5_0014533g0010											Nitab4.5_0001014g0030	Nitab4.5_0003031g0010		Nitab4.5_0000031g0370									Nitab4.5_0000278g0030	Nitab4.5_0004059g0070		Nitab4.5_0000818g0010
Nitab4.5_0002399g0030	Nitab4.5_0012389g0010											Nitab4.5_0006650g0020	Nitab4.5_0003118g0030		Nitab4.5_0000884g0010									Nitab4.5_0000604g0110	Nitab4.5_0004430g0090		Nitab4.5_0000855g0160
Nitab4.5_0002902g0140	Nitab4.5_0002224g0060											Nitab4.5_0001119g0110	Nitab4.5_0003261g0010		Nitab4.5_0000068g0430									Nitab4.5_0000640g0170	Nitab4.5_0004430g0100		Nitab4.5_0001097g0100
Nitab4.5_0007444g0010	Nitab4.5_0001071g0090											Nitab4.5_0001439g0050	Nitab4.5_0003634g0030		Nitab4.5_0005755g0020									Nitab4.5_0000744g0050	Nitab4.5_0004430g0110		Nitab4.5_0001151g0010
Nitab4.5_0008037g0060	Nitab4.5_0008036g0010											Nitab4.5_0000569g0160	Nitab4.5_0003887g0030		Nitab4.5_0009182g0010									Nitab4.5_0002443g0040	Nitab4.5_0000694g0150		Nitab4.5_0001151g0020
Nitab4.5_0000707g0270	Nitab4.5_0000130g0090											Nitab4.5_0003035g0030	Nitab4.5_0004012g0010		Nitab4.5_0014046g0010									Nitab4.5_0004920g0030	Nitab4.5_0000791g0100		Nitab4.5_0001164g0190
Nitab4.5_0000244g0130	Nitab4.5_0017332g0010											Nitab4.5_0011813g0010	Nitab4.5_0004126g0030		Nitab4.5_0000119g0360									Nitab4.5_0007994g0010	Nitab4.5_0003373g0050		Nitab4.5_0001192g0020
Nitab4.5_0001522g0030	Nitab4.5_0000906g0010											Nitab4.5_0010479g0010	Nitab4.5_0004164g0040		Nitab4.5_0000308g0390									Nitab4.5_0029531g0010	Nitab4.5_0001401g0110		Nitab4.5_0001521g0050
Nitab4.5_0002912g0030	Nitab4.5_0011161g0010											Nitab4.5_0002853g0060	Nitab4.5_0004164g0050		Nitab4.5_0002169g0040									Nitab4.5_0004541g0060	Nitab4.5_0013034g0030		Nitab4.5_0001858g0020
Nitab4.5_0004114g0060	Nitab4.5_0000383g0260											Nitab4.5_0000016g0120	Nitab4.5_0004490g0020		Nitab4.5_0000318g0110									Nitab4.5_0000278g0010	Nitab4.5_0005452g0030		Nitab4.5_0002093g0010
Nitab4.5_0000057g0010	Nitab4.5_0002252g0080											Nitab4.5_0000117g0050	Nitab4.5_0004646g0010		Nitab4.5_0001423g0140									Nitab4.5_0003981g0080	Nitab4.5_0000321g0090		Nitab4.5_0002252g0100
Nitab4.5_0000949g0020	Nitab4.5_0000014g0070											Nitab4.5_0000957g0130	Nitab4.5_0004840g0010		Nitab4.5_0002848g0030									Nitab4.5_0000286g0050	Nitab4.5_0023530g0010		Nitab4.5_0002484g0080
Nitab4.5_0000976g0030	Nitab4.5_0000040g0250											Nitab4.5_0002547g0010	Nitab4.5_0004977g0070		Nitab4.5_0009790g0010									Nitab4.5_0000286g0060	Nitab4.5_0000232g0110		Nitab4.5_0002575g0070
Nitab4.5_0010249g0010	Nitab4.5_0000121g0140											Nitab4.5_0010151g0030	Nitab4.5_0005105g0020		Nitab4.5_0001702g0210									Nitab4.5_0003244g0020	Nitab4.5_0000151g0350		Nitab4.5_0002813g0060
Nitab4.5_0006683g0130	Nitab4.5_0000605g0210											Nitab4.5_0003005g0010	Nitab4.5_0005472g0090		Nitab4.5_0000142g0340									Nitab4.5_0011739g0010	Nitab4.5_0000837g0090		Nitab4.5_0003082g0020
Nitab4.5_0004482g0070	Nitab4.5_0001923g0010											Nitab4.5_0007133g0040	Nitab4.5_0006121g0020		Nitab4.5_0001099g0060									Nitab4.5_0000288g0110	Nitab4.5_0000274g0040		Nitab4.5_0003201g0010
Nitab4.5_0003574g0140	Nitab4.5_0003995g0040											Nitab4.5_0001901g0010	Nitab4.5_0007257g0030		Nitab4.5_0000296g0110									Nitab4.5_0003247g0010	Nitab4.5_0000564g0230		Nitab4.5_0003537g0010
Nitab4.5_0001621g0030	Nitab4.5_0007189g0040											Nitab4.5_0009702g0010	Nitab4.5_0008401g0020		Nitab4.5_0000908g0110									Nitab4.5_0005164g0030	Nitab4.5_0007744g0010		Nitab4.5_0003721g0040
Nitab4.5_0000332g0050	Nitab4.5_0011320g0010											Nitab4.5_0013195g0010	Nitab4.5_0009901g0040		Nitab4.5_0005090g0030									Nitab4.5_0001519g0210	Nitab4.5_0009739g0050		Nitab4.5_0003725g0030
Nitab4.5_0003378g0080	Nitab4.5_0000673g0090											Nitab4.5_0000062g0030	Nitab4.5_0010091g0010		Nitab4.5_0005615g0010									Nitab4.5_0002079g0020	Nitab4.5_0002436g0090		Nitab4.5_0004092g0010
Nitab4.5_0003157g0030	Nitab4.5_0003063g0040											Nitab4.5_0000342g0080	Nitab4.5_0010261g0040		Nitab4.5_0006234g0010									Nitab4.5_0001485g0200	Nitab4.5_0000207g0310		Nitab4.5_0004152g0010
Nitab4.5_0013167g0010	Nitab4.5_0003668g0020											Nitab4.5_0000118g0080	Nitab4.5_0010707g0010		Nitab4.5_0000707g0200									Nitab4.5_0001688g0070	Nitab4.5_0002543g0120		Nitab4.5_0004776g0090
Nitab4.5_0011633g0010	Nitab4.5_0010135g0010											Nitab4.5_0002278g0080	Nitab4.5_0010991g0040		Nitab4.5_0008441g0030									Nitab4.5_0003906g0010	Nitab4.5_0000569g0100		Nitab4.5_0005172g0010
Nitab4.5_0001425g0100	Nitab4.5_0010316g0010											Nitab4.5_0006052g0040	Nitab4.5_0012408g0020		Nitab4.5_0000285g0020									Nitab4.5_0005199g0060	Nitab4.5_0003643g0040		Nitab4.5_0005336g0010
Nitab4.5_0000101g0230	Nitab4.5_0006641g0010											Nitab4.5_0008809g0010	Nitab4.5_0013330g0010		Nitab4.5_0003960g0020									Nitab4.5_0019776g0010	Nitab4.5_0000495g0180		Nitab4.5_0006055g0060
Nitab4.5_0000258g0120	Nitab4.5_0004859g0050											Nitab4.5_0010215g0010	Nitab4.5_0013378g0020		Nitab4.5_0000016g0160									Nitab4.5_0000337g0210	Nitab4.5_0002967g0030		Nitab4.5_0006122g0030
Nitab4.5_0000565g0070	Nitab4.5_0000458g0050											Nitab4.5_0010289g0010	Nitab4.5_0013455g0030		Nitab4.5_0003171g0010									Nitab4.5_0002710g0070	Nitab4.5_0008332g0040		Nitab4.5_0006182g0010
Nitab4.5_0000838g0140	Nitab4.5_0003418g0050											Nitab4.5_0012256g0020	Nitab4.5_0015407g0010		Nitab4.5_0000254g0250									Nitab4.5_0001581g0070	Nitab4.5_0006486g0030		Nitab4.5_0006318g0040
Nitab4.5_0010514g0020	Nitab4.5_0000642g0310											Nitab4.5_0004937g0030	Nitab4.5_0015894g0010		Nitab4.5_0001615g0010									Nitab4.5_0007062g0020	Nitab4.5_0000257g0270		Nitab4.5_0006788g0020
Nitab4.5_0001465g0060	Nitab4.5_0001955g0170											Nitab4.5_0000446g0210	Nitab4.5_0000617g0030		Nitab4.5_0002975g0030									Nitab4.5_0020128g0010	Nitab4.5_0002156g0020		Nitab4.5_0007121g0010
Nitab4.5_0000649g0180	Nitab4.5_0005563g0010											Nitab4.5_0001192g0070	Nitab4.5_0003468g0020		Nitab4.5_0000034g0010									Nitab4.5_0000616g0070	Nitab4.5_0000241g0010		Nitab4.5_0007212g0010
Nitab4.5_0000486g0160	Nitab4.5_0002854g0070											Nitab4.5_0001297g0040	Nitab4.5_0000316g0350		Nitab4.5_0001614g0150									Nitab4.5_0000629g0010	Nitab4.5_0003814g0020		Nitab4.5_0007767g0020
Nitab4.5_0001051g0160	Nitab4.5_0001574g0130											Nitab4.5_0004677g0010	Nitab4.5_0001730g0060		Nitab4.5_0005506g0010									Nitab4.5_0000105g0380	Nitab4.5_0006058g0010		Nitab4.5_0007803g0020
Nitab4.5_0001425g0070	Nitab4.5_0000073g0110											Nitab4.5_0011492g0030	Nitab4.5_0000318g0050		Nitab4.5_0013411g0010									Nitab4.5_0002902g0140	Nitab4.5_0000676g0240		Nitab4.5_0007986g0010
Nitab4.5_0002709g0090	Nitab4.5_0008125g0010											Nitab4.5_0001454g0060	Nitab4.5_0002107g0060		Nitab4.5_0006134g0050									Nitab4.5_0003572g0020	Nitab4.5_0000850g0010		Nitab4.5_0008526g0010
Nitab4.5_0002930g0030	Nitab4.5_0008913g0010											Nitab4.5_0011117g0020	Nitab4.5_0002439g0100		Nitab4.5_0006950g0010									Nitab4.5_0008037g0060	Nitab4.5_0002428g0040		Nitab4.5_0009995g0010
Nitab4.5_0001356g0080	Nitab4.5_0000573g0040											Nitab4.5_0026868g0020	Nitab4.5_0006889g0010		Nitab4.5_0000116g0320									Nitab4.5_0003305g0010	Nitab4.5_0000706g0050		Nitab4.5_0010254g0050
Nitab4.5_0009278g0010	Nitab4.5_0003806g0010											Nitab4.5_0000264g0190	Nitab4.5_0008919g0020		Nitab4.5_0004400g0030									Nitab4.5_0000707g0270	Nitab4.5_0001026g0010		Nitab4.5_0010305g0010
Nitab4.5_0000386g0050	Nitab4.5_0006860g0020											Nitab4.5_0006202g0040	Nitab4.5_0013459g0010		Nitab4.5_0007254g0040									Nitab4.5_0013820g0010	Nitab4.5_0001034g0100		Nitab4.5_0010389g0020
Nitab4.5_0000583g0180	Nitab4.5_0003449g0090											Nitab4.5_0002266g0020	Nitab4.5_0000783g0240		Nitab4.5_0000283g0380									Nitab4.5_0000244g0130	Nitab4.5_0000563g0180		Nitab4.5_0013642g0020
Nitab4.5_0002840g0070	Nitab4.5_0003347g0060											Nitab4.5_0007501g0030	Nitab4.5_0001244g0160		Nitab4.5_0008314g0060									Nitab4.5_0002912g0030	Nitab4.5_0007060g0030		Nitab4.5_0003313g0050
Nitab4.5_0003967g0010	Nitab4.5_0003668g0100											Nitab4.5_0012525g0010	Nitab4.5_0015477g0010		Nitab4.5_0000174g0230									Nitab4.5_0013324g0010	Nitab4.5_0007541g0020		Nitab4.5_0007754g0030
Nitab4.5_0000080g0290	Nitab4.5_0000403g0010											Nitab4.5_0000836g0120	Nitab4.5_0008972g0020		Nitab4.5_0000797g0120									Nitab4.5_0000057g0010	Nitab4.5_0006016g0010		Nitab4.5_0010971g0010
Nitab4.5_0001449g0020	Nitab4.5_0001161g0010											Nitab4.5_0000588g0250	Nitab4.5_0008316g0020		Nitab4.5_0000961g0040									Nitab4.5_0000491g0080	Nitab4.5_0000173g0120		Nitab4.5_0006244g0030
Nitab4.5_0001843g0070	Nitab4.5_0000185g0110											Nitab4.5_0000723g0150	Nitab4.5_0014533g0010		Nitab4.5_0003298g0060									Nitab4.5_0000949g0020	Nitab4.5_0001163g0060		Nitab4.5_0002285g0030
Nitab4.5_0000903g0070	Nitab4.5_0000600g0050											Nitab4.5_0000054g0220	Nitab4.5_0000247g0050		Nitab4.5_0007825g0010									Nitab4.5_0000976g0030	Nitab4.5_0005665g0050		Nitab4.5_0004987g0040
Nitab4.5_0000999g0020	Nitab4.5_0000734g0070											Nitab4.5_0007401g0010	Nitab4.5_0000195g0050		Nitab4.5_0001531g0020									Nitab4.5_0010249g0010	Nitab4.5_0005788g0010		Nitab4.5_0000610g0270
Nitab4.5_0000207g0090	Nitab4.5_0001088g0130											Nitab4.5_0000200g0060	Nitab4.5_0003886g0110		Nitab4.5_0002462g0020									Nitab4.5_0001562g0100	Nitab4.5_0005135g0030		Nitab4.5_0003179g0060
Nitab4.5_0002383g0040	Nitab4.5_0001731g0020											Nitab4.5_0000200g0080	Nitab4.5_0002224g0060		Nitab4.5_0006892g0030									Nitab4.5_0006683g0130	Nitab4.5_0000161g0280		Nitab4.5_0009193g0020
Nitab4.5_0000016g0120	Nitab4.5_0002211g0060											Nitab4.5_0007575g0010	Nitab4.5_0001071g0090		Nitab4.5_0006190g0010									Nitab4.5_0000876g0130	Nitab4.5_0006622g0080		Nitab4.5_0001000g0160
Nitab4.5_0000062g0030	Nitab4.5_0002236g0020											Nitab4.5_0007575g0020	Nitab4.5_0001299g0080		Nitab4.5_0004026g0020									Nitab4.5_0000876g0140	Nitab4.5_0001146g0060		Nitab4.5_0002230g0020
Nitab4.5_0000110g0020	Nitab4.5_0002236g0040											Nitab4.5_0002915g0080	Nitab4.5_0002315g0170		Nitab4.5_0007322g0010									Nitab4.5_0002673g0040	Nitab4.5_0004288g0010		Nitab4.5_0000859g0200
Nitab4.5_0000117g0050	Nitab4.5_0007739g0010											Nitab4.5_0000069g0590	Nitab4.5_0008036g0010		Nitab4.5_0000463g0080									Nitab4.5_0002673g0050	Nitab4.5_0004288g0030		Nitab4.5_0004054g0020
Nitab4.5_0000118g0080	Nitab4.5_0000600g0080											Nitab4.5_0003304g0010	Nitab4.5_0001336g0060		Nitab4.5_0008037g0020									Nitab4.5_0005583g0030	Nitab4.5_0009018g0020		Nitab4.5_0005011g0020
Nitab4.5_0000156g0090	Nitab4.5_0000586g0010											Nitab4.5_0002642g0100	Nitab4.5_0000906g0010		Nitab4.5_0004070g0080									Nitab4.5_0005583g0040	Nitab4.5_0001653g0080		Nitab4.5_0007686g0010
Nitab4.5_0000188g0200	Nitab4.5_0000512g0230											Nitab4.5_0002824g0090	Nitab4.5_0000383g0260		Nitab4.5_0004677g0040									Nitab4.5_0000102g0450	Nitab4.5_0000916g0060		Nitab4.5_0000267g0110
Nitab4.5_0000256g0030	Nitab4.5_0002526g0070											Nitab4.5_0000769g0110	Nitab4.5_0002252g0080		Nitab4.5_0000714g0050									Nitab4.5_0009383g0010	Nitab4.5_0006348g0030		Nitab4.5_0001485g0120
Nitab4.5_0000256g0050	Nitab4.5_0003868g0010											Nitab4.5_0001019g0080	Nitab4.5_0000014g0070		Nitab4.5_0002887g0080									Nitab4.5_0003574g0140	Nitab4.5_0006629g0010		Nitab4.5_0006094g0010
Nitab4.5_0000309g0020	Nitab4.5_0000421g0100											Nitab4.5_0011990g0010	Nitab4.5_0000121g0140		Nitab4.5_0003858g0020									Nitab4.5_0005990g0040	Nitab4.5_0004679g0080		Nitab4.5_0009401g0020
Nitab4.5_0000343g0060	Nitab4.5_0006479g0010											Nitab4.5_0001961g0040	Nitab4.5_0000605g0210		Nitab4.5_0010072g0010									Nitab4.5_0002310g0100	Nitab4.5_0001198g0190		Nitab4.5_0004476g0050
Nitab4.5_0000390g0030	Nitab4.5_0000058g0020											Nitab4.5_0004610g0020	Nitab4.5_0000761g0090		Nitab4.5_0002656g0060									Nitab4.5_0000332g0050	Nitab4.5_0000935g0020		Nitab4.5_0000329g0220
Nitab4.5_0000390g0100	Nitab4.5_0001817g0020											Nitab4.5_0009771g0010	Nitab4.5_0001923g0010		Nitab4.5_0000208g0410									Nitab4.5_0003378g0080	Nitab4.5_0000850g0040		Nitab4.5_0001819g0100
Nitab4.5_0000470g0190	Nitab4.5_0008890g0010											Nitab4.5_0000732g0120	Nitab4.5_0003995g0040		Nitab4.5_0016580g0020									Nitab4.5_0000075g0010	Nitab4.5_0001564g0070		Nitab4.5_0001387g0010
Nitab4.5_0000532g0070	Nitab4.5_0000355g0250											Nitab4.5_0000732g0130	Nitab4.5_0004286g0050		Nitab4.5_0001323g0150									Nitab4.5_0003157g0030	Nitab4.5_0001883g0010		Nitab4.5_0000618g0040
Nitab4.5_0000569g0160	Nitab4.5_0000601g0120											Nitab4.5_0001251g0100	Nitab4.5_0000673g0090		Nitab4.5_0002045g0150									Nitab4.5_0013167g0010	Nitab4.5_0001288g0030		Nitab4.5_0003498g0040
Nitab4.5_0000919g0090	Nitab4.5_0003039g0040											Nitab4.5_0002710g0030	Nitab4.5_0003063g0040		Nitab4.5_0002211g0130									Nitab4.5_0011633g0010	Nitab4.5_0000027g0190		Nitab4.5_0000874g0020
Nitab4.5_0000946g0010	Nitab4.5_0012385g0010											Nitab4.5_0002046g0140	Nitab4.5_0003668g0020		Nitab4.5_0005717g0010									Nitab4.5_0010643g0040	Nitab4.5_0000068g0020		Nitab4.5_0000587g0070
Nitab4.5_0000957g0130	Nitab4.5_0012887g0010											Nitab4.5_0002450g0150	Nitab4.5_0007503g0010		Nitab4.5_0006299g0010									Nitab4.5_0004537g0020	Nitab4.5_0000086g0290		Nitab4.5_0009327g0020
Nitab4.5_0000970g0040	Nitab4.5_0026202g0010											Nitab4.5_0001437g0070	Nitab4.5_0003318g0130		Nitab4.5_0004524g0010									Nitab4.5_0001425g0100	Nitab4.5_0000103g0030		Nitab4.5_0010551g0010
Nitab4.5_0000990g0040	Nitab4.5_0004682g0020											Nitab4.5_0005622g0070	Nitab4.5_0000498g0060		Nitab4.5_0003098g0080									Nitab4.5_0000258g0120	Nitab4.5_0000253g0090		Nitab4.5_0000272g0030
Nitab4.5_0001014g0030	Nitab4.5_0000470g0230											Nitab4.5_0008316g0010	Nitab4.5_0010135g0010		Nitab4.5_0003901g0030									Nitab4.5_0000565g0070	Nitab4.5_0000307g0160		Nitab4.5_0008249g0040
Nitab4.5_0001036g0110	Nitab4.5_0000600g0060											Nitab4.5_0000488g0010	Nitab4.5_0000082g0140		Nitab4.5_0002160g0100									Nitab4.5_0000838g0140	Nitab4.5_0000381g0330		Nitab4.5_0000461g0190
Nitab4.5_0001119g0110	Nitab4.5_0001088g0170											Nitab4.5_0002733g0020	Nitab4.5_0006641g0010		Nitab4.5_0011760g0010									Nitab4.5_0010514g0020	Nitab4.5_0000523g0030		Nitab4.5_0003876g0010
Nitab4.5_0001295g0020	Nitab4.5_0003571g0020											Nitab4.5_0009614g0010	Nitab4.5_0009926g0010		Nitab4.5_0000182g0050									Nitab4.5_0001176g0120	Nitab4.5_0000680g0010		Nitab4.5_0004275g0010
Nitab4.5_0001377g0040	Nitab4.5_0007739g0040											Nitab4.5_0001509g0060	Nitab4.5_0000025g0180		Nitab4.5_0007958g0020									Nitab4.5_0002556g0060	Nitab4.5_0000682g0040		Nitab4.5_0006169g0030
Nitab4.5_0001439g0050	Nitab4.5_0010294g0030											Nitab4.5_0005545g0030	Nitab4.5_0004859g0050		Nitab4.5_0007306g0010									Nitab4.5_0001051g0160	Nitab4.5_0000723g0230		Nitab4.5_0009839g0020
Nitab4.5_0001461g0070	Nitab4.5_0004342g0120											Nitab4.5_0001833g0020	Nitab4.5_0000758g0040		Nitab4.5_0008001g0030									Nitab4.5_0002787g0040	Nitab4.5_0000851g0020		Nitab4.5_0000006g0450
Nitab4.5_0001488g0020	Nitab4.5_0001886g0060											Nitab4.5_0005163g0070	Nitab4.5_0001315g0170		Nitab4.5_0000515g0030									Nitab4.5_0009278g0010	Nitab4.5_0000883g0170		Nitab4.5_0000012g0010
Nitab4.5_0001693g0090	Nitab4.5_0012899g0010											Nitab4.5_0000291g0050	Nitab4.5_0000122g0060		Nitab4.5_0001364g0020									Nitab4.5_0000386g0050	Nitab4.5_0000883g0180		Nitab4.5_0000031g0350
Nitab4.5_0001693g0100	Nitab4.5_0000486g0010											Nitab4.5_0002335g0020	Nitab4.5_0001955g0170		Nitab4.5_0002162g0080									Nitab4.5_0000583g0180	Nitab4.5_0000986g0020		Nitab4.5_0000037g0370
Nitab4.5_0001842g0110	Nitab4.5_0005506g0020											Nitab4.5_0000024g0160	Nitab4.5_0004359g0050		Nitab4.5_0002208g0100									Nitab4.5_0003967g0010	Nitab4.5_0001182g0050		Nitab4.5_0000207g0170
Nitab4.5_0001857g0030	Nitab4.5_0001035g0010											Nitab4.5_0001128g0070	Nitab4.5_0001574g0130		Nitab4.5_0011952g0010									Nitab4.5_0000080g0290	Nitab4.5_0001290g0070		Nitab4.5_0000324g0240
Nitab4.5_0001901g0010	Nitab4.5_0002377g0030											Nitab4.5_0000108g0290	Nitab4.5_0003263g0040		Nitab4.5_0003757g0060									Nitab4.5_0001449g0020	Nitab4.5_0001569g0140		Nitab4.5_0000363g0160
Nitab4.5_0002027g0030	Nitab4.5_0005483g0010											Nitab4.5_0001014g0060	Nitab4.5_0000024g0140		Nitab4.5_0000040g0350									Nitab4.5_0001843g0070	Nitab4.5_0001693g0070		Nitab4.5_0000366g0010
Nitab4.5_0002027g0070	Nitab4.5_0000117g0160											Nitab4.5_0001967g0020	Nitab4.5_0000073g0110		Nitab4.5_0003950g0040									Nitab4.5_0008439g0030	Nitab4.5_0001693g0080		Nitab4.5_0000452g0020
Nitab4.5_0002188g0020	Nitab4.5_0000005g0110											Nitab4.5_0002157g0080	Nitab4.5_0001488g0100		Nitab4.5_0003950g0050									Nitab4.5_0009466g0020	Nitab4.5_0001815g0010		Nitab4.5_0000512g0070
Nitab4.5_0002278g0080	Nitab4.5_0000568g0030											Nitab4.5_0000039g0180	Nitab4.5_0001028g0040		Nitab4.5_0000855g0030									Nitab4.5_0002864g0020	Nitab4.5_0002313g0020		Nitab4.5_0000662g0060
Nitab4.5_0002547g0010	Nitab4.5_0004599g0080											Nitab4.5_0000021g0200	Nitab4.5_0000335g0170		Nitab4.5_0003292g0020									Nitab4.5_0000903g0070	Nitab4.5_0002328g0040		Nitab4.5_0000687g0100
Nitab4.5_0003005g0010	Nitab4.5_0012890g0020											Nitab4.5_0014534g0010	Nitab4.5_0001581g0080		Nitab4.5_0008961g0010									Nitab4.5_0000999g0020	Nitab4.5_0002400g0010		Nitab4.5_0000715g0170
Nitab4.5_0003281g0080	Nitab4.5_0000512g0170											Nitab4.5_0000283g0070	Nitab4.5_0001323g0130		Nitab4.5_0021719g0010									Nitab4.5_0001796g0040	Nitab4.5_0002429g0080		Nitab4.5_0001197g0010
Nitab4.5_0004156g0010	Nitab4.5_0002526g0030											Nitab4.5_0003951g0020	Nitab4.5_0006860g0020		Nitab4.5_0004756g0010									Nitab4.5_0002383g0040	Nitab4.5_0002436g0020		Nitab4.5_0001197g0020
Nitab4.5_0004937g0060	Nitab4.5_0000706g0040											Nitab4.5_0008316g0030	Nitab4.5_0000132g0250		Nitab4.5_0007966g0010									Nitab4.5_0002026g0020	Nitab4.5_0002975g0080		Nitab4.5_0001610g0030
Nitab4.5_0005117g0010	Nitab4.5_0003822g0010											Nitab4.5_0000204g0020	Nitab4.5_0000122g0120		Nitab4.5_0003469g0060									Nitab4.5_0000016g0120	Nitab4.5_0003031g0010		Nitab4.5_0002392g0100
Nitab4.5_0005249g0030	Nitab4.5_0011433g0020											Nitab4.5_0011341g0020	Nitab4.5_0003347g0060		Nitab4.5_0001551g0050									Nitab4.5_0000062g0030	Nitab4.5_0003118g0030		Nitab4.5_0002516g0050
Nitab4.5_0005560g0040	Nitab4.5_0000072g0530											Nitab4.5_0028684g0010	Nitab4.5_0000403g0010		Nitab4.5_0000274g0230									Nitab4.5_0000109g0100	Nitab4.5_0003261g0010		Nitab4.5_0002556g0040
Nitab4.5_0005902g0010	Nitab4.5_0000651g0010											Nitab4.5_0000642g0110	Nitab4.5_0000403g0020		Nitab4.5_0000424g0010									Nitab4.5_0000110g0020	Nitab4.5_0003460g0020		Nitab4.5_0002579g0030
Nitab4.5_0006052g0010	Nitab4.5_0001119g0040											Nitab4.5_0000141g0100	Nitab4.5_0001161g0010		Nitab4.5_0000981g0070									Nitab4.5_0000117g0050	Nitab4.5_0003634g0030		Nitab4.5_0002997g0020
Nitab4.5_0006052g0040	Nitab4.5_0001059g0220											Nitab4.5_0001128g0130	Nitab4.5_0000271g0040		Nitab4.5_0001562g0060									Nitab4.5_0000118g0080	Nitab4.5_0003887g0030		Nitab4.5_0004646g0080
Nitab4.5_0006650g0020	Nitab4.5_0000316g0090											Nitab4.5_0002635g0070	Nitab4.5_0004443g0050		Nitab4.5_0006683g0070									Nitab4.5_0000156g0090	Nitab4.5_0004012g0010		Nitab4.5_0004965g0020
Nitab4.5_0006692g0010	Nitab4.5_0003029g0030											Nitab4.5_0000315g0120	Nitab4.5_0000185g0110		Nitab4.5_0001863g0230									Nitab4.5_0000170g0130	Nitab4.5_0004023g0020		Nitab4.5_0005713g0030
Nitab4.5_0007133g0040	Nitab4.5_0006307g0010											Nitab4.5_0012857g0010	Nitab4.5_0000600g0050		Nitab4.5_0000292g0090									Nitab4.5_0000246g0270	Nitab4.5_0004126g0030		Nitab4.5_0008663g0020
Nitab4.5_0007287g0050	Nitab4.5_0002100g0110											Nitab4.5_0005116g0010	Nitab4.5_0001088g0130		Nitab4.5_0001230g0040									Nitab4.5_0000309g0020	Nitab4.5_0004164g0040		Nitab4.5_0009781g0010
Nitab4.5_0007429g0050	Nitab4.5_0003259g0090											Nitab4.5_0018665g0010	Nitab4.5_0002211g0060		Nitab4.5_0001894g0010									Nitab4.5_0000343g0060	Nitab4.5_0004490g0020		Nitab4.5_0015741g0010
Nitab4.5_0007566g0010	Nitab4.5_0004983g0030											Nitab4.5_0000789g0070	Nitab4.5_0002236g0020		Nitab4.5_0002815g0110									Nitab4.5_0000532g0070	Nitab4.5_0004646g0010
Nitab4.5_0008073g0010	Nitab4.5_0000622g0010											Nitab4.5_0005634g0060	Nitab4.5_0002236g0040		Nitab4.5_0005392g0070									Nitab4.5_0000569g0160	Nitab4.5_0004840g0010
Nitab4.5_0008179g0010	Nitab4.5_0025536g0010											Nitab4.5_0000859g0240	Nitab4.5_0007739g0010		Nitab4.5_0005646g0010									Nitab4.5_0000753g0020	Nitab4.5_0004977g0070
Nitab4.5_0008239g0010	Nitab4.5_0006973g0030											Nitab4.5_0001580g0040	Nitab4.5_0000600g0080		Nitab4.5_0009329g0010									Nitab4.5_0000807g0070	Nitab4.5_0004977g0080
Nitab4.5_0008809g0010	Nitab4.5_0006166g0020											Nitab4.5_0007986g0020	Nitab4.5_0003090g0030		Nitab4.5_0000885g0030									Nitab4.5_0000883g0190	Nitab4.5_0005105g0020
Nitab4.5_0009556g0010	Nitab4.5_0000731g0010											Nitab4.5_0000283g0200	Nitab4.5_0000586g0010		Nitab4.5_0000170g0020									Nitab4.5_0000957g0130	Nitab4.5_0005371g0020
Nitab4.5_0009702g0010	Nitab4.5_0001028g0070											Nitab4.5_0000980g0350	Nitab4.5_0000512g0230		Nitab4.5_0000115g0330									Nitab4.5_0001014g0030	Nitab4.5_0005472g0090
Nitab4.5_0010151g0030	Nitab4.5_0002150g0050											Nitab4.5_0003771g0040	Nitab4.5_0000551g0250		Nitab4.5_0006270g0010									Nitab4.5_0001036g0110	Nitab4.5_0005492g0030
Nitab4.5_0010215g0010	Nitab4.5_0008177g0020											Nitab4.5_0000664g0210	Nitab4.5_0002526g0070		Nitab4.5_0009088g0010									Nitab4.5_0001119g0110	Nitab4.5_0005626g0030
Nitab4.5_0010248g0010	Nitab4.5_0000003g0710											Nitab4.5_0010768g0020	Nitab4.5_0003868g0010		Nitab4.5_0000729g0140									Nitab4.5_0001145g0040	Nitab4.5_0006121g0020
Nitab4.5_0010289g0010	Nitab4.5_0000305g0320											Nitab4.5_0004420g0070	Nitab4.5_0000421g0100		Nitab4.5_0005363g0010									Nitab4.5_0001439g0050	Nitab4.5_0006713g0010
Nitab4.5_0010479g0010	Nitab4.5_0000675g0050											Nitab4.5_0007193g0030	Nitab4.5_0000058g0020		Nitab4.5_0000297g0310									Nitab4.5_0001461g0070	Nitab4.5_0007257g0030
Nitab4.5_0011813g0010	Nitab4.5_0001992g0090											Nitab4.5_0001581g0010	Nitab4.5_0000898g0070		Nitab4.5_0001252g0010									Nitab4.5_0001488g0020	Nitab4.5_0007346g0060
Nitab4.5_0012256g0020	Nitab4.5_0002046g0080											Nitab4.5_0001959g0030	Nitab4.5_0001817g0020		Nitab4.5_0001252g0030									Nitab4.5_0001693g0090	Nitab4.5_0007406g0010
Nitab4.5_0012894g0010	Nitab4.5_0004613g0080											Nitab4.5_0003623g0020	Nitab4.5_0008890g0010		Nitab4.5_0003260g0030									Nitab4.5_0001842g0110	Nitab4.5_0007406g0020
Nitab4.5_0013195g0010	Nitab4.5_0005678g0040											Nitab4.5_0009876g0020	Nitab4.5_0000355g0250		Nitab4.5_0001454g0020									Nitab4.5_0001901g0010	Nitab4.5_0008401g0020
Nitab4.5_0020114g0010	Nitab4.5_0000941g0220											Nitab4.5_0000863g0200	Nitab4.5_0000601g0120		Nitab4.5_0005144g0010									Nitab4.5_0002027g0030	Nitab4.5_0008507g0010
Nitab4.5_0004937g0030	Nitab4.5_0001701g0030											Nitab4.5_0002401g0010	Nitab4.5_0003039g0040		Nitab4.5_0004738g0070									Nitab4.5_0002027g0070	Nitab4.5_0009556g0010
Nitab4.5_0001972g0020	Nitab4.5_0003611g0030											Nitab4.5_0000392g0060	Nitab4.5_0012385g0010		Nitab4.5_0000297g0290									Nitab4.5_0002188g0020	Nitab4.5_0009901g0040
Nitab4.5_0000602g0060	Nitab4.5_0008120g0040											Nitab4.5_0000090g0330	Nitab4.5_0026202g0010		Nitab4.5_0003122g0050									Nitab4.5_0002278g0080	Nitab4.5_0010091g0010
Nitab4.5_0001192g0070	Nitab4.5_0002871g0010											Nitab4.5_0003315g0090	Nitab4.5_0000777g0080		Nitab4.5_0000857g0030									Nitab4.5_0002547g0010	Nitab4.5_0010261g0040
Nitab4.5_0001297g0040	Nitab4.5_0002978g0090											Nitab4.5_0000978g0110	Nitab4.5_0004682g0020		Nitab4.5_0009917g0010									Nitab4.5_0003005g0010	Nitab4.5_0010395g0010
Nitab4.5_0011492g0030	Nitab4.5_0008197g0010											Nitab4.5_0002466g0030	Nitab4.5_0000470g0230		Nitab4.5_0000327g0130									Nitab4.5_0003035g0030	Nitab4.5_0010991g0040
Nitab4.5_0001454g0060	Nitab4.5_0001984g0070											Nitab4.5_0009319g0010	Nitab4.5_0001088g0170		Nitab4.5_0000327g0140									Nitab4.5_0004156g0010	Nitab4.5_0012408g0020
Nitab4.5_0011117g0020	Nitab4.5_0005426g0010											Nitab4.5_0000015g0020	Nitab4.5_0004682g0010		Nitab4.5_0000527g0150									Nitab4.5_0004937g0060	Nitab4.5_0013455g0030
Nitab4.5_0000264g0190	Nitab4.5_0000134g0170											Nitab4.5_0011338g0010	Nitab4.5_0010294g0020		Nitab4.5_0008240g0010									Nitab4.5_0005240g0010	Nitab4.5_0015407g0010
Nitab4.5_0006202g0040	Nitab4.5_0000134g0180											Nitab4.5_0002211g0120	Nitab4.5_0010294g0030		Nitab4.5_0005808g0010									Nitab4.5_0006052g0010	Nitab4.5_0015894g0010
Nitab4.5_0004327g0010	Nitab4.5_0000344g0070											Nitab4.5_0002236g0010	Nitab4.5_0004342g0120		Nitab4.5_0000246g0260									Nitab4.5_0006267g0010	Nitab4.5_0003468g0020
Nitab4.5_0007501g0030	Nitab4.5_0000680g0060											Nitab4.5_0002902g0060	Nitab4.5_0001886g0060		Nitab4.5_0001145g0020									Nitab4.5_0006650g0020	Nitab4.5_0001730g0060
Nitab4.5_0012525g0010	Nitab4.5_0002080g0050											Nitab4.5_0002334g0100	Nitab4.5_0003110g0130		Nitab4.5_0000679g0100									Nitab4.5_0006692g0010	Nitab4.5_0000318g0050
Nitab4.5_0000044g0390	Nitab4.5_0002234g0090											Nitab4.5_0002716g0070	Nitab4.5_0012899g0010		Nitab4.5_0003202g0060									Nitab4.5_0007429g0050	Nitab4.5_0002989g0010
Nitab4.5_0000232g0040	Nitab4.5_0002718g0050											Nitab4.5_0000976g0040	Nitab4.5_0000481g0010		Nitab4.5_0003626g0040									Nitab4.5_0008239g0010	Nitab4.5_0000058g0190
Nitab4.5_0000778g0020	Nitab4.5_0002853g0100											Nitab4.5_0001034g0160	Nitab4.5_0000486g0010		Nitab4.5_0003084g0040									Nitab4.5_0009702g0010	Nitab4.5_0000666g0120
Nitab4.5_0000836g0120	Nitab4.5_0003865g0120											Nitab4.5_0002016g0060	Nitab4.5_0005506g0020		Nitab4.5_0000795g0070									Nitab4.5_0010151g0030	Nitab4.5_0002107g0060
Nitab4.5_0000588g0250	Nitab4.5_0006179g0020											Nitab4.5_0002944g0120	Nitab4.5_0002320g0030		Nitab4.5_0004177g0020									Nitab4.5_0011813g0010	Nitab4.5_0003134g0030
Nitab4.5_0000054g0220	Nitab4.5_0006239g0040											Nitab4.5_0005249g0050	Nitab4.5_0002960g0030		Nitab4.5_0003284g0010									Nitab4.5_0014342g0010	Nitab4.5_0008767g0010
Nitab4.5_0007401g0010	Nitab4.5_0006355g0030											Nitab4.5_0007367g0050	Nitab4.5_0007657g0030		Nitab4.5_0005423g0030									Nitab4.5_0004937g0030	Nitab4.5_0002439g0100
Nitab4.5_0000200g0060	Nitab4.5_0015172g0010											Nitab4.5_0000435g0080	Nitab4.5_0006000g0010		Nitab4.5_0000185g0300									Nitab4.5_0000760g0050	Nitab4.5_0006889g0010
Nitab4.5_0000200g0080	Nitab4.5_0012258g0010											Nitab4.5_0000876g0060	Nitab4.5_0000117g0160		Nitab4.5_0011624g0010									Nitab4.5_0000446g0210	Nitab4.5_0001922g0020
Nitab4.5_0007575g0010	Nitab4.5_0004594g0010											Nitab4.5_0000876g0070	Nitab4.5_0004361g0070		Nitab4.5_0001241g0070									Nitab4.5_0001861g0120	Nitab4.5_0001552g0070
Nitab4.5_0007575g0020	Nitab4.5_0008438g0040											Nitab4.5_0001361g0010	Nitab4.5_0000349g0330		Nitab4.5_0002598g0090									Nitab4.5_0001192g0070	Nitab4.5_0008720g0010
Nitab4.5_0000069g0590	Nitab4.5_0006239g0020											Nitab4.5_0001361g0060	Nitab4.5_0000568g0030		Nitab4.5_0006117g0040									Nitab4.5_0001297g0040	Nitab4.5_0003010g0030
Nitab4.5_0003304g0010	Nitab4.5_0003622g0030											Nitab4.5_0002097g0010	Nitab4.5_0004599g0080		Nitab4.5_0006117g0050									Nitab4.5_0011492g0030	Nitab4.5_0004954g0010
Nitab4.5_0002642g0100	Nitab4.5_0000355g0180											Nitab4.5_0004666g0020	Nitab4.5_0007674g0040		Nitab4.5_0000707g0010									Nitab4.5_0001454g0060	Nitab4.5_0013459g0010
Nitab4.5_0002824g0090	Nitab4.5_0001216g0080											Nitab4.5_0002577g0030	Nitab4.5_0012890g0020		Nitab4.5_0001816g0010									Nitab4.5_0011117g0020	Nitab4.5_0001244g0160
Nitab4.5_0000769g0110	Nitab4.5_0001269g0060											Nitab4.5_0004445g0080	Nitab4.5_0000512g0170		Nitab4.5_0002886g0110									Nitab4.5_0000919g0010	Nitab4.5_0015477g0010
Nitab4.5_0001019g0080	Nitab4.5_0001269g0070											Nitab4.5_0000412g0010	Nitab4.5_0002526g0030		Nitab4.5_0012494g0040									Nitab4.5_0002259g0090	Nitab4.5_0011409g0030
Nitab4.5_0001961g0040	Nitab4.5_0012157g0030											Nitab4.5_0004560g0020	Nitab4.5_0001267g0020		Nitab4.5_0000170g0060									Nitab4.5_0000264g0190	Nitab4.5_0008316g0020
Nitab4.5_0011990g0010	Nitab4.5_0000585g0010											Nitab4.5_0005061g0040	Nitab4.5_0003822g0010		Nitab4.5_0000977g0040									Nitab4.5_0006202g0040	Nitab4.5_0000247g0050
Nitab4.5_0004610g0020	Nitab4.5_0000585g0030											Nitab4.5_0005233g0040	Nitab4.5_0011433g0020		Nitab4.5_0000729g0130									Nitab4.5_0004327g0010	Nitab4.5_0012389g0010
Nitab4.5_0009771g0010	Nitab4.5_0001950g0060											Nitab4.5_0012252g0010	Nitab4.5_0001278g0080		Nitab4.5_0002275g0010									Nitab4.5_0007501g0030	Nitab4.5_0000195g0050
Nitab4.5_0000732g0130	Nitab4.5_0004979g0130											Nitab4.5_0002886g0030	Nitab4.5_0001359g0020		Nitab4.5_0005939g0020									Nitab4.5_0012525g0010	Nitab4.5_0000263g0090
Nitab4.5_0002710g0030	Nitab4.5_0005997g0010											Nitab4.5_0001200g0120	Nitab4.5_0000072g0530		Nitab4.5_0003030g0080									Nitab4.5_0000836g0120	Nitab4.5_0000928g0060
Nitab4.5_0002046g0140	Nitab4.5_0009598g0010											Nitab4.5_0000140g0200	Nitab4.5_0001548g0010		Nitab4.5_0000315g0200									Nitab4.5_0000588g0250	Nitab4.5_0003331g0020
Nitab4.5_0002450g0150	Nitab4.5_0010037g0020											Nitab4.5_0001200g0100	Nitab4.5_0000252g0040		Nitab4.5_0004103g0020									Nitab4.5_0003603g0070	Nitab4.5_0001360g0180
Nitab4.5_0001437g0070	Nitab4.5_0000086g0050											Nitab4.5_0001834g0020	Nitab4.5_0001664g0040		Nitab4.5_0002022g0010									Nitab4.5_0000723g0150	Nitab4.5_0025932g0010
Nitab4.5_0005622g0070	Nitab4.5_0012351g0020											Nitab4.5_0002886g0040	Nitab4.5_0002483g0010		Nitab4.5_0000864g0110									Nitab4.5_0003883g0030	Nitab4.5_0001071g0090
Nitab4.5_0000956g0060	Nitab4.5_0001390g0020											Nitab4.5_0003346g0090	Nitab4.5_0000695g0170		Nitab4.5_0007398g0020									Nitab4.5_0000054g0220	Nitab4.5_0002891g0010
Nitab4.5_0008316g0010	Nitab4.5_0003738g0010											Nitab4.5_0000516g0110	Nitab4.5_0000316g0090		Nitab4.5_0003381g0020									Nitab4.5_0007401g0010	Nitab4.5_0008036g0010
Nitab4.5_0000488g0010	Nitab4.5_0000213g0170											Nitab4.5_0001375g0160	Nitab4.5_0003029g0030		Nitab4.5_0005634g0030									Nitab4.5_0000200g0060	Nitab4.5_0011373g0010
Nitab4.5_0002733g0020	Nitab4.5_0000398g0020											Nitab4.5_0001083g0010	Nitab4.5_0005538g0010		Nitab4.5_0000408g0160									Nitab4.5_0000200g0080	Nitab4.5_0001241g0040
Nitab4.5_0009614g0010	Nitab4.5_0004320g0020											Nitab4.5_0005990g0020	Nitab4.5_0000163g0200		Nitab4.5_0005083g0010									Nitab4.5_0007575g0010	Nitab4.5_0001336g0060
Nitab4.5_0001509g0060	Nitab4.5_0017990g0020											Nitab4.5_0002394g0010	Nitab4.5_0000622g0010		Nitab4.5_0002151g0010									Nitab4.5_0007575g0020	Nitab4.5_0004445g0020
Nitab4.5_0002841g0040	Nitab4.5_0000664g0230											Nitab4.5_0002419g0020	Nitab4.5_0001701g0170		Nitab4.5_0000505g0120									Nitab4.5_0000069g0590	Nitab4.5_0000383g0260
Nitab4.5_0004240g0050	Nitab4.5_0000788g0020											Nitab4.5_0006565g0010	Nitab4.5_0025536g0010		Nitab4.5_0000639g0190									Nitab4.5_0003304g0010	Nitab4.5_0002252g0080
Nitab4.5_0003532g0020	Nitab4.5_0000566g0280											Nitab4.5_0002419g0050	Nitab4.5_0006973g0030		Nitab4.5_0004087g0010									Nitab4.5_0002642g0100	Nitab4.5_0000121g0140
Nitab4.5_0004326g0020	Nitab4.5_0006787g0010											Nitab4.5_0003529g0010	Nitab4.5_0002403g0050		Nitab4.5_0000396g0180									Nitab4.5_0002824g0090	Nitab4.5_0000605g0210
Nitab4.5_0001833g0020	Nitab4.5_0003581g0060											Nitab4.5_0005990g0050	Nitab4.5_0000874g0040		Nitab4.5_0003339g0020									Nitab4.5_0000092g0310	Nitab4.5_0001923g0010
Nitab4.5_0000217g0070	Nitab4.5_0000116g0140											Nitab4.5_0012460g0010	Nitab4.5_0003373g0080		Nitab4.5_0011040g0010									Nitab4.5_0000769g0110	Nitab4.5_0002219g0090
Nitab4.5_0000291g0050	Nitab4.5_0000803g0070											Nitab4.5_0005233g0010	Nitab4.5_0007162g0020		Nitab4.5_0002345g0110									Nitab4.5_0001019g0080	Nitab4.5_0003487g0080
Nitab4.5_0002335g0020	Nitab4.5_0002304g0070											Nitab4.5_0001184g0040	Nitab4.5_0000282g0020		Nitab4.5_0006475g0020									Nitab4.5_0001961g0040	Nitab4.5_0003995g0040
Nitab4.5_0005163g0070	Nitab4.5_0004086g0060											Nitab4.5_0002813g0010	Nitab4.5_0000731g0010		Nitab4.5_0000026g0120									Nitab4.5_0011990g0010	Nitab4.5_0000673g0090
Nitab4.5_0011021g0010	Nitab4.5_0002524g0010											Nitab4.5_0003076g0060	Nitab4.5_0002294g0120		Nitab4.5_0000741g0010									Nitab4.5_0004610g0020	Nitab4.5_0003063g0040
Nitab4.5_0001885g0040	Nitab4.5_0000779g0050											Nitab4.5_0003219g0010	Nitab4.5_0008177g0020		Nitab4.5_0001643g0100									Nitab4.5_0009771g0010	Nitab4.5_0003668g0020
Nitab4.5_0011433g0030	Nitab4.5_0004474g0030											Nitab4.5_0009794g0010	Nitab4.5_0000305g0320		Nitab4.5_0000417g0010									Nitab4.5_0000838g0160	Nitab4.5_0008166g0030
Nitab4.5_0000108g0290	Nitab4.5_0001246g0020											Nitab4.5_0009934g0010	Nitab4.5_0000319g0310		Nitab4.5_0010891g0030									Nitab4.5_0000732g0120	Nitab4.5_0000498g0060
Nitab4.5_0001014g0060	Nitab4.5_0001256g0090											Nitab4.5_0000073g0330	Nitab4.5_0002046g0080		Nitab4.5_0000163g0120									Nitab4.5_0000732g0130	Nitab4.5_0010135g0010
Nitab4.5_0001128g0070	Nitab4.5_0003913g0020											Nitab4.5_0000400g0140	Nitab4.5_0003980g0090		Nitab4.5_0000297g0050									Nitab4.5_0004452g0030	Nitab4.5_0000059g0020
Nitab4.5_0001902g0040	Nitab4.5_0007834g0020											Nitab4.5_0004234g0120	Nitab4.5_0004294g0010		Nitab4.5_0001778g0110									Nitab4.5_0005513g0050	Nitab4.5_0006641g0010
Nitab4.5_0001967g0020	Nitab4.5_0003603g0100											Nitab4.5_0000472g0020	Nitab4.5_0004613g0080		Nitab4.5_0000026g0340									Nitab4.5_0000222g0300	Nitab4.5_0000025g0180
Nitab4.5_0000427g0060	Nitab4.5_0000244g0110											Nitab4.5_0001589g0010	Nitab4.5_0006583g0010		Nitab4.5_0000642g0280									Nitab4.5_0013139g0020	Nitab4.5_0000516g0040
Nitab4.5_0000428g0390	Nitab4.5_0000989g0030											Nitab4.5_0004161g0090	Nitab4.5_0007853g0030		Nitab4.5_0002312g0040									Nitab4.5_0002710g0030	Nitab4.5_0001375g0130
Nitab4.5_0001140g0170	Nitab4.5_0001110g0150											Nitab4.5_0001485g0080	Nitab4.5_0014640g0010		Nitab4.5_0002965g0020									Nitab4.5_0001211g0010	Nitab4.5_0003963g0010
Nitab4.5_0001978g0050	Nitab4.5_0009857g0010											Nitab4.5_0009401g0010	Nitab4.5_0003280g0060		Nitab4.5_0003694g0060									Nitab4.5_0000574g0100	Nitab4.5_0004859g0050
Nitab4.5_0000021g0200	Nitab4.5_0013205g0010											Nitab4.5_0002885g0100	Nitab4.5_0000941g0220		Nitab4.5_0003786g0010									Nitab4.5_0002046g0140	Nitab4.5_0000758g0040
Nitab4.5_0014534g0010	Nitab4.5_0004454g0040											Nitab4.5_0000070g0050	Nitab4.5_0001701g0030		Nitab4.5_0001208g0140									Nitab4.5_0002450g0150	Nitab4.5_0001315g0170
Nitab4.5_0000090g0050	Nitab4.5_0001998g0050											Nitab4.5_0006557g0020	Nitab4.5_0003611g0030		Nitab4.5_0005232g0070									Nitab4.5_0000561g0090	Nitab4.5_0002859g0040
Nitab4.5_0010830g0040	Nitab4.5_0002738g0060											Nitab4.5_0004492g0010	Nitab4.5_0001770g0110		Nitab4.5_0009934g0020									Nitab4.5_0001401g0190	Nitab4.5_0000122g0060
Nitab4.5_0000283g0070	Nitab4.5_0003185g0070											Nitab4.5_0004492g0020	Nitab4.5_0013628g0020		Nitab4.5_0000083g0180									Nitab4.5_0000956g0060	Nitab4.5_0001955g0170
Nitab4.5_0003951g0020	Nitab4.5_0008614g0010											Nitab4.5_0011801g0020	Nitab4.5_0002871g0010		Nitab4.5_0001537g0010									Nitab4.5_0008316g0010	Nitab4.5_0004359g0050
Nitab4.5_0008316g0030	Nitab4.5_0000208g0200											Nitab4.5_0001062g0050	Nitab4.5_0004837g0050		Nitab4.5_0008943g0030									Nitab4.5_0000488g0010	Nitab4.5_0000664g0010
Nitab4.5_0000204g0020	Nitab4.5_0004895g0030											Nitab4.5_0002452g0020	Nitab4.5_0001339g0010		Nitab4.5_0002940g0010									Nitab4.5_0002733g0020	Nitab4.5_0003558g0020
Nitab4.5_0011341g0020	Nitab4.5_0006638g0030											Nitab4.5_0002487g0010	Nitab4.5_0002978g0090		Nitab4.5_0000077g0100									Nitab4.5_0009614g0010	Nitab4.5_0005563g0010
Nitab4.5_0000141g0100	Nitab4.5_0010492g0010											Nitab4.5_0004505g0010	Nitab4.5_0006574g0050		Nitab4.5_0002124g0010									Nitab4.5_0001509g0060	Nitab4.5_0003563g0020
Nitab4.5_0001128g0130	Nitab4.5_0017241g0010											Nitab4.5_0001997g0090	Nitab4.5_0008197g0010		Nitab4.5_0003857g0040									Nitab4.5_0002841g0040	Nitab4.5_0003563g0050
Nitab4.5_0002635g0070	Nitab4.5_0000551g0100											Nitab4.5_0005900g0080	Nitab4.5_0000134g0170		Nitab4.5_0000157g0040									Nitab4.5_0005545g0030	Nitab4.5_0001574g0130
Nitab4.5_0001568g0030	Nitab4.5_0006195g0060											Nitab4.5_0004407g0010	Nitab4.5_0000134g0180		Nitab4.5_0003937g0020									Nitab4.5_0003156g0080	Nitab4.5_0003263g0040
Nitab4.5_0000315g0120	Nitab4.5_0001176g0060											Nitab4.5_0011515g0030	Nitab4.5_0000680g0060		Nitab4.5_0001387g0020									Nitab4.5_0003532g0020	Nitab4.5_0001488g0100
Nitab4.5_0012857g0010	Nitab4.5_0003509g0040											Nitab4.5_0000141g0090	Nitab4.5_0001083g0130		Nitab4.5_0004010g0080									Nitab4.5_0001833g0020	Nitab4.5_0012668g0020
Nitab4.5_0005116g0010	Nitab4.5_0000351g0010											Nitab4.5_0001551g0040	Nitab4.5_0002080g0050		Nitab4.5_0000555g0150									Nitab4.5_0000508g0040	Nitab4.5_0001028g0040
Nitab4.5_0018665g0010	Nitab4.5_0001018g0120											Nitab4.5_0002055g0020	Nitab4.5_0002234g0090		Nitab4.5_0000123g0490									Nitab4.5_0000614g0060	Nitab4.5_0000335g0170
Nitab4.5_0000789g0070	Nitab4.5_0001803g0070											Nitab4.5_0005487g0010	Nitab4.5_0002718g0050		Nitab4.5_0000360g0020									Nitab4.5_0000291g0050	Nitab4.5_0005776g0030
Nitab4.5_0005634g0060	Nitab4.5_0001913g0060											Nitab4.5_0010461g0020	Nitab4.5_0002853g0100		Nitab4.5_0000962g0020									Nitab4.5_0002335g0020	Nitab4.5_0000288g0030
Nitab4.5_0000859g0240	Nitab4.5_0003939g0020											Nitab4.5_0000009g0500	Nitab4.5_0003865g0120		Nitab4.5_0003246g0130									Nitab4.5_0005163g0070	Nitab4.5_0000661g0070
Nitab4.5_0001580g0040	Nitab4.5_0000038g0130											Nitab4.5_0001274g0040	Nitab4.5_0006179g0020		Nitab4.5_0001585g0080									Nitab4.5_0000024g0160	Nitab4.5_0001540g0070
Nitab4.5_0000283g0200	Nitab4.5_0004707g0060											Nitab4.5_0002486g0040	Nitab4.5_0006239g0040		Nitab4.5_0002818g0080									Nitab4.5_0001468g0130	Nitab4.5_0002720g0030
Nitab4.5_0000980g0350	Nitab4.5_0006091g0020											Nitab4.5_0003603g0040	Nitab4.5_0015172g0010		Nitab4.5_0013596g0010									Nitab4.5_0000108g0290	Nitab4.5_0002723g0040
Nitab4.5_0002543g0110	Nitab4.5_0007383g0010											Nitab4.5_0005466g0030	Nitab4.5_0008438g0040		Nitab4.5_0002369g0010									Nitab4.5_0001014g0060	Nitab4.5_0009169g0040
Nitab4.5_0003771g0040	Nitab4.5_0005609g0080											Nitab4.5_0001789g0120	Nitab4.5_0003497g0070		Nitab4.5_0002675g0030									Nitab4.5_0001128g0070	Nitab4.5_0000726g0070
Nitab4.5_0000664g0210	Nitab4.5_0001781g0090											Nitab4.5_0004653g0020	Nitab4.5_0006239g0020		Nitab4.5_0004171g0030									Nitab4.5_0007461g0020	Nitab4.5_0003806g0010
Nitab4.5_0000664g0250	Nitab4.5_0000053g0180											Nitab4.5_0003841g0040	Nitab4.5_0001269g0060		Nitab4.5_0000968g0020									Nitab4.5_0001902g0040	Nitab4.5_0004010g0070
Nitab4.5_0001567g0120	Nitab4.5_0000833g0060											Nitab4.5_0000076g0060	Nitab4.5_0012157g0030		Nitab4.5_0001409g0180									Nitab4.5_0001967g0020	Nitab4.5_0001323g0130
Nitab4.5_0001567g0150	Nitab4.5_0010835g0010											Nitab4.5_0001181g0050	Nitab4.5_0002300g0100		Nitab4.5_0010129g0010									Nitab4.5_0001031g0030	Nitab4.5_0006860g0020
Nitab4.5_0004420g0070	Nitab4.5_0011475g0010											Nitab4.5_0002005g0020	Nitab4.5_0002740g0020		Nitab4.5_0000005g0440									Nitab4.5_0002887g0130	Nitab4.5_0000105g0060
Nitab4.5_0007193g0030	Nitab4.5_0001823g0050											Nitab4.5_0007410g0030	Nitab4.5_0000585g0010		Nitab4.5_0000007g0270									Nitab4.5_0000428g0390	Nitab4.5_0001538g0040
Nitab4.5_0001581g0010	Nitab4.5_0003110g0010											Nitab4.5_0001781g0170	Nitab4.5_0000585g0030		Nitab4.5_0000036g0450									Nitab4.5_0000039g0180	Nitab4.5_0000122g0120
Nitab4.5_0000109g0240	Nitab4.5_0000421g0130											Nitab4.5_0007799g0010	Nitab4.5_0004979g0130		Nitab4.5_0000057g0200									Nitab4.5_0004624g0040	Nitab4.5_0005724g0010
Nitab4.5_0001959g0030	Nitab4.5_0000513g0130											Nitab4.5_0005478g0020	Nitab4.5_0004979g0140		Nitab4.5_0000062g0300									Nitab4.5_0001140g0170	Nitab4.5_0001233g0010
Nitab4.5_0001787g0060	Nitab4.5_0002628g0060											Nitab4.5_0001473g0020	Nitab4.5_0005997g0010		Nitab4.5_0000098g0140									Nitab4.5_0014534g0010	Nitab4.5_0003347g0060
Nitab4.5_0003623g0020	Nitab4.5_0004498g0050											Nitab4.5_0008196g0010	Nitab4.5_0009598g0010		Nitab4.5_0000109g0550									Nitab4.5_0010830g0040	Nitab4.5_0000403g0010
Nitab4.5_0009876g0020	Nitab4.5_0005823g0010											Nitab4.5_0001241g0110	Nitab4.5_0010037g0020		Nitab4.5_0000125g0360									Nitab4.5_0010854g0010	Nitab4.5_0004443g0050
Nitab4.5_0005797g0040	Nitab4.5_0002589g0030											Nitab4.5_0000513g0100	Nitab4.5_0001855g0020		Nitab4.5_0000138g0140									Nitab4.5_0000283g0070	Nitab4.5_0000600g0050
Nitab4.5_0000863g0200	Nitab4.5_0000199g0040											Nitab4.5_0007626g0030	Nitab4.5_0012351g0020		Nitab4.5_0000203g0180									Nitab4.5_0002683g0050	Nitab4.5_0002211g0060
Nitab4.5_0002401g0010	Nitab4.5_0009228g0010											Nitab4.5_0008063g0010	Nitab4.5_0000213g0170		Nitab4.5_0000242g0110									Nitab4.5_0008316g0030	Nitab4.5_0002236g0020
Nitab4.5_0000385g0100	Nitab4.5_0005022g0010											Nitab4.5_0002532g0030	Nitab4.5_0004294g0050		Nitab4.5_0000256g0160									Nitab4.5_0002602g0010	Nitab4.5_0002236g0040
Nitab4.5_0000392g0060	Nitab4.5_0007287g0020											Nitab4.5_0007371g0040	Nitab4.5_0000664g0230		Nitab4.5_0000263g0230									Nitab4.5_0002055g0030	Nitab4.5_0004620g0010
Nitab4.5_0000635g0040	Nitab4.5_0006685g0020											Nitab4.5_0002222g0070	Nitab4.5_0000669g0220		Nitab4.5_0000302g0100									Nitab4.5_0000204g0020	Nitab4.5_0007739g0010
Nitab4.5_0003315g0090	Nitab4.5_0000642g0160											Nitab4.5_0003465g0090	Nitab4.5_0007806g0020		Nitab4.5_0000437g0160									Nitab4.5_0011341g0020	Nitab4.5_0000600g0080
Nitab4.5_0012394g0010	Nitab4.5_0009486g0010											Nitab4.5_0005936g0030	Nitab4.5_0000788g0020		Nitab4.5_0000439g0100									Nitab4.5_0028684g0010	Nitab4.5_0003090g0030
Nitab4.5_0000978g0110	Nitab4.5_0011340g0010											Nitab4.5_0000040g0470	Nitab4.5_0000566g0280		Nitab4.5_0000452g0070									Nitab4.5_0000642g0110	Nitab4.5_0012667g0020
Nitab4.5_0010022g0010	Nitab4.5_0000305g0060											Nitab4.5_0000413g0120	Nitab4.5_0006787g0010		Nitab4.5_0000529g0040									Nitab4.5_0008249g0030	Nitab4.5_0000586g0010
Nitab4.5_0001472g0090	Nitab4.5_0001084g0020											Nitab4.5_0001915g0030	Nitab4.5_0000116g0140		Nitab4.5_0000534g0070									Nitab4.5_0000141g0100	Nitab4.5_0000512g0230
Nitab4.5_0004581g0030	Nitab4.5_0001871g0030											Nitab4.5_0002499g0110	Nitab4.5_0000803g0070		Nitab4.5_0000534g0090									Nitab4.5_0001128g0130	Nitab4.5_0000421g0100
Nitab4.5_0006365g0030	Nitab4.5_0002370g0050											Nitab4.5_0004325g0010	Nitab4.5_0001097g0070		Nitab4.5_0000646g0120									Nitab4.5_0002635g0070	Nitab4.5_0000058g0020
Nitab4.5_0000856g0210	Nitab4.5_0000084g0110											Nitab4.5_0008718g0040	Nitab4.5_0002304g0070		Nitab4.5_0000728g0040									Nitab4.5_0006000g0110	Nitab4.5_0000898g0070
Nitab4.5_0000015g0020	Nitab4.5_0003745g0030											Nitab4.5_0000635g0010	Nitab4.5_0004474g0030		Nitab4.5_0000818g0100									Nitab4.5_0001568g0030	Nitab4.5_0001416g0060
Nitab4.5_0002211g0120	Nitab4.5_0001371g0100											Nitab4.5_0000798g0050	Nitab4.5_0001246g0020		Nitab4.5_0000855g0160									Nitab4.5_0005132g0100	Nitab4.5_0001894g0060
Nitab4.5_0002236g0010	Nitab4.5_0001533g0010											Nitab4.5_0002794g0030	Nitab4.5_0000376g0230		Nitab4.5_0001151g0010									Nitab4.5_0002167g0150	Nitab4.5_0005295g0010
Nitab4.5_0011338g0010	Nitab4.5_0000410g0310											Nitab4.5_0002580g0050	Nitab4.5_0001256g0090		Nitab4.5_0001151g0020									Nitab4.5_0000315g0120	Nitab4.5_0008890g0010
Nitab4.5_0002902g0060	Nitab4.5_0000620g0230											Nitab4.5_0006592g0010	Nitab4.5_0007834g0020		Nitab4.5_0001164g0190									Nitab4.5_0012857g0010	Nitab4.5_0000355g0250
Nitab4.5_0000976g0040	Nitab4.5_0003848g0020											Nitab4.5_0002317g0020	Nitab4.5_0001128g0120		Nitab4.5_0001232g0030									Nitab4.5_0005116g0010	Nitab4.5_0000601g0120
Nitab4.5_0001728g0050	Nitab4.5_0011714g0010											Nitab4.5_0004914g0010	Nitab4.5_0006000g0040		Nitab4.5_0001521g0050									Nitab4.5_0018665g0010	Nitab4.5_0026202g0010
Nitab4.5_0002230g0030	Nitab4.5_0000209g0020											Nitab4.5_0000191g0070	Nitab4.5_0006505g0030		Nitab4.5_0001580g0010									Nitab4.5_0000789g0070	Nitab4.5_0000734g0020
Nitab4.5_0002334g0100	Nitab4.5_0000192g0090											Nitab4.5_0003160g0020	Nitab4.5_0000244g0110		Nitab4.5_0001671g0100									Nitab4.5_0005634g0060	Nitab4.5_0000734g0030
Nitab4.5_0002584g0030	Nitab4.5_0000250g0190											Nitab4.5_0002750g0070	Nitab4.5_0001110g0150		Nitab4.5_0001671g0150									Nitab4.5_0000859g0240	Nitab4.5_0000777g0080
Nitab4.5_0002716g0070	Nitab4.5_0003079g0040											Nitab4.5_0005609g0010	Nitab4.5_0001110g0160		Nitab4.5_0002059g0090									Nitab4.5_0001580g0040	Nitab4.5_0004682g0020
Nitab4.5_0003330g0070	Nitab4.5_0002848g0070											Nitab4.5_0005908g0010	Nitab4.5_0013205g0010		Nitab4.5_0002059g0100									Nitab4.5_0000283g0200	Nitab4.5_0009888g0030
Nitab4.5_0000435g0080	Nitab4.5_0003109g0010											Nitab4.5_0005757g0020	Nitab4.5_0002738g0060		Nitab4.5_0002093g0010									Nitab4.5_0000980g0350	Nitab4.5_0012194g0010
Nitab4.5_0000675g0010	Nitab4.5_0001022g0030											Nitab4.5_0001834g0010	Nitab4.5_0003185g0070		Nitab4.5_0002312g0110									Nitab4.5_0002543g0110	Nitab4.5_0000470g0230
Nitab4.5_0000876g0060	Nitab4.5_0002052g0090											Nitab4.5_0000676g0300	Nitab4.5_0008614g0010		Nitab4.5_0002484g0080									Nitab4.5_0003771g0040	Nitab4.5_0003571g0020
Nitab4.5_0000876g0070	Nitab4.5_0011966g0010											Nitab4.5_0003944g0030	Nitab4.5_0002229g0190		Nitab4.5_0002575g0070									Nitab4.5_0002426g0040	Nitab4.5_0004682g0010
Nitab4.5_0001361g0010	Nitab4.5_0000236g0010											Nitab4.5_0000183g0150	Nitab4.5_0001194g0010		Nitab4.5_0002792g0060									Nitab4.5_0000664g0210	Nitab4.5_0010294g0020
Nitab4.5_0001361g0060	Nitab4.5_0000628g0110											Nitab4.5_0012693g0010	Nitab4.5_0004895g0030		Nitab4.5_0002796g0030									Nitab4.5_0000664g0250	Nitab4.5_0010294g0030
Nitab4.5_0001992g0130	Nitab4.5_0000636g0070											Nitab4.5_0000029g0060	Nitab4.5_0006638g0030		Nitab4.5_0003082g0020									Nitab4.5_0001567g0120	Nitab4.5_0000646g0110
Nitab4.5_0002016g0060	Nitab4.5_0000636g0120											Nitab4.5_0000197g0010	Nitab4.5_0010492g0010		Nitab4.5_0003141g0010									Nitab4.5_0001567g0150	Nitab4.5_0004342g0120
Nitab4.5_0002097g0010	Nitab4.5_0000965g0040											Nitab4.5_0002695g0140	Nitab4.5_0017241g0010		Nitab4.5_0003201g0010									Nitab4.5_0004495g0030	Nitab4.5_0000305g0140
Nitab4.5_0002577g0030	Nitab4.5_0003307g0010											Nitab4.5_0013295g0010	Nitab4.5_0006195g0060		Nitab4.5_0003721g0040									Nitab4.5_0004420g0070	Nitab4.5_0001004g0220
Nitab4.5_0004666g0020	Nitab4.5_0011146g0010											Nitab4.5_0001793g0150	Nitab4.5_0001176g0060		Nitab4.5_0003725g0030									Nitab4.5_0007193g0030	Nitab4.5_0001886g0060
Nitab4.5_0005249g0050	Nitab4.5_0006315g0010											Nitab4.5_0001179g0080	Nitab4.5_0003509g0040		Nitab4.5_0004038g0010									Nitab4.5_0001581g0010	Nitab4.5_0003110g0130
Nitab4.5_0009553g0020	Nitab4.5_0002760g0020											Nitab4.5_0001584g0010	Nitab4.5_0015723g0010		Nitab4.5_0004152g0010									Nitab4.5_0001787g0060	Nitab4.5_0003324g0020
Nitab4.5_0001583g0210	Nitab4.5_0000574g0130											Nitab4.5_0009756g0020	Nitab4.5_0000351g0010		Nitab4.5_0004448g0030									Nitab4.5_0003623g0020	Nitab4.5_0006414g0010
Nitab4.5_0000412g0010	Nitab4.5_0007727g0010											Nitab4.5_0000782g0010	Nitab4.5_0001800g0010		Nitab4.5_0004570g0030									Nitab4.5_0009876g0020	Nitab4.5_0012899g0010
Nitab4.5_0000953g0020	Nitab4.5_0000094g0100											Nitab4.5_0004550g0010	Nitab4.5_0003939g0020		Nitab4.5_0004650g0010									Nitab4.5_0001612g0070	Nitab4.5_0000486g0010
Nitab4.5_0001200g0120	Nitab4.5_0000865g0030											Nitab4.5_0000748g0140	Nitab4.5_0000016g0340		Nitab4.5_0004654g0010									Nitab4.5_0000863g0200	Nitab4.5_0003811g0100
Nitab4.5_0002886g0030	Nitab4.5_0005043g0060											Nitab4.5_0001799g0060	Nitab4.5_0001422g0050		Nitab4.5_0004776g0090									Nitab4.5_0002401g0010	Nitab4.5_0005506g0020
Nitab4.5_0004560g0020	Nitab4.5_0008991g0010											Nitab4.5_0001223g0170	Nitab4.5_0007383g0010		Nitab4.5_0004816g0090									Nitab4.5_0000172g0480	Nitab4.5_0002320g0030
Nitab4.5_0005061g0040	Nitab4.5_0000505g0110											Nitab4.5_0000976g0090	Nitab4.5_0005609g0080		Nitab4.5_0005006g0020									Nitab4.5_0013402g0010	Nitab4.5_0006000g0010
Nitab4.5_0005233g0040	Nitab4.5_0001998g0010											Nitab4.5_0003811g0090	Nitab4.5_0000833g0060		Nitab4.5_0005172g0010									Nitab4.5_0000978g0110	Nitab4.5_0000117g0160
Nitab4.5_0012252g0010	Nitab4.5_0002738g0070											Nitab4.5_0000886g0100	Nitab4.5_0010835g0010		Nitab4.5_0005722g0040									Nitab4.5_0002466g0030	Nitab4.5_0000329g0150
Nitab4.5_0000140g0200	Nitab4.5_0003136g0040											Nitab4.5_0004745g0020	Nitab4.5_0000421g0130		Nitab4.5_0006055g0060									Nitab4.5_0004581g0030	Nitab4.5_0004361g0070
Nitab4.5_0001200g0100	Nitab4.5_0013405g0010											Nitab4.5_0003474g0020	Nitab4.5_0000469g0170		Nitab4.5_0006171g0010									Nitab4.5_0009319g0010	Nitab4.5_0000349g0330
Nitab4.5_0001834g0020	Nitab4.5_0000505g0100											Nitab4.5_0003020g0040	Nitab4.5_0000513g0130		Nitab4.5_0006182g0010									Nitab4.5_0000303g0150	Nitab4.5_0000568g0030
Nitab4.5_0002886g0040	Nitab4.5_0001864g0060											Nitab4.5_0003337g0060	Nitab4.5_0002628g0060		Nitab4.5_0006318g0040									Nitab4.5_0003796g0080	Nitab4.5_0004599g0080
Nitab4.5_0000073g0330	Nitab4.5_0003167g0110											Nitab4.5_0002342g0130	Nitab4.5_0005823g0010		Nitab4.5_0006443g0010									Nitab4.5_0000856g0210	Nitab4.5_0012890g0020
Nitab4.5_0000472g0020	Nitab4.5_0001788g0010											Nitab4.5_0002229g0120	Nitab4.5_0002589g0030		Nitab4.5_0006513g0020									Nitab4.5_0004928g0060	Nitab4.5_0004623g0040
Nitab4.5_0000516g0110	Nitab4.5_0006988g0040											Nitab4.5_0004679g0020	Nitab4.5_0000199g0040		Nitab4.5_0007212g0010									Nitab4.5_0000818g0040	Nitab4.5_0000512g0170
Nitab4.5_0001083g0010	Nitab4.5_0005784g0040											Nitab4.5_0005135g0010	Nitab4.5_0000308g0310		Nitab4.5_0007490g0050									Nitab4.5_0002211g0120	Nitab4.5_0002526g0030
Nitab4.5_0001184g0040	Nitab4.5_0001489g0040											Nitab4.5_0000178g0340	Nitab4.5_0000746g0010		Nitab4.5_0007687g0030									Nitab4.5_0002236g0010	Nitab4.5_0000706g0040
Nitab4.5_0001589g0010	Nitab4.5_0002051g0020											Nitab4.5_0001617g0060	Nitab4.5_0009228g0010		Nitab4.5_0007767g0020									Nitab4.5_0000105g0290	Nitab4.5_0001267g0020
Nitab4.5_0002394g0010	Nitab4.5_0001229g0010											Nitab4.5_0003200g0090	Nitab4.5_0005022g0010		Nitab4.5_0008526g0010									Nitab4.5_0002902g0060	Nitab4.5_0003822g0010
Nitab4.5_0002419g0020	Nitab4.5_0006239g0010											Nitab4.5_0000106g0210	Nitab4.5_0012264g0010		Nitab4.5_0008551g0010									Nitab4.5_0000976g0040	Nitab4.5_0001326g0130
Nitab4.5_0002419g0050	Nitab4.5_0006355g0020											Nitab4.5_0000071g0010	Nitab4.5_0000514g0040		Nitab4.5_0010305g0010									Nitab4.5_0001728g0050	Nitab4.5_0001714g0010
Nitab4.5_0002419g0060	Nitab4.5_0003491g0080											Nitab4.5_0008544g0010	Nitab4.5_0000227g0110		Nitab4.5_0013213g0010									Nitab4.5_0002230g0030	Nitab4.5_0002886g0140
Nitab4.5_0002813g0010	Nitab4.5_0000053g0170											Nitab4.5_0001663g0210	Nitab4.5_0000522g0170		Nitab4.5_0020402g0010									Nitab4.5_0002334g0100	Nitab4.5_0003274g0100
Nitab4.5_0003076g0060	Nitab4.5_0002980g0050											Nitab4.5_0002723g0050	Nitab4.5_0001084g0020		Nitab4.5_0026398g0010									Nitab4.5_0002584g0030	Nitab4.5_0011433g0020
Nitab4.5_0003529g0010	Nitab4.5_0000287g0380											Nitab4.5_0009169g0030	Nitab4.5_0001871g0030		Nitab4.5_0007754g0030									Nitab4.5_0002716g0070	Nitab4.5_0000861g0010
Nitab4.5_0004234g0120	Nitab4.5_0003427g0070											Nitab4.5_0002262g0160	Nitab4.5_0002370g0050		Nitab4.5_0010971g0010									Nitab4.5_0003330g0070	Nitab4.5_0001278g0080
Nitab4.5_0005233g0010	Nitab4.5_0005587g0030											Nitab4.5_0007386g0010	Nitab4.5_0003745g0030		Nitab4.5_0000993g0050									Nitab4.5_0000435g0080	Nitab4.5_0001359g0020
Nitab4.5_0005990g0020	Nitab4.5_0000229g0010											Nitab4.5_0003779g0050	Nitab4.5_0000410g0310		Nitab4.5_0000443g0140									Nitab4.5_0000876g0060	Nitab4.5_0001603g0030
Nitab4.5_0005990g0050	Nitab4.5_0008539g0020											Nitab4.5_0011556g0020	Nitab4.5_0000620g0230		Nitab4.5_0000259g0300									Nitab4.5_0000876g0070	Nitab4.5_0005252g0010
Nitab4.5_0006565g0010	Nitab4.5_0006801g0030											Nitab4.5_0004254g0040	Nitab4.5_0003848g0020		Nitab4.5_0000031g0470									Nitab4.5_0001361g0010	Nitab4.5_0007402g0050
Nitab4.5_0009794g0010	Nitab4.5_0001842g0010											Nitab4.5_0004853g0010	Nitab4.5_0000180g0090		Nitab4.5_0002285g0030									Nitab4.5_0001361g0060	Nitab4.5_0000072g0530
Nitab4.5_0009934g0010	Nitab4.5_0000790g0120											Nitab4.5_0000007g0320	Nitab4.5_0001101g0140		Nitab4.5_0004414g0020									Nitab4.5_0002016g0060	Nitab4.5_0000252g0040
Nitab4.5_0012460g0010	Nitab4.5_0000034g0150											Nitab4.5_0005274g0020	Nitab4.5_0000604g0040		Nitab4.5_0004987g0040									Nitab4.5_0002097g0010	Nitab4.5_0000375g0170
Nitab4.5_0000280g0010	Nitab4.5_0002454g0020											Nitab4.5_0005353g0010	Nitab4.5_0000192g0090		Nitab4.5_0003179g0060									Nitab4.5_0002577g0030	Nitab4.5_0001059g0220
Nitab4.5_0001485g0080	Nitab4.5_0012018g0010											Nitab4.5_0001401g0010	Nitab4.5_0001949g0070		Nitab4.5_0003969g0090									Nitab4.5_0002944g0120	Nitab4.5_0001105g0210
Nitab4.5_0009401g0010	Nitab4.5_0000113g0060											Nitab4.5_0001401g0060	Nitab4.5_0000250g0190		Nitab4.5_0000829g0070									Nitab4.5_0004666g0020	Nitab4.5_0002279g0110
Nitab4.5_0002885g0100	Nitab4.5_0000119g0420											Nitab4.5_0003726g0020	Nitab4.5_0000800g0020		Nitab4.5_0002986g0050									Nitab4.5_0005249g0050	Nitab4.5_0005441g0070
Nitab4.5_0000070g0050	Nitab4.5_0002436g0120											Nitab4.5_0003160g0080	Nitab4.5_0001931g0020		Nitab4.5_0017715g0010									Nitab4.5_0004445g0080	Nitab4.5_0008936g0020
Nitab4.5_0001953g0090	Nitab4.5_0000110g0200											Nitab4.5_0003160g0090	Nitab4.5_0002695g0030		Nitab4.5_0007856g0010									Nitab4.5_0002024g0020	Nitab4.5_0001059g0200
Nitab4.5_0004492g0010	Nitab4.5_0000625g0100											Nitab4.5_0000044g0630	Nitab4.5_0003079g0040		Nitab4.5_0000131g0150									Nitab4.5_0000412g0010	Nitab4.5_0001059g0230
Nitab4.5_0006557g0020	Nitab4.5_0000193g0120											Nitab4.5_0007995g0010	Nitab4.5_0001140g0110		Nitab4.5_0000143g0520									Nitab4.5_0000953g0020	Nitab4.5_0007486g0060
Nitab4.5_0010913g0020	Nitab4.5_0000434g0170											Nitab4.5_0002015g0040	Nitab4.5_0004788g0020		Nitab4.5_0005672g0040									Nitab4.5_0001200g0120	Nitab4.5_0008936g0030
Nitab4.5_0011801g0020	Nitab4.5_0001134g0090											Nitab4.5_0003979g0020	Nitab4.5_0000357g0340		Nitab4.5_0000006g0300									Nitab4.5_0002886g0030	Nitab4.5_0001925g0070
Nitab4.5_0001062g0050	Nitab4.5_0001735g0150											Nitab4.5_0004862g0050	Nitab4.5_0012774g0010		Nitab4.5_0007375g0020									Nitab4.5_0004560g0020	Nitab4.5_0010783g0020
Nitab4.5_0002452g0020	Nitab4.5_0002232g0010											Nitab4.5_0000057g0330	Nitab4.5_0000059g0360		Nitab4.5_0002568g0030									Nitab4.5_0005061g0040	Nitab4.5_0001925g0120
Nitab4.5_0002487g0010	Nitab4.5_0002499g0080											Nitab4.5_0003189g0020	Nitab4.5_0002848g0070		Nitab4.5_0000222g0080									Nitab4.5_0005233g0040	Nitab4.5_0004445g0090
Nitab4.5_0004505g0010	Nitab4.5_0003835g0020											Nitab4.5_0000006g0090	Nitab4.5_0003109g0010		Nitab4.5_0001486g0060									Nitab4.5_0012252g0010	Nitab4.5_0005078g0010
Nitab4.5_0009570g0020	Nitab4.5_0007845g0010											Nitab4.5_0000373g0060	Nitab4.5_0001022g0030		Nitab4.5_0006656g0060									Nitab4.5_0000140g0200	Nitab4.5_0001348g0190
Nitab4.5_0001997g0090	Nitab4.5_0007997g0010											Nitab4.5_0003463g0060	Nitab4.5_0002052g0090		Nitab4.5_0000150g0030									Nitab4.5_0001200g0100	Nitab4.5_0000695g0170
Nitab4.5_0005900g0080	Nitab4.5_0021747g0010											Nitab4.5_0008575g0020	Nitab4.5_0011966g0010		Nitab4.5_0002230g0020									Nitab4.5_0001834g0020	Nitab4.5_0001744g0060
Nitab4.5_0011515g0030	Nitab4.5_0001290g0160											Nitab4.5_0008266g0020	Nitab4.5_0000236g0010		Nitab4.5_0000209g0010									Nitab4.5_0002886g0040	Nitab4.5_0003128g0060
Nitab4.5_0000141g0090	Nitab4.5_0004725g0010											Nitab4.5_0006953g0010	Nitab4.5_0000364g0030		Nitab4.5_0000859g0200									Nitab4.5_0003346g0090	Nitab4.5_0000316g0090
Nitab4.5_0001551g0040	Nitab4.5_0003540g0150											Nitab4.5_0001031g0160	Nitab4.5_0000574g0020		Nitab4.5_0004054g0020									Nitab4.5_0010799g0010	Nitab4.5_0001029g0080
Nitab4.5_0002055g0020	Nitab4.5_0000140g0040											Nitab4.5_0001863g0220	Nitab4.5_0000636g0070		Nitab4.5_0005011g0020									Nitab4.5_0000073g0330	Nitab4.5_0006307g0010
Nitab4.5_0005487g0010	Nitab4.5_0002064g0010											Nitab4.5_0000044g0130	Nitab4.5_0000636g0120		Nitab4.5_0007686g0010									Nitab4.5_0000472g0020	Nitab4.5_0010434g0010
Nitab4.5_0009567g0010	Nitab4.5_0002790g0010											Nitab4.5_0003299g0010	Nitab4.5_0000826g0310		Nitab4.5_0000267g0110									Nitab4.5_0000516g0110	Nitab4.5_0003229g0040
Nitab4.5_0010461g0020	Nitab4.5_0000360g0120											Nitab4.5_0004343g0030	Nitab4.5_0000965g0040		Nitab4.5_0006094g0010									Nitab4.5_0000974g0030	Nitab4.5_0000163g0200
Nitab4.5_0000009g0500	Nitab4.5_0001807g0080											Nitab4.5_0000787g0190	Nitab4.5_0003307g0010		Nitab4.5_0004476g0050									Nitab4.5_0001083g0010	Nitab4.5_0005524g0020
Nitab4.5_0001274g0040	Nitab4.5_0001999g0030											Nitab4.5_0002736g0020	Nitab4.5_0011146g0010		Nitab4.5_0000329g0220									Nitab4.5_0001184g0040	Nitab4.5_0004320g0030
Nitab4.5_0002486g0040	Nitab4.5_0002259g0060											Nitab4.5_0028573g0010	Nitab4.5_0006315g0010		Nitab4.5_0001819g0100									Nitab4.5_0001283g0010	Nitab4.5_0009174g0010
Nitab4.5_0003603g0040	Nitab4.5_0011908g0010											Nitab4.5_0003648g0010	Nitab4.5_0003018g0040		Nitab4.5_0007276g0010									Nitab4.5_0001375g0160	Nitab4.5_0000622g0010
Nitab4.5_0005466g0030	Nitab4.5_0005819g0060											Nitab4.5_0003331g0100	Nitab4.5_0008772g0020		Nitab4.5_0000618g0040									Nitab4.5_0001589g0010	Nitab4.5_0001701g0170
Nitab4.5_0007258g0030	Nitab4.5_0003602g0030											Nitab4.5_0000798g0120	Nitab4.5_0013575g0010		Nitab4.5_0002882g0050									Nitab4.5_0002350g0030	Nitab4.5_0004125g0010
Nitab4.5_0000143g0580	Nitab4.5_0003902g0100											Nitab4.5_0002231g0050	Nitab4.5_0002760g0020		Nitab4.5_0003498g0040									Nitab4.5_0002394g0010	Nitab4.5_0025536g0010
Nitab4.5_0002826g0060	Nitab4.5_0009907g0030											Nitab4.5_0015866g0010	Nitab4.5_0000783g0110		Nitab4.5_0009215g0010									Nitab4.5_0002419g0020	Nitab4.5_0006973g0030
Nitab4.5_0001789g0120	Nitab4.5_0000319g0220											Nitab4.5_0017067g0010	Nitab4.5_0007092g0030		Nitab4.5_0001697g0070									Nitab4.5_0002419g0050	Nitab4.5_0000101g0040
Nitab4.5_0004653g0020	Nitab4.5_0001318g0050											Nitab4.5_0000147g0270	Nitab4.5_0000574g0130		Nitab4.5_0000257g0090									Nitab4.5_0002813g0010	Nitab4.5_0005150g0070
Nitab4.5_0003841g0040	Nitab4.5_0006389g0020											Nitab4.5_0002289g0120	Nitab4.5_0007727g0010		Nitab4.5_0010523g0020									Nitab4.5_0003076g0060	Nitab4.5_0002403g0050
Nitab4.5_0004331g0020	Nitab4.5_0000015g0210											Nitab4.5_0000845g0150	Nitab4.5_0005222g0010		Nitab4.5_0000587g0070									Nitab4.5_0003219g0010	Nitab4.5_0003753g0010
Nitab4.5_0000009g0310	Nitab4.5_0000463g0020											Nitab4.5_0000863g0230	Nitab4.5_0001998g0010		Nitab4.5_0009327g0020									Nitab4.5_0003529g0010	Nitab4.5_0006166g0020
Nitab4.5_0000076g0060	Nitab4.5_0000673g0030											Nitab4.5_0000209g0210	Nitab4.5_0002738g0070		Nitab4.5_0010551g0010									Nitab4.5_0004234g0120	Nitab4.5_0000874g0040
Nitab4.5_0000649g0260	Nitab4.5_0001962g0090											Nitab4.5_0011210g0030	Nitab4.5_0003136g0040		Nitab4.5_0008249g0040									Nitab4.5_0005233g0010	Nitab4.5_0001787g0010
Nitab4.5_0001225g0250	Nitab4.5_0002367g0170											Nitab4.5_0009280g0030	Nitab4.5_0013405g0010		Nitab4.5_0000461g0190									Nitab4.5_0005990g0020	Nitab4.5_0003373g0080
Nitab4.5_0002005g0020	Nitab4.5_0002439g0070											Nitab4.5_0000565g0110	Nitab4.5_0004704g0040		Nitab4.5_0003876g0010									Nitab4.5_0005990g0050	Nitab4.5_0002837g0030
Nitab4.5_0003029g0020	Nitab4.5_0005771g0020											Nitab4.5_0005478g0010	Nitab4.5_0000505g0100		Nitab4.5_0000012g0010									Nitab4.5_0006565g0010	Nitab4.5_0007162g0020
Nitab4.5_0005620g0040	Nitab4.5_0009965g0010											Nitab4.5_0000399g0060	Nitab4.5_0000639g0240		Nitab4.5_0000053g0200									Nitab4.5_0009794g0010	Nitab4.5_0000731g0010
Nitab4.5_0006133g0020	Nitab4.5_0012222g0020											Nitab4.5_0001617g0050	Nitab4.5_0006988g0040		Nitab4.5_0000207g0170									Nitab4.5_0009934g0010	Nitab4.5_0008177g0020
Nitab4.5_0007410g0030	Nitab4.5_0000459g0060											Nitab4.5_0004090g0080	Nitab4.5_0005784g0040		Nitab4.5_0000363g0160									Nitab4.5_0000280g0010	Nitab4.5_0000305g0320
Nitab4.5_0008054g0020	Nitab4.5_0004441g0010											Nitab4.5_0005097g0060	Nitab4.5_0000262g0170		Nitab4.5_0000366g0010									Nitab4.5_0000290g0040	Nitab4.5_0000319g0310
Nitab4.5_0000537g0120	Nitab4.5_0000716g0250											Nitab4.5_0000236g0060	Nitab4.5_0002051g0020		Nitab4.5_0000452g0020									Nitab4.5_0000333g0020	Nitab4.5_0000413g0140
Nitab4.5_0002216g0020	Nitab4.5_0001508g0070											Nitab4.5_0010734g0020	Nitab4.5_0001229g0010		Nitab4.5_0000534g0060									Nitab4.5_0001565g0030	Nitab4.5_0002046g0080
Nitab4.5_0003328g0080	Nitab4.5_0005648g0020											Nitab4.5_0004439g0100	Nitab4.5_0019649g0010		Nitab4.5_0000550g0060									Nitab4.5_0001036g0080	Nitab4.5_0002182g0070
Nitab4.5_0005478g0020	Nitab4.5_0006764g0070											Nitab4.5_0002257g0180	Nitab4.5_0006239g0010		Nitab4.5_0000662g0060									Nitab4.5_0002545g0060	Nitab4.5_0003980g0090
Nitab4.5_0000977g0110	Nitab4.5_0010472g0010											Nitab4.5_0000923g0050	Nitab4.5_0006355g0020		Nitab4.5_0000687g0100									Nitab4.5_0000283g0030	Nitab4.5_0004294g0010
Nitab4.5_0001473g0020	Nitab4.5_0000578g0170											Nitab4.5_0000222g0140	Nitab4.5_0000564g0020		Nitab4.5_0000771g0160									Nitab4.5_0000980g0040	Nitab4.5_0004613g0080
Nitab4.5_0001569g0130	Nitab4.5_0000915g0200											Nitab4.5_0001013g0080	Nitab4.5_0002980g0050		Nitab4.5_0000944g0100									Nitab4.5_0001485g0080	Nitab4.5_0006583g0010
Nitab4.5_0002053g0030	Nitab4.5_0008928g0030											Nitab4.5_0012276g0010	Nitab4.5_0000287g0380		Nitab4.5_0001164g0140									Nitab4.5_0009401g0010	Nitab4.5_0000941g0220
Nitab4.5_0003094g0030	Nitab4.5_0001235g0050											Nitab4.5_0001899g0070	Nitab4.5_0003427g0070		Nitab4.5_0001197g0010									Nitab4.5_0002885g0100	Nitab4.5_0003611g0030
Nitab4.5_0003815g0080	Nitab4.5_0000100g0110											Nitab4.5_0000180g0070	Nitab4.5_0005587g0030		Nitab4.5_0001346g0020									Nitab4.5_0000070g0050	Nitab4.5_0001770g0110
Nitab4.5_0000513g0100	Nitab4.5_0000078g0090											Nitab4.5_0000180g0080	Nitab4.5_0009820g0020		Nitab4.5_0001506g0100									Nitab4.5_0000719g0010	Nitab4.5_0003345g0020
Nitab4.5_0008063g0010	Nitab4.5_0001254g0010											Nitab4.5_0000149g0240	Nitab4.5_0000229g0010		Nitab4.5_0002383g0130									Nitab4.5_0001953g0090	Nitab4.5_0002871g0010
Nitab4.5_0002532g0030	Nitab4.5_0002438g0030											Nitab4.5_0000156g0210	Nitab4.5_0008539g0020		Nitab4.5_0002392g0100									Nitab4.5_0004492g0010	Nitab4.5_0001339g0010
Nitab4.5_0005082g0020	Nitab4.5_0000898g0060											Nitab4.5_0001170g0190	Nitab4.5_0006801g0030		Nitab4.5_0002516g0050									Nitab4.5_0005130g0020	Nitab4.5_0002978g0090
Nitab4.5_0000040g0470	Nitab4.5_0000559g0230											Nitab4.5_0003676g0080	Nitab4.5_0000174g0090		Nitab4.5_0002741g0180									Nitab4.5_0006557g0020	Nitab4.5_0008197g0010
Nitab4.5_0000375g0090	Nitab4.5_0000859g0190											Nitab4.5_0000693g0040	Nitab4.5_0005241g0060		Nitab4.5_0004624g0020									Nitab4.5_0011801g0020	Nitab4.5_0010367g0020
Nitab4.5_0000413g0120	Nitab4.5_0001714g0080											Nitab4.5_0000755g0140	Nitab4.5_0005692g0020		Nitab4.5_0004646g0080									Nitab4.5_0027416g0010	Nitab4.5_0006525g0010
Nitab4.5_0001915g0030	Nitab4.5_0000319g0290											Nitab4.5_0009324g0030	Nitab4.5_0000034g0150		Nitab4.5_0004965g0020									Nitab4.5_0001062g0050	Nitab4.5_0000134g0170
Nitab4.5_0002222g0070	Nitab4.5_0007028g0030											Nitab4.5_0000168g0120	Nitab4.5_0000116g0180		Nitab4.5_0005713g0030									Nitab4.5_0002452g0020	Nitab4.5_0000134g0180
Nitab4.5_0002499g0060	Nitab4.5_0000128g0200											Nitab4.5_0017412g0010	Nitab4.5_0002454g0020		Nitab4.5_0008315g0010									Nitab4.5_0002487g0010	Nitab4.5_0000680g0060
Nitab4.5_0005936g0030	Nitab4.5_0000710g0010											Nitab4.5_0005367g0010	Nitab4.5_0006664g0010		Nitab4.5_0008582g0010									Nitab4.5_0004505g0010	Nitab4.5_0001083g0130
Nitab4.5_0006764g0010	Nitab4.5_0001614g0200											Nitab4.5_0002137g0140	Nitab4.5_0012018g0010		Nitab4.5_0008596g0010									Nitab4.5_0001997g0090	Nitab4.5_0002080g0050
Nitab4.5_0007012g0010	Nitab4.5_0005726g0020											Nitab4.5_0000170g0350	Nitab4.5_0000915g0220		Nitab4.5_0008663g0020									Nitab4.5_0005900g0080	Nitab4.5_0002234g0090
Nitab4.5_0008718g0040	Nitab4.5_0000351g0080											Nitab4.5_0006169g0040	Nitab4.5_0000119g0420		Nitab4.5_0009642g0010									Nitab4.5_0000121g0200	Nitab4.5_0002718g0050
Nitab4.5_0002367g0120	Nitab4.5_0000628g0070											Nitab4.5_0000073g0500	Nitab4.5_0009380g0050		Nitab4.5_0009781g0010									Nitab4.5_0000141g0090	Nitab4.5_0002853g0100
Nitab4.5_0000635g0010	Nitab4.5_0000679g0080											Nitab4.5_0002570g0020	Nitab4.5_0002859g0080		Nitab4.5_0010037g0010									Nitab4.5_0002055g0020	Nitab4.5_0006179g0020
Nitab4.5_0002794g0030	Nitab4.5_0002753g0010											Nitab4.5_0006485g0010	Nitab4.5_0003914g0050		Nitab4.5_0010473g0030									Nitab4.5_0005487g0010	Nitab4.5_0015172g0010
Nitab4.5_0002398g0060	Nitab4.5_0002969g0060											Nitab4.5_0000826g0270	Nitab4.5_0000110g0200		Nitab4.5_0011815g0020									Nitab4.5_0009567g0010	Nitab4.5_0004594g0010
Nitab4.5_0002580g0050	Nitab4.5_0003577g0040											Nitab4.5_0001727g0010	Nitab4.5_0000193g0120		Nitab4.5_0015741g0010									Nitab4.5_0010461g0020	Nitab4.5_0008438g0040
Nitab4.5_0008351g0020	Nitab4.5_0000713g0230											Nitab4.5_0000944g0090	Nitab4.5_0000434g0170											Nitab4.5_0000009g0500	Nitab4.5_0003497g0070
Nitab4.5_0006592g0010	Nitab4.5_0000403g0130											Nitab4.5_0003241g0010	Nitab4.5_0000651g0080											Nitab4.5_0001274g0040	Nitab4.5_0006239g0020
Nitab4.5_0002317g0020	Nitab4.5_0002167g0030											Nitab4.5_0003441g0130	Nitab4.5_0001134g0090											Nitab4.5_0002486g0040	Nitab4.5_0005064g0060
Nitab4.5_0004914g0010	Nitab4.5_0002311g0020											Nitab4.5_0000376g0150	Nitab4.5_0003835g0020											Nitab4.5_0003603g0040	Nitab4.5_0000583g0340
Nitab4.5_0000191g0070	Nitab4.5_0000232g0130											Nitab4.5_0001645g0070	Nitab4.5_0007255g0040											Nitab4.5_0005466g0030	Nitab4.5_0006942g0040
Nitab4.5_0003160g0020	Nitab4.5_0001401g0130											Nitab4.5_0008535g0020	Nitab4.5_0007845g0010											Nitab4.5_0000143g0580	Nitab4.5_0001428g0010
Nitab4.5_0005609g0010	Nitab4.5_0003726g0100											Nitab4.5_0010570g0040	Nitab4.5_0000159g0150											Nitab4.5_0002826g0060	Nitab4.5_0002740g0020
Nitab4.5_0000238g0040	Nitab4.5_0001725g0120											Nitab4.5_0013452g0020	Nitab4.5_0001290g0160											Nitab4.5_0001789g0120	Nitab4.5_0000585g0030
Nitab4.5_0005757g0020	Nitab4.5_0003795g0010											Nitab4.5_0018057g0010	Nitab4.5_0004725g0010											Nitab4.5_0004653g0020	Nitab4.5_0001950g0060
Nitab4.5_0000676g0300	Nitab4.5_0004570g0090											Nitab4.5_0002661g0030	Nitab4.5_0010796g0010											Nitab4.5_0003841g0040	Nitab4.5_0004979g0130
Nitab4.5_0001834g0010	Nitab4.5_0007490g0070											Nitab4.5_0002112g0040	Nitab4.5_0003540g0150											Nitab4.5_0000076g0060	Nitab4.5_0004979g0140
Nitab4.5_0004800g0070	Nitab4.5_0000245g0020											Nitab4.5_0009020g0010	Nitab4.5_0007087g0030											Nitab4.5_0001225g0250	Nitab4.5_0009598g0010
Nitab4.5_0000183g0150	Nitab4.5_0000094g0020											Nitab4.5_0010352g0010	Nitab4.5_0000140g0040											Nitab4.5_0002005g0020	Nitab4.5_0010037g0020
Nitab4.5_0012693g0010	Nitab4.5_0000164g0080											Nitab4.5_0000615g0030	Nitab4.5_0002064g0010											Nitab4.5_0003029g0020	Nitab4.5_0010037g0030
Nitab4.5_0002641g0010	Nitab4.5_0002038g0020											Nitab4.5_0002773g0080	Nitab4.5_0002790g0010											Nitab4.5_0007410g0030	Nitab4.5_0008816g0020
Nitab4.5_0000029g0060	Nitab4.5_0003506g0020											Nitab4.5_0000564g0160	Nitab4.5_0000747g0040											Nitab4.5_0001781g0170	Nitab4.5_0000086g0050
Nitab4.5_0000006g0140	Nitab4.5_0005979g0030											Nitab4.5_0006635g0010	Nitab4.5_0000360g0120											Nitab4.5_0007799g0010	Nitab4.5_0012351g0020
Nitab4.5_0013295g0010	Nitab4.5_0022963g0010											Nitab4.5_0000580g0260	Nitab4.5_0001356g0110											Nitab4.5_0001473g0020	Nitab4.5_0000398g0020
Nitab4.5_0000058g0120	Nitab4.5_0000185g0120											Nitab4.5_0003441g0020	Nitab4.5_0001807g0080											Nitab4.5_0000513g0100	Nitab4.5_0009001g0010
Nitab4.5_0001179g0080	Nitab4.5_0000244g0140											Nitab4.5_0008580g0020	Nitab4.5_0001999g0030											Nitab4.5_0002532g0030	Nitab4.5_0004891g0050
Nitab4.5_0001584g0010	Nitab4.5_0002054g0010											Nitab4.5_0011583g0010	Nitab4.5_0009051g0020											Nitab4.5_0010062g0010	Nitab4.5_0004982g0020
Nitab4.5_0004550g0010	Nitab4.5_0001654g0010											Nitab4.5_0000505g0110	Nitab4.5_0011908g0010											Nitab4.5_0000451g0150	Nitab4.5_0012621g0010
Nitab4.5_0000748g0140	Nitab4.5_0000273g0090											Nitab4.5_0000356g0010	Nitab4.5_0012393g0010											Nitab4.5_0000040g0470	Nitab4.5_0006358g0030
Nitab4.5_0001799g0060	Nitab4.5_0005538g0020											Nitab4.5_0007436g0010	Nitab4.5_0003602g0030											Nitab4.5_0000413g0120	Nitab4.5_0000034g0250
Nitab4.5_0000886g0100	Nitab4.5_0001271g0010											Nitab4.5_0000451g0140	Nitab4.5_0000596g0040											Nitab4.5_0001201g0040	Nitab4.5_0007310g0010
Nitab4.5_0008254g0030	Nitab4.5_0000291g0010											Nitab4.5_0000892g0010	Nitab4.5_0000738g0100											Nitab4.5_0001915g0030	Nitab4.5_0004294g0050
Nitab4.5_0000651g0100	Nitab4.5_0000354g0030											Nitab4.5_0027463g0010	Nitab4.5_0000472g0210											Nitab4.5_0002222g0070	Nitab4.5_0000664g0230
Nitab4.5_0006069g0040	Nitab4.5_0000465g0140											Nitab4.5_0002776g0080	Nitab4.5_0006389g0020											Nitab4.5_0003465g0090	Nitab4.5_0000669g0220
Nitab4.5_0003337g0060	Nitab4.5_0000263g0170											Nitab4.5_0008696g0010	Nitab4.5_0000015g0210											Nitab4.5_0005936g0030	Nitab4.5_0007806g0020
Nitab4.5_0002229g0120	Nitab4.5_0000928g0010											Nitab4.5_0003820g0010	Nitab4.5_0000673g0030											Nitab4.5_0006764g0010	Nitab4.5_0000788g0020
Nitab4.5_0002342g0130	Nitab4.5_0001981g0060											Nitab4.5_0000026g0030	Nitab4.5_0002367g0170											Nitab4.5_0008718g0040	Nitab4.5_0000566g0280
Nitab4.5_0004679g0020	Nitab4.5_0004539g0010											Nitab4.5_0000641g0050	Nitab4.5_0002439g0070											Nitab4.5_0002367g0120	Nitab4.5_0006787g0010
Nitab4.5_0000178g0340	Nitab4.5_0004539g0030											Nitab4.5_0000026g0020	Nitab4.5_0005771g0020											Nitab4.5_0002793g0080	Nitab4.5_0009985g0020
Nitab4.5_0001378g0100	Nitab4.5_0006700g0030											Nitab4.5_0006766g0010	Nitab4.5_0009965g0010											Nitab4.5_0000798g0050	Nitab4.5_0000116g0140
Nitab4.5_0001552g0150	Nitab4.5_0007449g0020											Nitab4.5_0001864g0090	Nitab4.5_0012222g0020											Nitab4.5_0002794g0030	Nitab4.5_0000803g0070
Nitab4.5_0003200g0090	Nitab4.5_0008864g0010											Nitab4.5_0009332g0010	Nitab4.5_0010369g0010											Nitab4.5_0002580g0050	Nitab4.5_0003484g0090
Nitab4.5_0000820g0050	Nitab4.5_0000436g0210											Nitab4.5_0002209g0170	Nitab4.5_0000459g0060											Nitab4.5_0001701g0040	Nitab4.5_0000706g0110
Nitab4.5_0000106g0210	Nitab4.5_0001005g0070											Nitab4.5_0000008g0030	Nitab4.5_0004441g0010											Nitab4.5_0002317g0020	Nitab4.5_0001755g0060
Nitab4.5_0001066g0030	Nitab4.5_0002290g0020											Nitab4.5_0000008g0060	Nitab4.5_0000716g0250											Nitab4.5_0004914g0010	Nitab4.5_0002304g0070
Nitab4.5_0001769g0080	Nitab4.5_0000515g0130											Nitab4.5_0000008g0070	Nitab4.5_0001508g0070											Nitab4.5_0000191g0070	Nitab4.5_0007527g0010
Nitab4.5_0000071g0010	Nitab4.5_0000059g0320											Nitab4.5_0000008g0080	Nitab4.5_0002310g0070											Nitab4.5_0003160g0020	Nitab4.5_0004963g0030
Nitab4.5_0008544g0010	Nitab4.5_0000085g0380											Nitab4.5_0000008g0130	Nitab4.5_0005648g0020											Nitab4.5_0002750g0070	Nitab4.5_0000779g0050
Nitab4.5_0001663g0210	Nitab4.5_0000430g0060											Nitab4.5_0000008g0140	Nitab4.5_0010472g0010											Nitab4.5_0005609g0010	Nitab4.5_0004474g0030
Nitab4.5_0002723g0050	Nitab4.5_0000521g0070											Nitab4.5_0000008g0150	Nitab4.5_0000578g0170											Nitab4.5_0005908g0010	Nitab4.5_0000222g0180
Nitab4.5_0009169g0030	Nitab4.5_0001935g0040											Nitab4.5_0000008g0170	Nitab4.5_0000690g0010											Nitab4.5_0001436g0010	Nitab4.5_0002783g0120
Nitab4.5_0002262g0160	Nitab4.5_0003309g0060											Nitab4.5_0000008g0180	Nitab4.5_0000915g0200											Nitab4.5_0005757g0020	Nitab4.5_0000376g0230
Nitab4.5_0003779g0050	Nitab4.5_0003234g0080											Nitab4.5_0000008g0190	Nitab4.5_0008928g0030											Nitab4.5_0000676g0270	Nitab4.5_0000048g0070
Nitab4.5_0007386g0010	Nitab4.5_0000300g0140											Nitab4.5_0000652g0050	Nitab4.5_0000100g0110											Nitab4.5_0000676g0300	Nitab4.5_0000057g0080
Nitab4.5_0011556g0020	Nitab4.5_0005911g0010											Nitab4.5_0002823g0010	Nitab4.5_0000078g0090											Nitab4.5_0001834g0010	Nitab4.5_0000078g0290
Nitab4.5_0004853g0010	Nitab4.5_0023951g0010											Nitab4.5_0006055g0010	Nitab4.5_0000214g0050											Nitab4.5_0003944g0030	Nitab4.5_0003227g0040
Nitab4.5_0001648g0020	Nitab4.5_0002893g0030											Nitab4.5_0006055g0020	Nitab4.5_0001254g0010											Nitab4.5_0005337g0040	Nitab4.5_0004027g0010
Nitab4.5_0000007g0320	Nitab4.5_0000005g0550											Nitab4.5_0008292g0020	Nitab4.5_0002438g0030											Nitab4.5_0000183g0150	Nitab4.5_0004981g0050
Nitab4.5_0005274g0020	Nitab4.5_0000005g0590											Nitab4.5_0012027g0010	Nitab4.5_0000574g0040											Nitab4.5_0012693g0010	Nitab4.5_0000601g0110
Nitab4.5_0005353g0010	Nitab4.5_0001266g0040											Nitab4.5_0012932g0010	Nitab4.5_0002364g0060											Nitab4.5_0000029g0060	Nitab4.5_0001256g0090
Nitab4.5_0000381g0090	Nitab4.5_0006029g0020											Nitab4.5_0017813g0010	Nitab4.5_0000502g0160											Nitab4.5_0000197g0010	Nitab4.5_0007834g0020
Nitab4.5_0001401g0060	Nitab4.5_0002898g0060											Nitab4.5_0004940g0030	Nitab4.5_0001774g0030											Nitab4.5_0002695g0140	Nitab4.5_0007834g0030
Nitab4.5_0003726g0020	Nitab4.5_0009304g0010											Nitab4.5_0009332g0030	Nitab4.5_0000284g0010											Nitab4.5_0007963g0100	Nitab4.5_0001128g0120
Nitab4.5_0003160g0080	Nitab4.5_0004212g0040											Nitab4.5_0003750g0040	Nitab4.5_0008362g0020											Nitab4.5_0000006g0140	Nitab4.5_0000108g0260
Nitab4.5_0003160g0090	Nitab4.5_0005301g0030											Nitab4.5_0004974g0090	Nitab4.5_0017496g0010											Nitab4.5_0013295g0010	Nitab4.5_0001437g0200
Nitab4.5_0000108g0260	Nitab4.5_0002150g0080											Nitab4.5_0000316g0340	Nitab4.5_0000015g0100											Nitab4.5_0000486g0140	Nitab4.5_0010239g0010
Nitab4.5_0000041g0270	Nitab4.5_0002294g0130											Nitab4.5_0008912g0010	Nitab4.5_0000319g0290											Nitab4.5_0001179g0080	Nitab4.5_0000201g0220
Nitab4.5_0000442g0190	Nitab4.5_0000240g0060											Nitab4.5_0001751g0030	Nitab4.5_0007028g0030											Nitab4.5_0001584g0010	Nitab4.5_0027786g0010
Nitab4.5_0010979g0010	Nitab4.5_0001968g0140											Nitab4.5_0007330g0010	Nitab4.5_0000128g0200											Nitab4.5_0004044g0010	Nitab4.5_0002114g0020
Nitab4.5_0002287g0080	Nitab4.5_0002322g0090											Nitab4.5_0000913g0050	Nitab4.5_0000241g0170											Nitab4.5_0004550g0010	Nitab4.5_0012400g0010
Nitab4.5_0005590g0020	Nitab4.5_0000550g0100											Nitab4.5_0004291g0010	Nitab4.5_0000710g0010											Nitab4.5_0000748g0140	Nitab4.5_0000244g0110
Nitab4.5_0000044g0630	Nitab4.5_0002845g0070											Nitab4.5_0003919g0010	Nitab4.5_0007807g0010											Nitab4.5_0001799g0060	Nitab4.5_0000989g0030
Nitab4.5_0007995g0010	Nitab4.5_0000351g0220											Nitab4.5_0000258g0290	Nitab4.5_0000786g0030											Nitab4.5_0001223g0170	Nitab4.5_0001998g0050
Nitab4.5_0002015g0040	Nitab4.5_0009131g0030											Nitab4.5_0001268g0010	Nitab4.5_0005108g0020											Nitab4.5_0014470g0010	Nitab4.5_0002738g0060
Nitab4.5_0003979g0020	Nitab4.5_0019872g0010											Nitab4.5_0003768g0060	Nitab4.5_0000036g0240											Nitab4.5_0000886g0100	Nitab4.5_0003185g0070
Nitab4.5_0004862g0050	Nitab4.5_0001031g0040											Nitab4.5_0000112g0060	Nitab4.5_0005726g0020											Nitab4.5_0004745g0020	Nitab4.5_0008614g0010
Nitab4.5_0000057g0330	Nitab4.5_0002887g0160											Nitab4.5_0000489g0120	Nitab4.5_0000679g0080											Nitab4.5_0000653g0050	Nitab4.5_0002985g0020
Nitab4.5_0003189g0020	Nitab4.5_0002354g0030											Nitab4.5_0001854g0010	Nitab4.5_0002969g0060											Nitab4.5_0003474g0020	Nitab4.5_0000208g0200
Nitab4.5_0000006g0090	Nitab4.5_0003757g0050											Nitab4.5_0008716g0020	Nitab4.5_0003577g0040											Nitab4.5_0006069g0040	Nitab4.5_0001194g0010
Nitab4.5_0000373g0060	Nitab4.5_0003885g0100											Nitab4.5_0010325g0010	Nitab4.5_0003062g0050											Nitab4.5_0003337g0060	Nitab4.5_0004895g0030
Nitab4.5_0003463g0060	Nitab4.5_0006801g0010											Nitab4.5_0000618g0030	Nitab4.5_0000713g0230											Nitab4.5_0001997g0040	Nitab4.5_0006638g0030
Nitab4.5_0008266g0020	Nitab4.5_0001079g0100											Nitab4.5_0005960g0010	Nitab4.5_0003890g0030											Nitab4.5_0002229g0120	Nitab4.5_0010492g0010
Nitab4.5_0008575g0020	Nitab4.5_0000343g0020											Nitab4.5_0000183g0020	Nitab4.5_0000659g0050											Nitab4.5_0002342g0130	Nitab4.5_0017241g0010
Nitab4.5_0001031g0160	Nitab4.5_0000762g0090											Nitab4.5_0004181g0030	Nitab4.5_0000403g0130											Nitab4.5_0005926g0020	Nitab4.5_0006195g0060
Nitab4.5_0001863g0220	Nitab4.5_0007549g0020											Nitab4.5_0004030g0030	Nitab4.5_0002167g0030											Nitab4.5_0004679g0020	Nitab4.5_0001176g0060
Nitab4.5_0000044g0130	Nitab4.5_0000006g0580											Nitab4.5_0004905g0070	Nitab4.5_0002311g0020											Nitab4.5_0005135g0010	Nitab4.5_0003509g0040
Nitab4.5_0003299g0010	Nitab4.5_0002154g0010											Nitab4.5_0010004g0040	Nitab4.5_0005269g0010											Nitab4.5_0000178g0340	Nitab4.5_0015723g0010
Nitab4.5_0004343g0030	Nitab4.5_0000131g0230											Nitab4.5_0000059g0130	Nitab4.5_0001401g0130											Nitab4.5_0000222g0170	Nitab4.5_0000097g0120
Nitab4.5_0006095g0050	Nitab4.5_0002880g0100											Nitab4.5_0000565g0170	Nitab4.5_0003726g0100											Nitab4.5_0001013g0090	Nitab4.5_0013892g0010
Nitab4.5_0000787g0190	Nitab4.5_0011770g0020											Nitab4.5_0005196g0050	Nitab4.5_0001725g0120											Nitab4.5_0001617g0060	Nitab4.5_0000351g0010
Nitab4.5_0009578g0030	Nitab4.5_0000339g0140											Nitab4.5_0008213g0060	Nitab4.5_0001725g0150											Nitab4.5_0001552g0150	Nitab4.5_0009963g0010
Nitab4.5_0000152g0220	Nitab4.5_0000782g0070											Nitab4.5_0001637g0080	Nitab4.5_0003795g0020											Nitab4.5_0003200g0090	Nitab4.5_0009260g0040
Nitab4.5_0001112g0040	Nitab4.5_0003040g0020											Nitab4.5_0001121g0250	Nitab4.5_0006443g0020											Nitab4.5_0000820g0050	Nitab4.5_0001800g0010
Nitab4.5_0002736g0020	Nitab4.5_0012105g0010											Nitab4.5_0003507g0020	Nitab4.5_0000094g0020											Nitab4.5_0000106g0210	Nitab4.5_0001367g0050
Nitab4.5_0007415g0020	Nitab4.5_0002815g0120											Nitab4.5_0000364g0040	Nitab4.5_0000164g0080											Nitab4.5_0001066g0030	Nitab4.5_0003939g0020
Nitab4.5_0001451g0030	Nitab4.5_0007963g0040											Nitab4.5_0003307g0040	Nitab4.5_0002038g0020											Nitab4.5_0001769g0080	Nitab4.5_0000184g0260
Nitab4.5_0003648g0010	Nitab4.5_0000239g0060											Nitab4.5_0011758g0010	Nitab4.5_0003506g0020											Nitab4.5_0000071g0010	Nitab4.5_0000104g0330
Nitab4.5_0003331g0100	Nitab4.5_0007887g0010											Nitab4.5_0000602g0070	Nitab4.5_0005979g0030											Nitab4.5_0008544g0010	Nitab4.5_0007383g0010
Nitab4.5_0009720g0020	Nitab4.5_0000027g0530											Nitab4.5_0001939g0040	Nitab4.5_0022963g0010											Nitab4.5_0000147g0030	Nitab4.5_0000205g0170
Nitab4.5_0000147g0270	Nitab4.5_0002338g0020											Nitab4.5_0003542g0130	Nitab4.5_0000185g0120											Nitab4.5_0001663g0210	Nitab4.5_0000833g0060
Nitab4.5_0000798g0120	Nitab4.5_0005830g0010											Nitab4.5_0000787g0270	Nitab4.5_0003152g0170											Nitab4.5_0002723g0050	Nitab4.5_0010835g0010
Nitab4.5_0002231g0050	Nitab4.5_0001639g0070											Nitab4.5_0004106g0010	Nitab4.5_0000244g0140											Nitab4.5_0009169g0030	Nitab4.5_0001823g0050
Nitab4.5_0015866g0010	Nitab4.5_0000305g0020											Nitab4.5_0007295g0030	Nitab4.5_0002775g0010											Nitab4.5_0002262g0160	Nitab4.5_0000421g0130
Nitab4.5_0017067g0010	Nitab4.5_0012245g0030											Nitab4.5_0000152g0080	Nitab4.5_0006594g0020											Nitab4.5_0003779g0050	Nitab4.5_0000469g0170
Nitab4.5_0010196g0020	Nitab4.5_0009284g0020											Nitab4.5_0001600g0040	Nitab4.5_0002054g0010											Nitab4.5_0007386g0010	Nitab4.5_0000513g0130
Nitab4.5_0002289g0120	Nitab4.5_0004155g0020											Nitab4.5_0004812g0050	Nitab4.5_0003470g0050											Nitab4.5_0011556g0020	Nitab4.5_0002628g0060
Nitab4.5_0000845g0040	Nitab4.5_0006148g0060											Nitab4.5_0000349g0320	Nitab4.5_0001654g0010											Nitab4.5_0004853g0010	Nitab4.5_0005823g0010
Nitab4.5_0000845g0150	Nitab4.5_0012779g0020											Nitab4.5_0001279g0120	Nitab4.5_0000273g0090											Nitab4.5_0003726g0020	Nitab4.5_0002589g0030
Nitab4.5_0000863g0230	Nitab4.5_0000525g0130											Nitab4.5_0000552g0060	Nitab4.5_0005538g0020											Nitab4.5_0003160g0080	Nitab4.5_0000199g0040
Nitab4.5_0001361g0170	Nitab4.5_0013227g0020											Nitab4.5_0000749g0090	Nitab4.5_0001340g0040											Nitab4.5_0003160g0090	Nitab4.5_0000308g0310
Nitab4.5_0000209g0210	Nitab4.5_0001520g0080											Nitab4.5_0002669g0020	Nitab4.5_0000291g0010											Nitab4.5_0000962g0080	Nitab4.5_0000746g0010
Nitab4.5_0011210g0030	Nitab4.5_0014599g0010											Nitab4.5_0003620g0010	Nitab4.5_0000354g0030											Nitab4.5_0000044g0630	Nitab4.5_0003265g0050
Nitab4.5_0000565g0110	Nitab4.5_0000978g0070											Nitab4.5_0006978g0010	Nitab4.5_0000465g0140											Nitab4.5_0007995g0010	Nitab4.5_0009228g0010
Nitab4.5_0000178g0300	Nitab4.5_0012375g0030											Nitab4.5_0025058g0010	Nitab4.5_0002135g0100											Nitab4.5_0001836g0020	Nitab4.5_0005022g0010
Nitab4.5_0000399g0060	Nitab4.5_0006014g0050											Nitab4.5_0006365g0090	Nitab4.5_0008656g0020											Nitab4.5_0002015g0040	Nitab4.5_0012264g0010
Nitab4.5_0001617g0050	Nitab4.5_0000104g0210											Nitab4.5_0000294g0140	Nitab4.5_0000123g0260											Nitab4.5_0003979g0020	Nitab4.5_0002046g0050
Nitab4.5_0004090g0080	Nitab4.5_0010758g0040											Nitab4.5_0000611g0030	Nitab4.5_0000263g0170											Nitab4.5_0004862g0050	Nitab4.5_0000696g0060
Nitab4.5_0005097g0060	Nitab4.5_0000003g0740											Nitab4.5_0004836g0060	Nitab4.5_0000642g0120											Nitab4.5_0000057g0330	Nitab4.5_0001437g0080
Nitab4.5_0004088g0080	Nitab4.5_0003494g0020											Nitab4.5_0000317g0040	Nitab4.5_0001981g0060											Nitab4.5_0003189g0020	Nitab4.5_0001871g0030
Nitab4.5_0000236g0060	Nitab4.5_0001105g0150											Nitab4.5_0004946g0060	Nitab4.5_0002175g0060											Nitab4.5_0000006g0090	Nitab4.5_0002370g0050
Nitab4.5_0010734g0020	Nitab4.5_0001772g0020											Nitab4.5_0009399g0030	Nitab4.5_0004539g0010											Nitab4.5_0000373g0060	Nitab4.5_0009125g0010
Nitab4.5_0000044g0150	Nitab4.5_0002003g0070											Nitab4.5_0002114g0140	Nitab4.5_0004539g0030											Nitab4.5_0003463g0060	Nitab4.5_0001573g0060
Nitab4.5_0001783g0090	Nitab4.5_0005385g0030											Nitab4.5_0003441g0100	Nitab4.5_0005156g0020											Nitab4.5_0008266g0020	Nitab4.5_0003745g0030
Nitab4.5_0004439g0100	Nitab4.5_0010808g0020											Nitab4.5_0009567g0030	Nitab4.5_0006700g0030											Nitab4.5_0008575g0020	Nitab4.5_0000410g0310
Nitab4.5_0000222g0140	Nitab4.5_0000175g0100											Nitab4.5_0008719g0010	Nitab4.5_0007449g0020											Nitab4.5_0001031g0160	Nitab4.5_0000620g0230
Nitab4.5_0000923g0050	Nitab4.5_0003710g0030											Nitab4.5_0002231g0030	Nitab4.5_0008410g0020											Nitab4.5_0001863g0220	Nitab4.5_0003848g0020
Nitab4.5_0001013g0080	Nitab4.5_0000682g0050											Nitab4.5_0001295g0090	Nitab4.5_0000978g0140											Nitab4.5_0000044g0130	Nitab4.5_0011714g0010
Nitab4.5_0000149g0240	Nitab4.5_0000791g0130											Nitab4.5_0002817g0010	Nitab4.5_0000044g0240											Nitab4.5_0003299g0010	Nitab4.5_0000180g0090
Nitab4.5_0000156g0210	Nitab4.5_0000974g0060											Nitab4.5_0003585g0030	Nitab4.5_0000436g0210											Nitab4.5_0004343g0030	Nitab4.5_0000201g0290
Nitab4.5_0000180g0080	Nitab4.5_0001569g0160											Nitab4.5_0004699g0040	Nitab4.5_0000436g0220											Nitab4.5_0002182g0030	Nitab4.5_0000604g0040
Nitab4.5_0001899g0070	Nitab4.5_0003373g0060											Nitab4.5_0010788g0030	Nitab4.5_0001005g0070											Nitab4.5_0007717g0070	Nitab4.5_0000192g0090
Nitab4.5_0000421g0110	Nitab4.5_0008474g0010											Nitab4.5_0012011g0020	Nitab4.5_0000515g0130											Nitab4.5_0000787g0190	Nitab4.5_0000250g0190
Nitab4.5_0011630g0010	Nitab4.5_0000874g0080											Nitab4.5_0002297g0080	Nitab4.5_0006398g0010											Nitab4.5_0009578g0030	Nitab4.5_0010090g0010
Nitab4.5_0001170g0190	Nitab4.5_0000091g0320											Nitab4.5_0001287g0050	Nitab4.5_0000033g0300											Nitab4.5_0000152g0220	Nitab4.5_0000800g0020
Nitab4.5_0003676g0080	Nitab4.5_0000483g0220											Nitab4.5_0001287g0070	Nitab4.5_0000430g0060											Nitab4.5_0001451g0030	Nitab4.5_0001485g0160
Nitab4.5_0001040g0200	Nitab4.5_0001374g0240											Nitab4.5_0003810g0020	Nitab4.5_0000521g0070											Nitab4.5_0003648g0010	Nitab4.5_0001931g0020
Nitab4.5_0000001g0430	Nitab4.5_0000029g0210											Nitab4.5_0003810g0030	Nitab4.5_0001381g0120											Nitab4.5_0000072g0300	Nitab4.5_0002052g0100
Nitab4.5_0000693g0040	Nitab4.5_0000138g0180											Nitab4.5_0006291g0060	Nitab4.5_0002289g0070											Nitab4.5_0003331g0100	Nitab4.5_0002695g0030
Nitab4.5_0000755g0140	Nitab4.5_0002862g0020											Nitab4.5_0000637g0030	Nitab4.5_0003234g0080											Nitab4.5_0009720g0020	Nitab4.5_0003345g0010
Nitab4.5_0009324g0030	Nitab4.5_0000371g0020											Nitab4.5_0000190g0050	Nitab4.5_0000300g0140											Nitab4.5_0000147g0270	Nitab4.5_0000201g0180
Nitab4.5_0000168g0120	Nitab4.5_0000227g0310											Nitab4.5_0001778g0090	Nitab4.5_0023951g0010											Nitab4.5_0000798g0120	Nitab4.5_0000278g0220
Nitab4.5_0017412g0010	Nitab4.5_0001396g0030											Nitab4.5_0012199g0010	Nitab4.5_0005597g0020											Nitab4.5_0002231g0050	Nitab4.5_0003079g0040
Nitab4.5_0000856g0120	Nitab4.5_0002266g0080											Nitab4.5_0002782g0100	Nitab4.5_0003878g0040											Nitab4.5_0015866g0010	Nitab4.5_0000676g0090
Nitab4.5_0001244g0140	Nitab4.5_0002786g0080											Nitab4.5_0002016g0030	Nitab4.5_0000005g0590											Nitab4.5_0017067g0010	Nitab4.5_0001140g0110
Nitab4.5_0005367g0010	Nitab4.5_0002914g0140											Nitab4.5_0006095g0020	Nitab4.5_0000359g0070											Nitab4.5_0010196g0020	Nitab4.5_0007842g0020
Nitab4.5_0000968g0050	Nitab4.5_0003058g0020											Nitab4.5_0000070g0210	Nitab4.5_0006029g0020											Nitab4.5_0005030g0050	Nitab4.5_0009310g0010
Nitab4.5_0002137g0140	Nitab4.5_0003058g0030											Nitab4.5_0001304g0020	Nitab4.5_0006856g0030											Nitab4.5_0002289g0120	Nitab4.5_0000019g0060
Nitab4.5_0000073g0500	Nitab4.5_0004086g0020											Nitab4.5_0003969g0050	Nitab4.5_0002898g0060											Nitab4.5_0000845g0040	Nitab4.5_0004788g0020
Nitab4.5_0000170g0350	Nitab4.5_0008247g0070											Nitab4.5_0005525g0080	Nitab4.5_0009304g0010											Nitab4.5_0000845g0150	Nitab4.5_0002520g0060
Nitab4.5_0000826g0270	Nitab4.5_0013659g0010											Nitab4.5_0009474g0010	Nitab4.5_0004212g0040											Nitab4.5_0000863g0230	Nitab4.5_0000296g0030
Nitab4.5_0006169g0040	Nitab4.5_0006549g0030											Nitab4.5_0004813g0030	Nitab4.5_0002150g0080											Nitab4.5_0000209g0210	Nitab4.5_0003109g0010
Nitab4.5_0006485g0010	Nitab4.5_0005221g0010											Nitab4.5_0000100g0050	Nitab4.5_0002294g0130											Nitab4.5_0011210g0030	Nitab4.5_0001022g0030
Nitab4.5_0000082g0210	Nitab4.5_0005407g0020											Nitab4.5_0007001g0020	Nitab4.5_0001968g0140											Nitab4.5_0000565g0110	Nitab4.5_0025212g0010
Nitab4.5_0001727g0010	Nitab4.5_0001541g0050											Nitab4.5_0000712g0030	Nitab4.5_0000671g0130											Nitab4.5_0008213g0010	Nitab4.5_0011966g0010
Nitab4.5_0003241g0010	Nitab4.5_0005766g0030											Nitab4.5_0004337g0010	Nitab4.5_0000898g0130											Nitab4.5_0000178g0300	Nitab4.5_0000236g0010
Nitab4.5_0003441g0130	Nitab4.5_0004186g0060											Nitab4.5_0000742g0180	Nitab4.5_0002322g0090											Nitab4.5_0000399g0060	Nitab4.5_0000574g0020
Nitab4.5_0000376g0150	Nitab4.5_0006014g0060											Nitab4.5_0002256g0020	Nitab4.5_0011429g0030											Nitab4.5_0001617g0050	Nitab4.5_0000628g0110
Nitab4.5_0001645g0070	Nitab4.5_0000170g0270											Nitab4.5_0000145g0180	Nitab4.5_0000550g0100											Nitab4.5_0004090g0080	Nitab4.5_0000636g0070
Nitab4.5_0002661g0030	Nitab4.5_0001437g0220											Nitab4.5_0003407g0030	Nitab4.5_0002845g0070											Nitab4.5_0005097g0060	Nitab4.5_0000636g0120
Nitab4.5_0008535g0020	Nitab4.5_0003774g0040											Nitab4.5_0000012g0040	Nitab4.5_0000351g0220											Nitab4.5_0008210g0020	Nitab4.5_0000965g0040
Nitab4.5_0010570g0040	Nitab4.5_0001892g0040											Nitab4.5_0003981g0060	Nitab4.5_0009131g0030											Nitab4.5_0004798g0040	Nitab4.5_0001436g0020
Nitab4.5_0013452g0020	Nitab4.5_0003187g0080											Nitab4.5_0000123g0010	Nitab4.5_0019872g0010											Nitab4.5_0000236g0060	Nitab4.5_0003307g0010
Nitab4.5_0018057g0010	Nitab4.5_0001986g0030											Nitab4.5_0000759g0050	Nitab4.5_0001031g0040											Nitab4.5_0002058g0110	Nitab4.5_0011146g0010
Nitab4.5_0009020g0010	Nitab4.5_0004028g0040											Nitab4.5_0007767g0040	Nitab4.5_0002887g0160											Nitab4.5_0010734g0020	Nitab4.5_0002769g0080
Nitab4.5_0010352g0010	Nitab4.5_0000439g0020											Nitab4.5_0000294g0030	Nitab4.5_0002354g0030											Nitab4.5_0004439g0100	Nitab4.5_0008772g0020
Nitab4.5_0000615g0030	Nitab4.5_0000634g0220											Nitab4.5_0002067g0070	Nitab4.5_0003757g0050											Nitab4.5_0002257g0180	Nitab4.5_0013575g0010
Nitab4.5_0002335g0070	Nitab4.5_0001186g0050											Nitab4.5_0000239g0040	Nitab4.5_0002161g0070											Nitab4.5_0000222g0140	Nitab4.5_0010773g0010
Nitab4.5_0000471g0010	Nitab4.5_0013227g0010											Nitab4.5_0007887g0030	Nitab4.5_0003885g0100											Nitab4.5_0000923g0050	Nitab4.5_0000574g0130
Nitab4.5_0002773g0080	Nitab4.5_0002791g0040											Nitab4.5_0007061g0100	Nitab4.5_0006801g0010											Nitab4.5_0001013g0080	Nitab4.5_0003070g0010
Nitab4.5_0000564g0160	Nitab4.5_0012449g0020											Nitab4.5_0001118g0040	Nitab4.5_0001079g0100											Nitab4.5_0008288g0010	Nitab4.5_0007727g0010
Nitab4.5_0006635g0010	Nitab4.5_0004605g0110											Nitab4.5_0007460g0010	Nitab4.5_0002154g0010											Nitab4.5_0000149g0240	Nitab4.5_0000615g0030
Nitab4.5_0000580g0260	Nitab4.5_0005402g0010											Nitab4.5_0002187g0050	Nitab4.5_0000131g0230											Nitab4.5_0000156g0210	Nitab4.5_0000227g0050
Nitab4.5_0003441g0020	Nitab4.5_0005219g0110											Nitab4.5_0003377g0020	Nitab4.5_0002880g0100											Nitab4.5_0000180g0080	Nitab4.5_0003986g0010
Nitab4.5_0008580g0020	Nitab4.5_0011723g0010											Nitab4.5_0000308g0230	Nitab4.5_0011770g0020											Nitab4.5_0001899g0070	Nitab4.5_0001998g0010
Nitab4.5_0000356g0010	Nitab4.5_0005036g0010											Nitab4.5_0008819g0010	Nitab4.5_0012105g0010											Nitab4.5_0000421g0110	Nitab4.5_0002738g0070
Nitab4.5_0000451g0140	Nitab4.5_0007327g0030											Nitab4.5_0001183g0090	Nitab4.5_0000744g0180											Nitab4.5_0011630g0010	Nitab4.5_0003136g0040
Nitab4.5_0000892g0010	Nitab4.5_0011657g0020											Nitab4.5_0000287g0050	Nitab4.5_0004718g0010											Nitab4.5_0001170g0190	Nitab4.5_0013405g0010
Nitab4.5_0007436g0010	Nitab4.5_0000375g0320											Nitab4.5_0010126g0010	Nitab4.5_0000588g0280											Nitab4.5_0003676g0080	Nitab4.5_0000505g0100
Nitab4.5_0027463g0010	Nitab4.5_0007762g0010											Nitab4.5_0002228g0030	Nitab4.5_0002695g0070											Nitab4.5_0000693g0040	Nitab4.5_0000639g0240
Nitab4.5_0002776g0080	Nitab4.5_0000214g0130											Nitab4.5_0001200g0090	Nitab4.5_0007963g0040											Nitab4.5_0000755g0140	Nitab4.5_0006988g0040
Nitab4.5_0003820g0010	Nitab4.5_0004653g0030											Nitab4.5_0002886g0090	Nitab4.5_0000239g0060											Nitab4.5_0004833g0030	Nitab4.5_0000008g0920
Nitab4.5_0008696g0010	Nitab4.5_0009202g0010											Nitab4.5_0000855g0140	Nitab4.5_0007887g0010											Nitab4.5_0009324g0030	Nitab4.5_0001489g0040
Nitab4.5_0000026g0030	Nitab4.5_0010603g0010											Nitab4.5_0000036g0350	Nitab4.5_0000404g0170											Nitab4.5_0000168g0120	Nitab4.5_0002051g0020
Nitab4.5_0001503g0120	Nitab4.5_0001807g0050											Nitab4.5_0000576g0040	Nitab4.5_0000305g0020											Nitab4.5_0000856g0120	Nitab4.5_0001229g0010
Nitab4.5_0006766g0010	Nitab4.5_0002259g0040											Nitab4.5_0001600g0140	Nitab4.5_0001084g0030											Nitab4.5_0001244g0140	Nitab4.5_0006239g0010
Nitab4.5_0001726g0110	Nitab4.5_0000782g0050											Nitab4.5_0001615g0020	Nitab4.5_0010205g0020											Nitab4.5_0005367g0010	Nitab4.5_0006355g0020
Nitab4.5_0000008g0030	Nitab4.5_0000495g0020											Nitab4.5_0002975g0040	Nitab4.5_0001586g0200											Nitab4.5_0001599g0100	Nitab4.5_0000564g0020
Nitab4.5_0000008g0060	Nitab4.5_0004269g0060											Nitab4.5_0005362g0040	Nitab4.5_0003218g0080											Nitab4.5_0000073g0500	Nitab4.5_0002980g0050
Nitab4.5_0000008g0130	Nitab4.5_0002803g0030											Nitab4.5_0002761g0050	Nitab4.5_0000187g0210											Nitab4.5_0000170g0350	Nitab4.5_0000287g0380
Nitab4.5_0000008g0150	Nitab4.5_0000926g0070											Nitab4.5_0000257g0150	Nitab4.5_0009284g0020											Nitab4.5_0000826g0270	Nitab4.5_0003427g0070
Nitab4.5_0000008g0180	Nitab4.5_0001935g0020											Nitab4.5_0000259g0330	Nitab4.5_0000830g0050											Nitab4.5_0002570g0020	Nitab4.5_0000596g0080
Nitab4.5_0000652g0050	Nitab4.5_0002449g0050											Nitab4.5_0000284g0040	Nitab4.5_0005262g0010											Nitab4.5_0006169g0040	Nitab4.5_0001702g0160
Nitab4.5_0001864g0090	Nitab4.5_0007505g0020											Nitab4.5_0000604g0030	Nitab4.5_0014599g0010											Nitab4.5_0006485g0010	Nitab4.5_0003779g0090
Nitab4.5_0002209g0170	Nitab4.5_0005777g0030											Nitab4.5_0001119g0070	Nitab4.5_0000484g0040											Nitab4.5_0001727g0010	Nitab4.5_0000229g0010
Nitab4.5_0002823g0010	Nitab4.5_0000738g0080											Nitab4.5_0011583g0030	Nitab4.5_0000978g0070											Nitab4.5_0003241g0010	Nitab4.5_0008539g0020
Nitab4.5_0006055g0010	Nitab4.5_0003874g0030											Nitab4.5_0000470g0170	Nitab4.5_0002691g0040											Nitab4.5_0003441g0130	Nitab4.5_0000035g0020
Nitab4.5_0008292g0020	Nitab4.5_0006105g0040											Nitab4.5_0009483g0010	Nitab4.5_0012375g0030											Nitab4.5_0000376g0150	Nitab4.5_0006801g0030
Nitab4.5_0009332g0010	Nitab4.5_0009612g0010											Nitab4.5_0002520g0030	Nitab4.5_0001937g0010											Nitab4.5_0001645g0070	Nitab4.5_0005241g0060
Nitab4.5_0012027g0010	Nitab4.5_0000430g0170											Nitab4.5_0000059g0310	Nitab4.5_0006640g0030											Nitab4.5_0002661g0030	Nitab4.5_0005692g0020
Nitab4.5_0012932g0010	Nitab4.5_0001014g0100											Nitab4.5_0011041g0010	Nitab4.5_0000104g0210											Nitab4.5_0008535g0020	Nitab4.5_0001842g0010
Nitab4.5_0017813g0010	Nitab4.5_0000052g0020											Nitab4.5_0000013g0060	Nitab4.5_0010758g0040											Nitab4.5_0010570g0040	Nitab4.5_0000034g0150
Nitab4.5_0009332g0030	Nitab4.5_0001557g0030											Nitab4.5_0002998g0050	Nitab4.5_0003494g0020											Nitab4.5_0013452g0020	Nitab4.5_0000116g0180
Nitab4.5_0003750g0040	Nitab4.5_0004777g0030											Nitab4.5_0000032g0220	Nitab4.5_0000651g0110											Nitab4.5_0018057g0010	Nitab4.5_0002454g0020
Nitab4.5_0004974g0090	Nitab4.5_0000277g0050											Nitab4.5_0000129g0330	Nitab4.5_0001105g0150											Nitab4.5_0002112g0040	Nitab4.5_0012018g0010
Nitab4.5_0010299g0040	Nitab4.5_0011740g0010											Nitab4.5_0010895g0010	Nitab4.5_0001772g0020											Nitab4.5_0009020g0010	Nitab4.5_0000119g0420
Nitab4.5_0000316g0340	Nitab4.5_0000633g0150											Nitab4.5_0005492g0010	Nitab4.5_0002003g0070											Nitab4.5_0010352g0010	Nitab4.5_0006168g0020
Nitab4.5_0008912g0010	Nitab4.5_0001035g0050											Nitab4.5_0000153g0190	Nitab4.5_0010808g0020											Nitab4.5_0000294g0010	Nitab4.5_0009380g0050
Nitab4.5_0001751g0030	Nitab4.5_0008211g0010											Nitab4.5_0000213g0080	Nitab4.5_0003710g0030											Nitab4.5_0006854g0050	Nitab4.5_0002436g0120
Nitab4.5_0007330g0010	Nitab4.5_0006060g0020											Nitab4.5_0000839g0070	Nitab4.5_0000682g0050											Nitab4.5_0002773g0080	Nitab4.5_0000110g0200
Nitab4.5_0000913g0050	Nitab4.5_0000024g0180											Nitab4.5_0000967g0110	Nitab4.5_0000974g0060											Nitab4.5_0000564g0160	Nitab4.5_0000105g0260
Nitab4.5_0004291g0010	Nitab4.5_0000024g0200											Nitab4.5_0001806g0020	Nitab4.5_0001569g0160											Nitab4.5_0000593g0300	Nitab4.5_0000193g0120
Nitab4.5_0001160g0130	Nitab4.5_0000446g0060											Nitab4.5_0005528g0110	Nitab4.5_0003373g0060											Nitab4.5_0006308g0010	Nitab4.5_0000434g0170
Nitab4.5_0004362g0020	Nitab4.5_0003042g0010											Nitab4.5_0006024g0010	Nitab4.5_0008474g0010											Nitab4.5_0006635g0010	Nitab4.5_0001134g0090
Nitab4.5_0003919g0010	Nitab4.5_0026719g0010											Nitab4.5_0006247g0010	Nitab4.5_0000874g0080											Nitab4.5_0000580g0260	Nitab4.5_0003296g0030
Nitab4.5_0001268g0010	Nitab4.5_0004557g0080											Nitab4.5_0009189g0020	Nitab4.5_0000029g0210											Nitab4.5_0003441g0020	Nitab4.5_0003835g0020
Nitab4.5_0003768g0060	Nitab4.5_0000581g0170											Nitab4.5_0000839g0050	Nitab4.5_0000138g0180											Nitab4.5_0008580g0020	Nitab4.5_0007845g0010
Nitab4.5_0000112g0060	Nitab4.5_0000377g0130											Nitab4.5_0000754g0110	Nitab4.5_0008682g0020											Nitab4.5_0000356g0010	Nitab4.5_0009190g0010
Nitab4.5_0000489g0120	Nitab4.5_0000884g0030											Nitab4.5_0000073g0240	Nitab4.5_0000023g0660											Nitab4.5_0000451g0140	Nitab4.5_0001290g0160
Nitab4.5_0008716g0020	Nitab4.5_0000625g0050											Nitab4.5_0004234g0010	Nitab4.5_0000227g0310											Nitab4.5_0000505g0110	Nitab4.5_0004725g0010
Nitab4.5_0010325g0010	Nitab4.5_0000691g0010											Nitab4.5_0000071g0110	Nitab4.5_0001207g0080											Nitab4.5_0000892g0010	Nitab4.5_0003540g0150
Nitab4.5_0000618g0030	Nitab4.5_0011323g0020											Nitab4.5_0005501g0030	Nitab4.5_0001396g0030											Nitab4.5_0007436g0010	Nitab4.5_0007087g0030
Nitab4.5_0001076g0110	Nitab4.5_0002113g0180											Nitab4.5_0006507g0040	Nitab4.5_0001945g0030											Nitab4.5_0011583g0010	Nitab4.5_0000140g0040
Nitab4.5_0000183g0020	Nitab4.5_0001658g0020											Nitab4.5_0000368g0180	Nitab4.5_0002266g0080											Nitab4.5_0027463g0010	Nitab4.5_0002064g0010
Nitab4.5_0004181g0030	Nitab4.5_0001892g0050											Nitab4.5_0000553g0100	Nitab4.5_0002458g0090											Nitab4.5_0002776g0080	Nitab4.5_0002790g0010
Nitab4.5_0004030g0030	Nitab4.5_0010633g0050											Nitab4.5_0001307g0110	Nitab4.5_0002543g0150											Nitab4.5_0003820g0010	Nitab4.5_0000747g0040
Nitab4.5_0000059g0130	Nitab4.5_0000008g0850											Nitab4.5_0001569g0110	Nitab4.5_0002757g0100											Nitab4.5_0008696g0010	Nitab4.5_0000360g0120
Nitab4.5_0000565g0170	Nitab4.5_0000010g0120											Nitab4.5_0003823g0060	Nitab4.5_0002786g0080											Nitab4.5_0000026g0020	Nitab4.5_0001807g0080
Nitab4.5_0001121g0250	Nitab4.5_0004030g0060											Nitab4.5_0004895g0060	Nitab4.5_0003058g0020											Nitab4.5_0000026g0030	Nitab4.5_0009051g0020
Nitab4.5_0001637g0080	Nitab4.5_0000381g0220											Nitab4.5_0005199g0030	Nitab4.5_0003058g0030											Nitab4.5_0000641g0050	Nitab4.5_0011908g0010
Nitab4.5_0002171g0060	Nitab4.5_0003995g0010											Nitab4.5_0006232g0010	Nitab4.5_0003229g0060											Nitab4.5_0006766g0010	Nitab4.5_0015173g0010
Nitab4.5_0002467g0040	Nitab4.5_0007848g0010											Nitab4.5_0021182g0010	Nitab4.5_0003771g0020											Nitab4.5_0001726g0110	Nitab4.5_0003602g0030
Nitab4.5_0002715g0110	Nitab4.5_0008336g0010											Nitab4.5_0000073g0270	Nitab4.5_0004086g0020											Nitab4.5_0000008g0030	Nitab4.5_0000044g0560
Nitab4.5_0003507g0020	Nitab4.5_0000278g0160											Nitab4.5_0004234g0080	Nitab4.5_0004730g0040											Nitab4.5_0000008g0060	Nitab4.5_0001367g0060
Nitab4.5_0004905g0070	Nitab4.5_0000642g0170											Nitab4.5_0006454g0010	Nitab4.5_0005392g0010											Nitab4.5_0000008g0070	Nitab4.5_0000966g0070
Nitab4.5_0005196g0050	Nitab4.5_0000713g0070											Nitab4.5_0004527g0010	Nitab4.5_0006549g0030											Nitab4.5_0000008g0080	Nitab4.5_0001315g0210
Nitab4.5_0008213g0060	Nitab4.5_0001047g0070											Nitab4.5_0000417g0040	Nitab4.5_0003766g0020											Nitab4.5_0000008g0130	Nitab4.5_0003105g0020
Nitab4.5_0010004g0040	Nitab4.5_0002875g0030											Nitab4.5_0001471g0010	Nitab4.5_0005221g0010											Nitab4.5_0000008g0140	Nitab4.5_0001707g0100
Nitab4.5_0000364g0040	Nitab4.5_0004087g0040											Nitab4.5_0002284g0050	Nitab4.5_0001094g0110											Nitab4.5_0000008g0150	Nitab4.5_0000059g0450
Nitab4.5_0003307g0040	Nitab4.5_0006560g0010											Nitab4.5_0005223g0040	Nitab4.5_0005407g0020											Nitab4.5_0000008g0180	Nitab4.5_0000191g0190
Nitab4.5_0011758g0010	Nitab4.5_0008659g0010											Nitab4.5_0001809g0010	Nitab4.5_0000927g0060											Nitab4.5_0000652g0050	Nitab4.5_0000673g0030
Nitab4.5_0006383g0020	Nitab4.5_0000057g0160											Nitab4.5_0000381g0360	Nitab4.5_0005766g0030											Nitab4.5_0001864g0090	Nitab4.5_0002367g0170
Nitab4.5_0000602g0070	Nitab4.5_0000070g0110											Nitab4.5_0000391g0280	Nitab4.5_0006014g0060											Nitab4.5_0002209g0170	Nitab4.5_0000459g0060
Nitab4.5_0001939g0040	Nitab4.5_0000244g0260											Nitab4.5_0002430g0020	Nitab4.5_0000170g0270											Nitab4.5_0002823g0010	Nitab4.5_0004441g0010
Nitab4.5_0000787g0200	Nitab4.5_0000578g0120											Nitab4.5_0004342g0010	Nitab4.5_0000807g0160											Nitab4.5_0006055g0010	Nitab4.5_0001508g0070
Nitab4.5_0000787g0270	Nitab4.5_0000610g0290											Nitab4.5_0002162g0030	Nitab4.5_0001772g0070											Nitab4.5_0006055g0020	Nitab4.5_0004775g0060
Nitab4.5_0004106g0010	Nitab4.5_0000649g0090											Nitab4.5_0007985g0030	Nitab4.5_0001437g0220											Nitab4.5_0008292g0020	Nitab4.5_0005615g0030
Nitab4.5_0007295g0010	Nitab4.5_0001256g0080											Nitab4.5_0001194g0050	Nitab4.5_0003774g0040											Nitab4.5_0009332g0010	Nitab4.5_0005648g0020
Nitab4.5_0007295g0030	Nitab4.5_0002222g0050											Nitab4.5_0007090g0020	Nitab4.5_0002687g0020											Nitab4.5_0012027g0010	Nitab4.5_0010472g0010
Nitab4.5_0009643g0050	Nitab4.5_0002300g0110											Nitab4.5_0009775g0010	Nitab4.5_0008140g0020											Nitab4.5_0012932g0010	Nitab4.5_0000578g0170
Nitab4.5_0000152g0080	Nitab4.5_0002906g0080											Nitab4.5_0010117g0020	Nitab4.5_0020598g0010											Nitab4.5_0017813g0010	Nitab4.5_0000690g0010
Nitab4.5_0008062g0030	Nitab4.5_0003179g0030											Nitab4.5_0001506g0080	Nitab4.5_0001986g0030											Nitab4.5_0004940g0030	Nitab4.5_0008928g0030
Nitab4.5_0013369g0010	Nitab4.5_0003212g0030											Nitab4.5_0003603g0090	Nitab4.5_0004028g0040											Nitab4.5_0009332g0030	Nitab4.5_0001952g0130
Nitab4.5_0000013g0560	Nitab4.5_0004621g0030											Nitab4.5_0003603g0120	Nitab4.5_0000439g0020											Nitab4.5_0003750g0040	Nitab4.5_0000321g0190
Nitab4.5_0001411g0030	Nitab4.5_0005224g0050											Nitab4.5_0000214g0080	Nitab4.5_0000634g0220											Nitab4.5_0004974g0090	Nitab4.5_0009021g0020
Nitab4.5_0001600g0040	Nitab4.5_0005396g0070											Nitab4.5_0000518g0090	Nitab4.5_0001186g0050											Nitab4.5_0010299g0040	Nitab4.5_0001508g0030
Nitab4.5_0004812g0050	Nitab4.5_0007679g0010											Nitab4.5_0000075g0040	Nitab4.5_0013227g0010											Nitab4.5_0000316g0340	Nitab4.5_0000100g0110
Nitab4.5_0000552g0060	Nitab4.5_0008488g0010											Nitab4.5_0000806g0150	Nitab4.5_0000596g0150											Nitab4.5_0008912g0010	Nitab4.5_0001254g0010
Nitab4.5_0000749g0090	Nitab4.5_0000003g0210											Nitab4.5_0002157g0010	Nitab4.5_0012177g0010											Nitab4.5_0001751g0030	Nitab4.5_0004355g0040
Nitab4.5_0001199g0050	Nitab4.5_0000247g0080											Nitab4.5_0007024g0020	Nitab4.5_0012449g0020											Nitab4.5_0007330g0010	Nitab4.5_0000574g0040
Nitab4.5_0001279g0120	Nitab4.5_0000956g0010											Nitab4.5_0000993g0110	Nitab4.5_0004605g0110											Nitab4.5_0000913g0050	Nitab4.5_0002364g0060
Nitab4.5_0002669g0020	Nitab4.5_0001369g0030											Nitab4.5_0004782g0030	Nitab4.5_0005402g0010											Nitab4.5_0004291g0010	Nitab4.5_0000502g0160
Nitab4.5_0003620g0010	Nitab4.5_0004993g0020											Nitab4.5_0002805g0100	Nitab4.5_0005219g0110											Nitab4.5_0001160g0130	Nitab4.5_0000712g0190
Nitab4.5_0006978g0010	Nitab4.5_0021887g0010											Nitab4.5_0000876g0220	Nitab4.5_0011723g0010											Nitab4.5_0004362g0020	Nitab4.5_0000284g0010
Nitab4.5_0025058g0010	Nitab4.5_0001180g0220											Nitab4.5_0012202g0020	Nitab4.5_0009179g0010											Nitab4.5_0003919g0010	Nitab4.5_0005326g0040
Nitab4.5_0000294g0140	Nitab4.5_0000105g0020											Nitab4.5_0005805g0050	Nitab4.5_0011657g0020											Nitab4.5_0000258g0290	Nitab4.5_0001714g0080
Nitab4.5_0001235g0030	Nitab4.5_0011083g0010											Nitab4.5_0006574g0010	Nitab4.5_0000375g0320											Nitab4.5_0001268g0010	Nitab4.5_0008362g0020
Nitab4.5_0000343g0120	Nitab4.5_0001777g0040											Nitab4.5_0000915g0090	Nitab4.5_0000214g0130											Nitab4.5_0003768g0060	Nitab4.5_0000319g0290
Nitab4.5_0002720g0070	Nitab4.5_0000541g0100											Nitab4.5_0003501g0080	Nitab4.5_0001668g0120											Nitab4.5_0002206g0010	Nitab4.5_0007028g0030
Nitab4.5_0000611g0030	Nitab4.5_0003781g0060											Nitab4.5_0000915g0100	Nitab4.5_0001953g0140											Nitab4.5_0000112g0060	Nitab4.5_0000128g0200
Nitab4.5_0003463g0120	Nitab4.5_0003642g0060											Nitab4.5_0010695g0040	Nitab4.5_0004653g0030											Nitab4.5_0000489g0120	Nitab4.5_0000241g0170
Nitab4.5_0004836g0060	Nitab4.5_0000039g0010											Nitab4.5_0010236g0020	Nitab4.5_0009202g0010											Nitab4.5_0001854g0010	Nitab4.5_0000710g0010
Nitab4.5_0000317g0040	Nitab4.5_0009043g0010											Nitab4.5_0000570g0190	Nitab4.5_0001076g0020											Nitab4.5_0004352g0010	Nitab4.5_0007807g0010
Nitab4.5_0004946g0060	Nitab4.5_0000297g0130											Nitab4.5_0001591g0190	Nitab4.5_0010603g0010											Nitab4.5_0008716g0020	Nitab4.5_0000786g0030
Nitab4.5_0009399g0030	Nitab4.5_0004848g0080											Nitab4.5_0001982g0090	Nitab4.5_0001807g0050											Nitab4.5_0000106g0250	Nitab4.5_0005108g0020
Nitab4.5_0004899g0140	Nitab4.5_0000075g0280											Nitab4.5_0001231g0070	Nitab4.5_0002259g0040											Nitab4.5_0010325g0010	Nitab4.5_0005726g0020
Nitab4.5_0008462g0010	Nitab4.5_0007505g0010											Nitab4.5_0001264g0030	Nitab4.5_0000495g0020											Nitab4.5_0000618g0030	Nitab4.5_0000679g0080
Nitab4.5_0009567g0030	Nitab4.5_0004208g0010											Nitab4.5_0009569g0010	Nitab4.5_0004269g0060											Nitab4.5_0001076g0110	Nitab4.5_0002969g0060
Nitab4.5_0002231g0030	Nitab4.5_0008610g0040											Nitab4.5_0000110g0130	Nitab4.5_0000147g0280											Nitab4.5_0000183g0020	Nitab4.5_0011605g0010
Nitab4.5_0007949g0030	Nitab4.5_0012115g0020											Nitab4.5_0006518g0020	Nitab4.5_0001668g0080											Nitab4.5_0004181g0030	Nitab4.5_0003062g0050
Nitab4.5_0001287g0050	Nitab4.5_0000568g0080											Nitab4.5_0000906g0020	Nitab4.5_0004646g0050											Nitab4.5_0004030g0030	Nitab4.5_0003586g0060
Nitab4.5_0001287g0070	Nitab4.5_0001320g0120											Nitab4.5_0001301g0140	Nitab4.5_0001678g0010											Nitab4.5_0000059g0130	Nitab4.5_0000713g0230
Nitab4.5_0001295g0090	Nitab4.5_0000014g0100											Nitab4.5_0001580g0100	Nitab4.5_0001935g0020											Nitab4.5_0000368g0360	Nitab4.5_0000915g0170
Nitab4.5_0002297g0080	Nitab4.5_0001204g0110											Nitab4.5_0003091g0010	Nitab4.5_0000368g0430											Nitab4.5_0000565g0170	Nitab4.5_0000659g0050
Nitab4.5_0002817g0010	Nitab4.5_0004300g0180											Nitab4.5_0009955g0010	Nitab4.5_0001499g0030											Nitab4.5_0001121g0250	Nitab4.5_0000403g0130
Nitab4.5_0003585g0030	Nitab4.5_0000676g0010											Nitab4.5_0010686g0010	Nitab4.5_0002449g0050											Nitab4.5_0001637g0080	Nitab4.5_0002167g0030
Nitab4.5_0003810g0020	Nitab4.5_0000348g0140											Nitab4.5_0009304g0020	Nitab4.5_0000738g0080											Nitab4.5_0002171g0060	Nitab4.5_0002311g0020
Nitab4.5_0004699g0040	Nitab4.5_0000635g0210											Nitab4.5_0003322g0030	Nitab4.5_0003874g0030											Nitab4.5_0002715g0110	Nitab4.5_0005269g0010
Nitab4.5_0010788g0030	Nitab4.5_0006467g0050											Nitab4.5_0000912g0230	Nitab4.5_0006105g0040											Nitab4.5_0003507g0020	Nitab4.5_0009220g0020
Nitab4.5_0012011g0020	Nitab4.5_0000324g0160											Nitab4.5_0000185g0130	Nitab4.5_0009612g0010											Nitab4.5_0004905g0070	Nitab4.5_0001401g0130
Nitab4.5_0005580g0030	Nitab4.5_0000672g0050											Nitab4.5_0006594g0010	Nitab4.5_0001655g0260											Nitab4.5_0005196g0050	Nitab4.5_0003726g0100
Nitab4.5_0005580g0020	Nitab4.5_0004353g0040											Nitab4.5_0001485g0030	Nitab4.5_0000430g0170											Nitab4.5_0008213g0060	Nitab4.5_0001725g0120
Nitab4.5_0000003g0040	Nitab4.5_0000258g0250											Nitab4.5_0001485g0050	Nitab4.5_0000052g0020											Nitab4.5_0010004g0040	Nitab4.5_0001725g0150
Nitab4.5_0001287g0080	Nitab4.5_0003865g0080											Nitab4.5_0007160g0040	Nitab4.5_0001557g0030											Nitab4.5_0000364g0040	Nitab4.5_0002720g0050
Nitab4.5_0002817g0050	Nitab4.5_0005345g0060											Nitab4.5_0001239g0050	Nitab4.5_0003956g0030											Nitab4.5_0003307g0040	Nitab4.5_0003795g0020
Nitab4.5_0001778g0090	Nitab4.5_0003838g0090											Nitab4.5_0006969g0040	Nitab4.5_0004777g0030											Nitab4.5_0002117g0030	Nitab4.5_0000094g0020
Nitab4.5_0002782g0100	Nitab4.5_0007733g0010											Nitab4.5_0000363g0120	Nitab4.5_0011740g0010											Nitab4.5_0010620g0010	Nitab4.5_0000164g0080
Nitab4.5_0003133g0040	Nitab4.5_0001952g0050											Nitab4.5_0003324g0090	Nitab4.5_0000633g0150											Nitab4.5_0001030g0140	Nitab4.5_0003506g0020
Nitab4.5_0005259g0020	Nitab4.5_0000319g0040											Nitab4.5_0003714g0060	Nitab4.5_0001035g0050											Nitab4.5_0011758g0010	Nitab4.5_0022963g0010
Nitab4.5_0012199g0010	Nitab4.5_0010809g0030											Nitab4.5_0000694g0080	Nitab4.5_0008211g0010											Nitab4.5_0000602g0070	Nitab4.5_0000185g0120
Nitab4.5_0006095g0020	Nitab4.5_0005883g0030											Nitab4.5_0002112g0160	Nitab4.5_0006060g0020											Nitab4.5_0001939g0040	Nitab4.5_0003152g0170
Nitab4.5_0000483g0130	Nitab4.5_0022042g0010											Nitab4.5_0000137g0100	Nitab4.5_0000024g0180											Nitab4.5_0000007g0050	Nitab4.5_0000244g0140
Nitab4.5_0004646g0070	Nitab4.5_0000742g0010											Nitab4.5_0002898g0030	Nitab4.5_0005767g0030											Nitab4.5_0003609g0010	Nitab4.5_0000500g0020
[truncated: 2,174 more rows]

## Sheet: Table S4
Table S4. List of cell wall development-related genes identified in N. tabacum in the current study.
[truncated: 157 more rows]

## Sheet: Table S5
Table S5. FPKM values of cell wall development-related genes in response to R. solanacearum and water in this study.
[truncated: 585 more rows]

[truncated: 9 more sheets: Table S6, Table S7, Table S8, Table S9, Table S10, Table S11, Table S12, Table S13, Table S14]
